# Supplementary material for: Hydroxy group-enabled highly regio- and stereo-selective hydrocarboxylation of alkynes
Source: Royal Society of Chemistry journal article supplement (doi:10.1039/c8sc05743e), 2019-01-01

## Hydroxy Group-Enabled Highly Regio- and Stereo-selective Hydrocarboxylation of Alkynes

Chaofan Huang,<sup>a</sup> Hui Qian,<sup>a</sup> Wanli Zhang,<sup>a\*</sup> and Shengming Ma<sup>a,b\*</sup>

<sup>a</sup> Research Center for Molecular Recognition and Synthesis, Department of Chemistry, Fudan University, 220 Handan Lu, Shanghai 200433, P. R. China

<sup>b</sup> State Key Laboratory of Organometallic Chemistry, Shanghai Institute of Organic Chemistry, Chinese Academy of Sciences, 345 Lingling Lu, Shanghai 200032, P. R. China

|                                                                                        |          |
|----------------------------------------------------------------------------------------|----------|
| General information                                                                    | S2       |
| Screening of palladium catalyst, ligand, reaction temperature and solvent              | S3-S5    |
| Experimental details and analytical data                                               | S6-S41   |
| Synthetic applications                                                                 | S41-S44  |
| Mechanistic studies                                                                    | S44-S63  |
| References                                                                             | S64      |
| <sup>1</sup> H, <sup>13</sup> C, <sup>19</sup> F NMR, and HPLC spectra of the products | S64-S230 |

**General Information.** NMR spectra were taken with an Agilent-400 spectrometer (400 MHz for  $^1\text{H}$  NMR, 100 MHz for  $^{13}\text{C}$  NMR, 376 MHz for  $^{19}\text{F}$  NMR) in  $\text{CDCl}_3$  or  $d_6$ -DMSO. All  $^1\text{H}$  NMR experiments were measured with tetramethylsilane (0 ppm) in  $\text{CDCl}_3$  or the signal of residual DMSO (2.50 ppm) in  $d_6$ -DMSO as the internal reference;  $^{13}\text{C}$  NMR experiments were measured in relative to the signal of  $\text{CDCl}_3$  (77.0 ppm) or the signal of  $d_6$ -DMSO (39.52 ppm);  $^{19}\text{F}$  NMR experiments were measured in relative to the signal of  $\text{CFCl}_3$  (0 ppm) in  $\text{CDCl}_3$ . All reactions were carried out in flame-dried Schlenk tubes.  $\text{Pd}(\text{TFA})_2$  was purchased from J&K Chemicals, Meryer Chemical Technology CO., Ltd, and Macklin Biochemical Co., Ltd; DPEphos was purchased from Acros Organics or Energy Chemical; 2,2'-Bis(dicyclohexylphosphino)-1,1'-biphenyl was purchased from Strem Chemicals, Inc.;  $(\text{PhO})_2\text{POOH}$  was purchased from Energy Chemical and purified through stirring with 1 N HCl, extracting with dichloromethane, and removing solvents under vacuum; MeOH was purchased from Sinopharm Chemical Reagent Co., Ltd;  $^n\text{BuLi}$  was purchased from Energy Chemical and Infinity Scientific (Beijing) Co. Ltd. Petroleum ether (b.p. 60-90  $^\circ\text{C}$ ) was purchased from Shanghai Titan Scientific Co., Ltd. Toluene was dried over sodium wire with benzophenone as the indicator and distilled freshly before use. THF was dried over sodium wire. The reaction should be conducted in a hood working efficiently due to the toxicity of CO gas. All the temperatures are referred to the oil baths used. Recoveries of substrates were determined by  $^1\text{H}$  NMR analysis using dibromomethane as the internal standard. The starting propargylic alcohols were synthesized according to the reported procedures.<sup>1</sup>

**Table S1 Screening of palladium catalyst and ligand for substrate **1a** <sup>a</sup>**

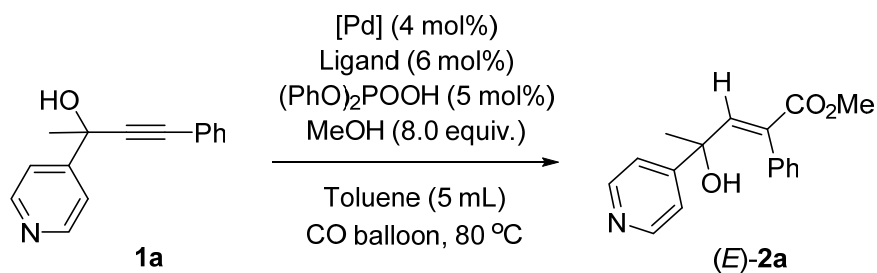

| Entry | [Pd]                                               | Ligand                | NMR yield of ( <i>E</i> )- <b>2a</b> (%) <sup>b</sup> | Recovery of <b>1a</b> (%) <sup>b</sup> |
|-------|----------------------------------------------------|-----------------------|-------------------------------------------------------|----------------------------------------|
| 1     | [PdCl( $\pi$ -allyl)] <sub>2</sub>                 | DPEphos               | 66                                                    | 25                                     |
| 2     | Pd <sub>2</sub> (dba) <sub>3</sub>                 | DPEphos               | 57                                                    | 34                                     |
| 3     | Pd( <i>t</i> -Bu <sub>2</sub> -PPh) <sub>2</sub>   | DPEphos               | 78                                                    | 12                                     |
| 4     | Pd(PPh <sub>3</sub> ) <sub>4</sub>                 | DPEphos               | 82                                                    | 15                                     |
| 5     | Pd(PPh <sub>3</sub> ) <sub>2</sub> Cl <sub>2</sub> | DPEphos               | -                                                     | 99                                     |
| 6     | Pd(TFA) <sub>2</sub>                               | DPEphos               | 82                                                    | 6                                      |
| 7     | Pd(OAc) <sub>2</sub>                               | DPEphos               | 70                                                    | 4                                      |
| 8     | PdCl <sub>2</sub>                                  | DPEphos               | 2                                                     | 86                                     |
| 9     | PdBr <sub>2</sub>                                  | DPEphos               | 5                                                     | 95                                     |
| 10    | [PdCl( $\pi$ -cinamyl)] <sub>2</sub>               | DPEphos               | 46                                                    | 44                                     |
| 11    | Pd(acac) <sub>2</sub>                              | DPEphos               | 59                                                    | 25                                     |
| 12    | Pd(TFA) <sub>2</sub>                               | BINAP                 | 26                                                    | 67                                     |
| 13    | Pd(TFA) <sub>2</sub>                               | DPPB                  | 33                                                    | 43                                     |
| 14    | Pd(TFA) <sub>2</sub>                               | <b>L</b> <sub>1</sub> | 32                                                    | 69                                     |
| 15    | Pd(TFA) <sub>2</sub>                               | <b>L</b> <sub>2</sub> | 6                                                     | 54                                     |

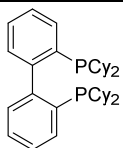

**L**<sub>1</sub>

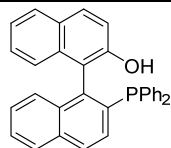

**L**<sub>2</sub>

<sup>a</sup> **Condition A:** **1a** (1.0 mmol), [Pd] (4 mol%), ligand (6 mol%), (PhO)<sub>2</sub>POOH (5 mol%), MeOH (8.0 mmol), CO balloon, toluene (5 mL), 80 °C, 16 h. <sup>b</sup> Determined by <sup>1</sup>H NMR analysis using CH<sub>2</sub>Br<sub>2</sub> as the internal standard.

**Table S2 Screening of temperature <sup>a</sup>**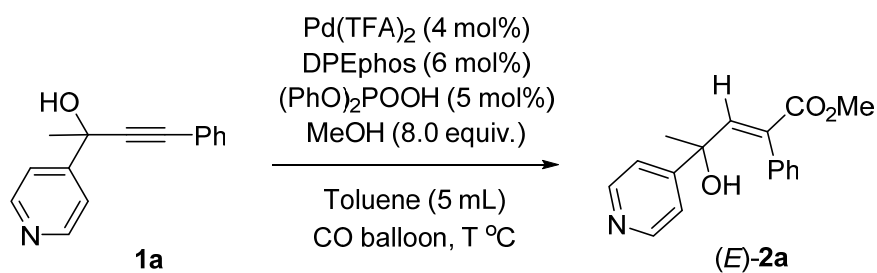

| Entry          | T / °C | NMR yield of <b>(E)-2a</b> (%) <sup>b</sup> | Recovery of <b>1a</b> (%) <sup>b</sup> |
|----------------|--------|---------------------------------------------|----------------------------------------|
| 1              | 80     | 82                                          | 6                                      |
| 2              | 85     | 9                                           | 68                                     |
| 3              | 70     | 90                                          | -                                      |
| 4              | 60     | 90                                          | -                                      |
| 5              | 50     | 45                                          | 53                                     |
| 6 <sup>c</sup> | 60     | 89                                          | -                                      |

<sup>a</sup> **Condition A:** **1a** (1.0 mmol), Pd(TFA)<sub>2</sub> (4 mol%), DPEphos (6 mol%), (PhO)<sub>2</sub>POOH (5 mol%), MeOH (8.0 mmol), CO balloon, toluene (5 mL), 80 °C, 16 h. <sup>b</sup> Determined by <sup>1</sup>H NMR analysis using CH<sub>2</sub>Br<sub>2</sub> as the internal standard. <sup>c</sup> The reaction was carried out without (PhO)<sub>2</sub>POOH.

**Table S3 Screening of palladium catalyst and ligand for substrate **1k**<sup>a</sup>**

| Entry               | [Pd]                               | Ligand                | T / °C | NMR yield of ( <i>E</i> )- <b>2k</b> (%) <sup>b</sup> | Recovery of <b>1k</b> (%) <sup>b</sup> |
|---------------------|------------------------------------|-----------------------|--------|-------------------------------------------------------|----------------------------------------|
| 1 <sup>c</sup>      | Pd(TFA) <sub>2</sub>               | DPEphos               | 60     | 35                                                    | -                                      |
| 2 <sup>c</sup>      | Pd(TFA) <sub>2</sub>               | DPEphos               | 50     | 49                                                    | -                                      |
| 3 <sup>c</sup>      | Pd(TFA) <sub>2</sub>               | DPEphos               | 40     | 28                                                    | 48                                     |
| 4                   | PdCl <sub>2</sub>                  | DPEphos               | 50     | -                                                     | 93                                     |
| 5                   | Pd(OAc) <sub>2</sub>               | DPEphos               | 50     | 4                                                     | 97                                     |
| 6                   | Pd(PPh <sub>3</sub> ) <sub>4</sub> | DPEphos               | 50     | -                                                     | 96                                     |
| 7                   | Pd(TFA) <sub>2</sub>               | PPh <sub>3</sub>      | 60     | 4                                                     | 90                                     |
| 8                   | Pd(TFA) <sub>2</sub>               | Zhedaphos             | 50     | 1                                                     | 100                                    |
| 9                   | Pd(TFA) <sub>2</sub>               | Sphos                 | 50     | 11                                                    | 88                                     |
| 10                  | Pd(TFA) <sub>2</sub>               | BINAP                 | 50     | 40                                                    | 44                                     |
| 11                  | Pd(TFA) <sub>2</sub>               | Xantphos              | 50     | 10                                                    | 70                                     |
| 12                  | Pd(TFA) <sub>2</sub>               | DPPB                  | 50     | 17                                                    | 66                                     |
| 13                  | Pd(TFA) <sub>2</sub>               | DPPP                  | 50     | 20                                                    | 67                                     |
| 14                  | Pd(TFA) <sub>2</sub>               | DPPF                  | 50     | 2                                                     | 94                                     |
| 15                  | Pd(TFA) <sub>2</sub>               | <b>L</b> <sub>1</sub> | 50     | 58                                                    | 46                                     |
| 16                  | Pd(TFA) <sub>2</sub>               | BIPHEP                | 50     | 5                                                     | 96                                     |
| 17 <sup>c,d</sup>   | Pd(TFA) <sub>2</sub>               | <b>L</b> <sub>1</sub> | 50     | 79                                                    | 18                                     |
| 18 <sup>c,d</sup>   | Pd(TFA) <sub>2</sub>               | <b>L</b> <sub>1</sub> | 60     | 95                                                    | trace                                  |
| 19 <sup>c,d,e</sup> | Pd(TFA) <sub>2</sub>               | <b>L</b> <sub>1</sub> | 60     | 77                                                    | trace                                  |
| 19 <sup>c,d,f</sup> | Pd(TFA) <sub>2</sub>               | <b>L</b> <sub>1</sub> | 60     | 99(95)                                                | -                                      |

<sup>a</sup> **Conditions B:** **1k** (0.4 mmol), [Pd] (4 mol%), ligand (6 mol%), MeOH (8.0 mmol), CO balloon, toluene (5.0 mL), 16 h. <sup>b</sup> Yield and recovery were determined by <sup>1</sup>H NMR analysis using CH<sub>2</sub>Br<sub>2</sub> as the internal standard, and the isolated yield is shown in the parentheses. <sup>c</sup> The reaction scale was 1.0 mmol. <sup>d</sup> The reaction time was extended to 24 h. <sup>e</sup> The reaction was carried out with 16.0 mmol of MeOH. <sup>f</sup> The reaction was carried out with 4.0 mmol of MeOH.

## Experimental details and analytical data

### 1. Synthesis of propargylic alcohols

#### (1) Preparation of 4-phenyl-2-(quinolin-3-yl)but-3-yn-2-ol (**1d**)<sup>1</sup> (hcf-1-185)

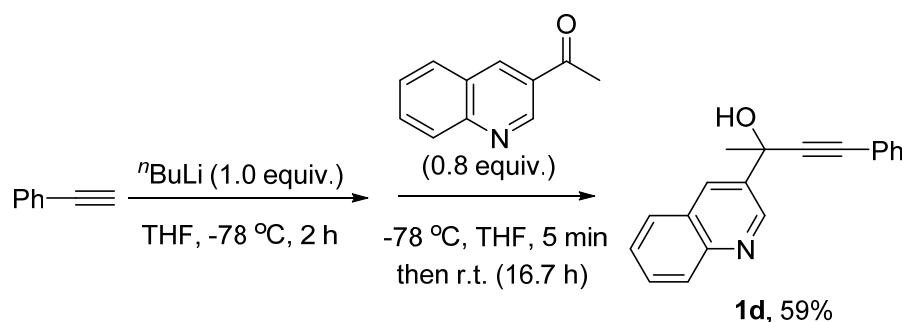

**Typical Procedure I:** To an oven-dried flask (100 mL) were added phenylacetylene (2.80 mL,  $d = 0.93$  g/mL, 2.6040 g, 25 mmol) and THF (50 mL). Then a solution of *n*-BuLi (2.5 M in hexane, 10 mL, 25 mmol) was added dropwise at -78 °C over 5 min. under argon. After being stirred at -78 °C for 2 h, a solution of 1-(quinolin-3-yl)ethan-1-one (3.5298 g, 20 mmol) in THF (10 mL) was added dropwise over 5 min. The resulting mixture was warmed up to room temperature, stirred for 16.7 h, and quenched with a saturated aqueous solution of NH<sub>4</sub>Cl (10 mL). After extraction with ethyl acetate (40 mL x 3), the organic layer was dried over anhydrous Na<sub>2</sub>SO<sub>4</sub>. After filtration and concentration under reduced pressure, the crude product was purified by column chromatography on silica gel to afford **1d** (3.3012 g, 59%) [eluent: dichloromethane/ethyl acetate = 20/1 (1050 mL), 10/1 (1100 mL), 1/1 (1000 mL)]: brown solid, m.p. 135.6-136.1 °C (petroleum ether/dichloromethane); <sup>1</sup>H NMR (400 MHz, CDCl<sub>3</sub>):  $\delta = 9.24$  (s, 1 H, Ar-H), 8.44 (s, 1 H, Ar-H), 8.12 (d,  $J = 8.0$  Hz, 1 H, Ar-H), 7.80 (d,  $J = 6.4$  Hz, 1 H, Ar-H), 7.73-7.59 (m, 1 H, Ar-H), 7.59-7.47 (m, 1 H, Ar-H), 7.47-7.38 (m, 2 H, Ar-H), 7.38-7.18 (m, 3 H, Ar-H), 4.48-3.88 (br, 1 H, OH), 1.95 (s, 3 H, CH<sub>3</sub>); <sup>13</sup>C NMR (100 MHz, CDCl<sub>3</sub>):  $\delta = 148.8, 147.0, 138.6, 131.7, 129.5, 128.7, 128.6, 128.3, 128.1, 127.4, 126.9, 122.1, 91.7, 85.6, 68.7, 33.2$ ; MS (70 eV, EI)  $m/z$  (%): 274 ( $M^+ + 1$ , 13.85), 273 ( $M^+$ , 60.93), 230 (100); IR (neat):  $\nu = 3111, 2990, 2931, 2813, 2232, 1574, 1494, 1421, 1177, 1093, 1056$  cm<sup>-1</sup>; Anal. Calcd. for C<sub>19</sub>H<sub>15</sub>NO: C 83.49, H 5.53, N 5.12; found C 83.49, H

5.60, N 5.20.

**(2) Preparation of 2-(pyridin-4-yl)-4-(*p*-tolyl)but-3-yn-2-ol (**1e**)<sup>1</sup> (hcf-1-146)**

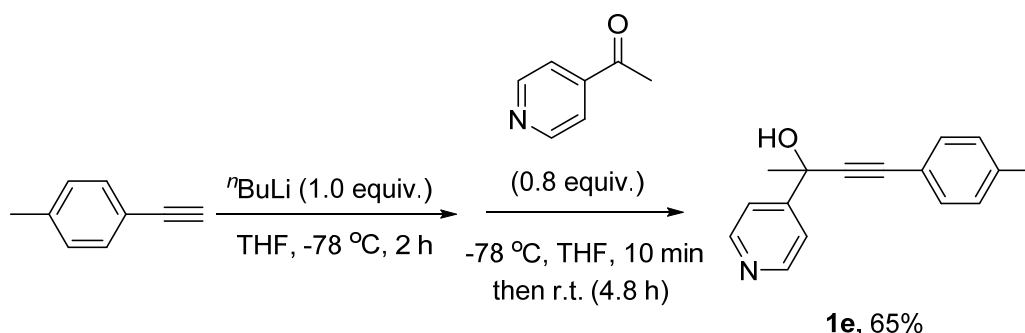

Following Typical Procedure I, the reaction of 4-methylphenylacetylene (1.4825 g, 12.5 mmol)/THF (30 mL), <sup>n</sup>BuLi (2.5 M in hexane, 5 mL, 12.5 mmol), and 1-(pyridin-4-yl)ethan-1-one (1.11 mL, d = 1.095 g/mL, 1.2154 g, 10 mmol)/THF (30 mL) afforded **1e** (1.5424 g, 65%): [eluent: petroleum ether/ethyl acetate = 3/1 (1000 mL), 1/1 (1000 mL), then recrystallization (petroleum ether/ethyl acetate)]: white solid, m.p. 151.2-151.9 °C (petroleum ether/ethyl acetate); <sup>1</sup>H NMR (400 MHz, CDCl<sub>3</sub>): δ = 8.59-8.51 (m, 2 H, Ar-H), 7.65-7.57 (m, 2 H, Ar-H), 7.33 (d, *J* = 7.6 Hz, 2 H, Ar-H), 7.12 (d, *J* = 8.0 Hz, 2 H, Ar-H), 4.35-4.05 (br, 1 H, OH), 2.35 (s, 3 H, CH<sub>3</sub>), 1.82 (s, 3 H, CH<sub>3</sub>); <sup>13</sup>C NMR (100 MHz, CDCl<sub>3</sub>): δ = 155.2, 149.5, 138.9, 131.6, 129.1, 120.1, 119.0, 90.6, 85.4, 69.2, 33.1, 21.5; MS (70 eV, EI) *m/z* (%): 238 (M<sup>+</sup>+1, 3.00), 237 (M<sup>+</sup>, 17.78), 222 (100); IR (neat): ν = 3154, 3036, 2976, 2918, 2857, 2235, 1600, 1422, 1142, 1001 cm<sup>-1</sup>; Anal. Calcd. for C<sub>16</sub>H<sub>15</sub>NO: C 80.98, H 6.37, N 5.90; found C 80.85, H 6.38, N 5.82.

**(3) Preparation of 2-(pyridin-4-yl)oct-3-yn-2-ol (**1f**)<sup>1</sup> (hcf-2-147)**

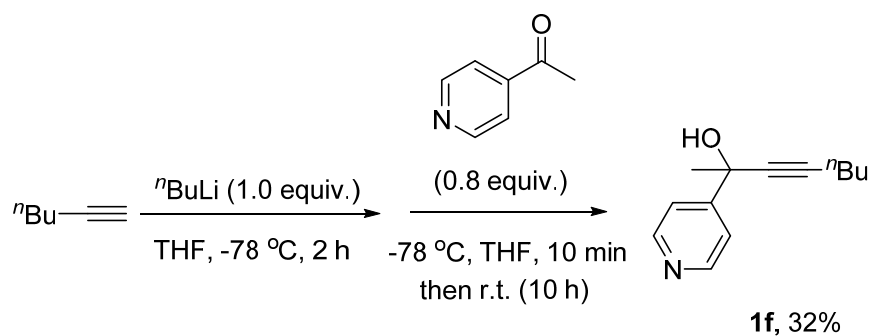

Following Typical Procedure I, the reaction of 1-hexyne (1.48 mL, d = 0.715

g/mL, 1.0582 g, 12.5 mmol)/THF (30 mL),  $n$ BuLi (2.5 M in hexane, 5 mL, 12.5 mmol), and 1-(pyridin-4-yl)ethan-1-one (1.11 mL,  $d = 1.095$  g/mL, 1.2045 g, 12.5 mmol)/THF (10 mL) afforded **1f** (0.6505 g, 32%) [eluent: petroleum ether/ethyl acetate = 3/1 (1000 mL), 1/1 (1000 mL), then recrystallization (petroleum ether/dichloromethane)]: yellow solid, m.p. 60.9-61.6 °C (petroleum ether/dichloromethane);  $^1\text{H NMR}$  (400 MHz,  $\text{CDCl}_3$ ):  $\delta = 8.51$ -8.38 (m, 2 H, Ar-H), 7.62-7.52 (m, 2 H, Ar-H), 5.69 (brs, 1 H, OH), 2.24 (t,  $J = 6.8$  Hz, 2 H,  $\text{CH}_2$ ), 1.71 (s, 3 H,  $\text{CH}_3$ ), 1.57-1.29 (m, 4 H, 2 x  $\text{CH}_2$ ), 0.89 (t,  $J = 7.0$  Hz, 3 H,  $\text{CH}_3$ );  $^{13}\text{C NMR}$  (100 MHz,  $\text{CDCl}_3$ ):  $\delta = 155.8$ , 149.2, 120.2, 85.9, 82.8, 68.7, 33.4, 30.6, 21.9, 18.3, 13.5; **MS** (70 eV, EI)  $m/z$  (%): 203 ( $\text{M}^+$ , 1.90), 188 (100); **IR** (neat):  $\nu = 3088$ , 3052, 2957, 2928, 2868, 2239, 1602, 1414, 1185, 1113, 1005  $\text{cm}^{-1}$ ; Anal. Calcd. for  $\text{C}_{13}\text{H}_{17}\text{NO}$ : C 76.81, H 8.43, N 6.89; found C 76.72, H 8.30, N 6.92.

#### (4) Preparation of 2-(pyridin-4-yl)dec-3-yn-2-ol (**1g**)<sup>1</sup> (hcf-2-11)

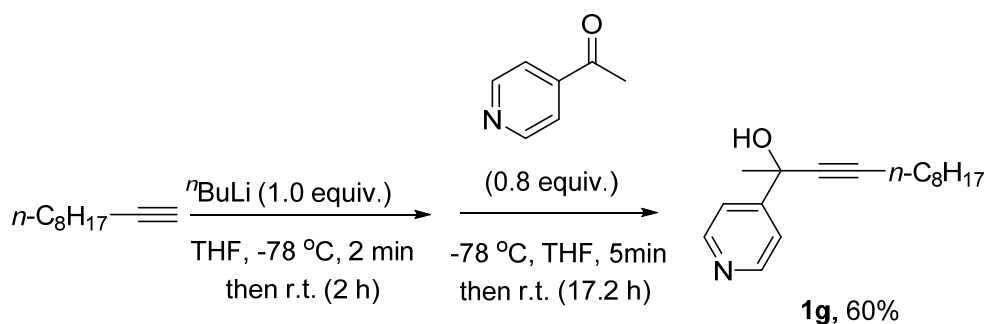

**Typical Procedure II:** To an oven-dried flask (100 mL) were added 1-decyne (2.30 mL,  $d = 0.767$  g/mL, 1.7641 g, 12.5 mmol) and THF (20 mL). Then a solution of  $n$ BuLi (2.5 M in hexane, 5 mL, 12.5 mmol) was added dropwise at  $-78$  °C over 2 min. under argon. Then the reaction mixture was warmed up to room temperature. After stirring at room temperature for 2 h, the mixture was cooled to  $-78$  °C, then a solution of 1-(quinolin-3-yl)ethan-1-one (3.5298 g, 20 mmol) in THF (10 mL) was added dropwise over 5 min. The resulting mixture was warmed up to room temperature, stirred for 17.2 h, and quenched with a saturated aqueous solution of  $\text{NH}_4\text{Cl}$  (10 mL). After extraction with ethyl acetate (40 mL x 3), the organic layer was dried over anhydrous  $\text{Na}_2\text{SO}_4$ . After filtration and concentration under reduced pressure, the crude product was purified by column chromatography on silica gel to afford **1g**



(1.5598 g, 60%) as an oil [eluent: dichloromethane/ethyl acetate = 5/1 (600 mL), 3/1 (400 mL), 1/1 (200 mL)]: **<sup>1</sup>H NMR** (400 MHz, CDCl<sub>3</sub>): δ = 8.55 (d, *J* = 6.0 Hz, 2 H, Ar-H), 7.54 (dd, *J*<sub>1</sub> = 4.8 Hz, *J*<sub>2</sub> = 1.60 Hz, 2 H, Ar-H), 3.29 (brs, 1 H, OH), 2.26 (t, *J* = 7.0 Hz, 2 H, CH<sub>2</sub>), 1.71 (s, 3 H, CH<sub>3</sub>), 1.59-1.47 (m, 2 H, CH<sub>2</sub>), 1.44-1.19 (m, 10 H, 5 x CH<sub>2</sub>), 0.88 (t, *J* = 6.8 Hz, 3 H, CH<sub>3</sub>); **<sup>13</sup>C NMR** (100 MHz, CDCl<sub>3</sub>): δ = 155.9, 149.2, 120.2, 86.0, 82.8, 68.6, 33.3, 31.7, 29.1, 29.0, 28.8, 28.5, 22.6, 18.6, 14.0; **MS** (70 eV, EI) *m/z* (%): 259 (M<sup>+</sup>, 2.46), 244 (100); **IR** (neat): ν = 3151, 2924, 2854, 2243, 1600, 1463, 1413, 1104, 1064, 1004 cm<sup>-1</sup>; **HRMS** calcd for C<sub>17</sub>H<sub>25</sub>NO [M<sup>+</sup>]: 259.1936, found: 259.1934.

**(5) Preparation of 1-phenyl-3-(pyridin-4-yl)pent-1-yn-3-ol (1h)<sup>1</sup> (hcf-1-164)**

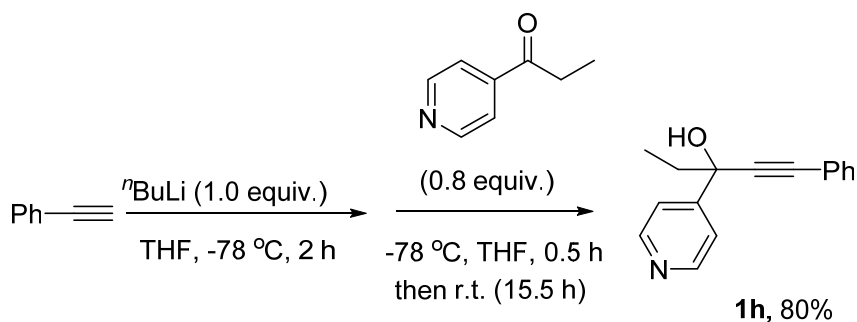

**Following Typical Procedure I**, the reaction of phenylacetylene (5.60 mL, d = 0.93 g/mL, 5.2080 g, 50 mmol)/THF (50 mL), <sup>n</sup>BuLi (2.5 M in hexane, 20 mL, 50 mmol), and 1-(pyridin-4-yl)propan-1-one (5.33 mL, d = 1.034 g/mL, 5.5112 g, 40 mmol)/THF (20 mL) afforded **1h** (7.6483 g, 80%) [recrystallization (petroleum ether/dichloromethane)]: brown solid: m.p. 108.6-110.1 °C (petroleum ether/dichloromethane); **<sup>1</sup>H NMR** (400 MHz, CDCl<sub>3</sub>): δ = 8.49 (d, *J* = 2.4 Hz, 2 H, Ar-H), 7.65-7.52 (m, 2 H, Ar-H), 7.48-7.38 (m, 2 H, Ar-H), 7.38-7.27 (m, 3 H, Ar-H), 5.08 (brs, 1 H, OH), 2.11-1.89 (m, 2 H, CH<sub>2</sub>), 1.02 (t, *J* = 7.4 Hz, 3 H, CH<sub>3</sub>); **<sup>13</sup>C NMR** (100 MHz, CDCl<sub>3</sub>): δ = 154.4, 149.1, 131.7, 128.6, 128.3, 122.2, 120.8, 90.4, 86.2, 72.8, 38.2, 8.8; **MS** (70 eV, EI) *m/z* (%): 237 (M<sup>+</sup>, 1.61), 208 (100); **IR** (neat): ν = 3128, 3056, 2969, 2931, 2872, 2223, 1600, 1453, 1429, 1130, 1070, 1002 cm<sup>-1</sup>; Anal. Calcd. for C<sub>16</sub>H<sub>15</sub>NO: C 80.98, H 6.37, N 5.90; found C 80.92, H 6.51, N 6.09.

**(6) Preparation of 1-phenyl-1-(pyridin-4-yl)hept-2-yn-1-ol (1i)<sup>1</sup> (hcf-1-188)**

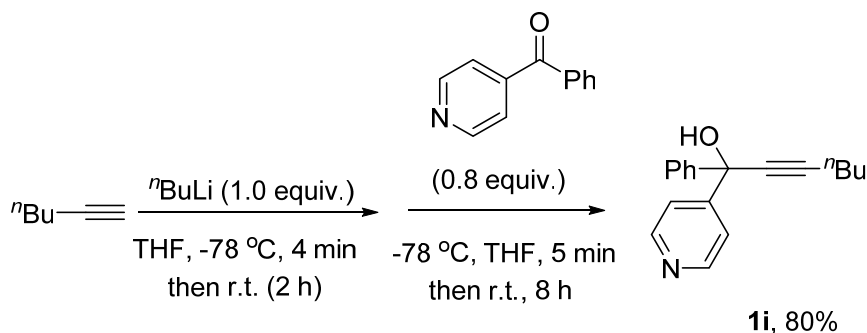

**Following Typical Procedure II**, the reaction of 1-hexyne (2.96 mL,  $d = 0.715$  g/mL, 2.1164 g, 25 mmol)/THF (50 mL),  $n$ BuLi (2.5 M in hexane, 10 mL, 25 mmol), and phenyl(pyridin-4-yl)methanone (3.7020 g, 20 mmol)/THF (10 mL) afforded **1i** (4.2988 g, 80%) [recrystallization (petroleum ether/ethyl acetate)]: white solid, m.p. 123.5-124.0 °C (petroleum ether/ethyl acetate);  $^1\text{H NMR}$  (400 MHz,  $\text{CDCl}_3$ ):  $\delta = 8.45$  (d,  $J = 6.4$  Hz, 2 H, Ar-H), 7.59 (d,  $J = 6.8$  Hz, 2 H, Ar-H), 7.50 (d,  $J = 6.0$  Hz, 2 H, Ar-H), 7.38-7.21 (m, 3 H, Ar-H), 4.18 (s, 1 H, OH), 2.32 (t,  $J = 7.0$  Hz, 2 H,  $\text{CH}_2$ ), 1.61-1.49 (m, 2 H,  $\text{CH}_2$ ), 1.48-1.35 (m, 2 H,  $\text{CH}_2$ ), 0.91 (t,  $J = 7.2$  Hz, 3 H,  $\text{CH}_3$ );  $^{13}\text{C NMR}$  (100 MHz,  $\text{CDCl}_3$ ):  $\delta = 155.0, 149.1, 144.5, 128.3, 127.8, 125.9, 120.8, 88.7, 82.0, 73.2, 30.5, 21.9, 18.5, 13.5$ ; **MS** (70 eV, EI)  $m/z$  (%): 266 ( $\text{M}^+ + 1$ , 2.87), 265 ( $\text{M}^+$ , 9.93), 208 (100); **IR** (neat):  $\nu = 3081, 3052, 2961, 2930, 2873, 2830, 2240, 1599, 1449, 1145, 1042, 1003$   $\text{cm}^{-1}$ ; Anal. Calcd. for  $\text{C}_{18}\text{H}_{19}\text{NO}$ : C 81.47, H 7.22, N 5.28; found C 81.40, H 7.42, N 5.27.

**(7) Preparation of 2-(4-nitrophenyl)dec-3-yn-2-ol (**1j**)<sup>1</sup> (hcf-2-52)**

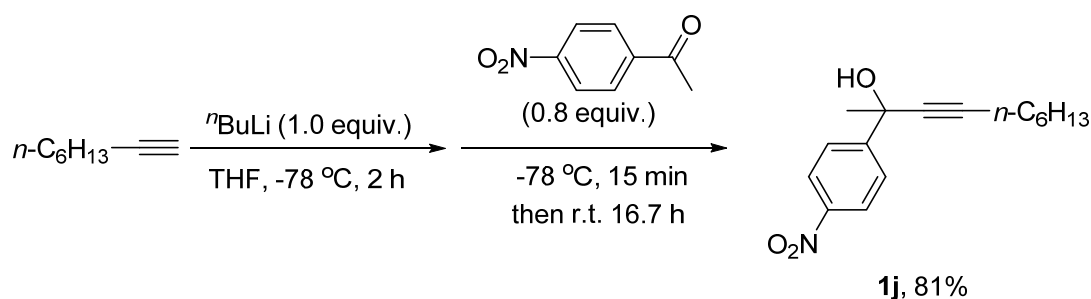

**Following Typical Procedure I**, the reaction of 1-octyne (3.0 mL,  $d = 0.746$  g/mL, 2.2380 g, 20 mmol)/THF (20 mL),  $n$ BuLi (2.5 M in hexane, 8.0 mL, 20 mmol), and 1-(4-nitrophenyl)ethan-1-one (2.6950 g, 16 mmol)/THF (10 mL) afforded **1j** (2.4635 g, 81%) as a yellow oil [eluent: petroleum ether 200 mL, petroleum ether

/ethyl acetate = 20/1 (800 mL)]: **<sup>1</sup>H NMR** (400 MHz, CDCl<sub>3</sub>): δ = 8.20 (d, *J* = 8.8 Hz, 2 H, Ar-H), 7.82 (d, *J* = 8.8 Hz, 2 H, Ar-H), 2.46 (s, 1 H, OH), 2.27 (t, *J* = 7.0 Hz, 2 H, CH<sub>2</sub>), 1.75 (s, 3 H, CH<sub>3</sub>), 1.59-1.49 (m, 2 H, CH<sub>2</sub>), 1.45-1.24 (m, 6 H, 3 x CH<sub>2</sub>), 0.90 (t, *J* = 6.8 Hz, 3 H, CH<sub>3</sub>); **<sup>13</sup>C NMR** (100 MHz, CDCl<sub>3</sub>): δ = 153.3, 147.2, 126.0, 123.5, 86.9, 82.6, 69.6, 33.8, 31.2, 28.5, 28.4, 22.5, 18.6, 14.0; **MS** (ESI) *m/z*: 298 (M+Na<sup>+</sup>), 258 (M-OH)<sup>+</sup>; **IR** (neat): ν = 3415, 2929, 2858, 2244, 1603, 1518, 1343, 1087, 1014 cm<sup>-1</sup>; **HRMS** calcd for C<sub>16</sub>H<sub>22</sub>NO<sub>3</sub> [M+H<sup>+</sup>]: 276.1594, found: 276.1593.

**(8) Preparation of 1-(4-bromophenyl)-3-methyloct-1-yn-3-ol (11)<sup>1</sup> (hcf-2-56)**

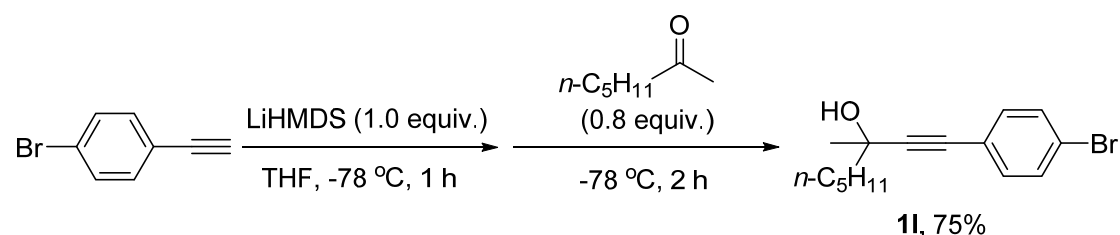

**Following Typical Procedure I**, the reaction of 4-bromophenylacetylene (3.7341 g, 20 mmol)/THF (30 mL), LiHMDS (1.0 M in tetrahydrofuran, 20 mL, 20 mmol), and heptan-2-one (2.25 mL, d = 0.82 g/mL, 1.8450 g, 16 mmol)/THF (10 mL) afforded **11** (3.5417 g, 75%) as a yellow oil [eluent: petroleum ether (200 mL), petroleum ether /ethyl acetate = 20/1 (1050 mL)]: **<sup>1</sup>H NMR** (400 MHz, CDCl<sub>3</sub>): δ = 7.43 (d, *J* = 8.4 Hz, 2 H, Ar-H), 7.27 (d, *J* = 8.4 Hz, 2 H, Ar-H), 2.03 (s, 1 H, OH), 1.80-1.67 (m, 2 H, CH<sub>2</sub>), 1.63-1.48 (m, 5 H, CH<sub>2</sub> and CH<sub>3</sub>), 1.43-1.27 (m, 4 H, 2 x CH<sub>2</sub>), 0.91 (t, *J* = 6.8 Hz, 3 H, CH<sub>3</sub>); **<sup>13</sup>C NMR** (100 MHz, CDCl<sub>3</sub>): δ = 133.0, 131.5, 122.4, 121.7, 94.1, 82.2, 68.6, 43.6, 31.8, 29.7, 24.4, 22.5, 14.0; **MS** (70 eV, EI) *m/z* (%): 296 (M<sup>+</sup> (<sup>81</sup>Br), 4.75), 294 (M<sup>+</sup> (<sup>79</sup>Br), 5.02), 223 (100); **IR** (neat): ν = 3349, 2954, 2931, 2860, 1485, 1462, 1370, 1128, 1070, 1010 cm<sup>-1</sup>; **HRMS** calcd for C<sub>15</sub>H<sub>19</sub><sup>79</sup>BrO [M<sup>+</sup>]: 294.0619, found: 294.0617.

**(9) Preparation of 1-(methoxycarbonylphenyl)-3-methyloct-1-yn-3-ol (1y)<sup>1</sup> (hcf-3-138)**

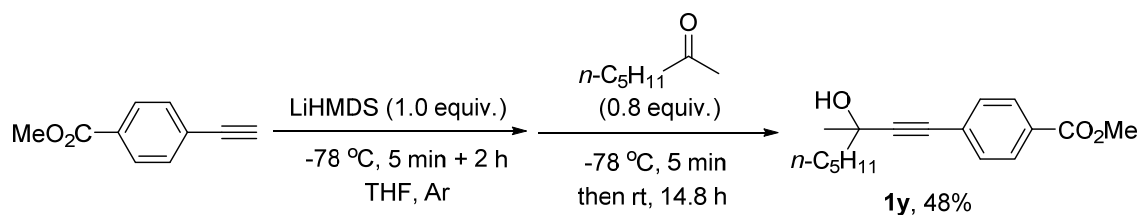

Following **Typical Procedure I**, the reaction of methyl 4-ethynylbenzoate (3.3029 g, 20 mmol)/THF (30 mL), LiHMDS (1.3 M in tetrahydrofuran, 15.4 mL, 20 mmol), and heptan-2-one (2.3 mL, *d* = 0.82 g/mL, 1.886 g, 16 mmol)/THF (10 mL) afforded **1y** (2.1314 g, 48%) as a yellow oil [eluent: petroleum ether/ethyl acetate = 50/1 (510 mL), 10/1 (1100 mL), 5/1 (600 mL)]: **<sup>1</sup>H NMR** (400 MHz, CDCl<sub>3</sub>):  $\delta$  = 7.97 (d, *J* = 8.4 Hz, 2 H, Ar-H), 7.46 (d, *J* = 8.8 Hz, 2 H, Ar-H), 3.92 (s, 3 H, CO<sub>2</sub>Me), 2.18-2.02 (m, 1 H, OH), 1.82-1.68 (m, 2 H, CH<sub>2</sub>), 1.67-1.46 (m, 5 H, CH<sub>2</sub> and CH<sub>3</sub>), 1.43-1.26 (m, 4 H, 2 x CH<sub>2</sub>), 0.92 (t, *J* = 6.8 Hz, 3 H, CH<sub>3</sub>); **<sup>13</sup>C NMR** (100 MHz, CDCl<sub>3</sub>):  $\delta$  = 166.5, 131.6, 129.5, 129.4, 127.6, 96.1, 82.5, 68.7, 52.2, 43.6, 31.9, 29.7, 24.4, 22.5, 14.0; **MS** (70 eV, EI) *m/z* (%): 274 (M<sup>+</sup>, 1.53), 203 (100); **IR** (neat):  $\nu$  = 3436, 2953, 2934, 2870, 1724, , 1605, 1436, 1273, 1175, 1107 cm<sup>-1</sup>; **HRMS** calcd for C<sub>17</sub>H<sub>22</sub>O<sub>3</sub> [M]<sup>+</sup>: 274.1569, found: 274.1573.

**(10) Preparation of 1-(4-methylphenyl)-3-methyloct-1-yn-3-ol (1z-A)<sup>1</sup> (hcf-3-139)**

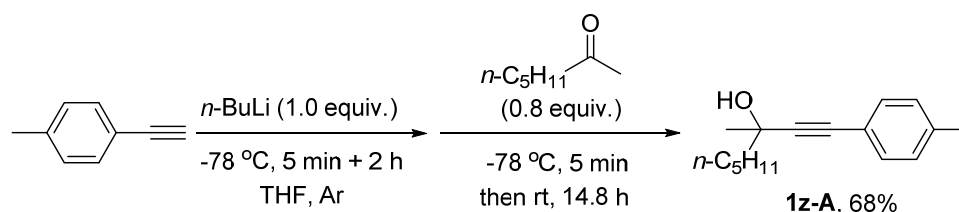

Following **Typical Procedure I**, the reaction of 4-methylphenylacetylene (2.6 mL, *d* = 0.916 g/mL, 2.3816 g, 20 mmol)/THF (30 mL), <sup>*n*</sup>BuLi (2.5 M in tetrahydrofuran, 8 mL, 20 mmol), and heptan-2-one (2.3 mL, *d* = 0.82 g/mL, 1.886 g, 16 mmol)/THF (10 mL) afforded **1z-A** (2.5351 g, 68%) as a yellow oil [eluent: petroleum ether/ethyl acetate = 50/1 (510 mL), 20/1 (1050 mL), 10/1 (550 mL)]: **<sup>1</sup>H NMR** (400 MHz, CDCl<sub>3</sub>):  $\delta$  = 7.30 (d, *J* = 8.0 Hz, 2 H, Ar-H), 7.10 (d, *J* = 8.0 Hz, 2 H, Ar-H), 2.34 (s, 3 H, CH<sub>3</sub>), 2.03-1.96 (m, 1 H, OH), 1.79-1.66 (m, 2 H, CH<sub>2</sub>), 1.62-1.46 (m, 5 H, CH<sub>2</sub>

and CH<sub>3</sub>), 1.41-1.26 (m, 4 H, 2 x CH<sub>2</sub>), 0.91 (t, *J* = 7.0 Hz, 3 H, CH<sub>3</sub>); <sup>13</sup>C NMR (100 MHz, CDCl<sub>3</sub>): δ = 138.3, 131.5, 129.0, 119.7, 92.3, 83.3, 68.7, 43.8, 31.9, 29.9, 24.4, 22.6, 21.4, 14.0; MS (70 eV, EI) *m/z* (%): 231 (M<sup>+</sup>+1, 1.62), 230 (M<sup>+</sup>, 3.97), 159 (100); IR (neat): ν = 3357, 2954, 2932, 2861, 1509, 1456, 1370, 1129, 1040 cm<sup>-1</sup>; HRMS calcd for C<sub>16</sub>H<sub>22</sub>O [M]<sup>+</sup>: 230.1665, found: 230.1665.

**(11) Preparation of 1-(4-methoxyphenyl)-3-methyloct-1-yn-3-ol (1z-B)**<sup>1</sup>  
(hcf-3-140)

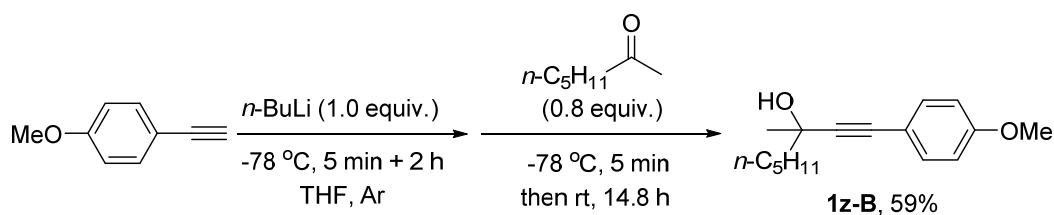

Following Typical Procedure I, the reaction of 4-methoxyphenylacetylene (2.6 mL, d = 1.019 g/mL, 2.6494 g, 20 mmol)/THF (30 mL), <sup>n</sup>BuLi (2.5 M in tetrahydrofuran, 8 mL, 20 mmol), and heptan-2-one (2.3 mL, d = 0.82 g/mL, 1.886 g, 16 mmol)/THF (10 mL) afforded **1z-B** (2.3524 g, 59%) as a yellow oil [eluent: petroleum ether/ethyl acetate = 50/1 (510 mL), 20/1 (1050 mL), 10/1 (550 mL)]: <sup>1</sup>H NMR (400 MHz, CDCl<sub>3</sub>): δ = 7.35 (d, *J* = 8.8 Hz, 2 H, Ar-H), 6.82 (d, *J* = 8.8 Hz, 2 H, Ar-H), 3.80 (s, 3 H, OCH<sub>3</sub>), 2.07-1.97 (m, 1 H, OH), 1.79-1.65 (m, 2 H, CH<sub>2</sub>), 1.64-1.46 (m, 5 H, CH<sub>2</sub> and CH<sub>3</sub>), 1.43-1.25 (m, 4 H, 2 x CH<sub>2</sub>), 0.91 (t, *J* = 7.0 Hz, 3 H, CH<sub>3</sub>); <sup>13</sup>C NMR (100 MHz, CDCl<sub>3</sub>): δ = 159.5, 133.1, 114.9, 113.9, 91.6, 83.1, 68.7, 55.3, 43.8, 31.9, 29.9, 24.4, 22.6, 14.0; MS (70 eV, EI) *m/z* (%): 246 (M<sup>+</sup>, 11.93), 175 (100); IR (neat): ν = 3393, 2955, 2933, 2870, 2227, 1606, 1509, 1465, 1288, 1245, 1031 cm<sup>-1</sup>; HRMS calcd for C<sub>16</sub>H<sub>22</sub>O<sub>2</sub> [M]<sup>+</sup>: 246.1614, found: 246.1621.

**(12) Preparation of 4-methyltetradec-5-yn-4-ol (1n)**<sup>1</sup> (zwl-11-164)

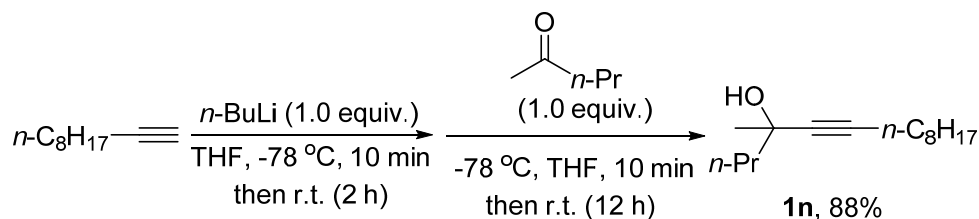

Following Typical Procedure II, the reaction of 1-decyne (4.50 mL, d = 0.766

g/mL, 3.4470 g, 25 mmol) in THF (30 mL), <sup>n</sup>BuLi (2.5 M in hexane, 10 mL, 25 mmol), and 2-pentanone (2.70 mL, d = 0.809 g/mL, 2.1843 g, 25 mmol) in THF (20 mL) afforded **1n** (4.1919 g, 88%) as an oil [eluent: petroleum ether/ethyl acetate = 10/1]: <sup>1</sup>H NMR (400 MHz, CDCl<sub>3</sub>): δ = 2.18 (t, *J* = 7.0 Hz, 2 H, CH<sub>2</sub>), 1.97-1.85 (m, 1 H, OH), 1.65-1.57 (m, 2 H, CH<sub>2</sub>), 1.57-1.42 (m, 7 H, CH<sub>3</sub> and 2 x CH<sub>2</sub>), 1.42-1.20 (m, 10 H, 5 x CH<sub>2</sub>), 0.96 (t, *J* = 7.2 Hz, 3 H, CH<sub>3</sub>), 0.88 (t, *J* = 6.6 Hz, 3 H, CH<sub>3</sub>); <sup>13</sup>C NMR (100 MHz, CDCl<sub>3</sub>): δ = 84.1, 83.7, 68.3, 46.2, 31.8, 30.1, 29.2, 29.0, 28.8, 28.7, 22.6, 18.6, 18.1, 14.2, 14.1; MS (ESI) *m/z*: 239 (M+MeOH-OH)<sup>+</sup>, 225 (M+H)<sup>+</sup>, 207 (M-OH)<sup>+</sup>; IR (neat): ν = 3375, 2926, 2856, 2236, 1461, 1370, 1131, 1051, 1012 cm<sup>-1</sup>; HRMS calcd for C<sub>15</sub>H<sub>29</sub>O [M+H]<sup>+</sup>: 225.2213, found: 225.2212.

**(13) Preparation of 5-methyldec-1-en-6-yn-5-ol (1o)<sup>1</sup> (zwl-11-166)**

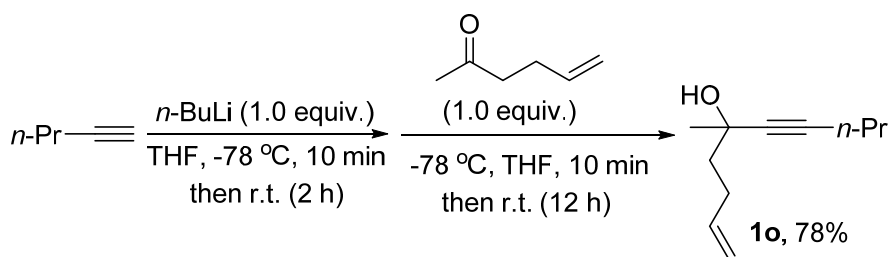

Following Typical Procedure II, the reaction of 1-pentyne (2.50 mL, d = 0.691 g/mL, 1.7275 g, 25 mmol) in THF (30 mL), <sup>n</sup>BuLi (2.5 M in hexane, 10 mL, 25 mmol), and 5-hexen-2-one (2.90 mL, d = 0.847 g/mL, 2.4563 g, 25 mmol) in THF (20 mL) afforded **1o** (3.2455 g, 78%) as an oil [eluent: petroleum ether/ethyl acetate = 10/1]: <sup>1</sup>H NMR (400 MHz, CDCl<sub>3</sub>): δ = 5.94-5.81 (m, 1 H, =CH), 5.07 (dd, *J*<sub>1</sub> = 17.2 Hz, *J*<sub>2</sub> = 1.6 Hz, 1 H, =CH<sub>2</sub>), 4.97 (d, *J* = 10.4 Hz, 1 H, =CH<sub>2</sub>), 2.39-2.20 (m, 2 H, CH<sub>2</sub>), 2.18 (t, *J* = 7.0 Hz, 2 H, CH<sub>2</sub>), 2.07-2.00 (m, 1 H, OH), 1.80-1.65 (m, 2 H, CH<sub>2</sub>), 1.57-1.48 (m, 2 H, CH<sub>2</sub>), 1.47 (s, 3 H, CH<sub>3</sub>), 0.98 (t, *J* = 7.4 Hz, 3 H, CH<sub>3</sub>); <sup>13</sup>C NMR (100 MHz, CDCl<sub>3</sub>): δ = 138.6, 114.6, 84.0, 83.8, 68.2, 42.9, 30.3, 29.3, 22.1, 20.5, 13.4; MS (ESI) *m/z*: 181 (M+MeOH-OH)<sup>+</sup>, 149 (M-OH)<sup>+</sup>; IR (neat): ν = 3362, 2967, 2934, 2872, 2239, 1641, 1453, 1370, 1335, 1125, 1080 cm<sup>-1</sup>; HRMS calcd for C<sub>11</sub>H<sub>19</sub>O [M+H]<sup>+</sup>: 167.1430, found: 167.1430.

**(14) Preparation of 10-chloro-4-methyldec-5-yn-4-ol (1p)<sup>1</sup> (zwl-11-185)**

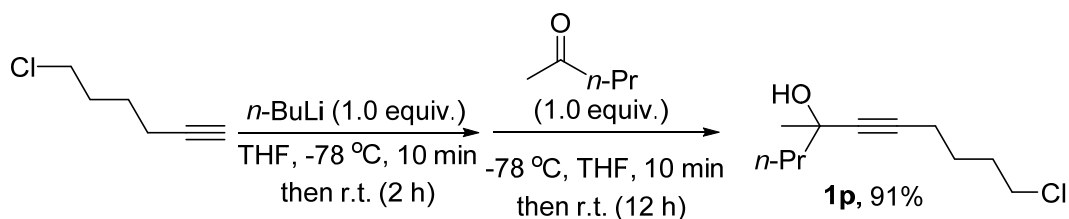

Following **Typical Procedure II**, the reaction of 6-chloro-1-hexyne (3.10 mL,  $d = 0.962$  g/mL, 2.9822 g, 25 mmol) in THF (30 mL),  $n$ BuLi (2.5 M in hexane, 10 mL, 25 mmol), and 2-pentanone (2.70 mL,  $d = 0.809$  g/mL, 2.1843 g, 25 mmol) in THF (20 mL) afforded **1p** (4.6781 g, 91%) as an oil [eluent: petroleum ether/ethyl acetate = 10/1]:  **$^1\text{H NMR}$**  (400 MHz,  $\text{CDCl}_3$ ):  $\delta = 3.57$  (t,  $J = 6.6$  Hz, 2 H,  $\text{CH}_2$ ), 2.24 (t,  $J = 7.0$  Hz, 2 H,  $\text{CH}_2$ ), 2.16-1.98 (m, 1 H, OH), 1.95-1.81 (m, 2 H,  $\text{CH}_2$ ), 1.72-1.38 (m, 9 H,  $\text{CH}_3$  and 3 x  $\text{CH}_2$ ), 0.95 (t,  $J = 7.2$  Hz, 3 H,  $\text{CH}_3$ );  **$^{13}\text{C NMR}$**  (100 MHz,  $\text{CDCl}_3$ ):  $\delta = 84.8, 82.5, 68.1, 46.1, 44.4, 31.5, 30.0, 25.7, 18.0, 17.8, 14.1$ ; **MS** (ESI)  $m/z$ : 219 ( $\text{M}^{(37}\text{Cl})+\text{MeOH-OH}^+$ ), 217 ( $\text{M}^{(35}\text{Cl})+\text{MeOH-OH}^+$ ); **IR** (neat):  $\nu = 3419, 2957, 2934, 2872, 1455, 1369, 1333, 1316, 1131, 1051, 1011$   $\text{cm}^{-1}$ ; **HRMS** calcd for  $\text{C}_{11}\text{H}_{19}\text{O}^{35}\text{Cl}$  [ $\text{M}^+$ ]: 202.1124, found: 202.1121.

**(15) Preparation of 3-methyl-1-phenyltetradec-1-yn-3-ol (**1u**)<sup>1</sup> (hcf-2-71)**

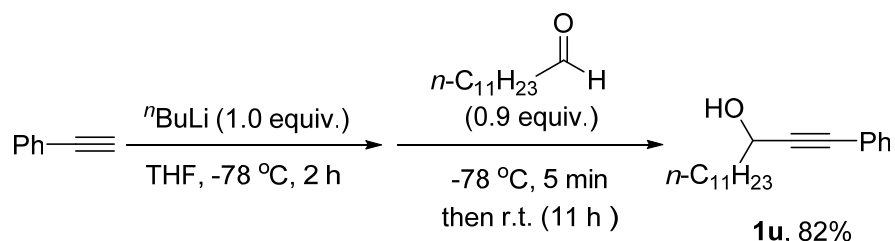

Following **Typical Procedure I**, the reaction of phenylacetylene (2.24 mL,  $d = 0.93$  g/mL, 2.0832 g, 20 mmol)/THF (20 mL),  $n$ BuLi (2.5 M in hexane, 8.0 mL, 20 mmol), and dodecanal (4.1 mL,  $d = 0.831$  g/mL, 3.4071 g, 18 mmol)/THF (10 mL) afforded **1u** (4.2117 g, 82%) as a yellow oil [eluent: petroleum ether/ethyl acetate = 20/1 (420 mL), 10/1 (880 mL)]:  **$^1\text{H NMR}$**  (400 MHz,  $\text{CDCl}_3$ ):  $\delta = 7.48$ -7.37 (m, 2 H, Ar-H), 7.35-7.25 (m, 3 H, Ar-H), 4.59 (q,  $J = 6.0$  Hz, 1 H, CH), 2.23-2.10 (m, 1 H, OH), 1.86-1.71 (m, 2 H,  $\text{CH}_2$ ), 1.58-1.42 (m, 2 H,  $\text{CH}_2$ ), 1.42-1.18 (m, 16 H, 8 x  $\text{CH}_2$ ), 0.88 (t,  $J = 7.0$  Hz, 3 H,  $\text{CH}_3$ );  **$^{13}\text{C NMR}$**  (100 MHz,  $\text{CDCl}_3$ ):  $\delta = 131.6, 128.3, 128.2, 122.7, 90.3, 84.7, 62.9, 37.9, 31.9, 29.61, 29.60, 29.54, 29.51, 29.31, 29.26, 25.2, 22.6,$

14.1; **MS** (EI 70 ev  $m/z$ ) (%): 286 ( $M^+$ , 2.65), 131 (100); **IR** (neat):  $\nu = 3349, 2956, 2916, 2847, 1597, 1487, 1464, 1126, 1058, 1037 \text{ cm}^{-1}$ ; **HRMS** calcd for  $C_{20}H_{30}O$   $[M]^+$ : 286.2297, found: 286.2298.

**(16) Preparation of 1-(4-bromophenyl)tetradec-1-yn-3-ol (**1x**)<sup>1</sup> (hcf-2-109)**

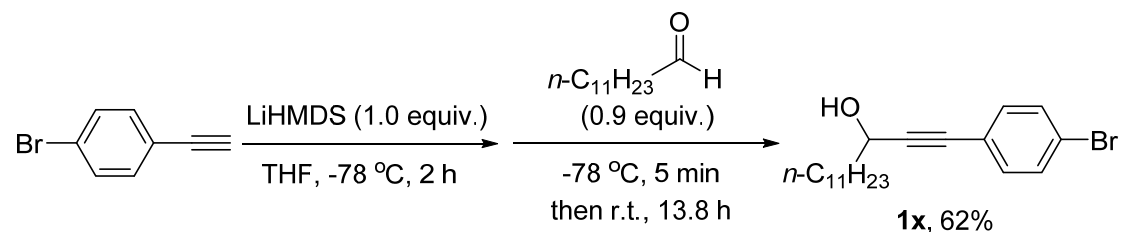

**Following Typical Procedure I**, the reaction of 4-bromophenylacetylene (3.7330 g, 20 mmol)/THF (20 mL), LiHMDS (1.0 M in tetrahydrofuran, 20 mL, 20 mmol), and dodecanal (4.1 mL,  $d = 0.831 \text{ g/mL}$ , 3.4071 g, 18 mmol)/THF (10 mL) afforded **1x** (4.0665 g, 62%) [eluent: petroleum ether/ethyl ether/DCM = 50/1/1 (520 mL), 20/1/1 (550 mL), 10/1/1 (600 mL)]: white solid, m.p. 40.2-40.9 °C (petroleum ether/ethyl acetate); **<sup>1</sup>H NMR** (400 MHz,  $CDCl_3$ ):  $\delta = 7.44$  (d,  $J = 8.8 \text{ Hz}$ , 2 H, Ar-H), 7.28 (d,  $J = 8.4 \text{ Hz}$ , 2 H, Ar-H), 4.58 (q,  $J = 6.3 \text{ Hz}$ , 1 H, CH), 1.87 (d,  $J = 5.2 \text{ Hz}$ , 1 H, OH), 1.84-1.72 (m, 2 H,  $CH_2$ ), 1.56-1.44 (m, 2 H,  $CH_2$ ), 1.41-1.18 (m, 16 H, 8 x  $CH_2$ ), 0.88 (t,  $J = 7.0 \text{ Hz}$ , 3 H,  $CH_3$ ); **<sup>13</sup>C NMR** (100 MHz,  $CDCl_3$ ):  $\delta = 133.1, 131.5, 122.6, 121.6, 91.4, 83.7, 63.0, 37.8, 31.9, 29.62, 29.60, 29.54, 29.51, 29.3, 29.2, 25.2, 22.7, 14.1$ ; **MS** (EI 70 ev  $m/z$ ) (%): 366 ( $M^+$  ( $^{81}Br$ ), 5.85), 364 ( $M^+$  ( $^{79}Br$ ), 5.64), 211 (100); **IR** (neat):  $\nu = 3364, 2951, 2914, 2847, 1670, 1484, 1465, 1257, 1057, 1012 \text{ cm}^{-1}$ ; Anal. Calcd. for  $C_{20}H_{29}^{79}BrO$ : C 65.75, H 8.00; found C 65.79, H 8.06.

**2. Synthesis of optically active propargylic alcohols**

**(1) Preparation of (*S*)-3-methyl-1-phenyltetradec-1-yn-3-ol ((*S*)-**1u**)<sup>2</sup> (hcf-2-93)**

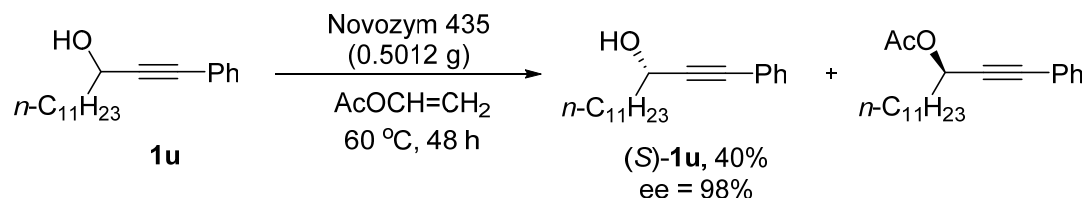

**Typical Procedure III:** To a flask (100 mL) were added **1u** (2.0295 g, 7 mmol) and vinyl acetate (25 mL). Then Novozym 435 (0.5012 g)/vinyl acetate (25 mL) was added. The resulting mixture was stirred at 60 °C for 48 h. After that, the resulting



mixture was filtered through a funnel and concentrated. The residue was purified by column chromatography on silica gel to afford (*S*)-**1u** (0.8118 g, 40%) as a yellow oil [eluent: petroleum ether/ethyl acetate = 50/1 (510 mL), 10/1 (550 mL)]: 98% ee (HPLC conditions: PA-2 column, hexane/*i*-PrOH = 95/5, 0.7 mL/min,  $\lambda$  = 214 nm,  $t_R$  (minor) = 8.5 min,  $t_R$  (major) = 9.2 min);  $[\alpha]_D^{20}$  = +7.95 ( $c$  = 1.02, CHCl<sub>3</sub>); <sup>1</sup>H NMR (400 MHz, CDCl<sub>3</sub>):  $\delta$  = 7.48-7.38 (m, 2 H, Ar-H), 7.36-7.28 (m, 3 H, Ar-H), 4.60 (q,  $J$  = 6.3 Hz, 1 H, CH), 1.89-1.73 (m, 3 H, OH and CH<sub>2</sub>), 1.60-1.45 (m, 2 H, CH<sub>2</sub>), 1.42-1.18 (m, 16 H, 8 x CH<sub>2</sub>), 0.88 (t,  $J$  = 7.0 Hz, 3 H, CH<sub>3</sub>); <sup>13</sup>C NMR (100 MHz, CDCl<sub>3</sub>):  $\delta$  = 131.7, 128.3, 128.2, 122.7, 90.2, 84.8, 63.0, 37.9, 31.9, 29.64, 29.61, 29.56, 29.5, 29.33, 29.28, 25.2, 22.7, 14.1; MS (EI 70 ev  $m/z$ ) (%): 286 (M<sup>+</sup>, 2.27), 131 (100); IR (neat):  $\nu$  = 3348, 2956, 2916, 2848, 1597, 1487, 1464, 1125, 1058, 1037 cm<sup>-1</sup>; HRMS calcd for C<sub>20</sub>H<sub>30</sub>O [M]<sup>+</sup>: 286.2297, found: 286.2296.

## (2) Preparation of (*S*)-1-(4-bromophenyl)tetradec-1-yn-3-ol ((*S*)-**1x**)<sup>2</sup> (hcf-2-111)

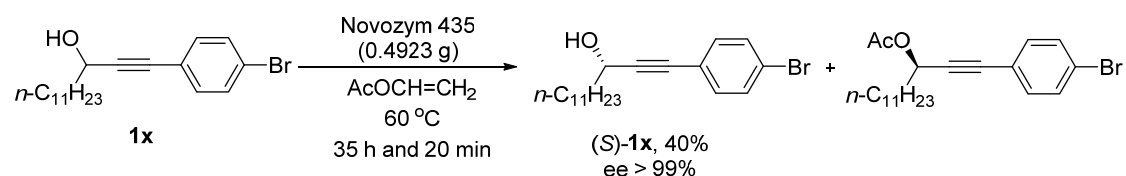

Following **Typical Procedure III**, the reaction of **1x** (2.1922 g, 6 mmol) and Novozym 435 (0.4923 g)/vinyl acetate (50 mL) afforded (*S*)-**1x** (0.8767 g, 40%) [eluent: petroleum ether/ethyl acetate = 50/1 (510 mL), 10/1 (550 mL)]: white solid, m.p. 40.0-40.8 °C (petroleum ether/ethyl acetate); >99% ee (HPLC conditions: PA-2 column, hexane/*i*-PrOH = 100/1, 0.7 mL/min,  $\lambda$  = 214 nm,  $t_R$  (major) = 38.8 min);  $[\alpha]_D^{20}$  = +8.2 ( $c$  = 1.00, CHCl<sub>3</sub>); <sup>1</sup>H NMR (400 MHz, CDCl<sub>3</sub>):  $\delta$  = 7.43 (d,  $J$  = 8.8 Hz, 2 H, Ar-H), 7.28 (d,  $J$  = 8.4 Hz, 2 H, Ar-H), 4.57 (q,  $J$  = 6.1 Hz, 1 H, CH), 2.04-1.94 (m, 1 H, OH), 1.86-1.72 (m, 2 H, CH<sub>2</sub>), 1.56-1.43 (m, 2 H, CH<sub>2</sub>), 1.40-1.18 (m, 16 H, 8 x CH<sub>2</sub>), 0.88 (t,  $J$  = 7.0 Hz, 3 H, CH<sub>3</sub>); <sup>13</sup>C NMR (100 MHz, CDCl<sub>3</sub>):  $\delta$  = 133.1, 131.5, 122.6, 121.6, 91.4, 83.7, 63.0, 37.8, 31.9, 29.63, 29.61, 29.54, 29.51, 29.3, 29.2, 25.2, 22.7, 14.1; MS (EI 70 ev  $m/z$ ) (%): 366 (M<sup>+</sup>(<sup>81</sup>Br), 4.77), 364 (M<sup>+</sup>(<sup>79</sup>Br), 4.94), 211 (100); IR (neat):  $\nu$  = 3357, 2914, 2848, 1475, 1413, 1256, 1121, 1058 cm<sup>-1</sup>; Anal. Calcd. for C<sub>20</sub>H<sub>29</sub><sup>79</sup>BrO: C 65.75, H 8.00; found C 65.69, H 8.04.

### 3. Preparation of 3-methyl-1-phenyloct-1-yn-3-yl methyl ether (**3**)<sup>3</sup> (hcf-2-148)

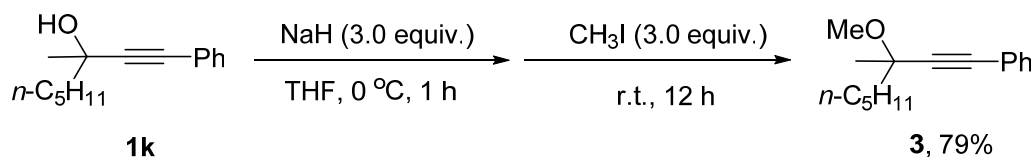

To a flame-dried Schlenk tube were added **1k** (1.7297 g, 8 mmol) and THF (10 mL). Then NaH (0.9613 g, 24 mmol) was added at 0 °C under argon. After stirring at 0 °C for 1 h, iodomethane (1.5 mL,  $d = 2.28$  g/mL, 3.42 g, 24 mmol) was added. The resulting mixture was warmed up to room temperature, stirred for 12 h, and quenched with water (20 mL). After extraction with ethyl acetate (20 mL x 3), the organic layer was washed with brine (10 mL) and dried with anhydrous Na<sub>2</sub>SO<sub>4</sub>. After filtration and concentration under reduced pressure, the crude product was purified by column chromatography on silica gel to afford **3** (1.4516 g, 79%) as a colorless oil [eluent: petroleum ether 100 mL to petroleum ether/ethyl acetate = 100/1 (~810 mL)]: **<sup>1</sup>H NMR** (400 MHz, CDCl<sub>3</sub>):  $\delta = 7.48$ - $7.39$  (m, 2 H, Ar-H),  $7.36$ - $7.26$  (m, 3 H, Ar-H),  $3.42$  (s, 3 H, OMe),  $1.83$ - $1.66$  (m, 2 H, CH<sub>2</sub>),  $1.65$ - $1.42$  (m, 5 H, CH<sub>2</sub> and CH<sub>3</sub>),  $1.41$ - $1.23$  (m, 4 H, 2 x CH<sub>2</sub>),  $0.91$  (t,  $J = 6.8$  Hz, 3 H, CH<sub>3</sub>); **<sup>13</sup>C NMR** (100 MHz, CDCl<sub>3</sub>):  $\delta = 131.7$ ,  $128.2$ ,  $128.1$ ,  $123.0$ ,  $90.5$ ,  $85.2$ ,  $74.0$ ,  $51.4$ ,  $41.3$ ,  $32.0$ ,  $25.6$ ,  $24.0$ ,  $22.6$ ,  $14.0$ ; **MS** (EI 70 eV  $m/z$ ) (%): 230 (M<sup>+</sup>, 1.02), 159 (100); **IR** (neat):  $\nu = 2981$ ,  $2934$ ,  $2862$ ,  $2823$ ,  $1598$ ,  $1490$ ,  $1462$ ,  $1169$ ,  $1078$  cm<sup>-1</sup>; **HRMS** calcd for C<sub>16</sub>H<sub>22</sub>O [M]<sup>+</sup>: 230.1671, found: 230.1674.

### 4. Preparation of 3-methyl-1-phenyloct-1-yn-3-yl acetate (**4**)<sup>4</sup> (hcf-2-146)

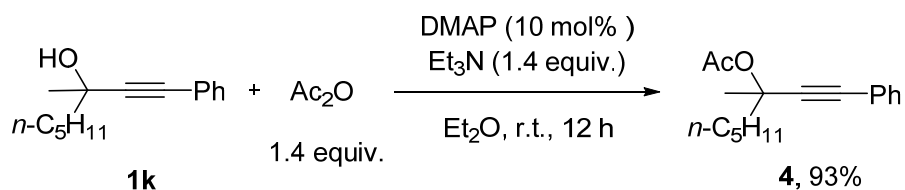

To a flask were added **1k** (1.0809 g, 5 mmol) and Et<sub>2</sub>O (50 mL). Then acetic anhydride (0.66 mL,  $d = 1.08$  g/mL, 0.7128 g, 7 mmol), trimethylamine (0.97 mL,  $d = 0.73$  g/mL, 0.7081 g, 7 mmol), and DMAP (61.3 mg, 0.5 mmol) were added

sequentially. The resulting mixture was stirred at room temperature for 12 h and concentrated under reduced pressure. After that, the crude product was purified by column chromatography on silica gel to afford **4** (1.2071 g, 93%) as a colorless oil [eluent: petroleum ether 100 mL to petroleum ether/ ethyl acetate = 100/1 (~500 mL)]:  $^1\text{H NMR}$  (400 MHz,  $\text{CDCl}_3$ ):  $\delta$  = 7.48-7.39 (m, 2 H, Ar-H), 7.34-7.23 (m, 3 H, Ar-H), 2.10-1.96 (m, 4 H, one proton of  $\text{CH}_2$  and  $\text{CH}_3$ ), 1.94-1.81 (m, 1 H, one proton of  $\text{CH}_2$ ), 1.74 (s, 3 H,  $\text{CH}_3$ ), 1.64-1.44 (m, 2 H,  $\text{CH}_2$ ), 1.42-1.28 (m, 4 H, 2 x  $\text{CH}_2$ ), 0.91 (t,  $J$  = 7.0 Hz, 3 H,  $\text{CH}_3$ );  $^{13}\text{C NMR}$  (100 MHz,  $\text{CDCl}_3$ ):  $\delta$  = 169.3, 131.8, 128.2, 128.1, 122.7, 89.5, 84.9, 75.8, 41.5, 31.7, 26.5, 23.9, 22.5, 22.0, 14.0; **MS** (EI 70 eV  $m/z$ ) (%): 258 ( $\text{M}^+$ , 1.02), 160 (100); **IR** (neat):  $\nu$  = 2954, 2932, 2864, 2240, 1742, 1490, 1367, 1232, 1149, 1122, 1012  $\text{cm}^{-1}$ ; **HRMS** calcd for  $\text{C}_{17}\text{H}_{22}\text{O}_2$  [ $\text{M}$ ] $^+$ : 258.1620, found: 258.1622.

## 5. Synthesis of 3-hydroxy-2(*E*)-alkenoates

### (1) Preparation of methyl (*E*)-4-hydroxy-2-phenyl-4-(pyridin-4-yl)pent-2-enoate (*E*)-**2a** (hcf-1-197)

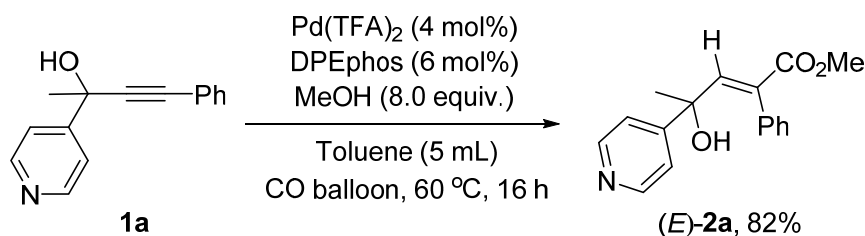

**Typical Procedure IV:** To a flame-dried Schlenk tube were added  $\text{Pd(TFA)}_2$  (13.6 mg, 0.04 mmol),  $\text{DPEphos}$  (32.3 mg, 0.06 mmol), **1a** (223.3 mg, 1 mmol), and  $\text{MeOH}$  (259.6 mg, 8.0 mmol)/toluene (5 mL) sequentially under argon. The resulting mixture was then frozen with a liquid nitrogen bath, degassed to remove the argon inside completely, and refilled with CO by a balloon of CO for three times. Then the resulting mixture was stirred at 60 °C with a balloon of CO for 16 h. After that, the resulting mixture was diluted with 3 mL of ethyl acetate, filtered through a short column of silica gel (3 cm) eluted with ethyl acetate (20 x 2 mL), and concentrated. The residue was purified by column chromatography on silica gel to afford impure

(*E*)-**2a** (241.3 mg) [eluent: dichloromethane/ethyl acetate = 5/1 (480 mL), 3/1 (200 mL), ethyl acetate (300 mL)], then recrystallized (petroleum ether/dichloromethane) to afford (*E*)-**2a** (232.1 mg, 82%): white solid, m.p. 112.9-113.5 °C (petroleum ether/dichloromethane); <sup>1</sup>H NMR (400 MHz, CDCl<sub>3</sub>): δ = 8.43 (d, *J* = 6.0 Hz, 2 H, Ar-H), 7.41 (s, 1 H, =CH), 7.33-7.17 (m, 5 H, Ar-H), 7.01-6.92 (m, 2 H, Ar-H), 3.71 (s, 3 H, CO<sub>2</sub>Me), 3.17 (s, 1 H, OH), 1.59 (s, 3 H, CH<sub>3</sub>); <sup>13</sup>C NMR (100 MHz, CDCl<sub>3</sub>): δ = 167.4, 155.9, 149.6, 147.4, 134.0, 133.4, 129.2, 128.3, 128.2, 120.0, 73.8, 52.6, 31.2; MS (ESI) *m/z*: 284 (M+H<sup>+</sup>); IR (neat): ν = 3033, 2987, 2965, 2810, 2673, 1713, 1603, 1415, 1230, 1021 cm<sup>-1</sup>; Anal. Calcd. for C<sub>17</sub>H<sub>17</sub>NO<sub>3</sub>: C 72.07, H 6.05, N 4.94; found C 72.05, H 6.02, N 5.00.

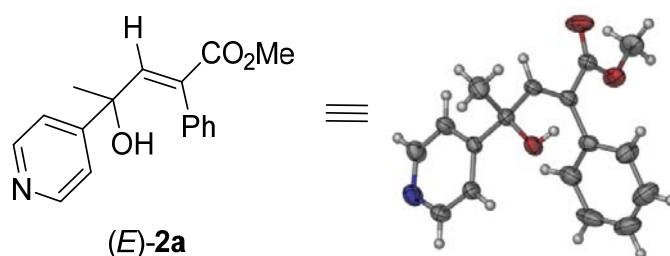

**Figure S1**

(*E*)-**2a**: C<sub>17</sub>H<sub>17</sub>NO<sub>3</sub>, MW = 283.32, monoclinic, space group *P2*(1)/*n*, final *R* indices [*I* > 2σ(*I*)], *R*<sub>1</sub> = 0.0539, *wR*<sub>2</sub> = 0.1472; *R* indices (all data), *R*<sub>1</sub> = 0.0765, *wR*<sub>2</sub> = 0.1585, *a* = 9.0342(9) Å, *b* = 14.3895(15) Å, *c* = 14.5074(15) Å, α = 90°, β = 101.707(3)°, γ = 90°, *V* = 1846.7(3) Å<sup>3</sup>, *T* = 296(2) K, *Z* = 4, reflections collected/unique 3255/3255 [*R*<sub>int</sub> = 0.0000], no. of observations [*I* > 2σ(*I*)] 2244, parameters: 190. Supplementary crystallographic data have been deposited at the Cambridge Crystallographic Data Centre via [www.ccdc.cam.ac.uk/data\\_request/cif](http://www.ccdc.cam.ac.uk/data_request/cif). CCDC-1571775

**(2) Preparation of methyl (*E*)-4-hydroxy-2-phenyl-4-(pyridin-3-yl)pent-2-enoate ((*E*)-**2b**) (hcf-1-198)**

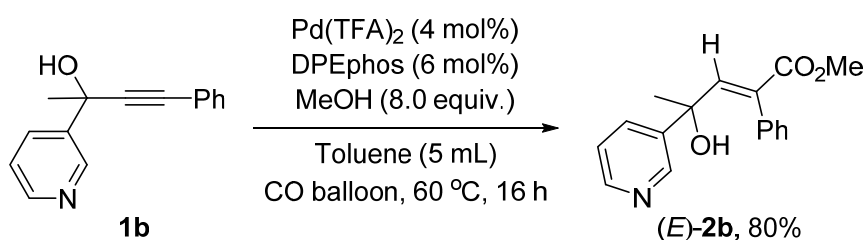

Following **Typical Procedure IV**, the reaction of Pd(TFA)<sub>2</sub> (13.6 mg, 0.04

mmol), DPEphos (32.3 mg, 0.06 mmol), **1b** (223.4 mg, 1 mmol), and MeOH (261.1 mg, 8 mmol)/toluene (5 mL) afforded (*E*)-**2b** (225.4 mg, 80%) [eluent: dichloromethane/ethyl acetate = 5/1 (480 mL), 3/1 (200 mL), ethyl acetate (300 mL)]: white solid, m.p. 108.5-109.1 °C (petroleum ether/ethyl acetate); <sup>1</sup>H NMR (400 MHz, CDCl<sub>3</sub>): δ = 8.53 (d, *J* = 2.0 Hz, 1 H, Ar-H), 8.41 (dd, *J*<sub>1</sub> = 4.8 Hz, *J*<sub>2</sub> = 1.6 Hz, 1 H, Ar-H), 7.61 (dt, *J*<sub>1</sub> = 8.0 Hz, *J*<sub>2</sub> = 1.9 Hz, 1 H, Ar-H), 7.44 (s, 1 H, =CH), 7.33-7.21 (m, 3 H, Ar-H), 7.21-7.15 (m, 1 H, Ar-H), 7.02-6.93 (m, 2 H, Ar-H), 3.71 (s, 3 H, CO<sub>2</sub>Me), 2.79 (s, 1 H, OH), 1.64 (s, 3 H, CH<sub>3</sub>); <sup>13</sup>C NMR (100 MHz, CDCl<sub>3</sub>): δ = 167.5, 148.1, 148.0, 146.9, 142.4, 134.1, 133.0, 132.7, 129.2, 128.14, 128.09, 123.1, 73.3, 52.5, 31.1; MS (ESI) *m/z*: 284 (M+H<sup>+</sup>); IR (neat): ν = 3166, 2988, 2966, 2809, 1713, 1642, 1431, 1237, 1034, 1019 cm<sup>-1</sup>; Anal. Calcd. for C<sub>17</sub>H<sub>17</sub>NO<sub>3</sub>: C 72.07, H 6.05, N 4.94; found C 72.05, H 6.10, N 4.89.

**(3) Preparation of methyl (*E*)-4-hydroxy-2-phenyl-4-(pyridin-2-yl)pent-2-enoate ((*E*)-**2c**) (hcf-2-2)**

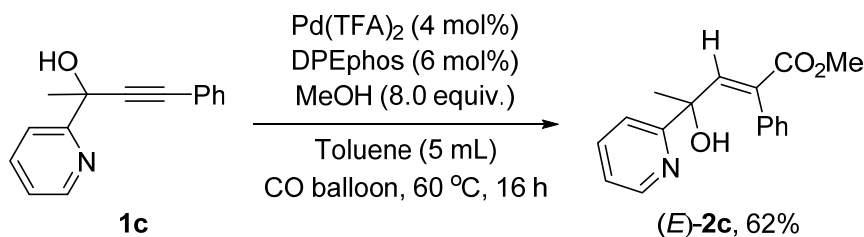

Following **Typical Procedure IV**, the reaction of Pd(TFA)<sub>2</sub> (13.6 mg, 0.04 mmol), DPEphos (32.3 mg, 0.06 mmol), **1c** (223.5 mg, 1 mmol), and MeOH (259.7 mg, 8 mmol)/toluene (5 mL) afforded (*E*)-**2c** (176.1 mg, 62%) as a yellow oil [eluent: dichloromethane 200 mL to dichloromethane/ethyl acetate = 30/1]: <sup>1</sup>H NMR (400 MHz, CDCl<sub>3</sub>): δ = 8.41 (d, *J* = 4.8 Hz, 1 H, Ar-H), 7.58 (td, *J*<sub>1</sub> = 7.8 Hz, *J*<sub>2</sub> = 1.6 Hz, 1 H, Ar-H), 7.39 (s, 1 H, =CH), 7.25-7.17 (m, 4 H, Ar-H), 7.13 (dd, *J*<sub>1</sub> = 7.0 Hz, *J*<sub>2</sub> = 5.0 Hz, 1 H, Ar-H), 7.02-6.90 (m, 2 H, Ar-H), 4.65 (br, 1 H, OH), 3.69 (s, 3 H, CO<sub>2</sub>Me), 1.60 (s, 3 H, CH<sub>3</sub>); <sup>13</sup>C NMR (100 MHz, CDCl<sub>3</sub>): δ = 168.0, 163.1, 148.5, 147.5, 136.8, 135.0, 133.1, 129.4, 127.5, 127.3, 122.1, 119.9, 73.9, 52.3, 29.7; MS (70 eV, EI) *m/z* (%): 284(M<sup>+</sup>+1, 6.07), 283 (M<sup>+</sup>, 31.07), 162 (100); IR (neat): ν = 3400, 3056, 2980, 2950, 1713, 1589, 1433, 1241, 1195, 1072, 1019 cm<sup>-1</sup>; HRMS calcd for

C<sub>17</sub>H<sub>17</sub>NO<sub>3</sub> [M]<sup>+</sup>: 283.1208, found: 283.1212.

**(4) Preparation of methyl (*E*)-4-hydroxy-2-phenyl-4-(quinolin-3-yl)pent-2-enoate ((*E*)-2d) (hcf-2-3)**

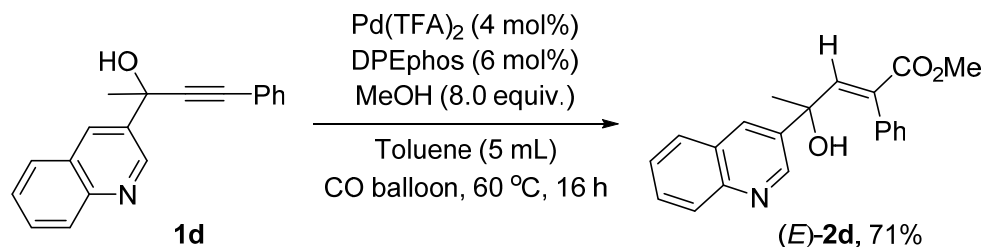

Following **Typical Procedure IV**, the reaction of Pd(TFA)<sub>2</sub> (13.6 mg, 0.04 mmol), DPEphos (32.3 mg, 0.06 mmol), **1d** (273.3 mg, 1 mmol), and MeOH (260.1 mg, 8 mmol)/toluene (5 mL) afforded impure (*E*)-**2d** (243.4 mg) [eluent: dichloromethane/ethyl acetate = 40/1 (205 mL), 20/1 (420 mL), ethyl acetate (200 mL)], then recrystallized (petroleum ether/dichloromethane) to afford pure (*E*)-**2d** (236.7 mg, 71%): white solid, m.p. 137.7-138.5 °C (petroleum ether/dichloromethane); <sup>1</sup>H NMR (400 MHz, CDCl<sub>3</sub>): δ = 8.92 (d, *J* = 2.4 Hz, 1 H, Ar-H), 8.08 (d, *J* = 8.8 Hz, 1 H, Ar-H), 7.97 (d, *J* = 1.6 Hz, 1 H, =CH), 7.79-7.66 (m, 2 H, Ar-H), 7.59-7.49 (m, 2 H, Ar-H), 7.26-7.14 (m, 3 H, Ar-H), 7.02-6.93 (m, 2 H, Ar-H), 3.73 (s, 3 H, CO<sub>2</sub>Me), 2.35-2.25 (m, 1 H, OH), 1.76 (s, 3 H, CH<sub>3</sub>); <sup>13</sup>C NMR (100 MHz, CDCl<sub>3</sub>): δ = 167.5, 148.8, 147.9, 146.9, 139.4, 134.0, 133.3, 131.4, 129.4, 129.2, 128.9, 128.1, 127.9, 127.3, 126.8, 73.6, 52.5, 31.1; MS (70 eV, EI) *m/z* (%): 333 (M<sup>+</sup>, 3.38), 230 (100); IR (neat): ν = 3174, 3055, 2992, 2948, 2922, 2851, 1709, 1433, 1254, 1198, 1113, 1036, 1021 cm<sup>-1</sup>; Anal. Calcd. for C<sub>21</sub>H<sub>19</sub>NO<sub>3</sub>: C 75.66, H 5.74, N 4.20; found C 75.31, H 5.78, N 4.19.

**(5) Preparation of methyl (*E*)-4-hydroxy-4-(pyridin-4-yl)-2-(p-tolyl)pent-2-enoate ((*E*)-2e) (hcf-2-15)**

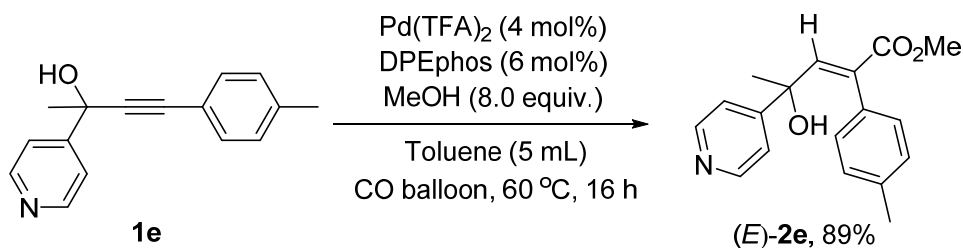

Following **Typical Procedure IV**, the reaction of Pd(TFA)<sub>2</sub> (13.6 mg, 0.04

mmol), DPEphos (32.3 mg, 0.06 mmol), **1e** (237.2 mg, 1 mmol), and MeOH (258.1 mg, 8 mmol)/toluene (5 mL) afforded (*E*)-**2e** (264.6 mg, 89%) [eluent: dichloromethane/ethyl acetate = 5/1 (480 mL), 3/1 (200 mL), ethyl acetate (200 mL)]: white solid, m.p. 105.9-106.4 °C (petroleum ether/dichloromethane); <sup>1</sup>H NMR (400 MHz, CDCl<sub>3</sub>): δ = 8.49 (d, *J* = 6.0 Hz, 2 H, Ar-H), 7.40 (s, 1 H, =CH), 7.24 (d, *J* = 6.4 Hz, 2 H, Ar-H), 7.09 (d, *J* = 7.6 Hz, 2 H, Ar-H), 6.87 (d, *J* = 7.6 Hz, 2 H, Ar-H), 3.72 (s, 3 H, CO<sub>2</sub>Me), 2.61 (s, 1 H, OH), 2.34 (s, 3 H, CH<sub>3</sub>), 1.60 (s, 3 H, CH<sub>3</sub>); <sup>13</sup>C NMR (100 MHz, CDCl<sub>3</sub>): δ = 167.6, 156.1, 149.4, 147.3, 138.1, 133.2, 130.8, 129.1, 128.9, 120.1, 73.7, 52.5, 31.1, 21.2; MS (70 eV, EI) *m/z* (%): 298 (M<sup>+</sup>+1, 2.12), 297 (M<sup>+</sup>, 10.45), 194 (100); IR (neat): ν = 3121, 3030, 2974, 2956, 2860, 2814, 1708, 1601, 1413, 1260, 1222, 1172, 1018 cm<sup>-1</sup>; Anal. Calcd. for C<sub>18</sub>H<sub>19</sub>NO<sub>3</sub>: C 72.71, H 6.44, N 4.71; found C 72.89, H 6.33, N 4.61.

**(6) Preparation of methyl (*E*)-2-(2-hydroxy-2-(pyridin-4-yl)propylidene)-hexanoate ((*E*)-**2f**) (hcf-2-4)**

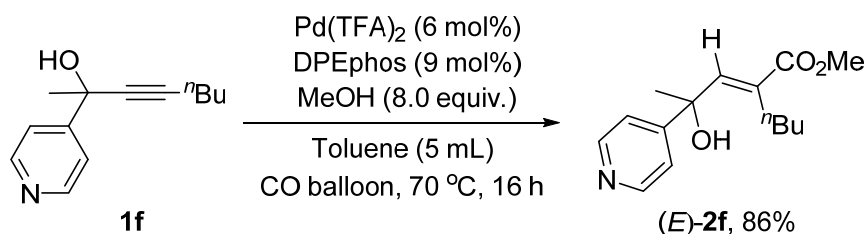

Following **Typical Procedure IV**, the reaction of Pd(TFA)<sub>2</sub> (20.4 mg, 0.06 mmol), DPEphos (48.5 mg, 0.09 mmol), **1f** (203.3 mg, 1 mmol), and MeOH (260.4 mg, 8 mmol)/toluene (5 mL) afforded impure (*E*)-**2f** (230.1 mg) [eluent: dichloromethane/ethyl acetate = 5/1 (480 mL), ethyl acetate 300 mL], then recrystallized (petroleum ether/dichloromethane) to afford pure (*E*)-**2f** (226.5 mg, 86%): white solid, m.p. 97.5-98.4 °C (petroleum ether/dichloromethane); <sup>1</sup>H NMR (400 MHz, CDCl<sub>3</sub>): δ = 8.55 (d, *J* = 5.6 Hz, 2 H, Ar-H), 7.44-7.35 (m, 2 H, Ar-H), 7.02 (s, 1 H, =CH), 3.75 (s, 3 H, CO<sub>2</sub>Me), 2.81-2.48 (br, 1 H, OH), 2.32-2.20 (m, 2 H, CH<sub>2</sub>), 1.72 (s, 3 H, CH<sub>3</sub>), 1.28-0.98 (m, 4 H, 2 X CH<sub>2</sub>), 0.77 (t, *J* = 7.2 Hz, 3 H, CH<sub>3</sub>); <sup>13</sup>C NMR (100 MHz, CDCl<sub>3</sub>): δ = 168.6, 157.0, 149.1, 144.9, 136.2, 120.4, 72.8, 51.9, 32.3, 30.7, 27.2, 22.8, 13.6; MS (ESI) *m/z*: 264 (M+H<sup>+</sup>); IR (neat): ν = 3163, 2962,

2931, 2861, 1708, 1599, 1432, 1409, 1267, 1173, 1080  $\text{cm}^{-1}$ ; Anal. Calcd. for  $\text{C}_{15}\text{H}_{21}\text{NO}_3$ : C 68.42, H 8.04, N 5.32; found C 68.35, H 7.96, N 5.20.

**(7) Preparation of methyl (*E*)-2-(2-hydroxy-2-(pyridin-4-yl)propylidene)-decanoate ((*E*)-2g) (hcf-2-27)**

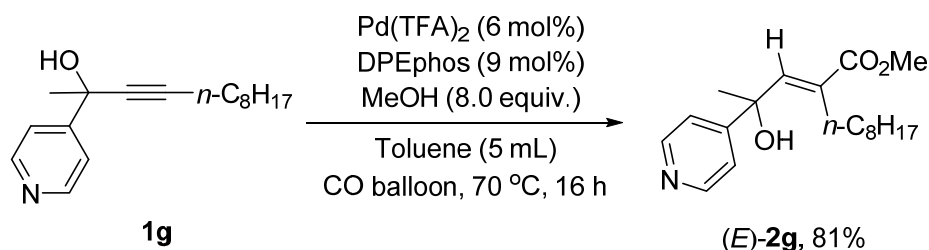

Following **Typical Procedure IV**, the reaction of  $\text{Pd(TFA)}_2$  (20.4 mg, 0.06 mmol),  $\text{DPEphos}$  (48.5 mg, 0.09 mmol), **1g** (259.6 mg, 1 mmol)/toluene (4.0 mL), and  $\text{MeOH}$  (259.7 mg, 8 mmol)/toluene (1.0 mL) afforded (*E*)-**2g** (258.9 mg, 81%) as a yellow oil [First run: eluent: dichloromethane/ethyl acetate = 5/1 (480 mL), 1/1 (200 mL) to ethyl acetate (100 mL) got the impure product. Second run: eluent: dichloromethane/ethyl acetate = 10/1 (440 mL), 5/1 (480 mL), 3/1 (200 mL), 1/1 (100 mL) got the pure (*E*)-**2g**]:  $^1\text{H NMR}$  (400 MHz,  $\text{CDCl}_3$ ):  $\delta$  = 8.54 (brs, 2 H, Ar-H), 7.40 (d,  $J$  = 4.8 Hz, 2 H, Ar-H), 7.01 (s, 1 H, =CH), 3.75 (s, 3 H,  $\text{CO}_2\text{Me}$ ), 2.90-2.58 (m, 1 H, OH), 2.38-2.17 (m, 2 H,  $\text{CH}_2$ ), 1.71 (s, 3 H,  $\text{CH}_3$ ), 1.38-0.98 (m, 12 H, 6 X  $\text{CH}_2$ ), 0.87 (t,  $J$  = 7.0 Hz, 3 H,  $\text{CH}_3$ );  $^{13}\text{C NMR}$  (100 MHz,  $\text{CDCl}_3$ ):  $\delta$  = 168.6, 157.2, 149.2, 144.6, 136.4, 120.5, 72.9, 51.9, 32.4, 31.7, 29.8, 29.14, 29.08, 28.7, 27.6, 22.6, 14.0; **MS** (70 eV, EI)  $m/z$  (%): 319 ( $\text{M}^+$ , 1.64), 276 (100); **IR** (neat):  $\nu$  = 3148, 2920, 2852, 1719, 1601, 1434, 1246, 1224, 1195, 1086, 1065, 1003  $\text{cm}^{-1}$ ; **HRMS** calcd for  $\text{C}_{19}\text{H}_{29}\text{NO}_3$  [ $\text{M}^+$ ]: 319.2147, found: 319.2143.

**(8) Preparation of methyl (*E*)-4-hydroxy-2-phenyl-4-(pyridin-4-yl)hex-2-enoate ((*E*)-2h) (hcf-1-199)**

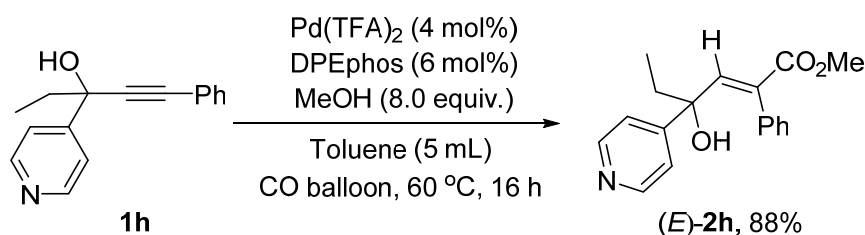

Following **Typical Procedure IV**, the reaction of  $\text{Pd(TFA)}_2$  (13.6 mg, 0.04



mmol), DPEphos (32.4 mg, 0.06 mmol), **1h** (237.1 mg, 1 mmol), and MeOH (260.1 mg, 8 mmol)/toluene (5 mL) afforded impure (*E*)-**2h** (265.1 mg) [eluent: dichloromethane/ethyl acetate = 5/1 (480 mL), ethyl acetate (300 mL)], then recrystallized (petroleum ether/dichloromethane) to afford pure (*E*)-**2h** (262.3 mg, 88%): white solid, m.p. 104.1-104.9 °C (petroleum ether/ethyl acetate); <sup>1</sup>H NMR (400 MHz, CDCl<sub>3</sub>): δ = 8.53 (d, *J* = 4.6 Hz, 2 H, Ar-H), 7.41 (s, 1 H, =CH), 7.37-7.25 (m, 3 H, Ar-H), 7.21 (dd, *J*<sub>1</sub> = 4.8 Hz, *J*<sub>2</sub> = 1.60 Hz, 2 H, Ar-H), 7.02-6.92 (m, 2 H, Ar-H), 3.72 (s, 3 H, CO<sub>2</sub>Me), 2.03 (s, 1 H, OH), 2.01-1.80 (m, 2 H, CH<sub>2</sub>), 0.83 (t, *J* = 7.4 Hz, 3 H, CH<sub>3</sub>); <sup>13</sup>C NMR (100 MHz, CDCl<sub>3</sub>): δ = 167.4, 154.9, 149.6, 147.0, 134.0, 133.7, 129.2, 128.4, 128.3, 120.3, 76.4, 52.5, 36.6, 7.6; MS (ESI) *m/z*: 298 (M+H<sup>+</sup>); IR (neat): ν = 3101, 3054, 2956, 2927, 2848, 1711, 1602, 1429, 1242, 1007 cm<sup>-1</sup>; Anal. Calcd. for C<sub>18</sub>H<sub>19</sub>NO<sub>3</sub>: C 72.71, H 6.44, N 4.71; found C 72.65, H 6.48, N 4.60.

**(9) Preparation of methyl (*E*)-2-(2-hydroxy-2-phenyl-2-(pyridin-4-yl)ethylidene)-hexanoate ((*E*)-**2i**) (hcf-2-70)**

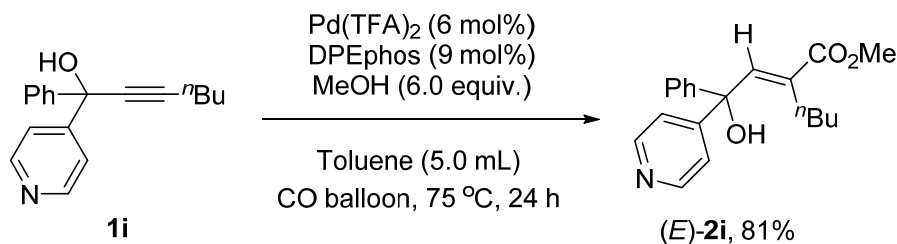

Following **Typical Procedure IV**, the reaction of Pd(TFA)<sub>2</sub> (20.4 mg, 0.06 mmol), DPEphos (48.5 mg, 0.09 mmol), **1i** (265.4 mg, 1 mmol), and MeOH (193.1 mg, 6 mmol)/toluene (5.0 mL) afforded (*E*)-**2i** (263.6 mg, 81%) as a white solid [eluent: dichloromethane (1000 mL) to dichloromethane/ethyl acetate = 5/1 (480 mL), 3/1 (200 mL)]: m.p. 92.5-93.0 °C (petroleum ether/dichloromethane); <sup>1</sup>H NMR (400 MHz, CDCl<sub>3</sub>): δ = 8.27 (d, *J* = 4.8 Hz, 2 H, Ar-H), 7.47-7.16 (m, 8 H, Ar-H and =CH), 5.33 (brs, 1 H, OH), 3.72 (s, 3 H, CO<sub>2</sub>Me), 2.36 (t, *J* = 7.4 Hz, 2 H, CH<sub>2</sub>), 1.24-1.02 (m, 4 H, 2 X CH<sub>2</sub>), 0.73 (t, *J* = 6.8 Hz, 3 H, CH<sub>3</sub>); <sup>13</sup>C NMR (100 MHz, CDCl<sub>3</sub>): δ = 168.6, 156.3, 148.9, 145.8, 143.8, 137.2, 128.4, 127.6, 126.2, 121.3, 77.4, 51.9, 30.7, 27.5, 22.8, 13.6; MS (EI 70 ev) *m/z* (%): 325 (M<sup>+</sup>, 4.23), 187 (100); IR (neat): ν =

3086, 2948, 2860, 1715, 1597, 1436, 1262, 1247, 1208, 1129, 1021, 1003 cm<sup>-1</sup>;

HRMS calcd for C<sub>20</sub>H<sub>23</sub>NO<sub>3</sub> [M]<sup>+</sup>: 325.1678, found: 325.1681.

**(10) Preparation of methyl (*E*)-2-(2-hydroxy-2-(4-nitrophenyl)propylidene)octanoate ((*E*)-2j) (hcf-2-82)**

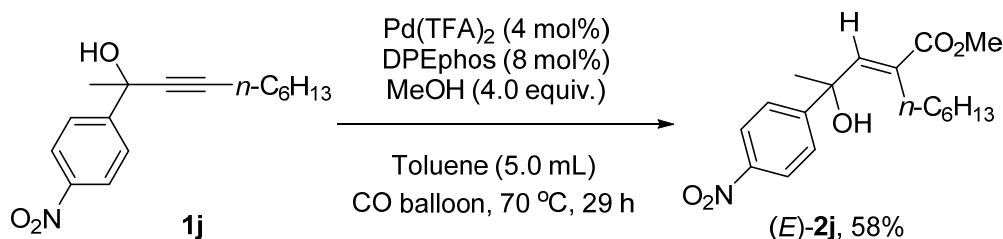

Following **Typical Procedure IV**, the reaction of Pd(TFA)<sub>2</sub> (13.6 mg, 0.04 mmol), DPEphos(43.1 mg, 0.08 mmol), **1j** (275.4 mg, 1 mmol)/toluene (4.0 mL), and MeOH (129.9 mg, 4 mmol)/toluene (1.0 mL) afforded (*E*)-**2j** (194.5 mg, 58%) as a white solid [eluent: petroleum ether/ethyl acetate = 20/1 (420 mL), 10/1 (1100 mL), 5/1 (240 mL)]: m.p. 90.1-90.5 °C (petroleum ether/ethyl acetate); <sup>1</sup>H NMR (400 MHz, CDCl<sub>3</sub>): δ = 8.20 (d, *J* = 8.8 Hz, 2 H, Ar-H), 7.66 (d, *J* = 9.2 Hz, 2 H, Ar-H), 7.06 (s, 1 H, =CH), 3.75 (s, 3 H, CO<sub>2</sub>Me), 2.30-2.15 (m, 2 H, CH<sub>2</sub>), 2.07 (s, 1 H, OH), 1.75 (s, 3 H, CH<sub>3</sub>), 1.28-0.95 (m, 8 H, 4 x CH<sub>2</sub>), 0.82 (t, *J* = 7.2 Hz, 3 H, CH<sub>3</sub>); <sup>13</sup>C NMR (100 MHz, CDCl<sub>3</sub>): δ = 168.5, 154.5, 146.8, 144.6, 136.8, 126.1, 123.5, 73.7, 52.1, 33.2, 31.4, 29.4, 28.6, 27.7, 22.4, 13.9; **MS** (EI 70 ev) *m/z* (%): 335 (M<sup>+</sup>, 1.28), 292 (100); **IR** (neat): ν = 3488, 3111, 3077, 2963, 2922, 2857, 1699, 1516, 1348, 1243, 1174, 1090 cm<sup>-1</sup>; Anal. Calcd. for C<sub>18</sub>H<sub>25</sub>NO<sub>5</sub>: C 64.46, H 7.51, N 4.18; found C 64.39, H 7.52, N 4.04.

**(11) Preparation of methyl (*E*)-4-hydroxy-4-methyl-2-phenylnon-2-enoate ((*E*)-2k) (hcf-2-46)**

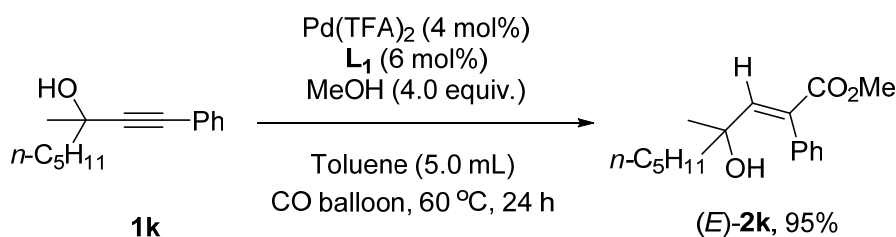

Following **Typical Procedure IV**, the reaction of Pd(TFA)<sub>2</sub> (13.6 mg, 0.04 mmol), L<sub>1</sub> (32.8 mg, 0.06 mmol), **1k** (216.5 mg, 1 mmol)/toluene (4.0 mL), and MeOH (129.9 mg, 4 mmol)/toluene (1.0 mL) afforded (*E*)-**2k** (262.7 mg, 95%) as a yellow oil [eluent: petroleum ether/ethyl acetate = 20/1 (420 mL), 10/1 (440 mL)]: <sup>1</sup>H

**NMR** (400 MHz, CDCl<sub>3</sub>):  $\delta$  = 7.41-7.30 (m, 3 H, Ar-H), 7.24-7.17 (m, 2 H, Ar-H), 7.08 (s, 1 H, =CH), 3.70 (s, 3 H, CO<sub>2</sub>Me), 1.56-1.44 (m, 2 H, CH<sub>2</sub>), 1.41-1.18 (m, 10 H, 3 x CH<sub>2</sub> and CH<sub>3</sub> and OH), 0.88 (t,  $J$  = 7.2 Hz, 3 H, CH<sub>3</sub>); **<sup>13</sup>C NMR** (100 MHz, CDCl<sub>3</sub>):  $\delta$  = 167.9, 149.5, 135.1, 131.4, 129.4, 128.1, 127.9, 74.3, 52.3, 43.1, 32.1, 29.0, 23.6, 22.5, 14.0; **MS** (ESI)  $m/z$ : 299 (M+Na)<sup>+</sup>, 259 (M-OH)<sup>+</sup>; **IR** (neat):  $\nu$  = 3486, 2953, 2931, 2860, 1716, 1637, 1435, 1238, 1197, 1020 cm<sup>-1</sup>; **HRMS** calcd for C<sub>17</sub>H<sub>25</sub>O<sub>3</sub> [M+H<sup>+</sup>]: 277.1798, found: 277.1795.

**(12) Preparation of methyl (*E*)-2-(4-bromophenyl)-4-hydroxy-4-methylnon-2-enoate ((*E*)-2I) (hcf-2-60)**

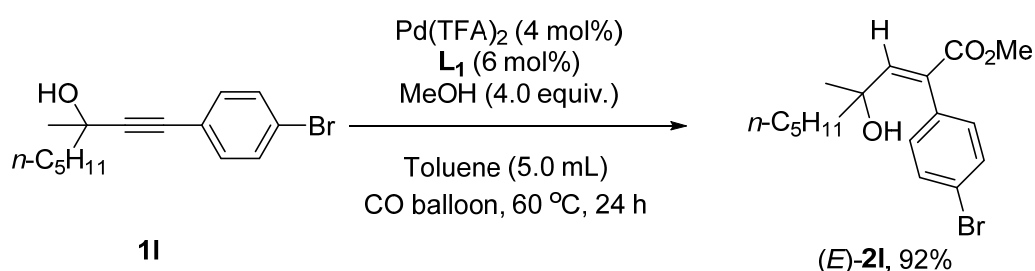

Following **Typical Procedure IV**, the reaction of Pd(TFA)<sub>2</sub> (13.6 mg, 0.04 mmol), **L**<sub>1</sub> (32.8 mg, 0.06 mmol), **1I** (295.1 mg, 1 mmol)/toluene (4.0 mL), and MeOH (131.1 mg, 4 mmol)/toluene (1.0 mL) afforded (*E*)-**2I** (326.7 mg, 92%) as a yellow oil [eluent: petroleum ether/ethyl acetate = 20/1 (420 mL), 10/1 (440 mL)]: **<sup>1</sup>H NMR** (400 MHz, CDCl<sub>3</sub>):  $\delta$  = 7.49 (d,  $J$  = 8.8 Hz, 2 H, Ar-H), 7.07 (d,  $J$  = 8.4 Hz, 2 H, Ar-H), 7.08 (s, 1 H, =CH), 3.71 (s, 3 H, CO<sub>2</sub>Me), 1.58-1.45 (m, 2 H, CH<sub>2</sub>), 1.44-1.10 (m, 10 H, 3 x CH<sub>2</sub> and CH<sub>3</sub> and OH), 0.88 (t,  $J$  = 7.2 Hz, 3 H, CH<sub>3</sub>); **<sup>13</sup>C NMR** (100 MHz, CDCl<sub>3</sub>):  $\delta$  = 167.5, 150.1, 134.2, 131.20, 131.17, 130.5, 122.0, 74.3, 52.4, 43.1, 32.1, 28.9, 23.6, 22.5, 14.0; **MS** (ESI)  $m/z$ : 339 (M(<sup>81</sup>Br)-OH)<sup>+</sup>, 337 (M(<sup>79</sup>Br)-OH)<sup>+</sup>; **IR** (neat):  $\nu$  = 3489, 2952, 2930, 2859, 1714, 1487, 1434, 1237, 1071, 1010 cm<sup>-1</sup>; **HRMS** calcd for C<sub>17</sub>H<sub>24</sub><sup>79</sup>BrO<sub>3</sub> [M+H<sup>+</sup>]: 355.0903, found: 355.0900.

**Gram scale synthesis methyl (*E*)-2-(4-bromophenyl)-4-hydroxy-4-methylnon-2-enoate ((*E*)-2I) (hcf-2-97)**

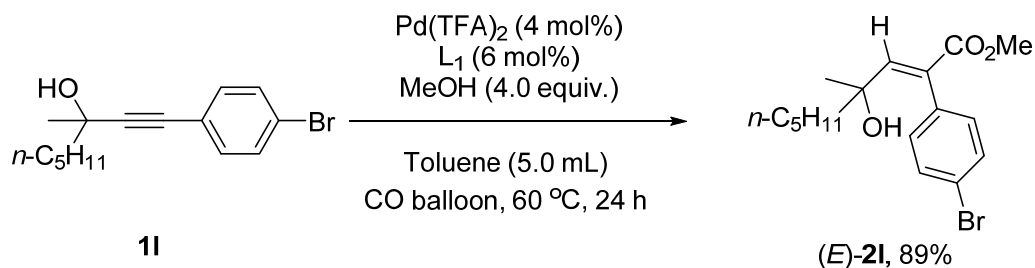

Following **Typical Procedure IV**, the reaction of Pd(TFA)<sub>2</sub> (54.4 mg, 0.16 mmol), **L**<sub>1</sub> (131.2 mg, 0.24 mmol), **1I** (1.1811 g, 4 mmol)/toluene (16.0 mL), and MeOH (513.9 mg, 16 mmol)/toluene (4.0 mL) afforded (*E*)-**2I** (1.2650 g, 89%) as a yellow oil [eluent: petroleum ether/ethyl acetate = 50/1 (510 mL), 20/1 (525 mL), 5/1 (600 mL)]: <sup>1</sup>H NMR (400 MHz, CDCl<sub>3</sub>): δ = 7.49 (d, *J* = 8.4 Hz, 2 H, Ar-H), 7.076 (d, *J* = 8.4 Hz, 2 H, Ar-H), 7.078 (s, 1 H, =CH), 3.71 (s, 3 H, CO<sub>2</sub>Me), 1.56-1.46 (m, 2 H, CH<sub>2</sub>), 1.42-1.18 (m, 9 H, 3 x CH<sub>2</sub> and CH<sub>3</sub>), 1.15 (s, 1 H, OH), 0.89 (t, *J* = 7.0 Hz, 3 H, CH<sub>3</sub>); <sup>13</sup>C NMR (100 MHz, CDCl<sub>3</sub>): δ = 167.5, 150.1, 134.2, 131.2, 131.1, 130.4, 121.9, 74.3, 52.4, 43.1, 32.0, 28.9, 23.6, 22.5, 14.0.

**(13) Preparation of methyl (*E*)-2-butyl-4-hydroxy-4-methylnon-2-enoate ((*E*)-**2m**) (**hcf-2-92**)**

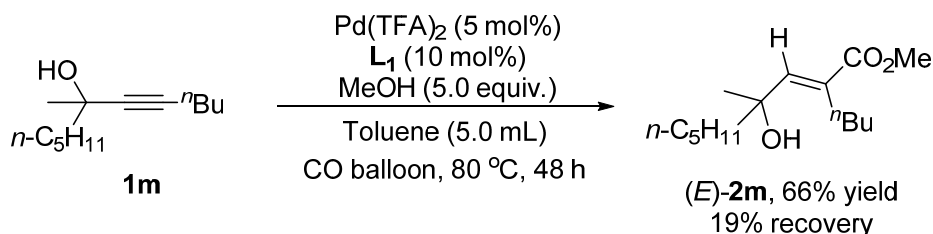

Following **Typical Procedure IV**, the reaction of Pd(TFA)<sub>2</sub> (17.0 mg, 0.05 mmol), **L**<sub>1</sub> (54.7 mg, 0.10 mmol), **1m** (196.3 mg, 1 mmol)/toluene (4.0 mL), and MeOH (160.5 mg, 5 mmol)/toluene (1.0 mL) afforded (*E*)-**2m** (169.2 mg, 66%) (19% of **1m** remained based on <sup>1</sup>H NMR analysis of the crude product) as a yellow oil [eluent: petroleum ether/ethyl acetate = 50/1 (~410 mL), 20/1 (840 mL)]: <sup>1</sup>H NMR (400 MHz, CDCl<sub>3</sub>): δ = 6.66 (s, 1 H, =CH), 3.73 (s, 3 H, CO<sub>2</sub>Me), 2.65-2.51 (m, 2 H, CH<sub>2</sub>), 1.71-1.53 (m, 3 H, CH<sub>2</sub> and OH), 1.47-1.21 (m, 13 H, 5 x CH<sub>2</sub> and CH<sub>3</sub>), 0.98-0.83 (m, 6 H, 2 x CH<sub>3</sub>); <sup>13</sup>C NMR (100 MHz, CDCl<sub>3</sub>): δ = 169.1, 146.0, 133.3, 74.0, 51.8, 43.6, 32.3, 32.2, 29.0, 26.7, 23.6, 23.0, 22.5, 14.0, 13.9; **MS** (ESI) *m/z*: 239 (M-OH)<sup>+</sup>; **IR** (neat): ν = 3496, 2955, 2931, 2861, 1698, 1459, 1436, 1262, 1207,

1123  $\text{cm}^{-1}$ ; **HRMS** calcd for  $\text{C}_{15}\text{H}_{27}\text{O}_2$   $[\text{M}-\text{OH}]^+$ : 239.2006, found: 239.2005.

**(14) Preparation of methyl (*E*)-2-octyl-4-hydroxy-4-methylhept-2-enoate ((*E*)-2n) (zwl-11-198)**

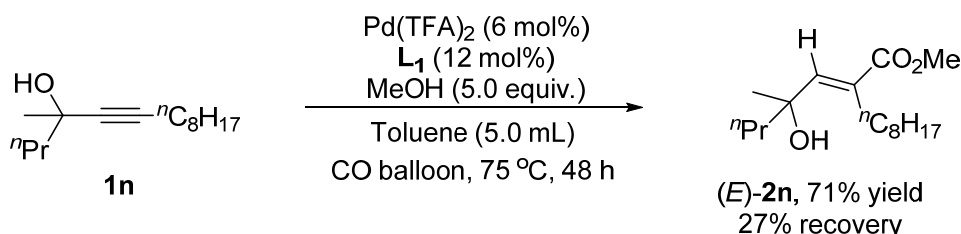

Following **Typical Procedure IV**, the reaction of  $\text{Pd}(\text{TFA})_2$  (20.6 mg, 0.06 mmol),  $\text{L}_1$  (65.7 mg, 0.12 mmol), **1n** (224.5 mg, 1 mmol)/toluene (4.0 mL), and MeOH (160.1 mg, 5 mmol)/toluene (1.0 mL) afforded (*E*)-**2n** (202.1 mg, 71%) (27% of **1n** remained based on  $^1\text{H}$  NMR analysis of the crude product) as an oil [eluent: petroleum ether/ethyl ether/dichloromethane = 20/1/1]:  **$^1\text{H}$  NMR** (400 MHz,  $\text{CDCl}_3$ ):  $\delta$  = 6.66 (s, 1 H, =CH), 3.73 (s, 3 H,  $\text{CO}_2\text{Me}$ ), 2.63-2.50 (m, 2 H,  $\text{CH}_2$ ), 1.68-1.52 (m, 3 H,  $\text{CH}_2$  and OH), 1.50-1.17 (m, 17 H, 7 x  $\text{CH}_2$  and  $\text{CH}_3$ ), 0.93 (t,  $J$  = 7.4 Hz, 3 H,  $\text{CH}_3$ ), 0.88 (t,  $J$  = 6.6 Hz, 3 H,  $\text{CH}_3$ );  **$^{13}\text{C}$  NMR** (100 MHz,  $\text{CDCl}_3$ ):  $\delta$  = 169.1, 145.9, 133.4, 74.1, 51.8, 45.9, 31.8, 30.1, 30.0, 29.4, 29.2, 29.0, 27.0, 22.6, 17.3, 14.4, 14.1; **MS** (70 eV, EI)  $m/z$  (%): 285 ( $\text{M}^++1$ , 1.00), 284 ( $\text{M}^+$ , 1.94), 241 (100); **IR** (neat):  $\nu$  = 3507, 2957, 2925, 2855, 1699, 1641, 1459, 1436, 1233, 1177, 1125  $\text{cm}^{-1}$ ; **HRMS** calcd for  $\text{C}_{17}\text{H}_{32}\text{O}_3$   $[\text{M}]^+$ : 284.2351, found: 284.2354.

**(15) Preparation of methyl (*E*)-2-propyl-4-hydroxy-4-methylocta-2,7-dienoate ((*E*)-2o) (zwl-11-176)**

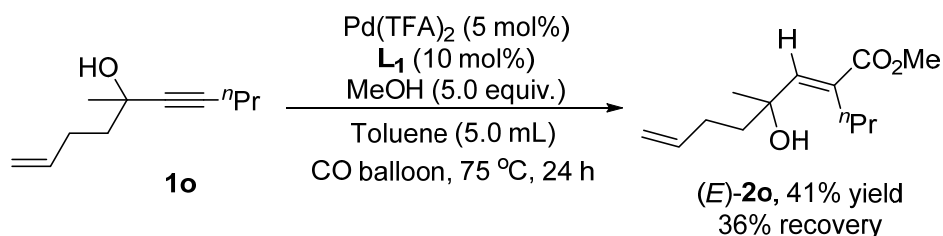

Following **Typical Procedure IV**, the reaction of  $\text{Pd}(\text{TFA})_2$  (17.2 mg, 0.05 mmol),  $\text{L}_1$  (54.8 mg, 0.10 mmol), **1o** (166.4 mg, 1 mmol)/toluene (4.0 mL), and MeOH (160.4 mg, 5 mmol)/toluene (1.0 mL) afforded (*E*)-**2o** (91.1 mg, 41%) (36% of **1o** remained based on  $^1\text{H}$  NMR analysis of the crude product) as an oil [eluent:

petroleum ether/ethyl acetate = 20/1]:  $^1\text{H NMR}$  (400 MHz,  $\text{CDCl}_3$ ):  $\delta$  = 6.66 (s, 1 H, =CH), 5.92-5.78 (m, 1 H, =CH), 5.05 (d,  $J$  = 18.4 Hz, 1 H, one proton of = $\text{CH}_2$ ), 4.97 (d,  $J$  = 10.4 Hz, 1 H, one proton of = $\text{CH}_2$ ), 3.74 (s, 3 H,  $\text{CO}_2\text{Me}$ ), 2.64-2.49 (m, 2 H,  $\text{CH}_2$ ), 2.27-2.06 (m, 2 H,  $\text{CH}_2$ ), 1.83-1.65 (m, 2 H,  $\text{CH}_2$ ), 1.65-1.55 (m, 1 H, OH), 1.52-1.35 (m, 5 H,  $\text{CH}_2$  and  $\text{CH}_3$ ), 0.94 (t,  $J$  = 7.2 Hz, 3 H,  $\text{CH}_3$ );  $^{13}\text{C NMR}$  (100 MHz,  $\text{CDCl}_3$ ):  $\delta$  = 169.1, 145.7, 138.4, 133.4, 114.8, 74.0, 51.8, 42.4, 29.1, 28.9, 28.4, 23.2, 14.3; **MS** (ESI)  $m/z$ : 249 ( $\text{M}+\text{Na}$ ) $^+$ , 209 ( $\text{M}-\text{OH}$ ) $^+$ ; **IR** (neat):  $\nu$  = 3498, 2958, 2932, 2872, 1698, 1641, 1436, 1268, 1219, 1171, 1121, 1060  $\text{cm}^{-1}$ ; **HRMS** calcd for  $\text{C}_{13}\text{H}_{22}\text{O}_3\text{Na}$  [ $\text{M}+\text{Na}$ ] $^+$ : 249.1461, found: 249.1455.

**(16) Preparation of methyl (*E*)-2-(4-chlorobutyl)-4-hydroxy-4-methylhept-2-enoate ((*E*)-2p) (zwl-11-196)**

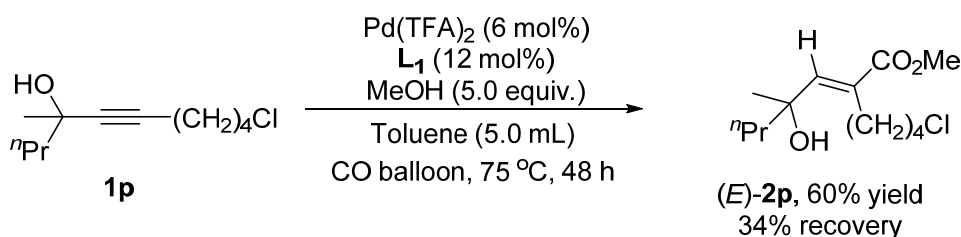

Following **Typical Procedure IV**, the reaction of  $\text{Pd(TFA)}_2$  (20.5 mg, 0.06 mmol),  $\text{L}_1$  (65.7 mg, 0.12 mmol), **1p** (202.6 mg, 1 mmol)/toluene (4.0 mL), and MeOH (160.1 mg, 5 mmol)/toluene (1.0 mL) afforded (*E*)-**2p** (157.6 mg, 60%) (34% of **1p** remained based on  $^1\text{H NMR}$  analysis of the crude product) as an oil [eluent: petroleum ether/ethyl ether/dichloromethane = 20/1/1]:  $^1\text{H NMR}$  (400 MHz,  $\text{CDCl}_3$ ):  $\delta$  = 6.67 (s, 1 H, =CH), 3.74 (s, 3 H,  $\text{CO}_2\text{Me}$ ), 3.56 (t,  $J$  = 6.8 Hz, 2 H,  $\text{CH}_2$ ), 2.70-2.55 (m, 2 H,  $\text{CH}_2$ ), 1.88-1.78 (m, 2 H,  $\text{CH}_2$ ), 1.70-1.20 (m, 10 H, OH and 3 x  $\text{CH}_2$ , and  $\text{CH}_3$ ), 0.94 (t,  $J$  = 7.4 Hz, 3 H,  $\text{CH}_3$ );  $^{13}\text{C NMR}$  (100 MHz,  $\text{CDCl}_3$ ):  $\delta$  = 168.9, 146.5, 132.2, 74.0, 51.7, 45.9, 44.7, 32.5, 29.0, 27.1, 25.8, 17.1, 14.3; **MS** (ESI)  $m/z$ : 247 ( $\text{M}(^{37}\text{Cl})-\text{OH}$ ) $^+$ , 245 ( $\text{M}(^{35}\text{Cl})-\text{OH}$ ) $^+$ ; **IR** (neat):  $\nu$  = 3495, 2957, 2872, 1697, 1642, 1436, 1274, 1237, 1190, 1094  $\text{cm}^{-1}$ ; **HRMS** calcd for  $\text{C}_{13}\text{H}_{23}\text{O}_3^{35}\text{Cl}$  [ $\text{M}$ ] $^+$ : 262.1336, found: 262.1335.

**(17) Preparation of methyl (*E*)-4-hydroxy-2,4-diphenylpent-2-enoate ((*E*)-2q) (hcf-2-55)**

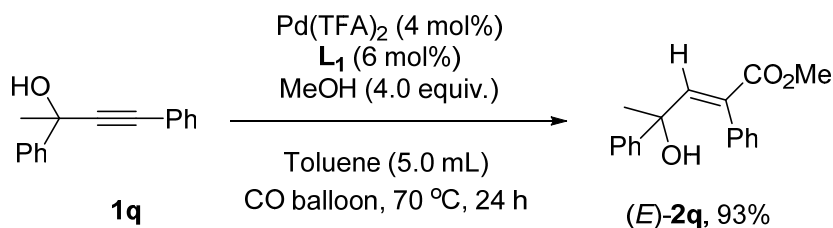

Following **Typical Procedure IV**, the reaction of Pd(TFA)<sub>2</sub> (13.6 mg, 0.04 mmol), **L**<sub>1</sub> (32.8 mg, 0.06 mmol), **1q** (222.3 mg, 1 mmol), and MeOH (132.1 mg, 4 mmol)/toluene (5.0 mL) afforded (*E*)-**2q** (261.8 mg, 93%) as a white solid [eluent: petroleum ether (100 mL) to petroleum ether/ethyl acetate = 20/1 (~530 mL), 10/1 (440 mL)]: m.p. 64.5-65.0 °C (petroleum ether/dichloromethane); <sup>1</sup>H NMR (400 MHz, CDCl<sub>3</sub>): δ = 7.48 (s, 1 H, =CH), 7.39-7.18 (m, 8 H, Ar-H), 7.06-6.96 (m, 2 H, Ar-H), 3.70 (s, 3 H, CO<sub>2</sub>Me), 1.99 (s, 1 H, OH), 1.60 (s, 3 H, CH<sub>3</sub>); <sup>13</sup>C NMR (100 MHz, CDCl<sub>3</sub>): δ = 167.8, 149.1, 147.1, 134.6, 131.7, 129.4, 128.3, 128.1, 127.9, 127.1, 124.9, 74.8, 52.4, 31.2; **MS** (ESI) *m/z*: 300 (M+NH<sub>4</sub>)<sup>+</sup>, 265 (M-OH)<sup>+</sup>; **IR** (neat): ν = 3505, 3057, 3010, 2986, 2954, 1693, 1639, 1435, 1251, 1211, 1149 cm<sup>-1</sup>; Anal. Calcd. for C<sub>18</sub>H<sub>18</sub>O<sub>3</sub>: C 76.57, H 6.43; found C 76.69, H 6.58.

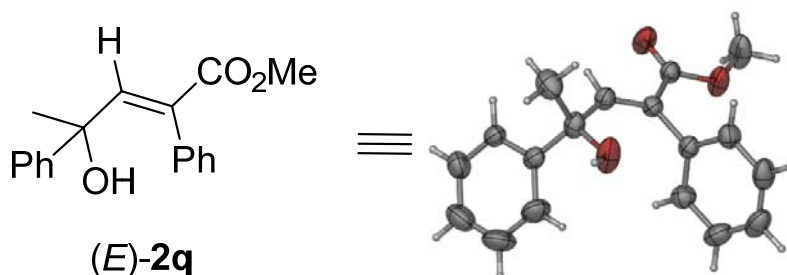

**Figure S2**

**(E)-2q**: C<sub>18</sub>H<sub>18</sub>O<sub>3</sub>, MW = 282.32, orthorhombic, space group *P*2<sub>1</sub>2<sub>1</sub>2<sub>1</sub>, final *R* indices [*I* > 2σ(*I*)], *R*<sub>1</sub> = 0.0278, *wR*<sub>2</sub> = 0.0691; *R* indices (all data), *R*<sub>1</sub> = 0.0288, *wR*<sub>2</sub> = 0.0696, *a* = 7.95790(10) Å, *b* = 12.9023(2) Å, *c* = 14.8437(2) Å, α = 90°, β = 90°, γ = 90°, *V* = 1524.08(4) Å<sup>3</sup>, *T* = 293(2) K, *Z* = 4, reflections collected/unique 15571/2710 [*R*<sub>int</sub> = 0.0285], no. of observations [*I* > 2σ(*I*)] 2617, parameters: 194. Supplementary crystallographic data have been deposited at the Cambridge Crystallographic Data Centre via [www.ccdc.cam.ac.uk/data\\_request/cif](http://www.ccdc.cam.ac.uk/data_request/cif). CCDC-1845002

**(18) Preparation of methyl (*E*)-2-(2-hydroxy-2-phenylpropylidene)hexanoate ((*E*)-**2r**) (**hcf-2-83**)**

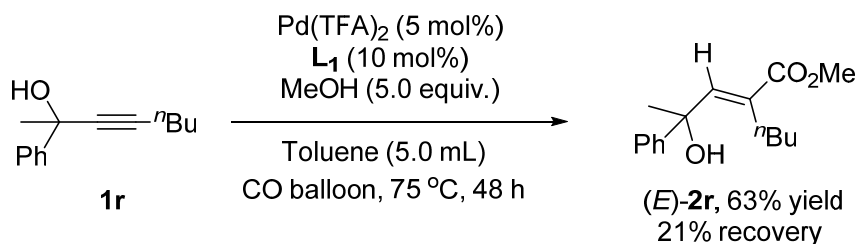

Following **Typical Procedure IV**, the reaction of Pd(TFA)<sub>2</sub> (17.0 mg, 0.05 mmol), **L**<sub>1</sub> (54.7 mg, 0.10 mmol), **1r** (202.3 mg, 1 mmol)/toluene (4.0 mL), and MeOH (161.9 mg, 5 mmol)/toluene (1.0 mL) afforded (*E*)-**2r** (165.3 mg, 63%) (21% of **1r** remained based on <sup>1</sup>H NMR analysis of the crude product) as a yellow oil [eluent: petroleum ether/ethyl acetate = 50/1 (~410 mL), 20/1 (420 mL), 10/1 (220 mL)]: **<sup>1</sup>H NMR** (400 MHz, CDCl<sub>3</sub>): δ = 7.51-7.42 (m, 2 H, Ar-H), 7.39-7.29 (m, 2 H, Ar-H), 7.29-7.22 (m, 1 H, Ar-H), 7.07 (s, 1 H, =CH), 3.73 (s, 3 H, CO<sub>2</sub>Me), 2.33-2.21 (m, 2 H, CH<sub>2</sub>), 2.03 (s, 1 H, OH), 1.74 (s, 3 H, CH<sub>3</sub>), 1.21-1.02 (m, 4 H, 2 x CH<sub>2</sub>), 0.76 (t, *J* = 7.0 Hz, 3 H, CH<sub>3</sub>); **<sup>13</sup>C NMR** (100 MHz, CDCl<sub>3</sub>): δ = 168.9, 147.0, 146.4, 134.6, 128.3, 127.1, 125.1, 74.3, 51.8, 31.8, 31.0, 27.2, 22.9, 13.7; **MS** (EI 70 ev) *m/z* (%): 262 (M<sup>+</sup>, 1.80), 187 (100); **IR** (neat): ν = 3483, 2955, 2930, 2870, 1697, 1437, 1263, 1209, 1140, 1066 cm<sup>-1</sup>; **HRMS** calcd for C<sub>16</sub>H<sub>22</sub>O<sub>3</sub> [M]<sup>+</sup>: 262.1569, found: 262.1566.

**(19) Preparation of methyl (*E*)-3-(1-hydroxycyclobutyl)-2-phenylacrylate ((*E*)-**2s**) (**hcf-2-87**)**

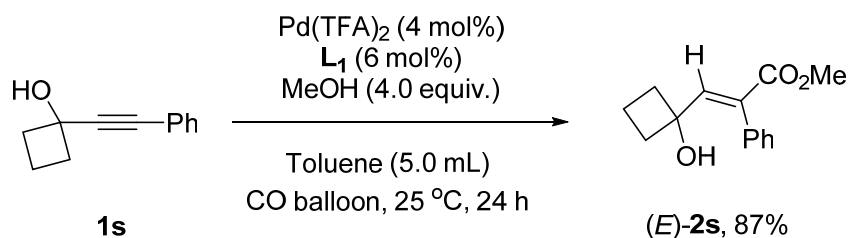

Following **Typical Procedure IV**, the reaction of Pd(TFA)<sub>2</sub> (13.6 mg, 0.04 mmol), **L**<sub>1</sub> (32.8 mg, 0.06 mmol), **1s** (172.2 mg, 1 mmol), and MeOH (129.9 mg, 5 mmol)/toluene (5.0 mL) afforded (*E*)-**2s** (202.1 mg, 87%) as a yellow oil [eluent: petroleum ether/ethyl acetate = 50/1 (~200 mL), 20/1 (420 mL), 10/1 (440 mL)]: **<sup>1</sup>H NMR** (400 MHz, CDCl<sub>3</sub>): δ = 7.42-7.29 (m, 3 H, Ar-H), 7.32 (s, 1 H, =CH), 7.25-7.18 (m, 2 H, Ar-H), 3.74 (s, 3 H, CO<sub>2</sub>Me), 2.28-2.16 (m, 2 H, CH<sub>2</sub>), 2.14-2.01 (m, 2 H, CH<sub>2</sub>), 1.94-1.78 (m, 2 H, one proton of CH<sub>2</sub> and OH), 1.76-1.62 (m, 1 H, one



proton of CH<sub>2</sub>); <sup>13</sup>C NMR (100 MHz, CDCl<sub>3</sub>): δ = 167.9, 147.2, 134.9, 131.9, 129.5, 128.23, 128.16, 75.1, 52.4, 37.2, 13.0; MS (ESI) *m/z*: 250 (M+NH<sub>4</sub><sup>+</sup>); IR (neat): ν = 2987, 2949, 1714, 1700, 1435, 1238, 1196, 1120 cm<sup>-1</sup>; HRMS calcd for C<sub>14</sub>H<sub>20</sub>NO<sub>3</sub> [M+NH<sub>4</sub><sup>+</sup>]: 250.1438, found: 250.1437.

**(20) Preparation of methyl 4-hydroxy-4-phenyl-2-(*E*)-2-phenylpent-2-enoate ((*E*)-2t) (hcf-2-89)**

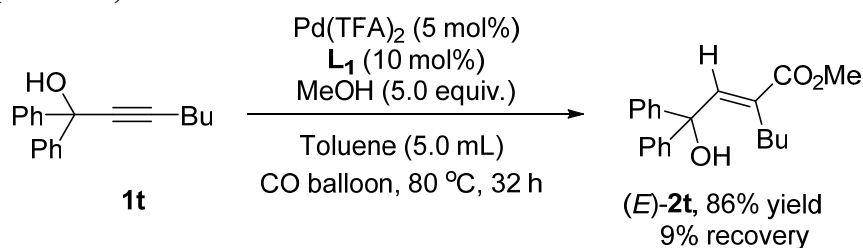

Following **Typical Procedure IV**, the reaction of Pd(TFA)<sub>2</sub> (17.0 mg, 0.05 mmol), **L**<sub>1</sub> (54.7 mg, 0.10 mmol), **1t** (264.6 mg, 1 mmol)/toluene (4.0 mL), and MeOH (160.9 mg, 5 mmol)/toluene (1.0 mL) afforded (*E*)-**2t** (279.2 mg, 86%) (9% of **1t** remained based on <sup>1</sup>H NMR analysis of the crude product) as a yellow oil [eluent: petroleum ether/ethyl acetate = 20/1 (525 mL), 10/1 (220 mL)]: <sup>1</sup>H NMR (400 MHz, CDCl<sub>3</sub>): δ = 7.48-7.20 (m, 11 H, Ar-H and =CH), 3.74 (s, 3 H, CO<sub>2</sub>Me), 2.46-2.31 (m, 3 H, CH<sub>2</sub> and OH), 1.30-1.08 (m, 4 H, 2 x CH<sub>2</sub>), 0.78 (t, *J* = 7.0 Hz, 3 H, CH<sub>3</sub>); <sup>13</sup>C NMR (100 MHz, CDCl<sub>3</sub>): δ = 168.9, 146.4, 144.8, 135.7, 128.3, 127.4, 126.5, 79.2, 51.9, 31.2, 27.5, 23.0, 13.8; MS (EI 70 eV) *m/z* (%): 324 (M<sup>+</sup>, 2.66), 187 (100); IR (neat): ν = 3475, 2953, 2930, 2861, 1698, 1446, 1261, 1209, 1136 cm<sup>-1</sup>; HRMS calcd for C<sub>21</sub>H<sub>24</sub>O<sub>3</sub> [M]<sup>+</sup>: 324.1725, found: 324.1722.

**(21) Preparation of methyl (*E*)-4-hydroxy-2-phenylpentadec-2-enoate ((*E*)-2u) (hcf-2-79)**

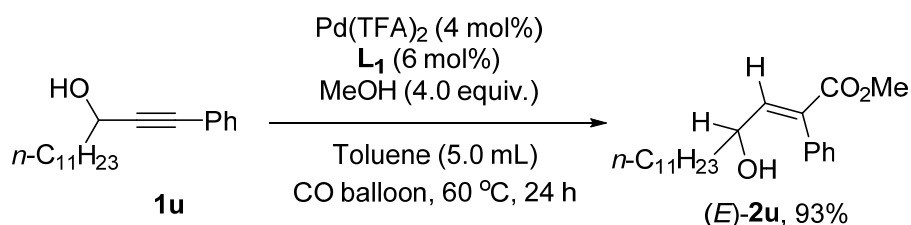

Following **Typical Procedure IV**, the reaction of Pd(TFA)<sub>2</sub> (13.6 mg, 0.04 mmol), **L**<sub>1</sub> (32.8 mg, 0.06 mmol), **1u** (286.5 mg, 1 mmol)/toluene (4.0 mL), and MeOH (128.9 mg, 4 mmol)/toluene (1.0 mL) afforded (*E*)-**2u** (322.2 mg, 93%) as a yellow oil [eluent: petroleum ether/ethyl acetate = 20/1 (420 mL), 10/1 (440 mL), 5/1

(480 mL)]:  $^1\text{H NMR}$  (400 MHz,  $\text{CDCl}_3$ ):  $\delta = 7.41\text{--}7.31$  (m, 3 H, Ar-H), 7.23-7.14 (m, 2 H, Ar-H), 6.92 (d,  $J = 9.6$  Hz, 1 H, =CH), 4.18-4.09 (m, 1 H, CH), 3.75 (s, 3 H,  $\text{CO}_2\text{Me}$ ), 1.71-1.44 (m, 3 H,  $\text{CH}_2$  and OH), 1.36-1.11 (m, 18 H, 9 x  $\text{CH}_2$ ), 0.88 (t,  $J = 7.0$  Hz, 3 H,  $\text{CH}_3$ );  $^{13}\text{C NMR}$  (100 MHz,  $\text{CDCl}_3$ ):  $\delta = 167.5, 145.1, 134.6, 134.2, 129.4, 128.1, 127.8, 68.7, 52.3, 36.8, 31.9, 29.6, 29.5, 29.44, 29.36, 29.31, 25.0, 22.7, 14.1$ ; **MS** (EI 70 eV)  $m/z$  (%): 346 ( $\text{M}^+$ , 1.71), 103 (100); **IR** (neat):  $\nu = 3419, 2923, 2853, 1720, 1459, 1435, 1236, 1195, 1174, 1024$   $\text{cm}^{-1}$ ; **HRMS** calcd for  $\text{C}_{22}\text{H}_{34}\text{O}_3$  [ $\text{M}$ ] $^+$ : 346.2508, found: 346.2514.

**(22) Preparation of methyl (*E*)-4-hydroxy-2,4-diphenylbut-2-enoate ((*E*)-2v) (hcf-2-125)**

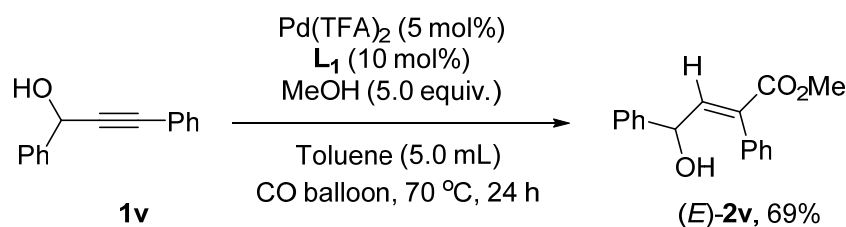

Following **Typical procedure IV**, the reaction of  $\text{Pd(TFA)}_2$  (17.0 mg, 0.05 mmol),  $\text{L}_1$  (54.7 mg, 0.10 mmol), **1v** (208.3 mg, 1 mmol)/toluene (4.0 mL), and MeOH (160.5 mg, 5 mmol)/toluene (1.0 mL) afforded (*E*)-**2v** (185.2 mg, 69%) as a yellow oil [eluent: petroleum ether/ethyl acetate = 10/1 (1100 mL), 5/1 (240 mL)]:  $^1\text{H NMR}$  (400 MHz,  $\text{CDCl}_3$ ):  $\delta = 7.50\text{--}7.24$  (m, 8 H, Ar-H), 7.24-7.11 (m, 3 H, Ar-H and =CH), 5.19 (d,  $J = 9.2$  Hz, 1 H, CH), 3.73 (s, 3 H,  $\text{CO}_2\text{Me}$ ), 2.13 (brs, 1 H, OH);  $^{13}\text{C NMR}$  (100 MHz,  $\text{CDCl}_3$ ):  $\delta = 167.4, 143.5, 141.7, 134.3, 134.0, 129.5, 128.7, 128.1, 128.0, 126.3, 70.9, 52.3$ ; **MS** (EI 70 eV)  $m/z$  (%): 269 ( $\text{M}^+ + 1$ , 1.31), 268 ( $\text{M}^+$ , 7.23), 105 (100); **IR** (neat):  $\nu = 3418, 1696, 1641, 1490, 1442, 1228$   $\text{cm}^{-1}$ ; **HRMS** calcd for  $\text{C}_{17}\text{H}_{16}\text{O}_3$  [ $\text{M}$ ] $^+$ : 268.1099, found: 268.1096.

**(23) Preparation of methyl (*E*)-4-hydroxy-2-(4-methoxyphenyl)-4-phenylbut-2-enoate ((*E*)-2w) (hcf-2-126)**

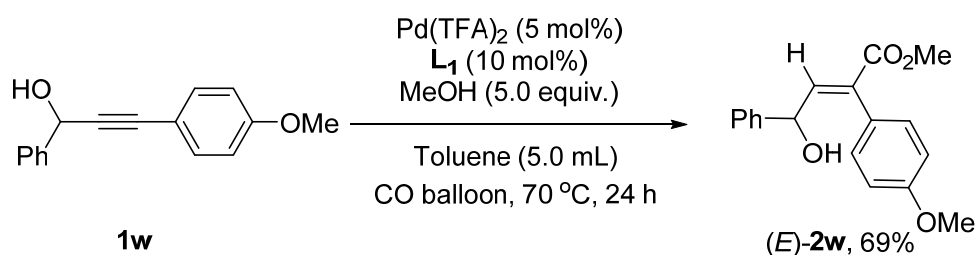

Following **Typical procedure IV**, the reaction of Pd(TFA)<sub>2</sub> (17.0 mg, 0.05 mmol), **L**<sub>1</sub> (54.7 mg, 0.10 mmol), **1w** (238.3 mg, 1 mmol)/toluene (4.0 mL), and MeOH (168.9 mg, 5 mmol)/toluene (1.0 mL) afforded (*E*)-**2w** (205.8 mg, 69%) as a yellow oil [eluent: petroleum ether/ethyl acetate = 10/1 (880 mL), 5/1 (600 mL)]: <sup>1</sup>H NMR (400 MHz, CDCl<sub>3</sub>): δ = 7.40-7.19 (m, 5 H, Ar-H), 7.19-7.03 (m, 3 H, Ar-H and =CH), 6.90 (d, *J* = 8.8 Hz, 2 H, Ar-H), 5.19 (d, *J* = 9.2 Hz, 1 H, CH), 3.81 (s, 3 H, CO<sub>2</sub>Me), 3.71 (s, 3 H, OMe), 2.55 (brs, 1 H, OH); <sup>13</sup>C NMR (100 MHz, CDCl<sub>3</sub>): δ = 167.6, 159.3, 143.1, 141.9, 133.7, 130.8, 128.7, 128.1, 126.5, 126.3, 113.6, 71.0, 55.2, 52.3; MS (EI 70 ev) *m/z* (%): 299 (M<sup>+</sup>+1, 1.96), 298 (M<sup>+</sup>, 9.60), 105 (100); IR (neat): ν = 3420, 3028, 2948, 2837, 1707, 1508, 1444, 1234, 1173, 1017 cm<sup>-1</sup>; HRMS calcd for C<sub>18</sub>H<sub>18</sub>O<sub>4</sub> [M]<sup>+</sup>: 298.1205, found: 298.1208.

**(24) Preparation of methyl (*E*)-2-(4-bromophenyl)-4-hydroxypentadec-2-enoate ((*E*)-**2x**) (hcf-2-114)**

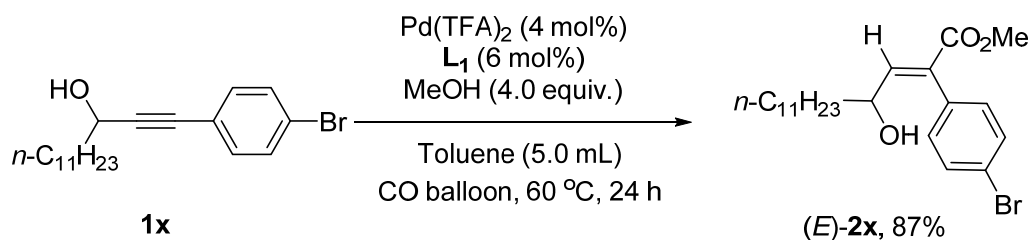

Following **Typical Procedure IV**, the reaction of Pd(TFA)<sub>2</sub> (13.6 mg, 0.04 mmol), **L**<sub>1</sub> (32.8 mg, 0.06 mmol), **1x** (365.4 mg, 1 mmol), and MeOH (128.7 mg, 4 mmol)/toluene (5.0 mL) afforded (*E*)-**2x** (370.1 mg, 87%) as a yellow oil [eluent: petroleum ether/ethyl acetate = 20/1 (420 mL), 10/1 (550 mL), 5/1 (240 mL)]: <sup>1</sup>H NMR (400 MHz, CDCl<sub>3</sub>): δ = 7.50 (d, *J* = 8.0 Hz, 2 H, Ar-H), 7.07 (d, *J* = 8.4 Hz, 2 H, Ar-H), 6.93 (d, *J* = 9.6 Hz, 1 H, =CH), 4.10 (q, *J* = 7.5 Hz, 1 H, CH), 3.75 (s, 3 H, CO<sub>2</sub>Me), 1.71-1.43 (m, 3 H, CH<sub>2</sub> and OH), 1.36-1.12 (m, 18 H, 9 x CH<sub>2</sub>), 0.88 (t, *J* = 7.0 Hz, 3 H, CH<sub>3</sub>); <sup>13</sup>C NMR (100 MHz, CDCl<sub>3</sub>): δ = 167.0, 145.6, 133.4, 133.1, 131.3, 131.2, 122.1, 68.6, 52.4, 36.8, 31.9, 29.6, 29.5, 29.4, 29.35, 29.31, 25.0, 22.7, 14.1; MS (EI 70 ev) *m/z* (%): 426 (M<sup>+</sup>(<sup>81</sup>Br), 1.43), 424 (M<sup>+</sup>(<sup>79</sup>Br), 1.23), 43 (100); IR (neat): ν = 3427, 2922, 2852, 1720, 1487, 1435, 1236, 1071, 1032, 1010 cm<sup>-1</sup>; HRMS calcd for C<sub>22</sub>H<sub>33</sub><sup>79</sup>BrO<sub>3</sub> [M]<sup>+</sup>: 424.1613, found: 424.1617.

**(25) Preparation of ethyl (*E*)-4-hydroxy-4-methyl-2-phenylnon-2-enoate ((*E*)-**2ka**) (hcf-2-76)**

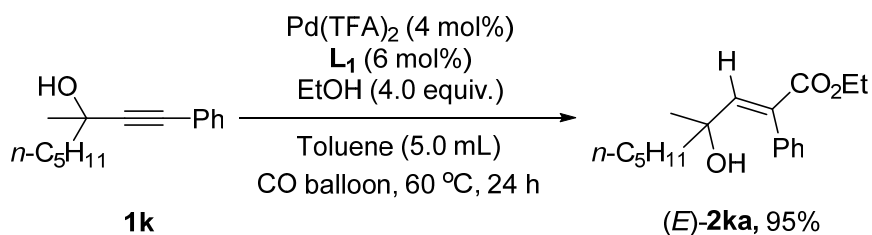

Following **Typical Procedure IV**, the reaction of Pd(TFA)<sub>2</sub> (13.6 mg, 0.04 mmol), **L**<sub>1</sub> (32.8 mg, 0.06 mmol), **1k** (216.3 mg, 1 mmol)/toluene (4 mL), and EtOH (185.9 mg, 4 mmol)/toluene (1 mL) afforded (*E*)-**2ka** (275.8 mg, 95%) as yellow oil [eluent: petroleum ether/ethyl acetate = 20/1 (420 mL), 10/1 (440 mL)]: <sup>1</sup>H NMR (400 MHz, CDCl<sub>3</sub>): δ = 7.42-7.30 (m, 3 H, Ar-H), 7.24-7.17 (m, 2 H, Ar-H), 7.05 (s, 1 H, =CH), 4.17 (q, *J* = 7.1 Hz, 2 H, CO<sub>2</sub>CH<sub>2</sub>), 1.57-1.46 (m, 2 H, CH<sub>2</sub>), 1.41-1.16 (m, 13 H, 3 x CH<sub>2</sub> and 2 x CH<sub>3</sub> and OH), 0.88 (t, *J* = 7.2 Hz, 3 H, CH<sub>3</sub>); <sup>13</sup>C NMR (100 MHz, CDCl<sub>3</sub>): δ = 167.5, 149.0, 135.2, 131.7, 129.5, 128.1, 127.8, 74.3, 61.2, 43.2, 32.1, 29.0, 23.6, 22.6, 14.1, 14.0; MS (ESI) *m/z*: 313 (M+Na)<sup>+</sup>, 308 (M+NH<sub>4</sub>)<sup>+</sup>, 291 (M+H)<sup>+</sup>, 273 (M-OH)<sup>+</sup>; IR (neat): ν = 3483, 2955, 2931, 2860, 1713, 1463, 1444, 1233, 1189, 1037, 1027 cm<sup>-1</sup>; HRMS calcd for C<sub>18</sub>H<sub>27</sub>O<sub>3</sub> [M+H]<sup>+</sup>: 291.1955, found: 291.1955.

**(26) Preparation of (trimethylsilyl)methyl 4-hydroxy-4-methyl-2(*E*)-phenyl-non-2-enoate ((*E*)-2kb) (hcf-3-19)**

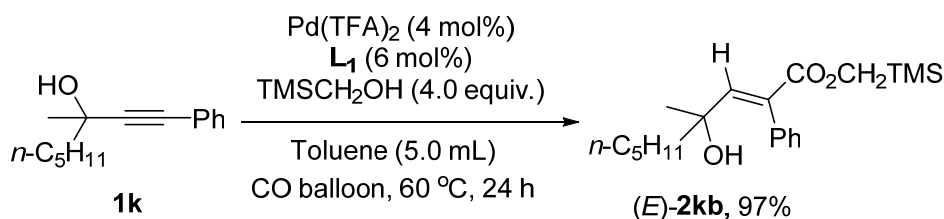

Following **Typical procedure IV**. The reaction of Pd(TFA)<sub>2</sub> (13.6 mg, 0.04 mmol), **L**<sub>1</sub> (32.8 mg, 0.06 mmol), **1k** (216.1 mg, 1 mmol)/toluene (4 mL), and TMSCH<sub>2</sub>OH (417.1 mg, 4 mmol)/toluene (1 mL) afforded (*E*)-**2kb** (336.7 mg, 97%) as a yellow oil [eluent: petroleum ether/ethyl acetate = 25/1 (520 mL), 10/1 (440 mL)]: <sup>1</sup>H NMR (400 MHz, CDCl<sub>3</sub>): δ = 7.39-7.28 (m, 3 H, Ar-H), 7.22-7.15 (m, 2 H, Ar-H), 7.05 (s, 1 H, =CH), 3.76 (s, 2 H, OCH<sub>2</sub>), 1.57-1.47 (m, 2 H, CH<sub>2</sub>), 1.44-1.18 (m, 10 H, 3 x CH<sub>2</sub> and CH<sub>3</sub> and OH), 0.88 (t, *J* = 7.0 Hz, 3 H, CH<sub>3</sub>), -0.08 (s, 9 H, 3 x CH<sub>3</sub>); <sup>13</sup>C

**NMR** (100 MHz, CDCl<sub>3</sub>):  $\delta$  = 168.3, 148.8, 135.5, 131.9, 129.4, 128.0, 127.7, 74.3, 58.3, 43.2, 32.1, 29.0, 23.6, 22.5, 14.0, -3.3; **MS** (EI 70 ev)  $m/z$  (%): 348 (M<sup>+</sup>, 1.58), 173 (100); **IR** (neat):  $\nu$  = 3487, 2956, 2931, 2861, 1713, 1287, 1249, 1217, 1148 cm<sup>-1</sup>; **HRMS** calcd for C<sub>20</sub>H<sub>32</sub>O<sub>3</sub>Si [M]<sup>+</sup>: 348.2121, found: 348.2110.

**(27) Preparation of isopropyl 4-hydroxy-4-methyl-2(*E*)-phenylnon-2-enoate ((*E*)-2kc) (hcf-3-20, 28)**

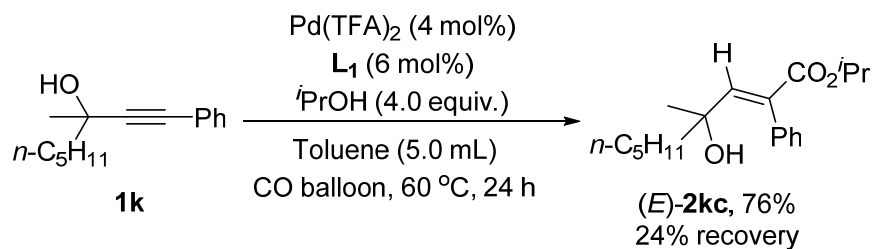

Following **Typical procedure IV**. The reaction of Pd(TFA)<sub>2</sub> (13.6 mg, 0.04 mmol), L<sub>1</sub> (32.8 mg, 0.06 mmol), **1k** (216.5 mg, 1 mmol)/toluene (4 mL), and *i*PrOH (240.5 mg, 4 mmol)/toluene (1 mL) afforded (*E*)-**2kc** (231.1 mg, 76%) (24% of **1k** remained based on <sup>1</sup>H NMR analysis of the crude product) as a yellow oil [eluent: petroleum ether/ethyl acetate = 20/1 (840 mL), 10/1 (220 mL)]: **<sup>1</sup>H NMR** (400 MHz, CDCl<sub>3</sub>):  $\delta$  = 7.40-7.27 (m, 3 H, Ar-H), 7.23-7.12 (m, 2 H, Ar-H), 7.01 (s, 1 H, =CH), 5.03 (hept,  $J$  = 6.2 Hz, 1 H, CH), 1.58-1.44 (m, 2 H, CH<sub>2</sub>), 1.44-1.08 (m, 16 H, 3 x CH<sub>2</sub> and 3 x CH<sub>3</sub> and OH), 0.88 (t,  $J$  = 7.2 Hz, 3 H, CH<sub>3</sub>); **<sup>13</sup>C NMR** (100 MHz, CDCl<sub>3</sub>):  $\delta$  = 166.9, 148.6, 135.3, 132.1, 129.5, 128.0, 127.7, 74.2, 68.5, 43.1, 32.1, 29.0, 23.5, 22.5, 21.7, 14.0; **MS** (ESI)  $m/z$ : 327 (M+Na)<sup>+</sup>, 287 (M-OH)<sup>+</sup>; **IR** (neat):  $\nu$  = 3497, 2956, 2932, 2870, 1709, 1465, 1373, 1238, 1182, 1106, 1004 cm<sup>-1</sup>; **HRMS** calcd for C<sub>19</sub>H<sub>28</sub>O<sub>3</sub> [M]<sup>+</sup>: 304.2038, found: 304.2038.

**(28) Preparation of phenyl (*E*)-4-hydroxy-4-methyl-2-phenylnon-2-enoate ((*E*)-2kd) (hcf-2-77)**

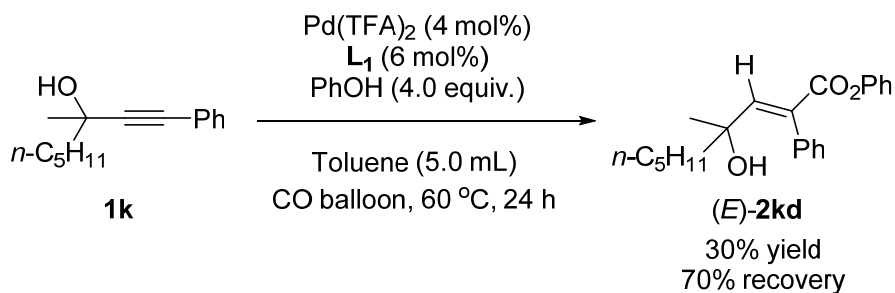

Following **Typical Procedure IV**, the reaction of Pd(TFA)<sub>2</sub> (13.6 mg, 0.04 mmol), **L**<sub>1</sub> (32.8 mg, 0.06 mmol), **1k** (216.5 mg, 1 mmol)/toluene (5 mL), and PhOH (376.6 mg, 4 mmol) afforded (*E*)-**2kd** (101.6 mg, 30%) (70% of **1k** remained based on <sup>1</sup>H NMR analysis of the crude product) as a yellow oil [eluent: petroleum ether/ethyl acetate = 50/1 (~200 mL), 20/1 (630 mL), 10/1 (220 mL)]: <sup>1</sup>H NMR (400 MHz, CDCl<sub>3</sub>): δ = 7.54-7.29 (m, 7 H, Ar-H), 7.27 (s, 1 H, =CH), 7.19 (t, *J* = 7.2 Hz, 1 H, Ar-H), 7.07 (d, *J* = 7.6 Hz, 2 H, Ar-H), 1.64-1.49 (m, 2 H, CH<sub>2</sub>), 1.48-1.19 (m, 10 H, 3 x CH<sub>2</sub> and CH<sub>3</sub> and OH), 0.90 (t, *J* = 7.0 Hz, 3 H, CH<sub>3</sub>); <sup>13</sup>C NMR (100 MHz, CDCl<sub>3</sub>): δ = 166.0, 151.2, 150.9, 134.7, 131.1, 129.5, 129.2, 128.2, 128.1, 125.7, 121.4, 74.4, 43.1, 32.1, 28.9, 23.6, 22.5, 14.0; MS (ESI) *m/z*: 361 (M+Na)<sup>+</sup>, 339 (M+H)<sup>+</sup>, 321 (M-OH)<sup>+</sup>; IR (neat): ν = 3471, 2930, 2858, 1724, 1485, 1237, 1164, 1054 cm<sup>-1</sup>; HRMS calcd for C<sub>22</sub>H<sub>27</sub>O<sub>3</sub> [M+H]<sup>+</sup>: 339.1955, found: 339.1977.

**(29) Preparation of methyl (*S*, *E*)-4-hydroxy-2-phenylpentadec-2-enoate ((*S*, *E*)-**2u**) (**hcf-2-96**)**

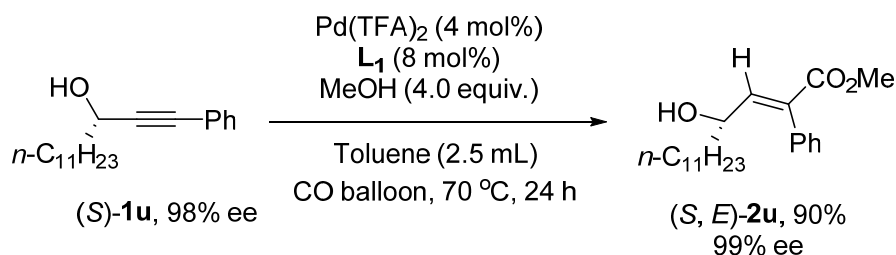

Following **Typical Procedure IV**, the reaction of Pd(TFA)<sub>2</sub> (6.8 mg, 0.02 mmol), **L**<sub>1</sub> (21.9 mg, 0.04 mmol), (*S*)-**1u** (143.2 mg, 98% ee, 0.5 mmol)/toluene (2.0 mL), and MeOH (64.9 mg, 2 mmol)/toluene (0.5 mL) afforded (*S*, *E*)-**2u** (155.8 mg, 90%) as a yellow oil [eluent: petroleum ether/ethyl acetate = 20/1 (525 mL), 10/1 (550 mL), 5/1 (240 mL)]: 99% ee (HPLC conditions: PA-2 column, hexane/*i*-PrOH = 95/5, 1.0 mL/min, λ = 214 nm, *t*<sub>R</sub> (major) = 16.4 min, *t*<sub>R</sub> (minor) = 15.1 min); [α]<sub>D</sub><sup>20</sup> = -20.9 (*c* = 1.02, CHCl<sub>3</sub>); <sup>1</sup>H NMR (400 MHz, CDCl<sub>3</sub>): δ = 7.44-7.30 (m, 3 H, Ar-H), 7.24-7.13 (m, 2 H, Ar-H), 6.92 (d, *J* = 9.6 Hz, 1 H, =CH), 4.13 (q, *J* = 7.5 Hz, 1 H, CH), 3.75 (s, 3 H, CO<sub>2</sub>Me), 1.76-1.44 (m, 3 H, CH<sub>2</sub> and OH), 1.41-1.11 (m, 18 H, 9 x CH<sub>2</sub>), 0.88 (t, *J* = 6.8 Hz, 3 H, CH<sub>3</sub>); <sup>13</sup>C NMR (100 MHz, CDCl<sub>3</sub>): δ = 167.5, 145.2, 134.5, 134.1, 129.4, 128.1, 127.8, 68.6, 52.3, 36.7, 31.9, 29.6, 29.5, 29.4, 29.34, 29.30, 25.0, 22.7,

14.1; **MS** (EI 70 ev)  $m/z$  (%): 346 ( $M^+$ , 1.23), 103 (100); **IR** (neat):  $\nu = 3434, 2922, 2853, 1720, 1462, 1435, 1236, 1195, 1175, 1024 \text{ cm}^{-1}$ ; **HRMS** calcd for  $C_{22}H_{34}O_3$   $[M]^+$ : 346.2508, found: 346.2510.

**(30) Preparation of methyl (*S, E*)-2-(4-bromophenyl)-4-hydroxypentadec-2-enoate ((*S, E*)-**2x**) (**hcf-2-118**)**

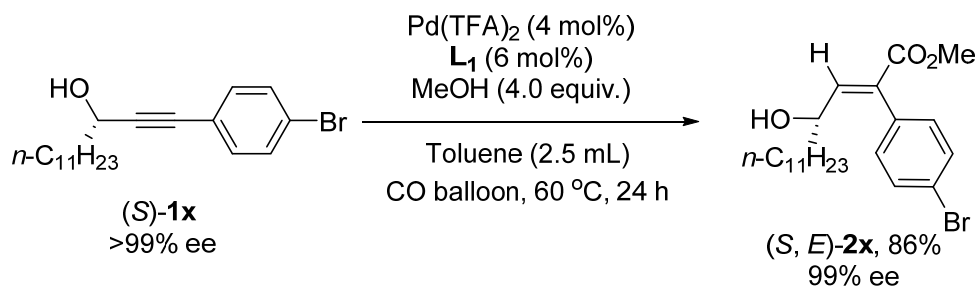

Following **Typical Procedure IV**, the reaction of  $\text{Pd(TFA)}_2$  (6.8 mg, 0.02 mmol),  $L_1$  (16.4 mg, 0.03 mmol), (*S*)-**1x** (182.7 mg, >99% ee, 0.5 mmol), and MeOH (64.9 mg, 2 mmol)/toluene (2.5 mL) afforded (*S, E*)-**2x** (182.9 mg, 86%) as a yellow oil [eluent: petroleum ether/ethyl acetate = 20/1 (525 mL), 10/1 (550 mL)]: 99% ee (HPLC conditions: AS-H column, hexane/*i*-PrOH = 97/3, 1.0 mL/min,  $\lambda = 214 \text{ nm}$ ,  $t_R$  (major) = 8.6 min,  $t_R$  (minor) = 7.4 min);  $[\alpha]_D^{20} = -24.3$  ( $c = 1.01$ ,  $\text{CHCl}_3$ );  **$^1\text{H NMR}$**  (400 MHz,  $\text{CDCl}_3$ ):  $\delta = 7.49$  (d,  $J = 8.4 \text{ Hz}$ , 2 H, Ar-H), 7.06 (d,  $J = 8.4 \text{ Hz}$ , 2 H, Ar-H), 6.92 (d,  $J = 9.6 \text{ Hz}$ , 1 H, =CH), 4.08 (q,  $J = 7.5 \text{ Hz}$ , 1 H, CH), 3.74 (s, 3 H,  $\text{CO}_2\text{Me}$ ), 2.24 (brs, 1 H, OH), 1.67-1.03 (m, 20 H, 10 x  $\text{CH}_2$ ), 0.88 (t,  $J = 6.8 \text{ Hz}$ , 3 H,  $\text{CH}_3$ );  **$^{13}\text{C NMR}$**  (100 MHz,  $\text{CDCl}_3$ ):  $\delta = 167.0, 145.8, 133.4, 132.9, 131.2, 131.1, 122.0, 68.5, 52.3, 36.7, 31.8, 29.54, 29.53, 29.48, 29.4, 29.30, 29.26, 24.9, 22.6, 14.0$ ; **MS** (EI 70 ev)  $m/z$  (%): 426 ( $M^+$ ( $^{81}\text{Br}$ ), 0.96), 424 ( $M^+$ ( $^{79}\text{Br}$ ), 1.12), 43 (100); **IR** (neat):  $\nu = 3428, 2922, 2852, 1720, 1487, 1435, 1236, 1071, 1032, 1010 \text{ cm}^{-1}$ ; **HRMS** calcd for  $C_{22}H_{33}^{79}\text{BrO}_3$   $[M]^+$ : 424.1613, found: 424.1615.

**(31) Preparation of methyl (*R, E*)-4-hydroxy-2,4-diphenylbut-2-enoate ((*R, E*)-**2v**) (**hcf-2-132**)**

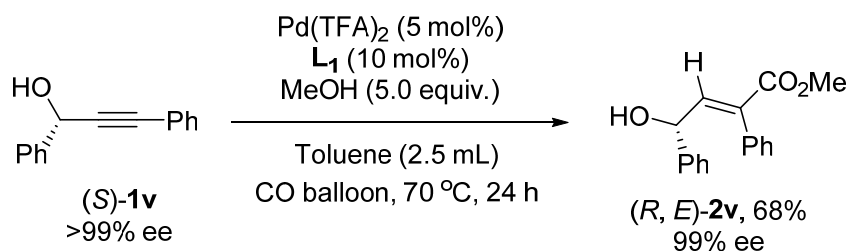

Following **Typical Procedure IV**, the reaction of Pd(TFA)<sub>2</sub> (8.5 mg, 0.025 mmol), **L**<sub>1</sub> (27.3 mg, 0.05 mmol), (*S*)-**1v** (104.2 mg, >99% ee, 0.5 mmol)/toluene (2.0 mL), and MeOH (80.9 mg, 2.5 mmol)/toluene (0.5 mL) afforded (*R*, *E*)-**2v** (91.3 mg, 68%) as a yellow oil [eluent: petroleum ether/ethyl acetate = 10/1 (550 mL), 5/1 (600 mL)]: 99% ee (HPLC conditions: PA-2 column, hexane/*i*-PrOH = 80/20, 0.7 mL/min,  $\lambda = 214$  nm,  $t_R$  (major) = 14.0 min,  $t_R$  (minor) = 17.0 min);  $[\alpha]_D^{20} = +157.6$  ( $c = 1.01$ , CHCl<sub>3</sub>); **<sup>1</sup>H NMR** (400 MHz, CDCl<sub>3</sub>):  $\delta = 7.48$ -7.24 (m, 8 H, Ar-H), 7.24-7.11 (m, 3 H, Ar-H and =CH), 5.19 (d,  $J = 9.2$  Hz, 1 H, CH), 3.73 (s, 3 H, CO<sub>2</sub>Me), 2.13 (br, 1 H, OH); **<sup>13</sup>C NMR** (100 MHz, CDCl<sub>3</sub>):  $\delta = 167.4$ , 143.4, 141.7, 134.3, 134.0, 129.5, 128.8, 128.2, 128.1, 126.3, 71.0, 52.3; **MS** (EI 70 ev)  $m/z$  (%): 269 ( $M^+ + 1$ , 1.51), 268 ( $M^+$ , 7.65), 105 (100); **IR** (neat):  $\nu = 3417$ , 1696, 1641, 1490, 1442, 1228 cm<sup>-1</sup>; **HRMS** calcd for C<sub>17</sub>H<sub>16</sub>O<sub>3</sub> [ $M$ ]<sup>+</sup>: 268.1099, found: 268.1097.

**(32) Preparation of methyl (*R*, *E*)-4-hydroxy-2-(4-methoxyphenyl)-4-phenylbut-2-enoate ((*R*, *E*)-**2w**) (hcf-2-152)**

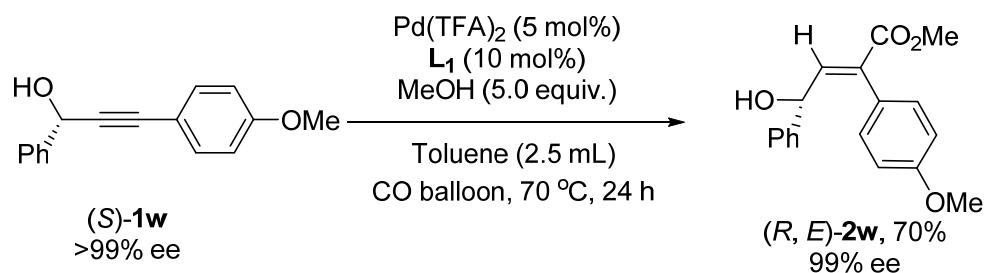

Following **Typical Procedure IV**, the reaction of Pd(TFA)<sub>2</sub> (8.5 mg, 0.025 mmol), **L**<sub>1</sub> (27.3 mg, 0.05 mmol), (*S*)-**1w** (119.1 mg, >99% ee, 0.5 mmol)/toluene (2.0 mL), and MeOH (81.1 mg, 2.5 mmol)/toluene (0.5 mL) afforded (*R*, *E*)-**2w** (104.4 mg, 70%) as a yellow oil [eluent: petroleum ether/ethyl acetate = 10/1 (440 mL), 5/1 (600 mL)]: 99% ee (HPLC conditions: PC-2 column, hexane/*i*-PrOH = 50/50, 0.8 mL/min,  $\lambda = 214$  nm,  $t_R$  (major) = 7.9 min,  $t_R$  (minor) = 13.0 min);  $[\alpha]_D^{21} = +196.5$  ( $c = 0.80$ , CHCl<sub>3</sub>); **<sup>1</sup>H NMR** (400 MHz, CDCl<sub>3</sub>):  $\delta = 7.41$ -7.22 (m, 5 H, Ar-H), 7.20-7.06 (m, 3 H, Ar-H and =CH), 6.90 (d,  $J = 8.4$  Hz, 2 H, Ar-H), 5.20 (d,  $J = 9.2$  Hz, 1 H, CH), 3.81 (s, 3 H, CO<sub>2</sub>Me), 3.71 (s, 3 H, OMe), 2.62-2.34 (m, 1 H, OH); **<sup>13</sup>C NMR** (100 MHz, CDCl<sub>3</sub>):  $\delta = 167.6$ , 159.2, 143.2, 141.9, 133.5, 130.8, 128.7, 128.0, 126.4, 126.3, 113.5, 70.9, 55.2, 52.3; **MS** (EI 70 ev)  $m/z$  (%): 299 ( $M^+ + 1$ , 1.90), 298 ( $M^+$ ,



9.21), 105 (100); **IR** (neat):  $\nu = 3424, 3015, 2947, 2837, 1707, 1508, 1444, 1234, 1174, 1017 \text{ cm}^{-1}$ ; **HRMS** calcd for  $\text{C}_{18}\text{H}_{18}\text{O}_4$   $[\text{M}]^+$ : 298.1205, found: 298.1202.

**(33) Preparation of methyl (*S, E*)-4-hydroxy-4-methyl-2-phenylnon-2-enoate ((*S, E*)-**2k**) (hcf-2-128)**

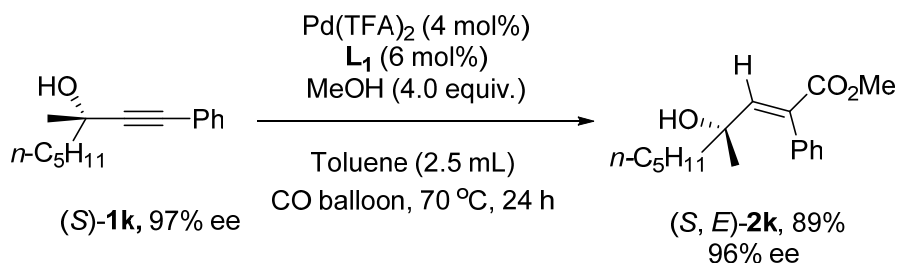

Following **Typical Procedure IV**, the reaction of  $\text{Pd(TFA)}_2$  (6.8 mg, 0.02 mmol),  $\text{L}_1$  (16.4 mg, 0.03 mmol), (*S*)-**1k** (108.2 mg, 97% ee, 0.5 mmol)/toluene (2.0 mL), and MeOH (64.9 mg, 2 mmol)/toluene (0.5 mL) afforded (*S, E*)-**2k** (123.1 mg, 89%) as a yellow oil [eluent: petroleum ether/ethyl acetate = 20/1 (420 mL), 10/1 (440 mL)]: 96% ee (HPLC conditions: PA-2 column, hexane/*i*-PrOH = 95/5, 1.0 mL/min,  $\lambda = 214 \text{ nm}$ ,  $t_R$  (major) = 18.2 min,  $t_R$  (minor) = 13.9 min);  $[\alpha]_D^{20} = +15.6$  ( $c = 1.01, \text{CHCl}_3$ );  **$^1\text{H NMR}$**  (400 MHz,  $\text{CDCl}_3$ ):  $\delta = 7.42\text{-}7.30$  (m, 3 H, Ar-H), 7.24-7.16 (m, 2 H, Ar-H), 7.08 (s, 1 H, =CH), 3.70 (s, 3 H,  $\text{CO}_2\text{Me}$ ), 1.57-1.44 (m, 2 H,  $\text{CH}_2$ ), 1.44-1.16 (m, 10 H, 3 x  $\text{CH}_2$  and  $\text{CH}_3$  and OH), 0.88 (t,  $J = 7.4 \text{ Hz}$ , 3 H,  $\text{CH}_3$ );  **$^{13}\text{C NMR}$**  (100 MHz,  $\text{CDCl}_3$ ):  $\delta = 167.9, 149.6, 135.0, 131.3, 129.4, 128.1, 127.8, 74.2, 52.3, 43.1, 32.0, 28.9, 23.6, 22.5, 14.0$ ; **MS** (ESI)  $m/z$ : 299 ( $\text{M}+\text{Na}^+$ ), 259 ( $\text{M}-\text{OH}^+$ ); **IR** (neat):  $\nu = 3495, 2953, 2931, 2860, 1716, 1458, 1435, 1237, 1196, 1020 \text{ cm}^{-1}$ ; **HRMS** calcd for  $\text{C}_{17}\text{H}_{24}\text{O}_3$   $[\text{M}]^+$ : 276.1725, found: 276.1722.

## 6. Synthetic applications

**(1) Preparation of methyl (*E*)-4-hydroxy-2-(4'-methoxy-[1,1'-biphenyl]-4-yl)-4-methylnon-2-enoate ((*E*)-**7**)<sup>5</sup> (hcf-2-98)**

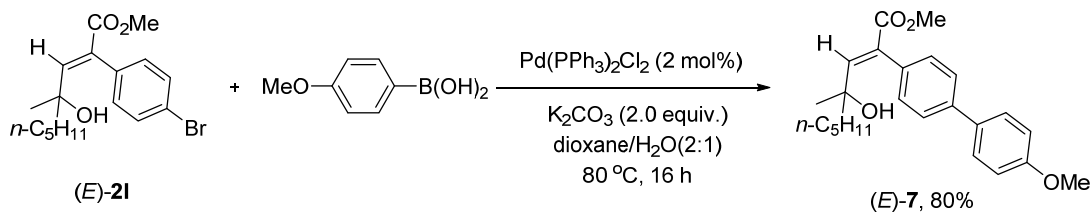

To a flame-dried Schlenk tube were added  $\text{Pd(PPh}_3)_2\text{Cl}_2$  (7.0 mg, 0.01 mmol), (4-methoxyphenyl)boronic acid (116.3 mg, 0.75 mmol), potassium carbonate (138.2 mg, 1.0 mmol), (E)-**21** (177.5 mg, 0.5 mmol)/1,4-dioxane (2.5 mL), and  $\text{H}_2\text{O}$  (1.25 mL) sequentially under argon. The resulting mixture was stirred at 80 °C for 16 h and then diluted with 3 mL of ethyl acetate, filtered through a short column silica gel (3 cm) eluted with ethyl acetate (20 x 2 mL), and concentrated. The residue was purified by column chromatography on silica gel to afford (E)-**7** (152.8 mg, 80%) as a yellow oil [eluent: petroleum ether/ethyl acetate = 50/1 (510 mL), 20/1 (525 mL), 10/1 (550 mL), 5/1 (240 mL)]:  $^1\text{H NMR}$  (400 MHz,  $\text{CDCl}_3$ ):  $\delta$  = 7.60-7.49 (m, 4 H, Ar-H), 7.31-7.20 (m, 2 H, Ar-H), 7.10 (s, 1 H, =CH), 6.98 (d,  $J$  = 8.8 Hz, 2 H, Ar-H), 3.85 (s, 3 H,  $\text{CO}_2\text{Me}$ ), 3.73 (s, 3 H, OMe), 1.60-1.49 (m, 2 H,  $\text{CH}_2$ ), 1.45 (s, 1 H, OH), 1.42-1.18 (m, 9 H, 3 x  $\text{CH}_2$  and  $\text{CH}_3$ ), 0.89 (t,  $J$  = 7.0 Hz, 3 H,  $\text{CH}_3$ );  $^{13}\text{C NMR}$  (100 MHz,  $\text{CDCl}_3$ ):  $\delta$  = 168.0, 159.2, 149.7, 140.3, 133.2, 133.0, 131.1, 129.9, 128.1, 126.4, 114.2, 74.3, 55.3, 52.4, 43.2, 32.1, 29.0, 23.7, 22.6, 14.0; **MS** (EI 70 ev)  $m/z$  (%): 383 ( $\text{M}^+ + 1$ , 6.42), 382 ( $\text{M}^+$ , 24.86), 279 (100); **IR** (neat):  $\nu$  = 3509, 2952, 2931, 2859, 1713, 1608, 1497, 1241, 1176, 1038  $\text{cm}^{-1}$ ; **HRMS** calcd for  $\text{C}_{24}\text{H}_{30}\text{O}_4$  [ $\text{M}]^+$ : 382.2144, found: 382.2141.

**(2) Preparation of (E)-2-(4-bromophenyl)-4-hydroxy-4-methylnon-2-enoic acid ((E)-8)<sup>6</sup> (hcf-2-130)**

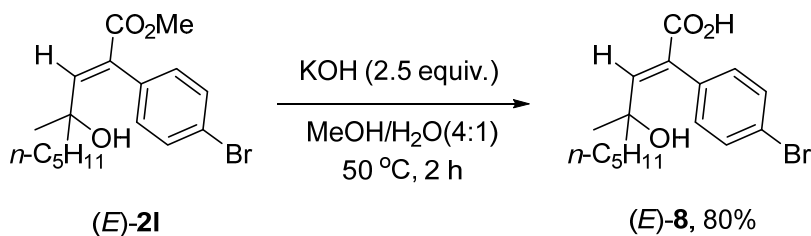

To a flame-dried Schlenk tube were added  $\text{KOH}$  (70.1 mg, 1.25 mmol), (E)-**21** (177.6 mg, 0.5 mmol)/MeOH (1 mL), and  $\text{H}_2\text{O}$  (0.25 mL) sequentially. The Schlenk

tube was placed in an oil bath pre-heated at 50 °C and stirred for 2 h. To the mixture was added H<sub>2</sub>O (5 mL), the organic layer was then washed with 3 N HCl (10 mL), extracted with ethyl acetate (5 mL x 3), washed with brine (10 mL), and dried over anhydrous Na<sub>2</sub>SO<sub>4</sub>. After filtration and concentration under reduced pressure, the crude product was purified by column chromatography on silica gel to afford (*E*)-**8** (136.5 mg, 80%) as a white solid [eluent: dichloromethane (200 mL) to dichloromethane/MeOH = 20:1]: m.p. 123.7-124.4 °C (petroleum ether/dichloromethane); <sup>1</sup>H NMR (400 MHz, DMSO-*D*<sub>6</sub>): δ = 12.53 (s, 1 H, COOH), 7.49 (d, *J* = 8.4 Hz, 2 H, Ar-H), 7.05 (d, *J* = 8.0 Hz, 2 H, Ar-H), 6.98 (s, 1 H, =CH), 4.50 (s, 1 H, OH), 1.38-1.06 (m, 8 H, 4 x CH<sub>2</sub>), 1.00 (s, 3 H, CH<sub>3</sub>), 0.83 (t, *J* = 7.4 Hz, 3 H, CH<sub>3</sub>); <sup>13</sup>C NMR (100 MHz, DMSO-*D*<sub>6</sub>): δ = 168.4, 151.2, 135.9, 131.9, 130.5, 130.3, 120.3, 72.2, 42.5, 31.9, 28.6, 23.3, 22.2, 14.1; MS (ESI) *m/z*: 325 (M(<sup>81</sup>Br)-OH)<sup>+</sup>, 323 (M(<sup>79</sup>Br)-OH)<sup>+</sup>; IR (neat): ν = 3387, 2961, 2926, 2870, 2855, 2584, 1693, 1630, 1488, 1232, 1148, 1009 cm<sup>-1</sup>; Anal. Calcd. for C<sub>16</sub>H<sub>21</sub><sup>79</sup>BrO<sub>3</sub>: C 56.32, H 6.20; found C 55.95, H 6.25.

**(3) Preparation of (*E*)-2-(4-bromophenyl)-4-hydroxy-4-methylnon-2-enoic acid ((*E*)-**9**)<sup>7</sup> (hcf-2-134)**

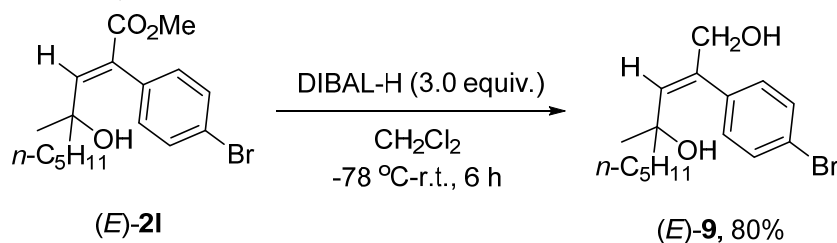

To a flame-dried Schlenk tube were added (*E*)-**21** (177.6 mg, 0.5 mmol)/dichloromethane (5 mL). Then the resulting mixture was stirred at -78 °C with a balloon of argon for 10 min. After that, DIBAL-H (1.0 M in toluene, 1.5 mL, 1.5 mmol, 3.0 equiv.) was added dropwise within 5 mins. After 3 hours, the resulting mixture was warmed up to room temperature and stirred at room temperature for 3h as monitored by TLC. A saturated aqueous solution of potassium sodium tartrate (10 mL) was added with a cooling bath of ice-water. The resulting mixture was then stirred at room temperature for 2 h. The organic layer was separated, and the aqueous layer was extracted with DCM (3 x 5 mL). The combined organic layer was washed

with brine (10 mL) and dried with anhydrous Na<sub>2</sub>SO<sub>4</sub>. After filtration and concentration under reduced pressure, the crude product was purified by column chromatography on silica gel to afford (*E*)-**9** (130.8 mg, 80%) as a yellow oil [eluent: petroleum ether/ethyl acetate = 10/1 (550 mL), 5/1 (600 mL), 3/1 (200 mL)]: <sup>1</sup>H NMR (400 MHz, CDCl<sub>3</sub>): δ = 7.48 (d, *J* = 8.4 Hz, 2 H, Ar-H), 7.09 (d, *J* = 8.0 Hz, 2 H, Ar-H), 5.78 (s, 1 H, =CH), 4.17 (d, *J* = 5.2 Hz, 2 H, =CH<sub>2</sub>), 1.62-1.51 (m, 1 H, OH), 1.51-1.40 (m, 2 H, CH<sub>2</sub>), 1.37-1.17 (m, 9 H, 3 x CH<sub>2</sub> and CH<sub>3</sub>), 1.16 (s, 1 H, OH), 0.89 (t, *J* = 7.0 Hz, 3 H, CH<sub>3</sub>); <sup>13</sup>C NMR (100 MHz, DMSO-*D*<sub>6</sub>): δ = 137.8, 137.5, 134.3, 131.4, 130.4, 121.5, 73.9, 68.9, 43.7, 32.2, 29.5, 23.7, 22.6, 14.1; MS (ESI) *m/z*: 351 (M(<sup>81</sup>Br)+Na)<sup>+</sup>, 349 (M(<sup>79</sup>Br)+Na)<sup>+</sup>, 293 (M(<sup>81</sup>Br)-OH-H<sub>2</sub>O)<sup>+</sup>, 291 (M(<sup>79</sup>Br)-OH-H<sub>2</sub>O)<sup>+</sup>; IR (neat): ν = 3334, 2954, 2929, 2858, 1897, 1710, 1587, 1486, 1460, 1375, 1148, 1071, 1011 cm<sup>-1</sup>; HRMS calcd for C<sub>16</sub>H<sub>23</sub><sup>79</sup>BrO<sub>2</sub>Na [M+Na]<sup>+</sup>: 349.0774, found: 349.0762.

**(4) Preparation of methyl 4-fluoro-4-methyl-2-(*E*)-2-(4-bromophenyl)-non-2-enoate ((*E*)-**10**)<sup>8</sup> (hcf-2-158)**

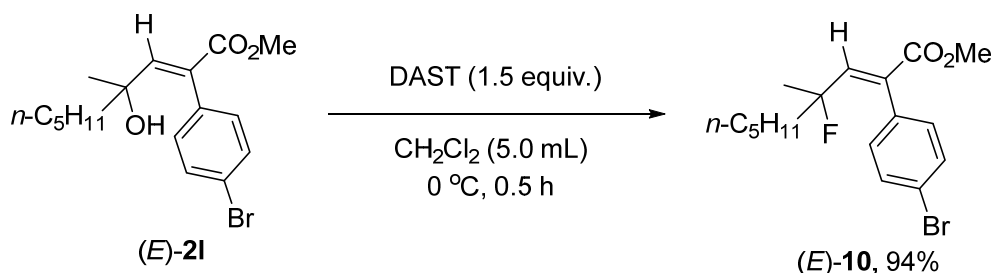

To a flame-dried Schlenk tube was added a solution of (*E*)-**21** (177.9 mg, 0.5 mmol)/dichloromethane (5 mL) under argon. The resulting mixture was stirred at 0 °C for 10 min. The resulting mixture was added DAST (0.1 mL, d = 1.22 g/mL, 122.0 mg, 0.75 mmol) and stirred at 0 °C for 30 min. After that, the reaction mixture was poured into a cold sat. NaHCO<sub>3</sub> solution (30 mL) and extracted with CH<sub>2</sub>Cl<sub>2</sub> (3 x 10 mL), washed with brine (10 mL), and dried over anhydrous Na<sub>2</sub>SO<sub>4</sub>. After filtration and concentration under reduced pressure, the crude product was purified by column chromatography on silica gel to afford (*E*)-**10** (168.1 mg, 94%) as a yellow oil [eluent: petroleum ether/ethyl ether/dichloromethane = 150/1/1]: <sup>1</sup>H NMR (400 MHz, CDCl<sub>3</sub>): δ = 7.46 (d, *J* = 8.0 Hz, 2 H, Ar-H), 7.15-6.96 (m, 3 H,

Ar-H and =CH), 3.72 (s, 3 H, CO<sub>2</sub>Me), 1.71-1.49 (m, 2 H, CH<sub>2</sub>), 1.47-1.14 (m, 9 H, 3 x CH<sub>2</sub> and CH<sub>3</sub>), 0.88 (t, *J* = 7.2 Hz, 3 H, CH<sub>3</sub>); <sup>13</sup>C NMR (100 MHz, CDCl<sub>3</sub>): δ = 167.3, 145.8 (d, *J* = 23.5 Hz), 134.1, 131.7 (d, *J* = 4.6 Hz), 130.9 (d, *J* = 2.2 Hz), 130.7, 121.6, 96.2 (d, *J* = 173.8 Hz), 52.5, 40.6 (d, *J* = 22.8 Hz), 31.8, 26.1 (d, *J* = 24.2 Hz), 23.2 (d, *J* = 3.1 Hz), 22.5, 14.0; <sup>19</sup>F NMR (376 MHz, CDCl<sub>3</sub>): δ = -143.1; MS (EI, 70 ev) *m/z* (%): 358 (M<sup>+</sup>(<sup>81</sup>Br), 45.13), 356 (M<sup>+</sup>(<sup>79</sup>Br), 45.11), 146 (100); IR (neat): ν = 2943, 2862, 1718, 1482, 1442, 1241, 1065, 1014 cm<sup>-1</sup>; HRMS calcd for C<sub>17</sub>H<sub>22</sub><sup>79</sup>BrFO<sub>2</sub> [M]<sup>+</sup>: 356.0787, found: 356.0781.

## 7. Mechanistic studies:

### (1) Reaction of methyl ether **3** (hcf-2-154)

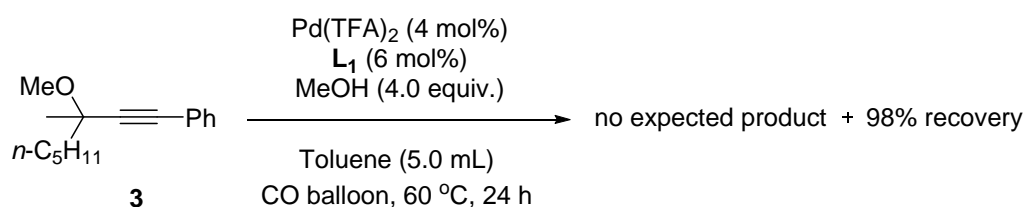

Following **Typical Procedure IV**, the reaction of Pd(TFA)<sub>2</sub> (13.6 mg, 0.04 mmol), L<sub>1</sub> (32.8 mg, 0.06 mmol), **3** (230.4 mg, 1 mmol)/toluene (4.0 mL), and MeOH (130.0 mg, 4 mmol)/toluene (1.0 mL) was conducted for 24 h at 60 °C. Crude <sup>1</sup>H NMR showed that no expected product with 98% recovery of **3**.

### (2) Reaction of acetate **4** (hcf-2-150)

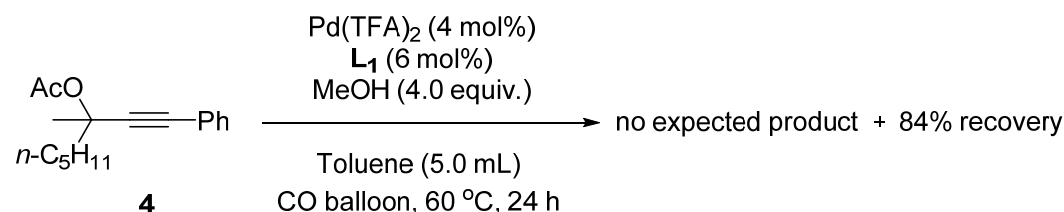

Following **Typical Procedure IV**, the reaction of Pd(TFA)<sub>2</sub> (13.6 mg, 0.04 mmol), L<sub>1</sub> (32.8 mg, 0.06 mmol), **4** (258.6 mg, 1 mmol)/toluene (4.0 mL), and MeOH (129.7 mg, 4 mmol)/toluene (1.0 mL) was conducted for 24 h at 60 °C. Crude <sup>1</sup>H NMR showed that no expected product with 84% recovery of **4**.

### (3) Reaction of internal alkyne **5** (hcf-2-176)

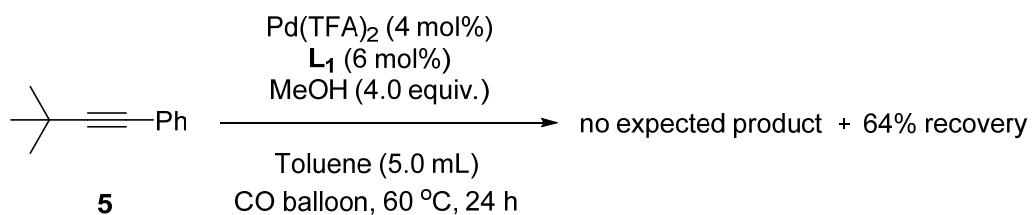

Following **Typical Procedure IV**, the reaction of Pd(TFA)<sub>2</sub> (13.6 mg, 0.04 mmol), L<sub>1</sub> (32.8 mg, 0.06 mmol), **5** (158.1 mg, 1 mmol)/toluene (4.0 mL), and MeOH (130.5 mg, 4 mmol)/toluene (1.0 mL) was conducted for 24 h at 60 °C. Crude <sup>1</sup>H NMR showed that no expected product with 64% recovery of **5**.

#### (4) Preparation of **1k-d** (**hcf-3-169**, **hcf-3-93**)

##### **hcf-3-169:**

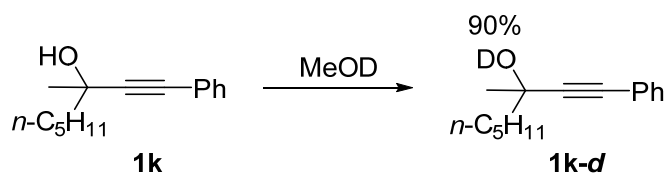

To a solution of **1k** (649.9 mg, 3 mmol) was added MeOD (1 mL) under argon. After shaking the flask at room temperature, the mixture was evaporated under vacuum directly using the vacuum line connected to argon for 30 min. Repeating the process five times afforded **1k-d** as an oil with 90% D incorporation: <sup>1</sup>H NMR (400 MHz, CDCl<sub>3</sub>): δ = 7.45-7.37 (m, 2 H, Ar-H), 7.34-7.27 (m, 3 H, Ar-H), 1.79-1.69 (m, 2 H, CH<sub>2</sub>), 1.63-1.49 (m, 5 H, CH<sub>2</sub> and CH<sub>3</sub>), 1.41-1.29 (m, 4 H, 2 x CH<sub>2</sub>), 0.91 (t, *J* = 7.0 Hz, 3 H, CH<sub>3</sub>). The following signal is discernible for **1k**: δ 2.02 (s, 1 H, OH).

##### **hcf-3-93:**

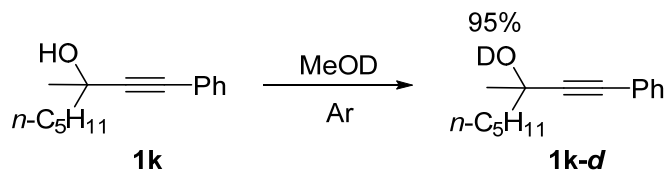

To a solution of **1k** (1.0831 g, 5 mmol) was added MeOD (2 mL) under argon. After shaking the flask at room temperature, the mixture was evaporated under vacuum directly using the vacuum line connected to argon for 30 min. Repeating the process five times afforded **1k-d** as an oil with 95% D incorporation: <sup>1</sup>H NMR (400 MHz, CDCl<sub>3</sub>): δ = 7.46-7.37 (m, 2 H, Ar-H), 7.34-7.27 (m, 3 H, Ar-H), 1.80-1.69 (m,

2 H, CH<sub>2</sub>), 1.64-1.46 (m, 5 H, CH<sub>2</sub> and CH<sub>3</sub>), 1.43-1.27 (m, 4 H, 2 x CH<sub>2</sub>), 0.91 (t, *J* = 6.4 Hz, 3 H, CH<sub>3</sub>). The following signal is discernible for **1k**: δ 2.06 (s, 1 H, OH).

**(5) Reaction of 1k with MeOD (hcf-2-182B)**

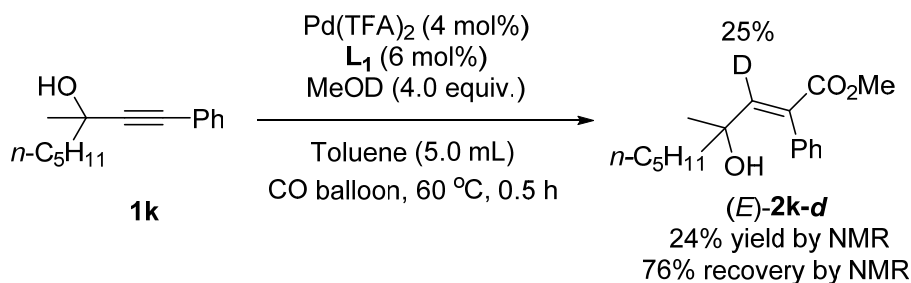

To a flame-dried Schlenk tube were added Pd(TFA)<sub>2</sub> (13.6 mg, 0.04 mmol), **L**<sub>1</sub> (32.8 mg, 0.06 mmol), **1k** (216.2 mg, 1 mmol)/toluene (4 mL), and MeOD (132.7 mg, 4.0 mmol)/toluene (1 mL) sequentially under argon. The resulting mixture was then frozen with a liquid nitrogen bath, degassed to remove the argon inside completely, and refilled with CO by a balloon of CO for three times. Then the resulting mixture was stirred at 60 °C with a balloon of CO for 0.5 h. After that, the resulting mixture was diluted with 3 mL of ethyl acetate, filtered through a short column of silica gel (3 cm) eluted with ethyl acetate (20 x 2 mL), and concentrated to afford the crude product. (*E*)-**2k-d** (25% deuterium incorporation) was formed as determined by NMR analysis of the crude product by using CH<sub>2</sub>Br<sub>2</sub> as the internal standard.

**(6) Reaction of 1k-d with MeOD (hcf-3-170)**

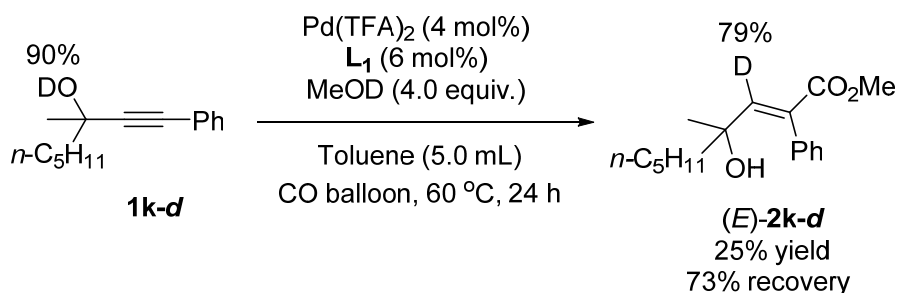

To a flame-dried Schlenk tube were added Pd(TFA)<sub>2</sub> (13.6 mg, 0.04 mmol), **L**<sub>1</sub> (32.8 mg, 0.06 mmol), **1k-d** (217.1 mg, 1 mmol, 90% deuterium incorporation)/toluene (4 mL), MeOD (132.9 mg, 4.0 mmol)/toluene (1 mL) sequentially in a glove box. The resulting mixture was then frozen with a liquid nitrogen bath, degassed to remove the

nitrogen inside completely, and refilled with CO by a balloon of CO for three times. Then the resulting mixture was stirred at 60 °C with a balloon of CO for 24 h. After that, the resulting mixture was diluted with 3 mL of ethyl acetate, filtered through a short column of silica gel (3 cm) eluted with ethyl acetate (20 x 2 mL), and concentrated. The residue was purified by column chromatography on silica gel to afford (*E*)-**2k-d** (69.7 mg, 25%) as a yellow oil [eluent: petroleum ether/ethyl acetate = 20/1 (630 mL), 10/1 (220 mL)]: **<sup>1</sup>H NMR** (400 MHz, CDCl<sub>3</sub>): δ = 7.41-7.29 (m, 3 H, Ar-H), 7.24-7.14 (m, 2 H, Ar-H), 3.69 (s, 3 H, CO<sub>2</sub>Me), 1.56-1.44 (m, 2 H, CH<sub>2</sub>), 1.44-1.14 (m, 10 H, 3 x CH<sub>2</sub> and CH<sub>3</sub> and OH), 0.88 (t, *J* = 7.0 Hz, 3 H, CH<sub>3</sub>), the following signal is discernible for (*E*)-**2k**: δ 7.08 (s, 1 H, =CH); **<sup>13</sup>C NMR** (100 MHz, CDCl<sub>3</sub>): δ = 167.9, 149.2 (*J* = 23.3 Hz), 135.0, 131.3, 129.4, 128.1, 127.8, 74.1, 52.3, 43.1, 32.0, 28.9, 23.6, 22.5, 14.0; the following signal is discernible for (*E*)-**2k**: 149.6, 135.05, 131.4, 74.2; **MS** (ESI) *m/z*: 300 (M+Na)<sup>+</sup>, 260 (M-OH)<sup>+</sup>; **IR** (neat): ν = 3487, 2954, 2931, 2860, 1717, 1434, 1226, 1022 cm<sup>-1</sup>; **HRMS** calcd for C<sub>17</sub>H<sub>23</sub>DO<sub>3</sub>Na [M+Na]<sup>+</sup>: 300.1680, found: 300.1672.

#### (7) **<sup>1</sup>H-NMR spectra of 1k with different amount of methanol (hcf-2-188)**

**1k** (21.6 mg, 0.1 mmol) was dissolved in Tol-*d*<sub>8</sub> (0.5 mL), the <sup>1</sup>H-NMR spectrum was shown as hcf-2-188-1. Then, 1 equiv. of MeOH (4 μL, 0.1 mmol) was added to obtain <sup>1</sup>H-NMR spectra as hcf-2-188-2. This operation was repeated for three times to the same NMR tube, the spectra are hcf-2-188-3, hcf-2-188-4, and hcf-2-188-5. An obvious shift of the hydroxy signal was observed.

#### (8) **<sup>1</sup>H-NMR spectra of methanol with different amount of 1k (hcf-2-188C)**

Methanol (16 μL, 0.4 mmol) was dissolved in Tol-*d*<sub>8</sub> (0.5 mL), the <sup>1</sup>H-NMR spectrum was shown as hcf-2-188C-1. Then, 0.25 equiv. of **1k** (5.4 mg, 0.1 mmol) was added to obtain <sup>1</sup>H-NMR spectra as hcf-2-188C-5. This operation was repeated for three times to the same NMR tube, the spectra are hcf-2-188C-6, hcf-2-188C-7, and hcf-2-188C-8, an obvious shift of the hydroxy signal was observed.

#### (9) **Kinetic Experiments (hcf-3-161)**



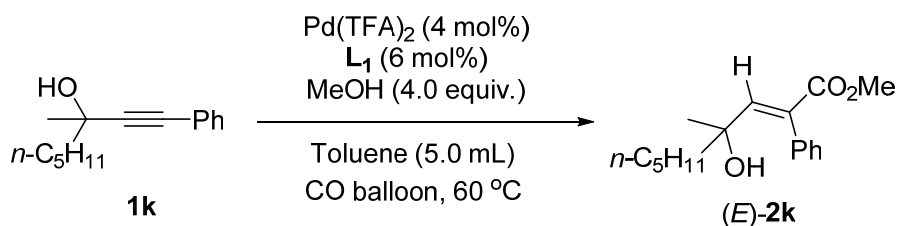

To a flame-dried Schlenk tube were added Pd(TFA)<sub>2</sub> (13.6 mg, 0.04 mmol), **L**<sub>1</sub> (32.8 mg, 0.06 mmol), **1k** (216.3 mg, 1 mmol)/toluene (2 mL), MeOH (128.8 mg, 4.0 mmol)/toluene (2 mL), and diphenylmethane (the internal standard, 83.6 μL, d = 1.006 g/mL, 84.1 mg, 0.5 mmol)/toluene (1 mL) sequentially under argon. The resulting mixture was then frozen with a liquid nitrogen bath, degassed to remove the argon inside completely, and refilled with CO by a balloon of CO for three times. Then the resulting mixture was stirred at 60 °C with a balloon of CO and monitored at different time (see Table S4). The yields were determined by <sup>1</sup>H NMR measurement using diphenylmethane as the internal standard.

**Table S4.** For **1k**:

| Time / h | Yield of ( <i>E</i> )- <b>2k</b> |
|----------|----------------------------------|
| 2        | 40                               |
| 4        | 54                               |
| 6        | 65                               |
| 8        | 73                               |
| 12       | 84                               |
| 16       | 90                               |
| 20       | 95                               |
| 24       | 97                               |

A linear relationship was obtained for  $\ln \{c_0/(c_0-[(E)\text{-}2\mathbf{k}])\}$  vs. reaction time, indicating a first-order dependence of reaction rate with respect to propargylic alcohol in the rate-determining step (Figures S3).

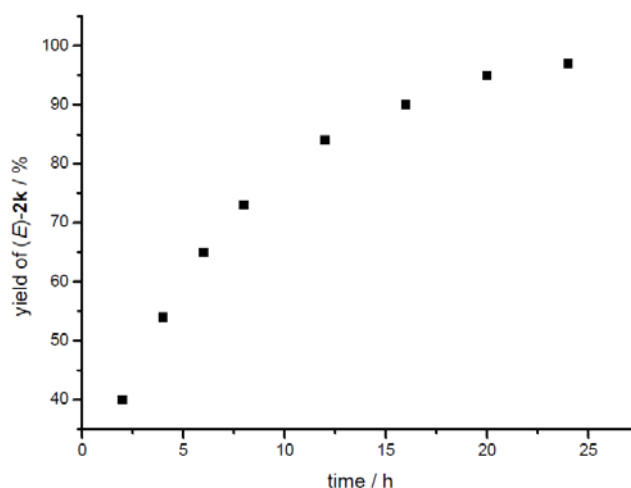

(a) yield of (*E*)-**2k** vs. time

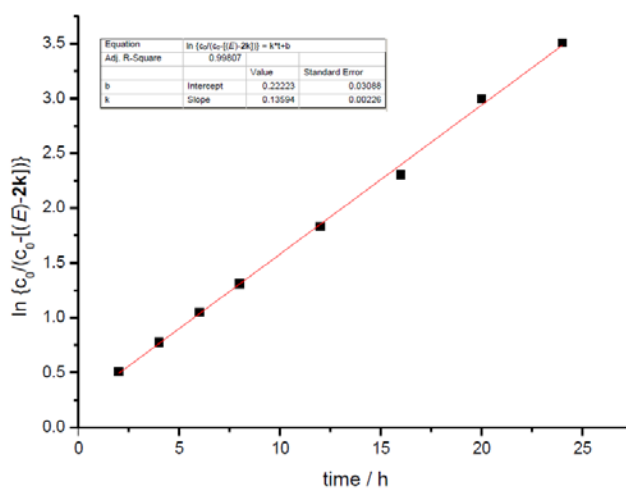

(b)  $\ln \{c_0/(c_0 - [(E)\text{-}2\mathbf{k}])\}$  vs. time (R-square is the coefficient of determination)

**Figure S3.** Determination of the reaction order on propargylic alcohol

### (10) Kinetic Experiments (hcf-3-162)

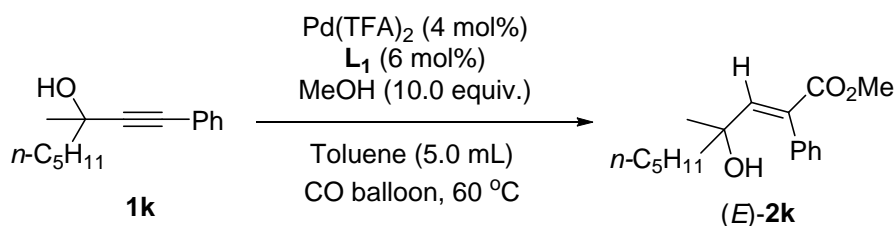

To a flame-dried Schlenk tube were added  $\text{Pd(TFA)}_2$  (13.6 mg, 0.04 mmol),  $\mathbf{L}_1$  (32.8 mg, 0.06 mmol),  $\mathbf{1k}$  (216.3 mg, 1 mmol)/toluene (2 mL), MeOH (321.4 mg, 10.0 mmol)/toluene (2 mL), and diphenylmethane (the internal standard, 83.6  $\mu\text{L}$ ,  $d = 1.006 \text{ g/mL}$ , 84.1 mg, 0.5 mmol)/toluene (1 mL) sequentially under argon. The resulting mixture was then frozen with a liquid nitrogen bath, degassed to remove the

argon inside completely, and refilled with CO by a balloon of CO for three times. Then the resulting mixture was stirred at 60 °C with a balloon of CO and monitored at different time (see Table S5). The yields were determined by  $^1\text{H}$  NMR measurement using diphenylmethane as the internal standard.

**Table S5.** For **1k**:

| Time / h | Yield of ( <i>E</i> )- <b>2k</b> |
|----------|----------------------------------|
| 2        | 67                               |
| 4        | 80                               |
| 6        | 86                               |
| 8        | 90                               |
| 12       | 95                               |
| 16       | 98                               |

A linear relationship was obtained for  $\ln \{c_0/(c_0-[(E)\text{-}2\mathbf{k}])\}$  vs. reaction time, indicating a first-order dependence of reaction rate with respect to propargylic alcohol in the rate-determining step (Figures S4).

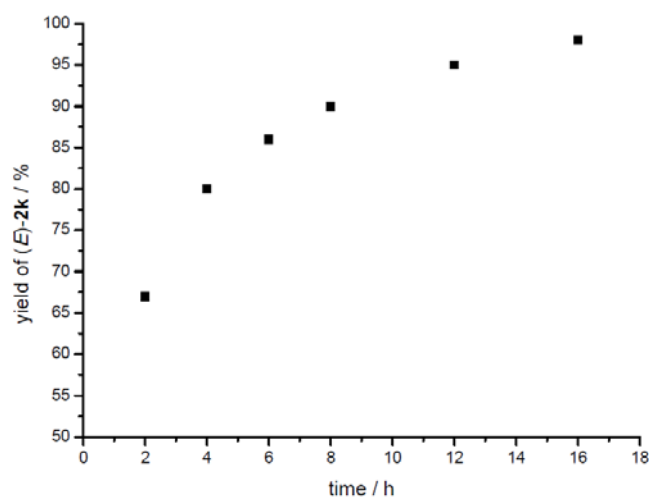

(a) yield of (*E*)-**2k** vs. time

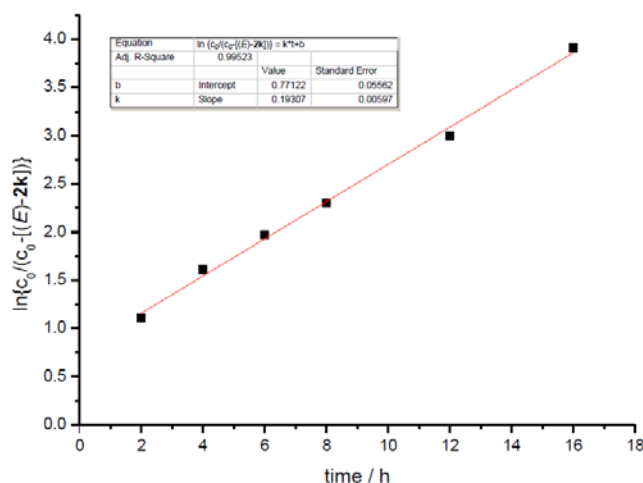

(b)  $\ln \{c_0/(c_0-[(E)-2k])\}$  vs. time (R-square is the coefficient of determination)

**Figure S4.** Determination of the reaction order on propargylic alcohol-10.0-fold MeOH

### (11) Measuring the rate of H/D-scrambling (hcf-3-109)

To a solution of **1k** (8.2 mg, 0.038 mmol) in  $\text{CDCl}_3$  (1 mL) was added MeOD (6.5  $\mu\text{L}$ , 0.813 g/mL, 0.16 mmol), then the mixture was subjected to  $^1\text{H}$  NMR analysis immediately, the H/D-exchange process was found to reach equilibrium state within 3 minutes.

### (12) Kinetic Isotope Effect (KIE) Experiments (hcf-3-99, 100)

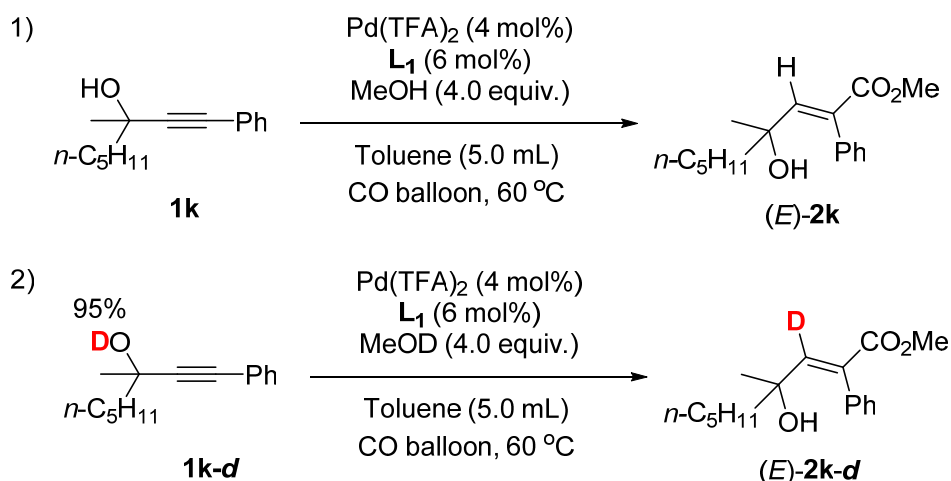

parallel reaction,  $\text{KIE} = k_{\text{H}}/k_{\text{D}} = 16$

To a flame-dried Schlenk tube were added  $\text{Pd}(\text{TFA})_2$  (13.6 mg, 0.04 mmol),  $\text{L}_1$  (32.8 mg, 0.06 mmol), **1k** (216.3 mg, 1 mmol)/toluene (3 mL), MeOH (128.7 mg, 4.0 mmol)/toluene (1 mL), and diphenylmethane (the internal standard, 83.6  $\mu\text{L}$ ,  $d =$

1.006 g/mL, 84.1 mg, 0.5 mmol)/toluene (1 mL) sequentially in a glove box. The resulting mixture was then frozen with a liquid nitrogen bath, degassed to remove the nitrogen inside completely, and refilled with CO by a balloon of CO for three times. Then the resulting mixture was stirred at 60 °C with a balloon of CO and monitored at different time (see Table S6). The yields were determined by <sup>1</sup>H NMR measurement using diphenylmethane as the internal standard.

**Table S6.** For **1k**:

| Time/h                                  | 1  | 1.5 | 2  | 3  | 4  |
|-----------------------------------------|----|-----|----|----|----|
| NMR yield of ( <i>E</i> )- <b>2k</b> /% | 27 | 32  | 36 | 43 | 53 |

Due to the nature of the experiment, plots to determine the KIE were taken for **1k** (Figure S5).

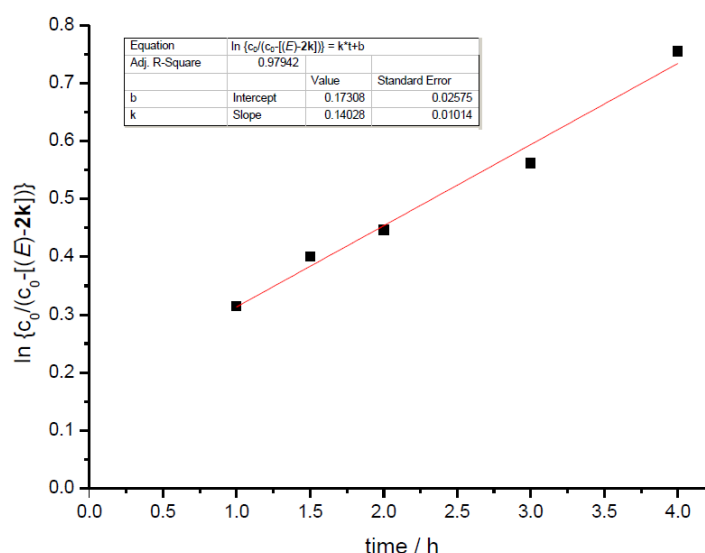

**Figure S5.** Linear function fit for reaction rate of **1k** to obtain  $k_H$

To another dried Schlenk tube were added Pd(TFA)<sub>2</sub> (13.6 mg, 0.04 mmol), **L1** (32.8 mg, 0.06 mmol), **1k-d** (217.2 mg, 1 mmol, 95% deuterium incorporation)/toluene (3 mL), MeOD (132.6 mg, 4.0 mmol)/toluene (1 mL), and diphenylmethane (the internal standard, 83.6 μL, d = 1.006 g/mL, 84.1 mg, 0.5 mmol)/toluene (1 mL) sequentially in a glove box. The resulting mixture was then frozen with a liquid nitrogen bath, degassed to remove the nitrogen inside completely, and refilled with CO by a balloon of CO for three times. Then the resulting mixture

was stirred at 60 °C with a balloon of CO and monitored at different time (see Table S7). The yields were determined by <sup>1</sup>H NMR measurement using diphenylmethane as the internal standard.

**Table S7.** For **1k-d**:

| Time/h                                    | 1.5 | 2   | 3    | 4  | 5    |
|-------------------------------------------|-----|-----|------|----|------|
| NMR yield of ( <i>E</i> )- <b>2k-d</b> /% | 9.0 | 9.5 | 10.2 | 11 | 11.8 |

Due to the nature of the experiment, plots to determine the KIE were taken for **1k-d** (Figure S6).

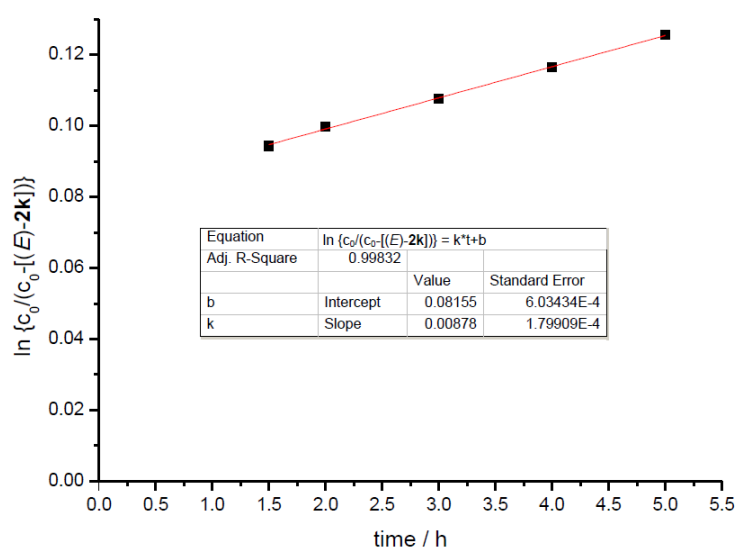

**Figure S6.** Linear function fit for reaction rate of **1k-d** to obtain  $k_D$

Finally, the intermolecular isotope effect value is determined as 16.

$$k_H/k_D = (0.14028)/(0.00878) = 16$$

**(13) Preparation of methyl (*E*)-2-(methoxycarbonylphenyl)-4-hydroxy-4-methylnon-2-enoate ((*E*)-**2y**) (hcf-3-155)**

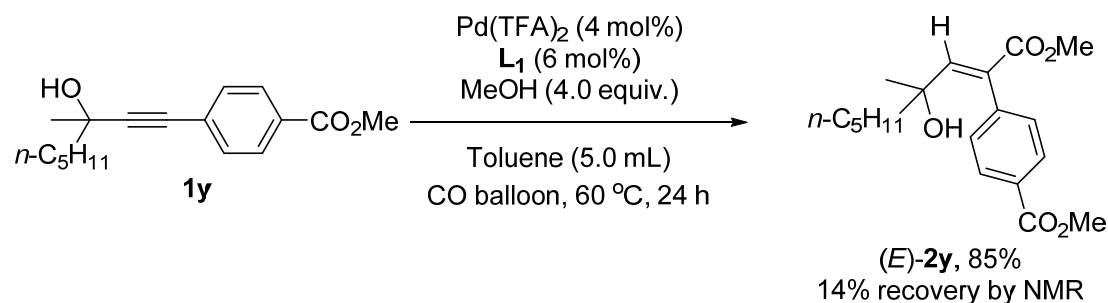

Following **Typical Procedure IV**, the reaction of Pd(TFA)<sub>2</sub> (13.6 mg, 0.04 mmol), **L**<sub>1</sub> (32.8 mg, 0.06 mmol), **1y** (274.4 mg, 1 mmol)/toluene (4.0 mL), and

MeOH (128.8 mg, 4 mmol)/toluene (1.0 mL) afforded (*E*)-**2y** (282.9 mg, 85%) as a yellow oil [eluent: petroleum ether/ethyl acetate = 25/1 (520 mL), 10/1 (550 mL)]: <sup>1</sup>H NMR (400 MHz, CDCl<sub>3</sub>): δ = 8.03 (d, *J* = 8.0 Hz, 2 H, Ar-H), 7.28 (d, *J* = 8.0 Hz, 2 H, Ar-H), 7.10 (s, 1 H, =CH), 3.92 (s, 3 H, CO<sub>2</sub>Me), 3.70 (s, 3 H, CO<sub>2</sub>Me), 1.59-1.44 (m, 2 H, CH<sub>2</sub>), 1.43-1.11 (m, 10 H, 3 x CH<sub>2</sub> and CH<sub>3</sub> and OH), 0.88 (t, *J* = 7.0 Hz, 3 H, CH<sub>3</sub>); <sup>13</sup>C NMR (100 MHz, CDCl<sub>3</sub>): δ = 167.4, 166.7, 150.2, 140.6, 130.8, 129.6, 129.4, 129.1, 74.2, 52.4, 52.1, 43.1, 32.0, 28.8, 23.6, 22.5, 14.0; MS (70 eV, EI) *m/z* (%): 303 (M<sup>+</sup>-OMe, 7.61), 231 (100); IR (neat): ν = 3509, 2953, 2932, 2860, 1717, 1607, 1435, 1273, 1239, 1108, 1018 cm<sup>-1</sup>; HRMS calcd for C<sub>19</sub>H<sub>26</sub>O<sub>5</sub> [M]<sup>+</sup>: 334.1780, found: 334.1778.

**(14) Preparation of methyl (*E*)-2-(4-methylphenyl)-4-hydroxy-4-methylnon-2-enoate ((*E*)-**2z-A**) (hcf-3-154)**

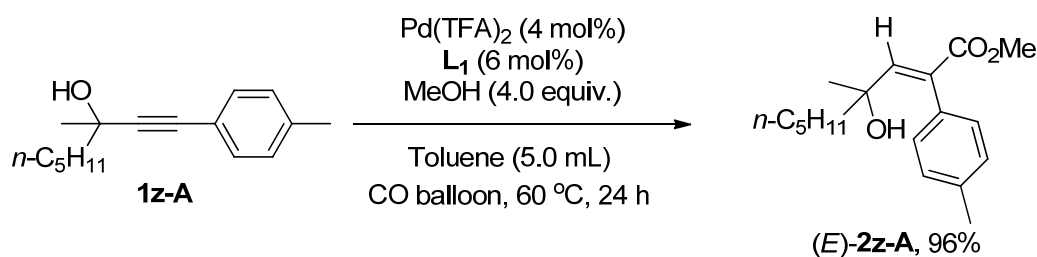

Following **Typical Procedure IV**, the reaction of Pd(TFA)<sub>2</sub> (13.6 mg, 0.04 mmol), **L**<sub>1</sub> (32.8 mg, 0.06 mmol), **1z-A** (230.5 mg, 1 mmol)/toluene (4.0 mL), and MeOH (129.1 mg, 4 mmol)/toluene (1.0 mL) afforded (*E*)-**2z-A** (278.9 mg, 96%) as a yellow oil [eluent: petroleum ether/ethyl acetate = 20/1 (420 mL), 10/1 (440 mL)]: <sup>1</sup>H NMR (400 MHz, CDCl<sub>3</sub>): δ = 7.18 (d, *J* = 7.6 Hz, 2 H, Ar-H), 7.09 (d, *J* = 7.6 Hz, 2 H, Ar-H), 7.06 (s, 1 H, =CH), 3.70 (s, 3 H, CO<sub>2</sub>Me), 2.36 (s, 3 H, CH<sub>3</sub>), 1.57-1.46 (m, 2 H, CH<sub>2</sub>), 1.46-1.40 (m, 1 H, OH), 1.40-1.17 (m, 9 H, 3 x CH<sub>2</sub> and CH<sub>3</sub>), 0.88 (t, *J* = 7.2 Hz, 3 H, CH<sub>3</sub>); <sup>13</sup>C NMR (100 MHz, CDCl<sub>3</sub>): δ = 168.1, 149.5, 137.7, 131.9, 131.3, 129.3, 128.9, 74.3, 52.3, 43.2, 32.1, 29.0, 23.6, 22.5, 21.2, 14.0; MS (70 eV, EI) *m/z* (%): 259 (M<sup>+</sup>-OMe, 4.72), 187 (100); IR (neat): ν = 3488, 2953, 2930, 2861, 1717, 1456, 1456, 1434, 1237, 1018 cm<sup>-1</sup>; HRMS calcd for C<sub>18</sub>H<sub>26</sub>O<sub>3</sub> [M]<sup>+</sup>: 290.1882, found: 290.1878.

**(15) Preparation of methyl (*E*)-2-(4-methoxyphenyl)-4-hydroxy-4-methylnon-2-enoate ((*E*)-**2z-B**) (hcf-3-156)**

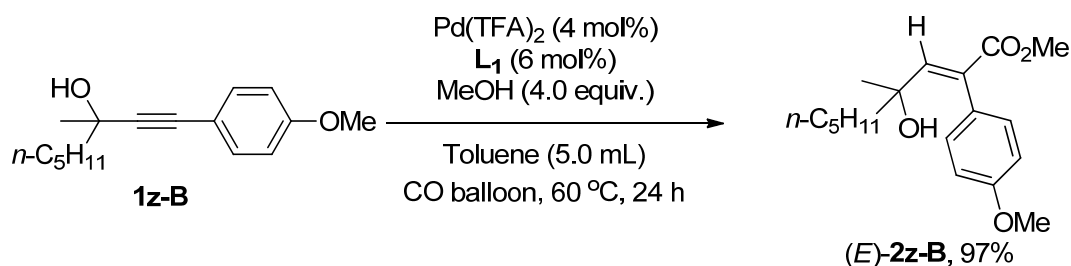

Following **Typical Procedure IV**, the reaction of  $\text{Pd(TFA)}_2$  (13.6 mg, 0.04 mmol),  $\text{L}_1$  (32.8 mg, 0.06 mmol), **1z-B** (246.3 mg, 1 mmol)/toluene (4.0 mL), and MeOH (129.3 mg, 4 mmol)/toluene (1.0 mL) afforded **(E)-2z-B** (296.8 mg, 97%) as a yellow oil [eluent: petroleum ether/ethyl acetate = 25/1 (525 mL), 10/1 (550 mL)]:  $^1\text{H NMR}$  (400 MHz,  $\text{CDCl}_3$ ):  $\delta$  = 7.13 (d,  $J$  = 8.8 Hz, 2 H, Ar-H), 7.06 (s, 1 H, =CH), 6.90 (d,  $J$  = 8.8 Hz, 2 H, Ar-H), 3.81 (s, 3 H,  $\text{OCH}_3$ ), 3.71 (s, 3 H,  $\text{CO}_2\text{Me}$ ), 1.58-1.42 (m, 3 H,  $\text{CH}_2$  and OH), 1.41-1.15 (m, 9 H, 3 x  $\text{CH}_2$  and  $\text{CH}_3$ ), 0.88 (t,  $J$  = 7.2 Hz, 3 H,  $\text{CH}_3$ );  $^{13}\text{C NMR}$  (100 MHz,  $\text{CDCl}_3$ ):  $\delta$  = 168.2, 159.2, 149.6, 131.0, 130.7, 126.7, 113.7, 74.3, 55.2, 52.3, 43.2, 32.1, 29.0, 23.6, 22.5, 14.0; **MS** (70 eV, EI)  $m/z$  (%): 306 ( $\text{M}^+$ , 4.39), 203 (100); **IR** (neat):  $\nu$  = 3499, 2953, 2932, 2861, 1715, 1608, 1512, 1460, 1435, 1241, 1174  $\text{cm}^{-1}$ ; **HRMS** calcd for  $\text{C}_{18}\text{H}_{26}\text{O}_4$  [ $\text{M}]^+$ : 306.1831, found: 306.1825.

**(16) Electronic effect investigation (hcf-3-158, hcf-3-159, hcf-3-160, hcf-3-163)**

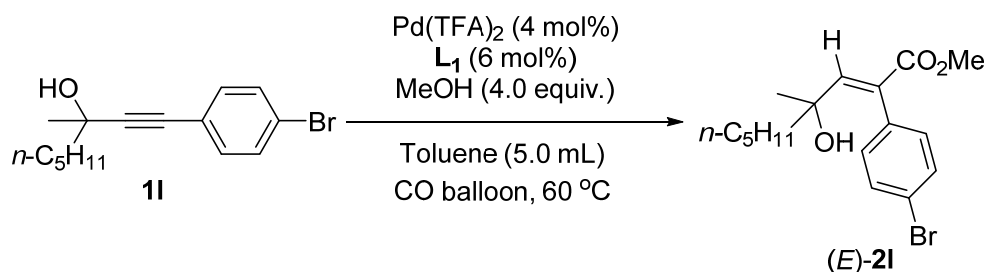

To a flame-dried Schlenk tube were added  $\text{Pd(TFA)}_2$  (13.6 mg, 0.04 mmol),  $\text{L}_1$  (32.8 mg, 0.06 mmol), **1I** (295.3 mg, 1 mmol)/toluene (2 mL), MeOH (129.4 mg, 4.0 mmol)/toluene (2 mL), and diphenylmethane (the internal standard, 83.6  $\mu\text{L}$ ,  $d = 1.006 \text{ g/mL}$ , 84.1 mg, 0.5 mmol)/toluene (1 mL) sequentially under argon. The resulting mixture was then frozen with a liquid nitrogen bath, degassed to remove the argon inside completely, and refilled with CO by a balloon of CO for three times. Then the resulting mixture was stirred at 60 °C with a balloon of CO and monitored at different time (see Table S8). The yields were determined by  $^1\text{H NMR}$  measurement



using diphenylmethane as the internal standard.

**Table S8.** For **11**:

| Time / h | Yield of ( <i>E</i> )- <b>21</b> |
|----------|----------------------------------|
| 2        | 35                               |
| 4        | 46                               |
| 6        | 60                               |
| 8        | 67                               |
| 10       | 74                               |
| 12       | 80                               |

  

Pd(TFA)<sub>2</sub> (4 mol%)  
L<sub>1</sub> (6 mol%)  
MeOH (4.0 equiv.)  
Toluene (5.0 mL)  
CO balloon, 60 °C

To a flame-dried Schlenk tube were added Pd(TFA)<sub>2</sub> (13.6 mg, 0.04 mmol), L<sub>1</sub> (32.8 mg, 0.06 mmol), **1y** (274.4 mg, 1 mmol)/toluene (2 mL), MeOH (128.9 mg, 4.0 mmol)/toluene (2 mL), and diphenylmethane (the internal standard, 83.6 μL, d = 1.006 g/mL, 84.1 mg, 0.5 mmol)/toluene (1 mL) sequentially under argon. The resulting mixture was then frozen with a liquid nitrogen bath, degassed to remove the argon inside completely, and refilled with CO by a balloon of CO for three times. Then the resulting mixture was stirred at 60 °C with a balloon of CO and monitored at different time (see Table S9). The yields were determined by <sup>1</sup>H NMR measurement using diphenylmethane as the internal standard.

**Table S9.** For **1y**:

| Time / h | Yield of ( <i>E</i> )- <b>2y</b> |
|----------|----------------------------------|
| 1        | 13                               |
| 2        | 18                               |
| 4        | 26                               |
| 6        | 41                               |
| 8        | 48                               |
| 10       | 57                               |
| 12       | 64                               |

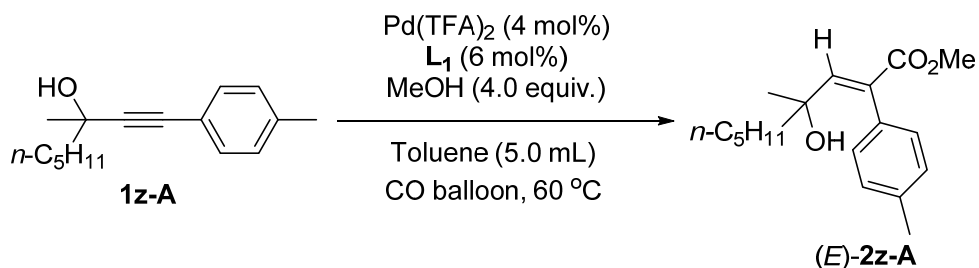

To a flame-dried Schlenk tube were added Pd(TFA)<sub>2</sub> (13.6 mg, 0.04 mmol), **L**<sub>1</sub> (32.8 mg, 0.06 mmol), **1z-A** (230.4 mg, 1 mmol)/toluene (2 mL), MeOH (129.1 mg, 4.0 mmol)/toluene (2 mL), and diphenylmethane (the internal standard, 83.6 μL, d = 1.006 g/mL, 84.1 mg, 0.5 mmol)/toluene (1 mL) sequentially under argon. The resulting mixture was then frozen with a liquid nitrogen bath, degassed to remove the argon inside completely, and refilled with CO by a balloon of CO for three times. Then the resulting mixture was stirred at 60 °C with a balloon of CO and monitored at different time (see Table S10). The yields were determined by <sup>1</sup>H NMR measurement using diphenylmethane as the internal standard.

**Table S10.** For **1z-A**:

| Time / h | Yield of <b>(E)-2z-A</b> |
|----------|--------------------------|
| 1        | 48                       |
| 2        | 63                       |
| 4        | 78                       |
| 6        | 86                       |
| 8        | 92                       |
| 10       | 95                       |

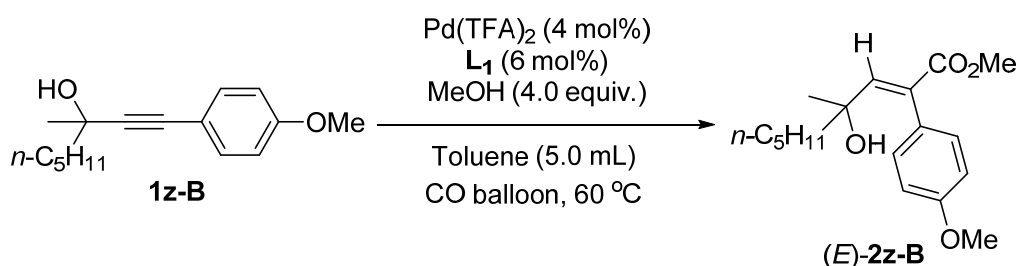

To a flame-dried Schlenk tube were added Pd(TFA)<sub>2</sub> (13.6 mg, 0.04 mmol), **L**<sub>1</sub> (32.8 mg, 0.06 mmol), **1z-B** (246.4 mg, 1 mmol)/toluene (2 mL), MeOH (128.9 mg, 4.0 mmol)/toluene (2 mL), and diphenylmethane (the internal standard, 83.6 μL, d = 1.006 g/mL, 84.1 mg, 0.5 mmol)/toluene (1 mL) sequentially under argon. The resulting mixture was then frozen with a liquid nitrogen bath, degassed to remove the

argon inside completely, and refilled with CO by a balloon of CO for three times. Then the resulting mixture was stirred at 60 °C with a balloon of CO and monitored at different time (see Table S11). The yields were determined by <sup>1</sup>H NMR measurement using diphenylmethane as the internal standard.

**Table S11.** For **1z-B**:

| Time / h | Yield of ( <i>E</i> )- <b>2z-B</b> |
|----------|------------------------------------|
| 0.5      | 56                                 |
| 1        | 64                                 |
| 2        | 75                                 |
| 4        | 90                                 |
| 6        | 95                                 |
| 8        | 98                                 |

Combing the above data, a linear relationship was obtained for  $\ln \{c_0/(c_0-[(E)\text{-}2\mathbf{k}\text{-R}])\}$  vs. reaction time, indicating that the electronic effect has a significant effect on the rate-determining step (Figure S7).

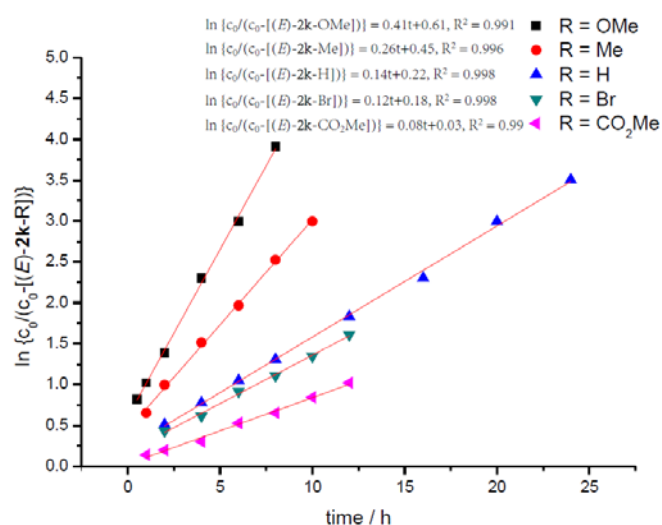

**Figure S7.**  $\ln \{c_0/(c_0-[(E)\text{-}2\mathbf{k}\text{-R}])\}$  vs. time (R-square is the coefficient of determination)

**(17) Preparation of 4-methoxycarbonylphenyl (*E*)-4-hydroxy-4-methyl-2-phenyl-non-2-enoate ((*E*)-2ke) (hcf-3-31)**

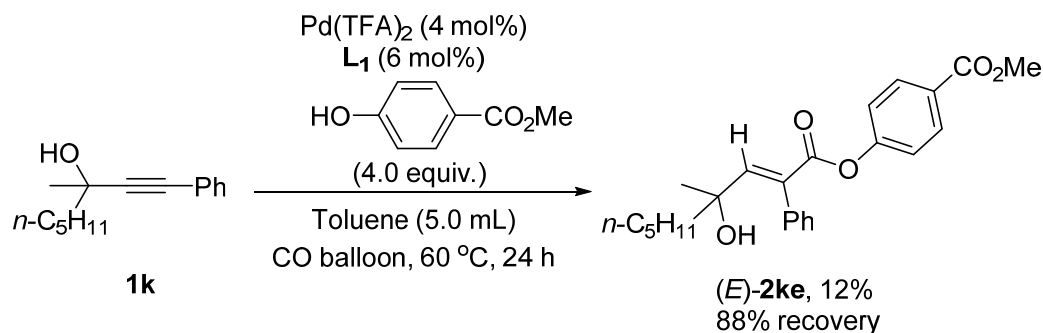

Following **Typical procedure IV**, the reaction of Pd(TFA)<sub>2</sub> (13.6 mg, 0.04 mmol), **L**<sub>1</sub> (32.8 mg, 0.06 mmol), **1k** (216.3 mg, 1 mmol)/toluene (4 mL), and 4-methoxycarbonylphenol (608.9 mg, 4 mmol)/toluene (1 mL) afforded (*E*)-**2ke** (46.7 mg, 12%) (88% of **1k** remained based on <sup>1</sup>H NMR analysis of the crude product) as a yellow oil [eluent: petroleum ether/ethyl acetate = 50/1 (~200 mL), 20/1 (630 mL), 10/1 (550 mL), 5/1 (240 mL)]: **<sup>1</sup>H NMR** (400 MHz, CDCl<sub>3</sub>): δ = 8.04 (d, *J* = 8.4 Hz, 2 H, Ar-H), 7.46-7.27 (m, 6 H, Ar-H and =CH), 7.16 (d, *J* = 8.8 Hz, 2 H, Ar-H), 3.89 (s, 3 H, CO<sub>2</sub>Me), 1.61-1.50 (m, 2 H, CH<sub>2</sub>), 1.50-1.18 (m, 10 H, 3 x CH<sub>2</sub> and CH<sub>3</sub> and OH), 0.90 (t, *J* = 7.0 Hz, 3 H, CH<sub>3</sub>); **<sup>13</sup>C NMR** (100 MHz, CDCl<sub>3</sub>): δ = 166.3, 165.4, 154.6, 151.9, 134.4, 131.0, 130.8, 129.5, 128.3, 128.2, 127.6, 121.5, 74.4, 52.1, 43.1, 32.1, 28.9, 23.6, 22.5, 14.0; **MS** (ESI) *m/z*: 419 (M+Na)<sup>+</sup>, 414 (M+NH<sub>4</sub>)<sup>+</sup>, 379 (M-OH)<sup>+</sup>; **IR** (neat): ν = 3516, 2959, 2940, 2862, 1717, 1436, 1278, 1186, 1160 cm<sup>-1</sup>; **HRMS** calcd for C<sub>24</sub>H<sub>28</sub>O<sub>5</sub>Na [M+Na]<sup>+</sup>: 419.1829, found: 419.1820.

**(18) Preparation of *p*-tolyl (*E*)-4-hydroxy-4-methyl-2-phenylnon-2-enoate ((*E*)-**2kf**) (hcf-3-101, hcf-3-38)**

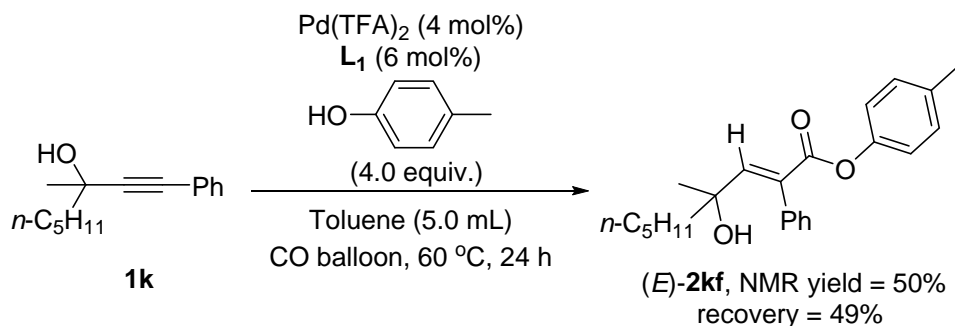

**Typical Procedure V:** To a flame-dried Schlenk tube were added Pd(TFA)<sub>2</sub> (13.6 mg, 0.04 mmol), **L**<sub>1</sub> (32.8 mg, 0.06 mmol), **1k** (216.3 mg, 1 mmol)/toluene (4 mL), and *p*-cresol (432.8 mg, 4.0 mmol)/toluene (1 mL) sequentially under argon. The resulting

mixture was then frozen with a liquid nitrogen bath, degassed to remove the argon inside completely, and refilled with CO by a balloon of CO for three times. Then the resulting mixture was stirred at 60 °C with a balloon of CO for 24 h. After that, the resulting mixture was diluted with 3 mL of ethyl acetate, filtered through a short column of silica gel (3 cm) eluted with ethyl acetate (20 x 2 mL), and concentrated. The crude product was purified by column chromatography on silica gel to afford impure mixture (410.7 mg) [eluent: petroleum ether/ethyl acetate = 50/1 (~200 mL), 20/1 (1050 mL), 10/1 (440 mL)] as a solid containing (*E*)-**2kf** (162.1 mg, 0.46 mmol, 46%) and *p*-cresol (248.6 mg, 2.30 mmol) since the R<sub>f</sub> values of *p*-cresol and product are almost the same [50% of (*E*)-**2kf** and 49% of **1k** were detected based on <sup>1</sup>H NMR analysis of the crude product]. The pure sample of (*E*)-**2kf** was prepared as a yellow oil by preparative thin layer chromatography (TLC, 20 x 20 cm<sup>2</sup>) eluted with petroleum ether/ethyl acetate = 3/1: <sup>1</sup>H NMR (400 MHz, CDCl<sub>3</sub>): δ = 7.48-7.28 (m, 5 H, Ar-H), 7.25 (s, 1 H, =CH), 7.13 (d, *J* = 8.0 Hz, 2 H, Ar-H), 6.94 (d, *J* = 8.4 Hz, 2 H, Ar-H), 2.31 (s, 3 H, CH<sub>3</sub>), 1.64-1.49 (m, 2 H, CH<sub>2</sub>), 1.49-1.19 (m, 10 H, 3 x CH<sub>2</sub> and CH<sub>3</sub> and OH), 0.89 (t, *J* = 7.2 Hz, 3 H, CH<sub>3</sub>); <sup>13</sup>C NMR (100 MHz, CDCl<sub>3</sub>): δ = 166.2, 151.0, 148.7, 135.3, 134.8, 131.2, 129.8, 129.6, 128.2, 128.0, 121.1, 74.4, 43.1, 32.1, 29.0, 23.6, 22.5, 20.8, 14.0; MS (EI 70 ev) *m/z* (%): 352 (M<sup>+</sup>, 1.16), 43 (100); IR (neat): ν = 3502, 2956, 2931, 2861, 1731, 1507, 1213, 1192, 1167 cm<sup>-1</sup>; HRMS calcd for C<sub>23</sub>H<sub>28</sub>O<sub>3</sub> [M]<sup>+</sup>: 352.2038, found: 352.2042.

**(19) Preparation of 4-methoxyphenyl (*E*)-4-hydroxy-4-methyl-2-phenylnon-2-enoate ((*E*)-**2kg**) (hcf-3-102, hcf-3-52)**

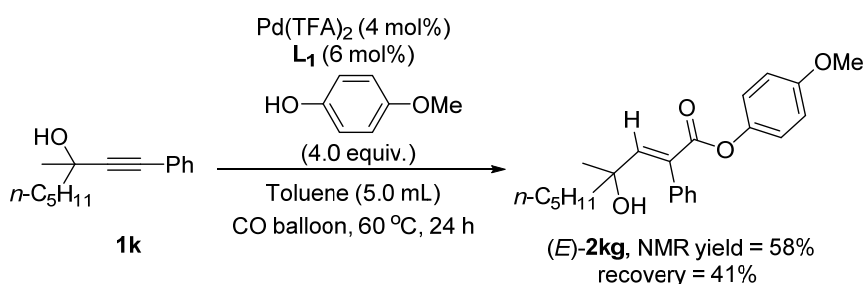

Following **Typical procedure V**, the reaction of Pd(TFA)<sub>2</sub> (13.6 mg, 0.04 mmol), **L**<sub>1</sub> (32.8 mg, 0.06 mmol), **1k** (216.3 mg, 1 mmol)/toluene (3 mL), and 4-methoxyphenol (496.9 mg, 4 mmol)/toluene (2 mL) afforded a solid (574.5 mg)

[eluent: petroleum ether/ethyl acetate = 50/1 (~200 mL), 20/1 (1050 mL), 10/1 (440 mL)] containing (*E*)-**2kg** (206.2 mg, 0.56 mmol, 56%) and 4-methoxyphenol (368.3mg, 2.97 mmol) since the R<sub>f</sub> values of 4-methoxyphenol and product are almost the same [58% of (*E*)-**2kg** and 41% of **1k** were detected based on <sup>1</sup>H NMR analysis of the crude product]. The pure sample of (*E*)-**2kg** was prepared as a yellow oil by preparative thin layer chromatography (TLC, 20 x 20 cm<sup>2</sup>) eluted with petroleum ether/ethyl acetate = 3/1: <sup>1</sup>H NMR (400 MHz, CDCl<sub>3</sub>): δ = 7.51-7.28 (m, 5 H, Ar-H), 7.25 (s, 1 H, =CH), 6.98 (d, *J* = 8.8 Hz, 2 H, Ar-H), 6.84 (d, *J* = 8.8 Hz, 2 H, Ar-H), 3.76 (s, 3 H, OMe), 1.66-1.49 (m, 2 H, CH<sub>2</sub>), 1.49-1.19 (m, 10 H, 3 x CH<sub>2</sub> and CH<sub>3</sub> and OH), 0.89 (t, *J* = 7.0 Hz, 3 H, CH<sub>3</sub>); <sup>13</sup>C NMR (100 MHz, CDCl<sub>3</sub>): δ = 166.3, 157.1, 151.0, 144.5, 134.8, 131.2, 129.5, 128.2, 128.0, 122.2, 114.3, 74.4, 55.5, 43.1, 32.1, 28.9, 23.6, 22.5, 14.0; MS (EI 70 ev) *m/z* (%): 368 (M<sup>+</sup>, 6.06), 43 (100); IR (neat): ν = 3487, 2948, 2937, 2869, 2844, 1724, 1509, 1238, 1194, 1172, 1158 cm<sup>-1</sup>; HRMS calcd for C<sub>23</sub>H<sub>28</sub>O<sub>4</sub> [M]<sup>+</sup>: 368.1988, found: 368.1993.

**(20) Preparation of 4-chlorophenyl (*E*)-4-hydroxy-4-methyl-2-phenylnon-2-enoate ((*E*)-**2kh**) (hcf-3-103, hcf-3-53)**

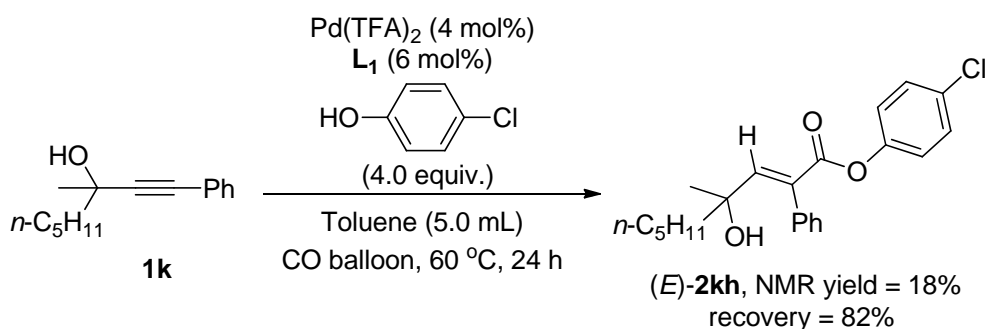

Following **Typical procedure V**, the reaction of Pd(TFA)<sub>2</sub> (13.6 mg, 0.04 mmol), L<sub>1</sub> (32.8 mg, 0.06 mmol), **1k** (216.4 mg, 1 mmol)/toluene (3 mL), and 4-chlorophenol (514.5 mg, 4 mmol)/toluene (2 mL) afforded a solid (189.3 mg) [eluent: petroleum ether/ethyl acetate = 50/1 (~200 mL), 20/1 (1050 mL), 10/1 (440 mL)] containing (*E*)-**2kh** (63.4 mg, 0.17 mmol, 17%) and 4-chlorophenol (125.9mg, 0.98 mmol) since the R<sub>f</sub> values of 4-chlorophenol and product are almost the same [18% of (*E*)-**2kh** and 82% of **1k** were detected based on <sup>1</sup>H NMR analysis of the crude product]. The pure sample of (*E*)-**2kh** was prepared as a yellow oil by preparative thin layer

chromatography (TLC, 20 x 20 cm<sup>2</sup>) eluted with petroleum ether/ethyl acetate = 3/1: **<sup>1</sup>H NMR** (400 MHz, CDCl<sub>3</sub>): δ = 7.47-7.22 (m, 8 H, Ar-H and =CH), 7.02 (d, *J* = 8.8 Hz, 2 H, Ar-H), 1.64-1.49 (m, 2 H, CH<sub>2</sub>), 1.49-1.19 (m, 10 H, 3 x CH<sub>2</sub> and CH<sub>3</sub> and OH), 0.89 (t, *J* = 7.2 Hz, 3 H, CH<sub>3</sub>); **<sup>13</sup>C NMR** (100 MHz, CDCl<sub>3</sub>): δ = 165.7, 151.7, 149.4, 134.5, 131.1, 130.9, 129.5, 129.3, 128.3, 128.2, 122.9, 74.4, 43.1, 32.1, 28.9, 23.6, 22.5, 14.0; **MS** (ESI) *m/z*: 397 (M(<sup>37</sup>Cl)+Na)<sup>+</sup>, 395 (M(<sup>35</sup>Cl)+Na)<sup>+</sup>, 357 (M(<sup>37</sup>Cl)-OH)<sup>+</sup>, 355 (M(<sup>35</sup>Cl)-OH)<sup>+</sup>; **IR** (neat): ν = 3437, 2958, 2931, 2871, 1732, 1486, 1196, 1164, 1090, 1014 cm<sup>-1</sup>; **HRMS** calcd for C<sub>22</sub>H<sub>25</sub><sup>35</sup>ClO<sub>3</sub>Na [M+Na]<sup>+</sup>: 395.1384, found: 395.1377.

The negative value for ρ points out the reaction favors phenols with electron-donating groups (Table 12, Figure S8).

**Table 12.** Hammett study with phenols bearing various substituents

| entry | R                  | Yield/% |
|-------|--------------------|---------|
| 1     | H                  | 11      |
| 2     | MeO <sub>2</sub> C | 3.5     |
| 3     | Me                 | 14      |
| 4     | MeO                | 16      |
| 5     | Cl                 | 6       |

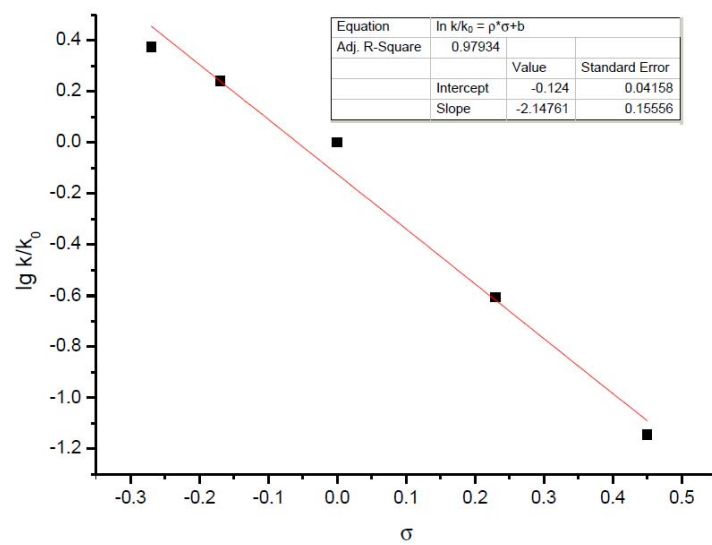

**Figure S8.** Hammett equation of phenols with varying acidity



### References:

1. W. Zhang, C. Huang, Y. Yuan, S. Ma, *Chem. Commun.* **2017**, 53, 12430.
2. Xu, D.; Li, Z.; Ma, S. *Tetrahedron Lett.* **2003**, 44, 6343.
3. Kim N.; Widenhoefer, R. A. *Angew. Chem., Int. Ed.* **2018**, 57, 4722.
4. Dai, J.; Duan, X.; Zhou, J.; Fu, C.; Ma, S. *Chin. J. Chem.* **2018**, 36, 387.
5. Eleya, N.; Mahal, A.; Hein, M.; Villinger, A.; Langer, P. *Adv. Synth. Catal.* **2011**, 353, 2761.
6. Tang, X.; Huang, X.; Cao, T.; Han, Y.; Jiang, X.; Lin, W.; Tang, Y.; Zhang, J.; Yu, Q.; Fu, C.; Ma, S. *Org. Chem. Front.* **2015**, 2, 688.
7. Rajaram, S.; Ramulu, U.; Aravind, S. Babu, K. S. *Helv. Chim. Acta.* **2015**, 98, 650.
8. Grée, D.; Vallerie, L.; Grée, R. *J. Org. Chem.* **2001**, 66, 2374.

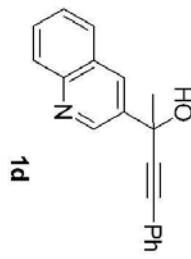

hcf-1-185-H  
 Sep 1 2017  
 SOLVENT: cdcl3  
 NA = 8  
 F1 = 399.749542 MHz  
 F2 = 100.526031 MHz

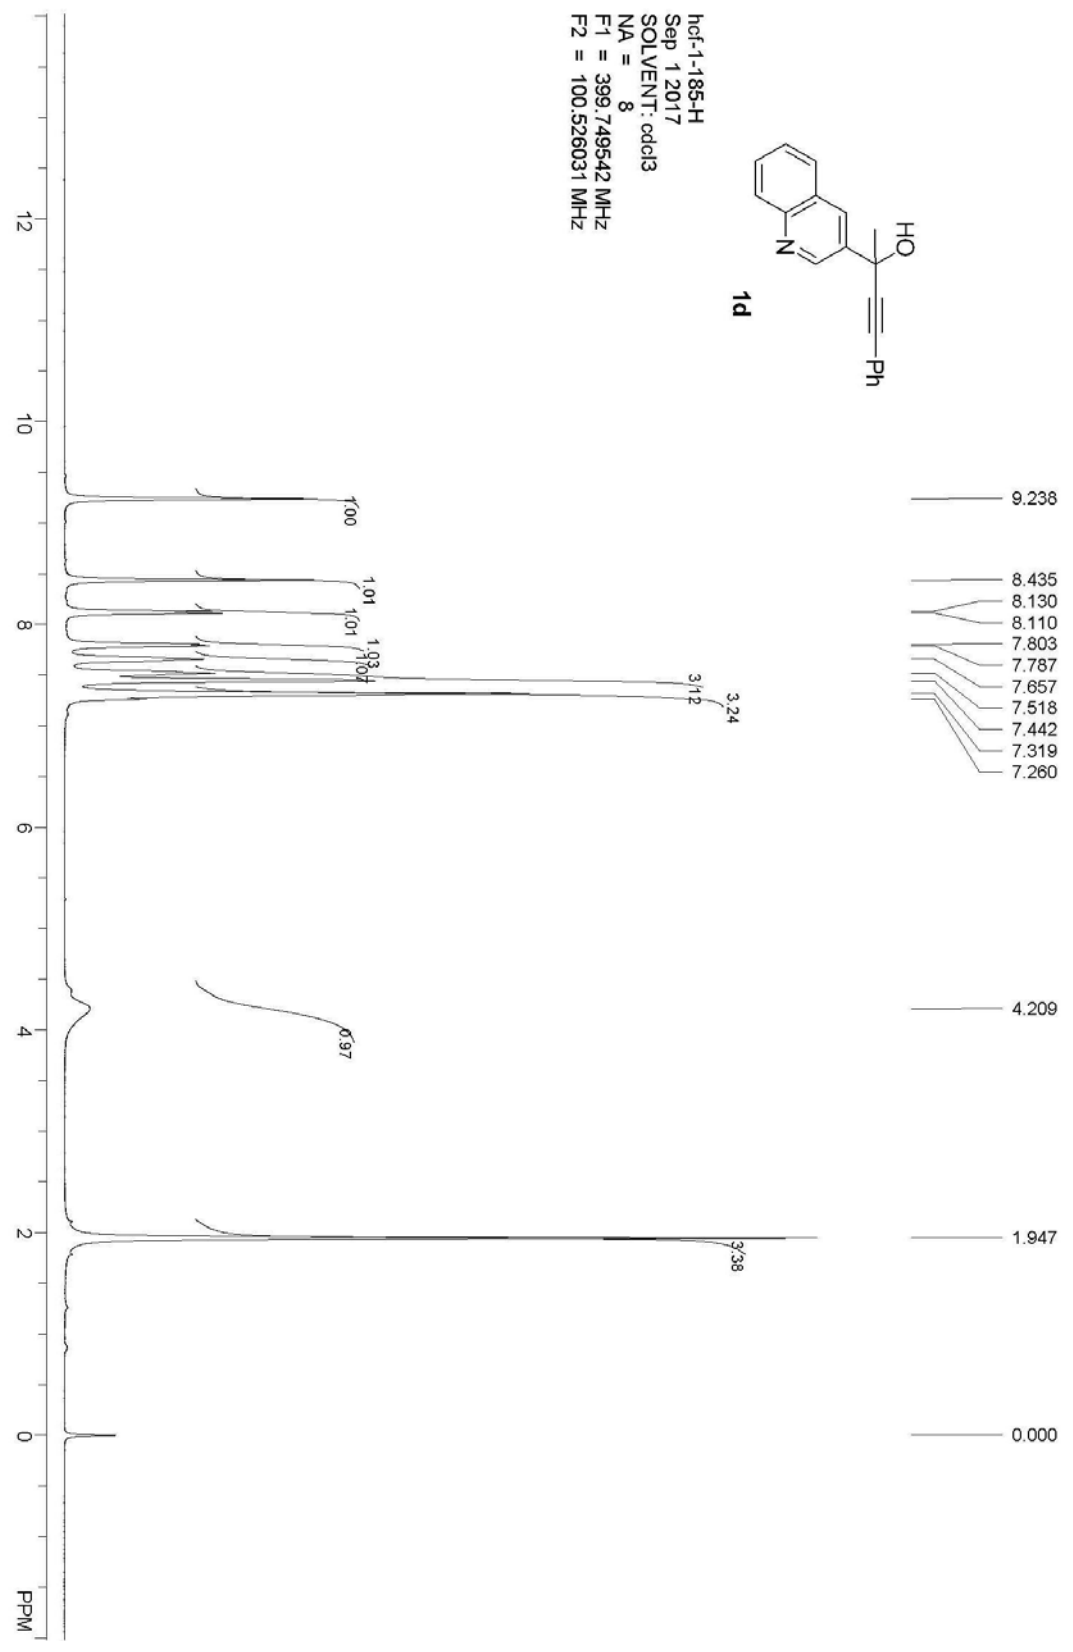

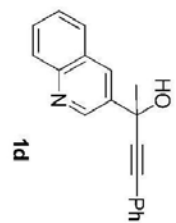

hcf-1-185-C  
Sep 9 2017  
SOLVENT: CDCl3  
NA = 512  
F1 = 100.615791 MHz  
F2 = 1.000000 MHz

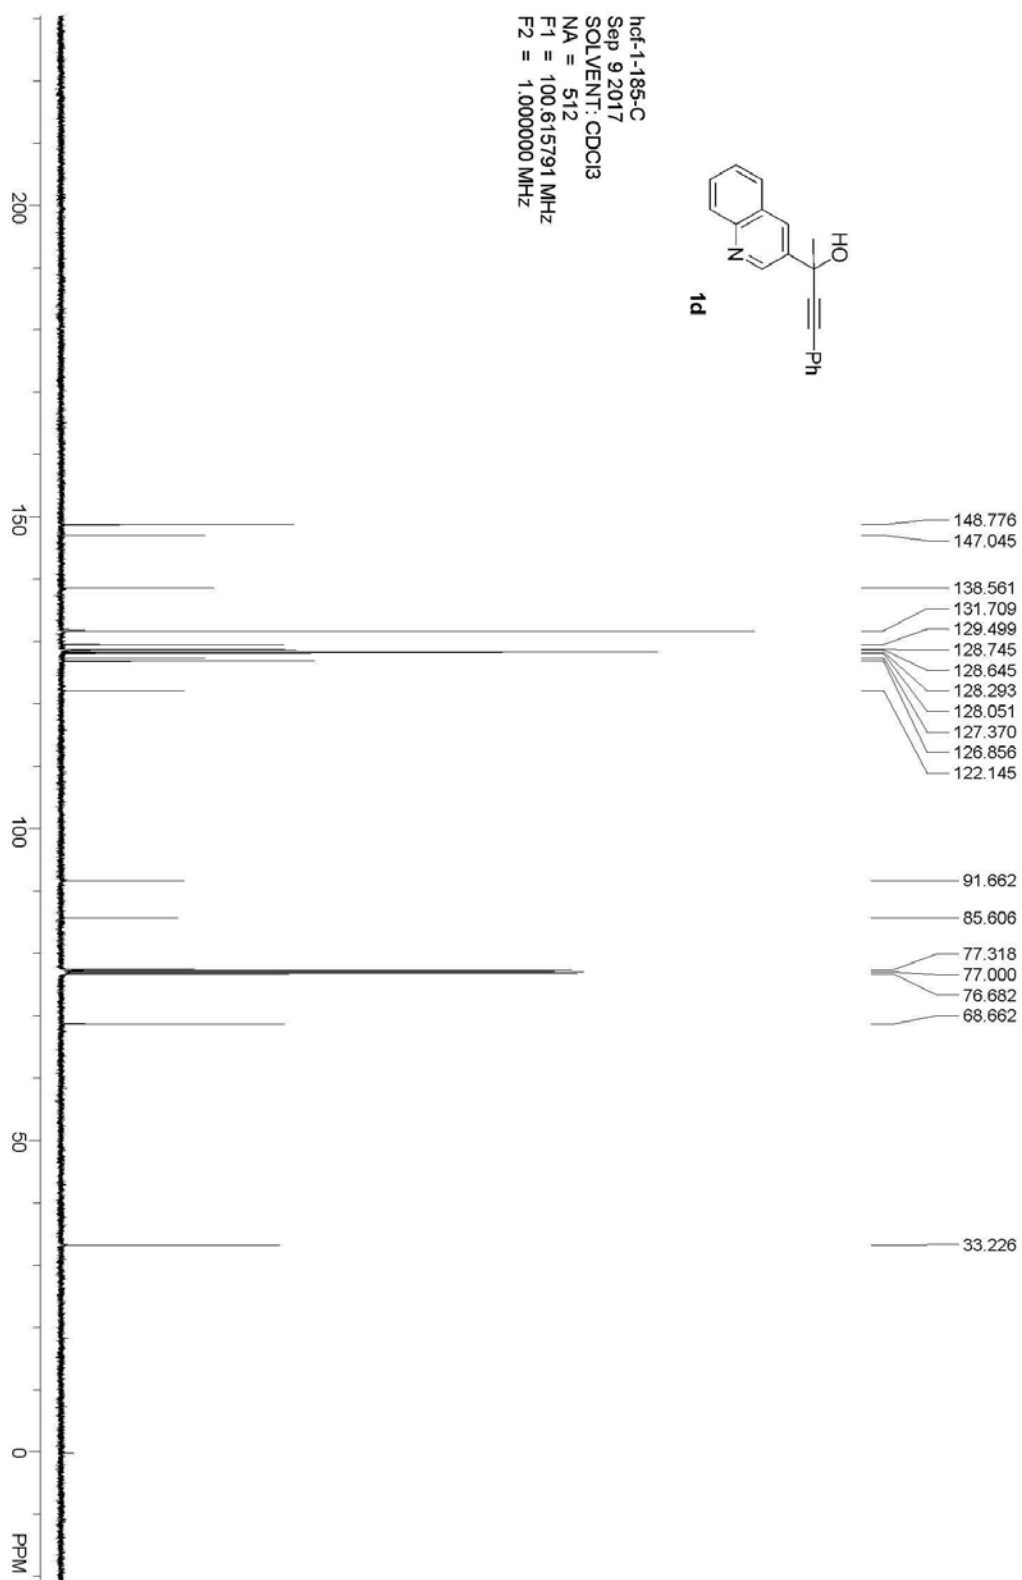

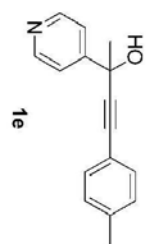

hcf-1-146-H  
 Mar 16 2017  
 SOLVENT: cdcl3  
 NA = 8  
 F1 = 399.749542 MHz  
 F2 = 100.526031 MHz

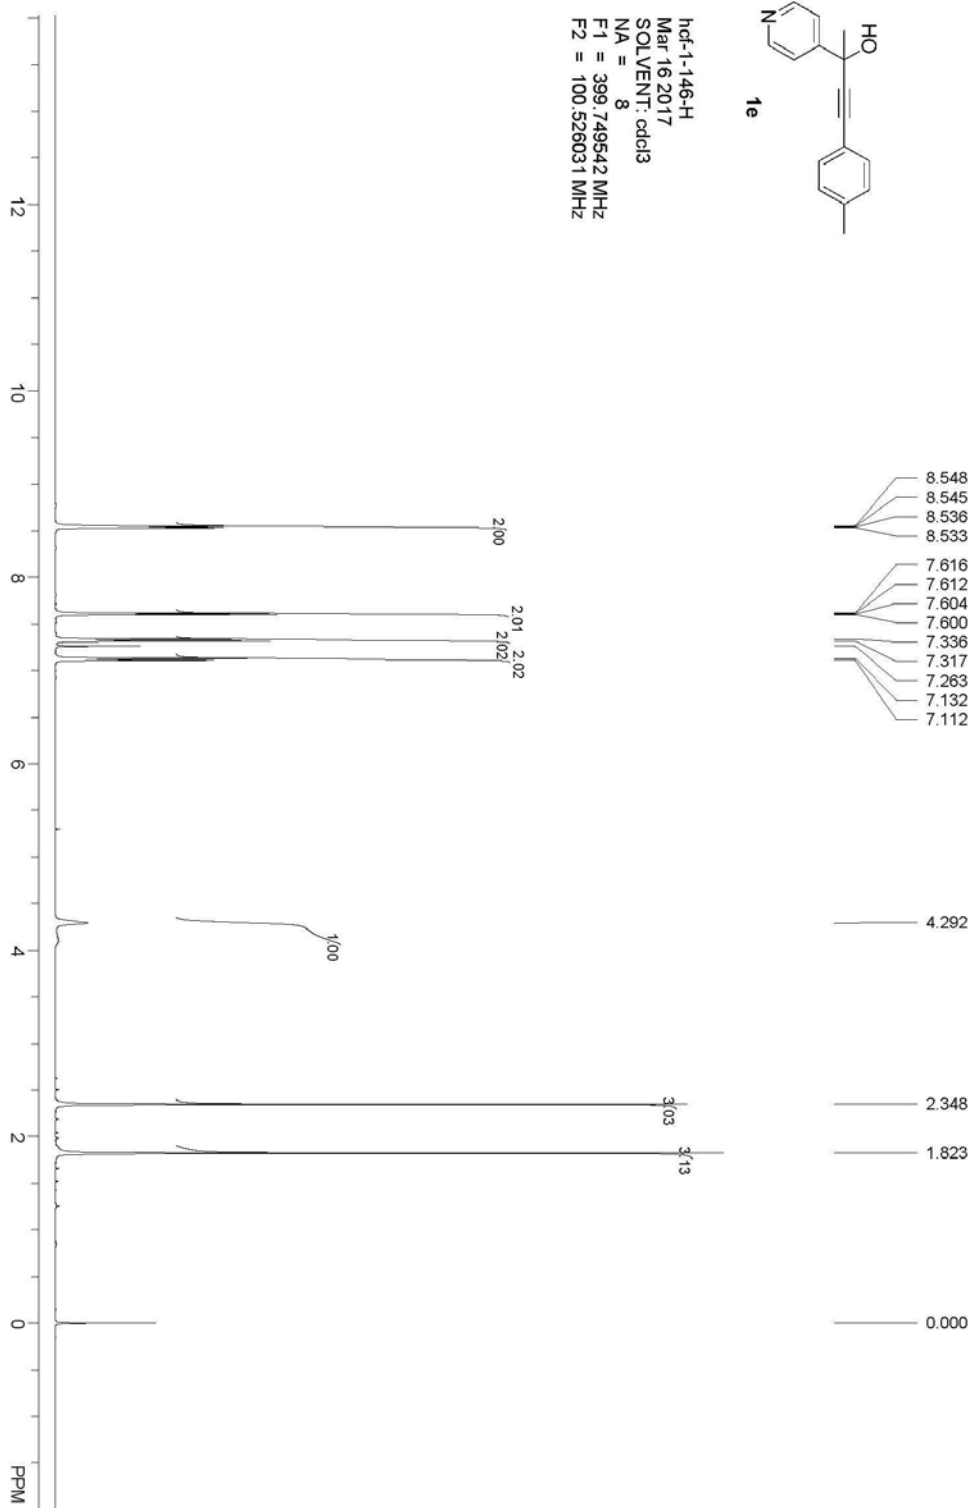

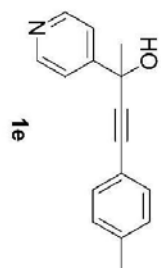

hcf-1-146-C  
 Mar 16 2017  
 SOLVENT: cdcl3  
 NA = 1000  
 F1 = 100.527557 MHz  
 F2 = 399.749146 MHz

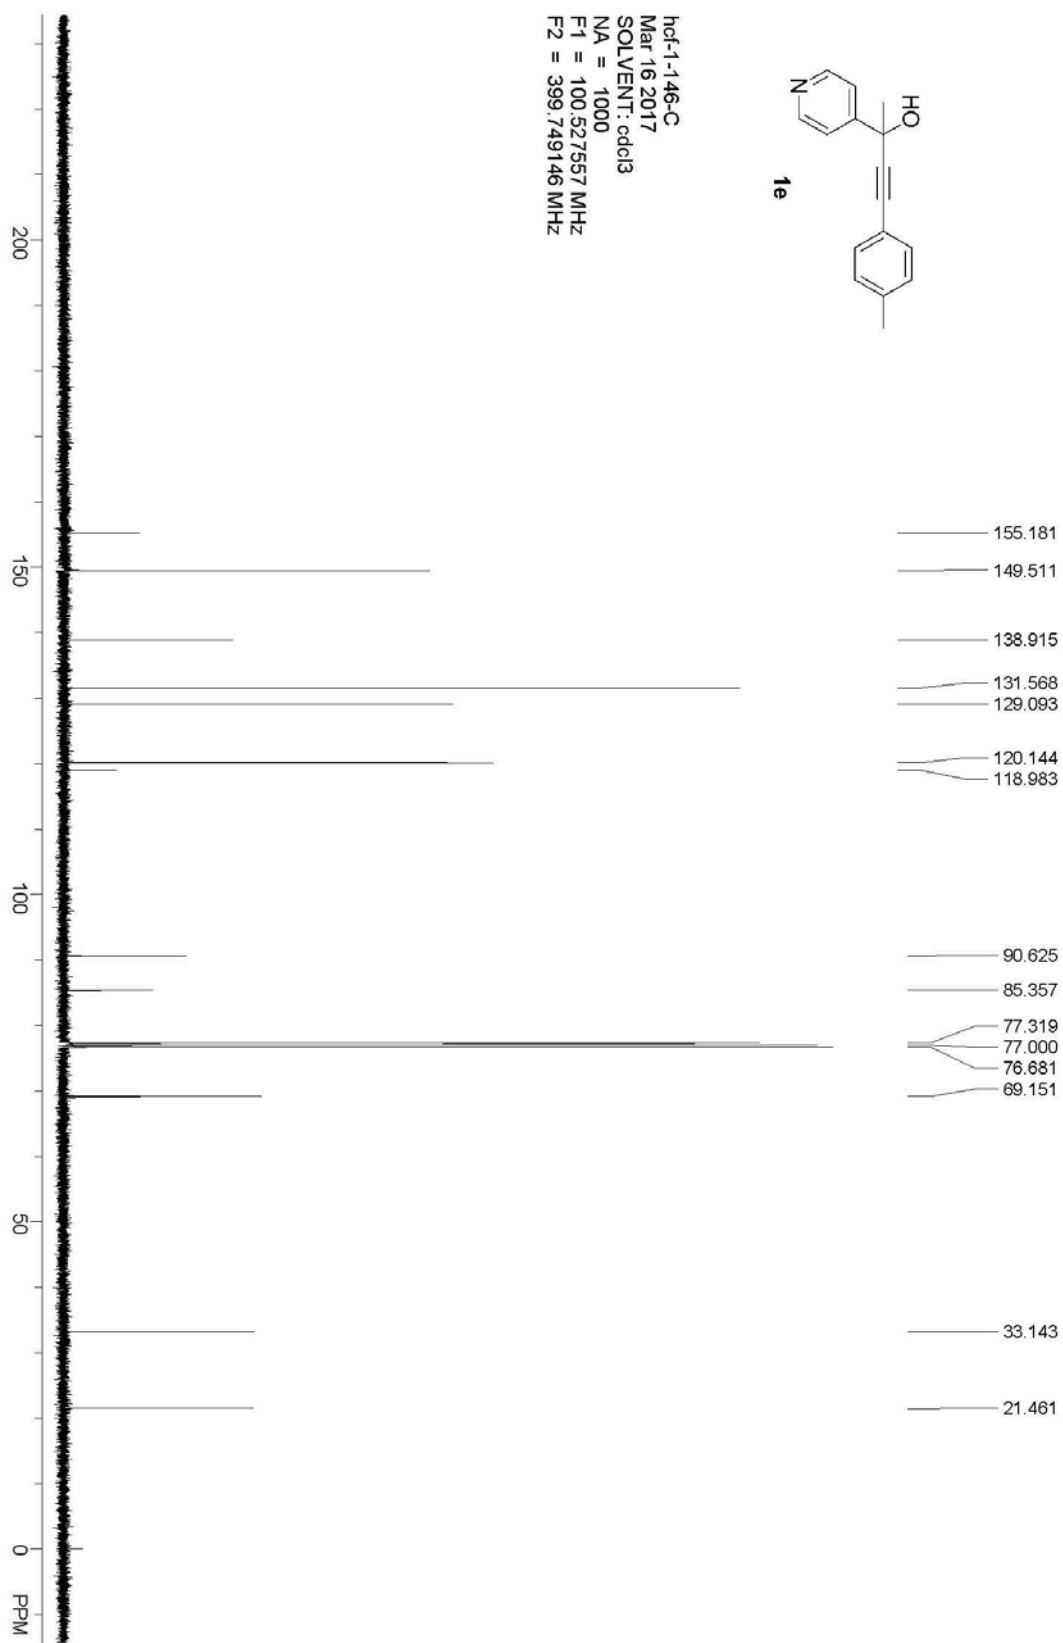

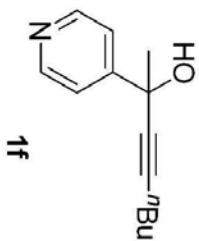

hcf-1-147-H  
 Mar 22 2017  
 SOLVENT: cdd13  
 NA = 8  
 F1 = 399.749542 MHz  
 F2 = 100.526031 MHz

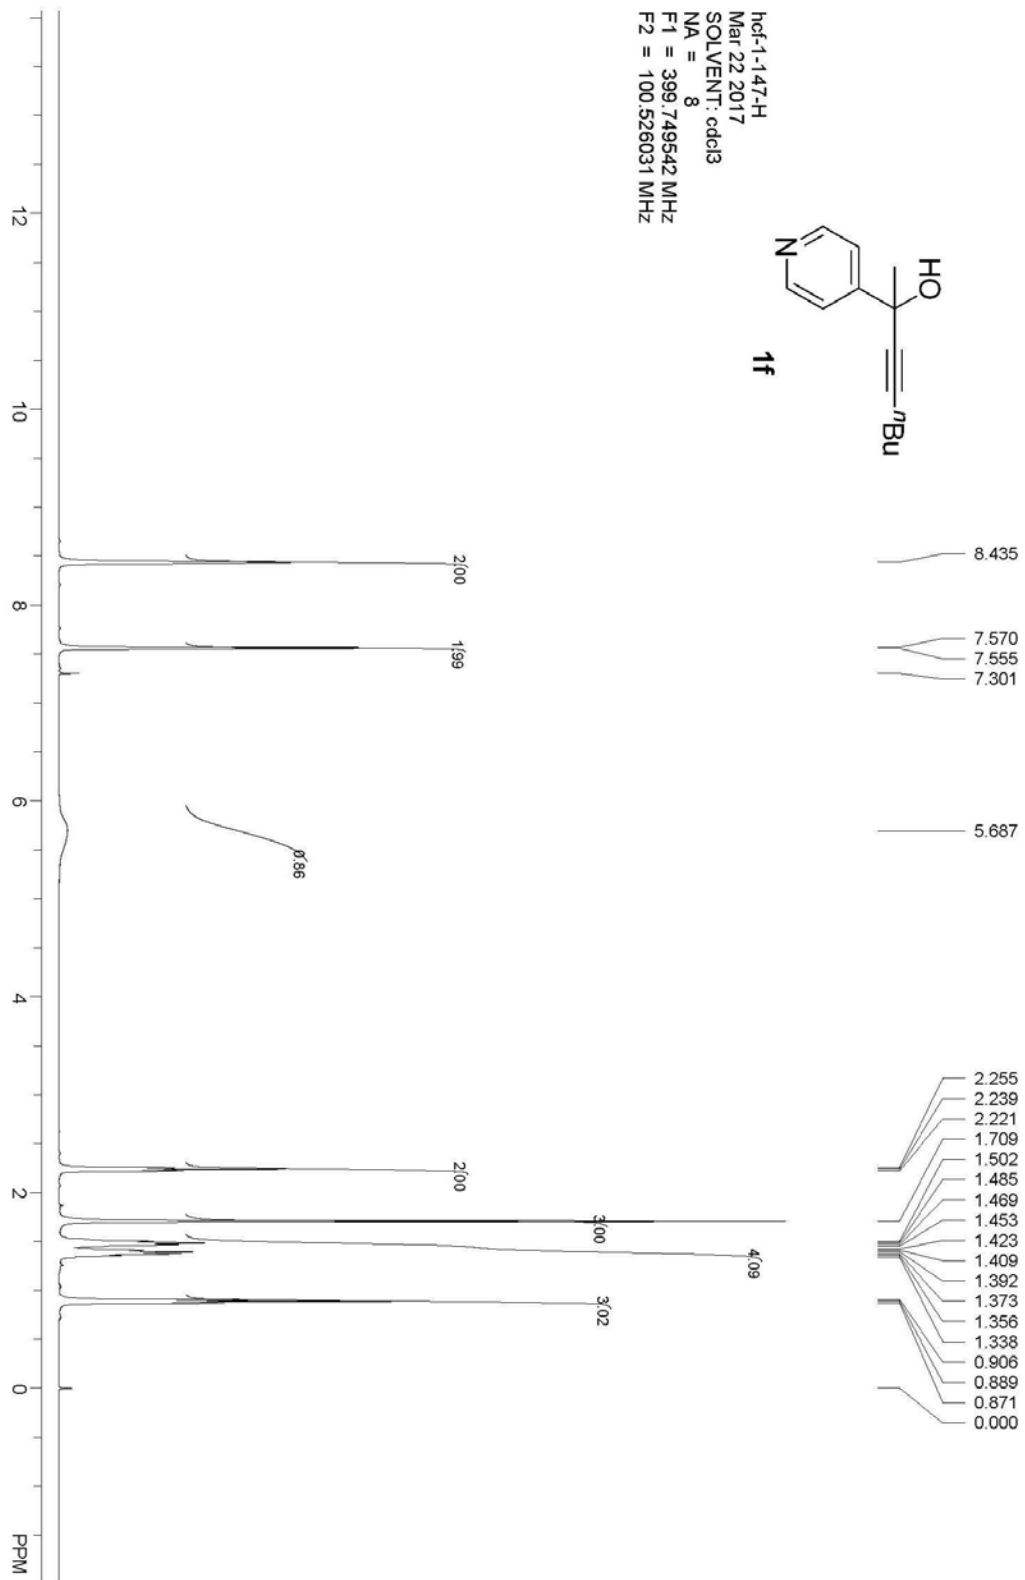

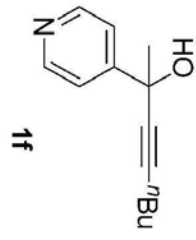

hcf-1-147-C  
May 23 2017  
SOLVENT: cdcl3  
NA = 1000  
F1 = 100.527567 MHz  
F2 = 399.749146 MHz

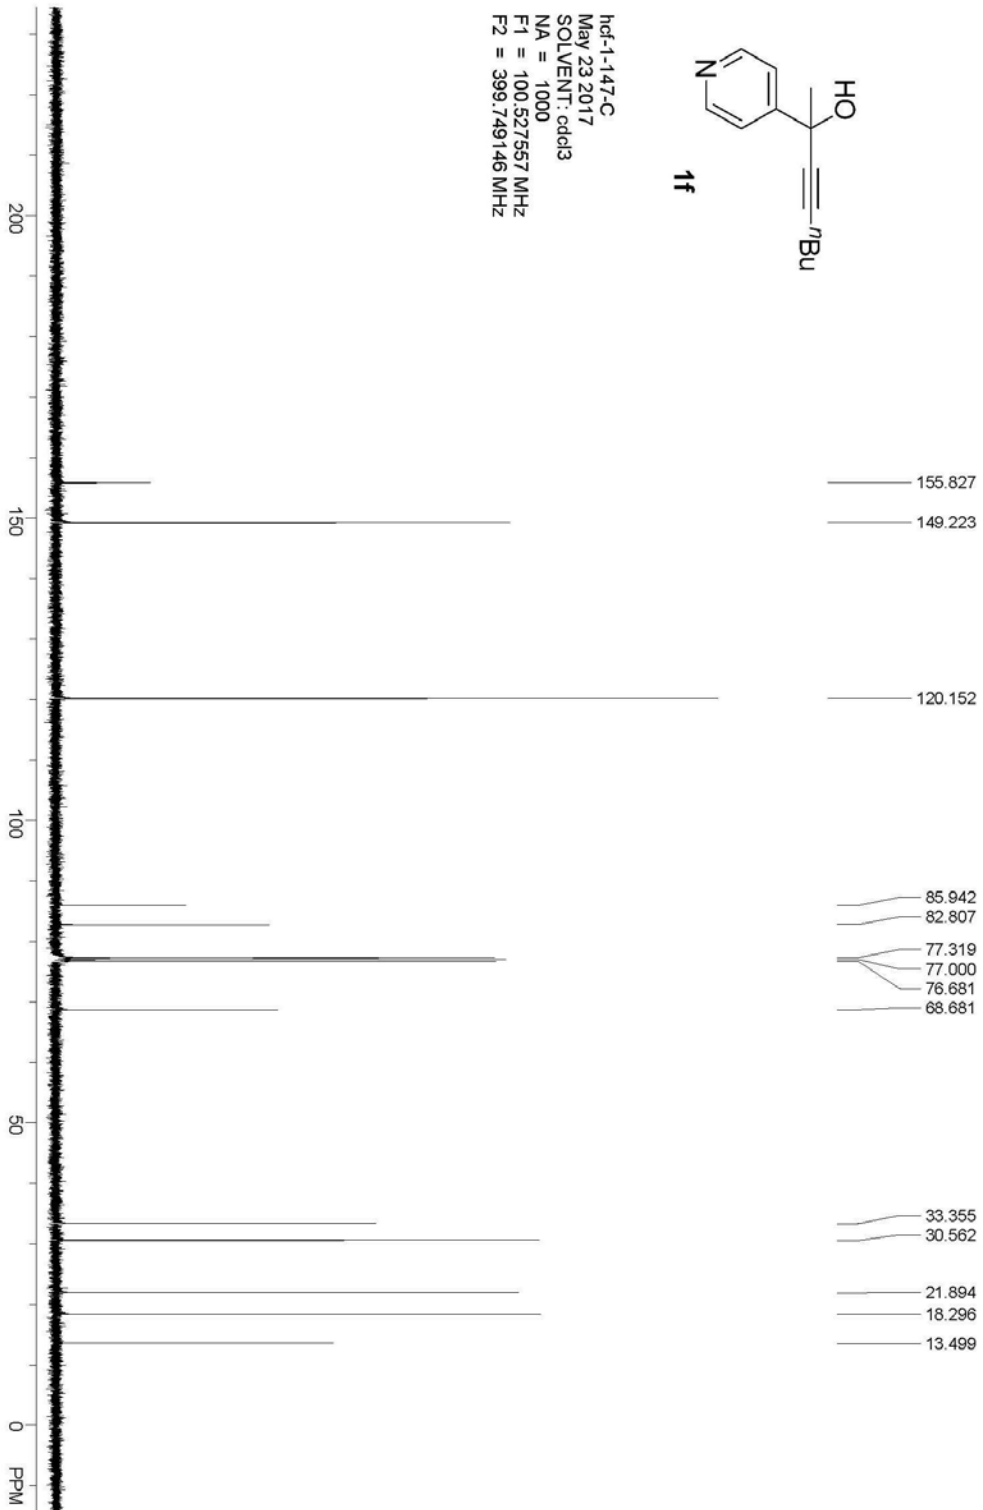

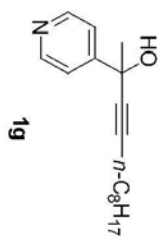

hcf-2-11-H  
 Nov 4 2017  
 SOLVENT: cdcl3  
 NA = 4  
 F1 = 399.749542 MHz  
 F2 = 100.526031 MHz

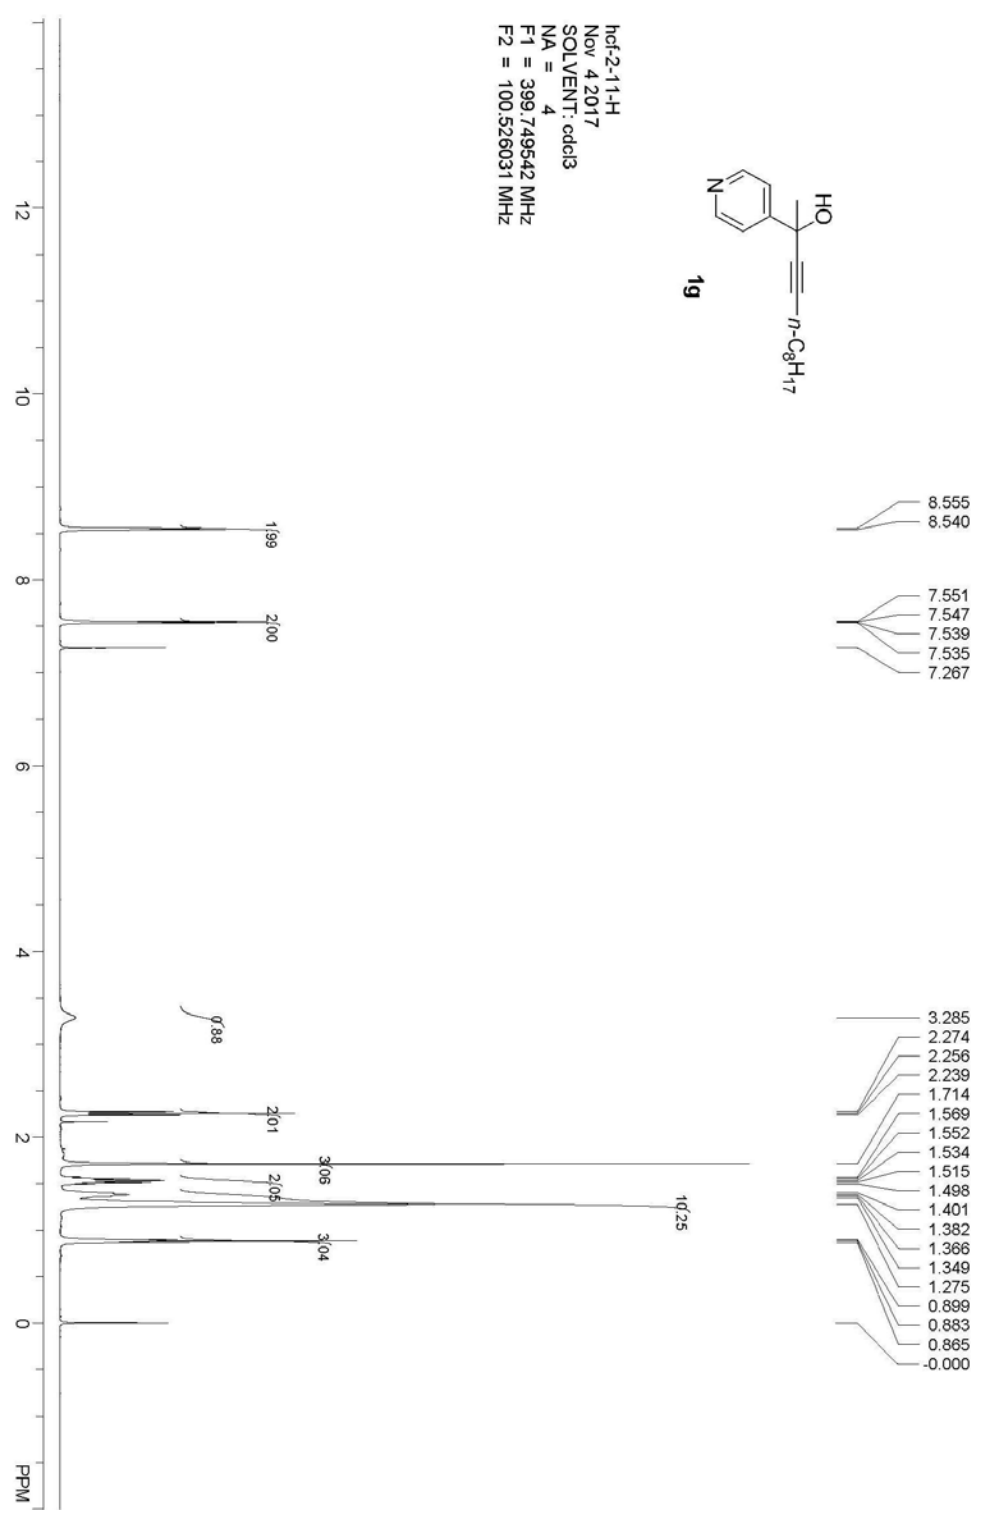



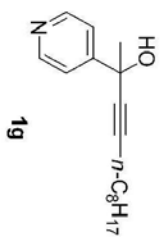

hcf-2-11-C  
 Oct 1 2017  
 SOLVENT: CDCl3  
 NA = 512  
 F1 = 100.615791 MHz  
 F2 = 1.000000 MHz

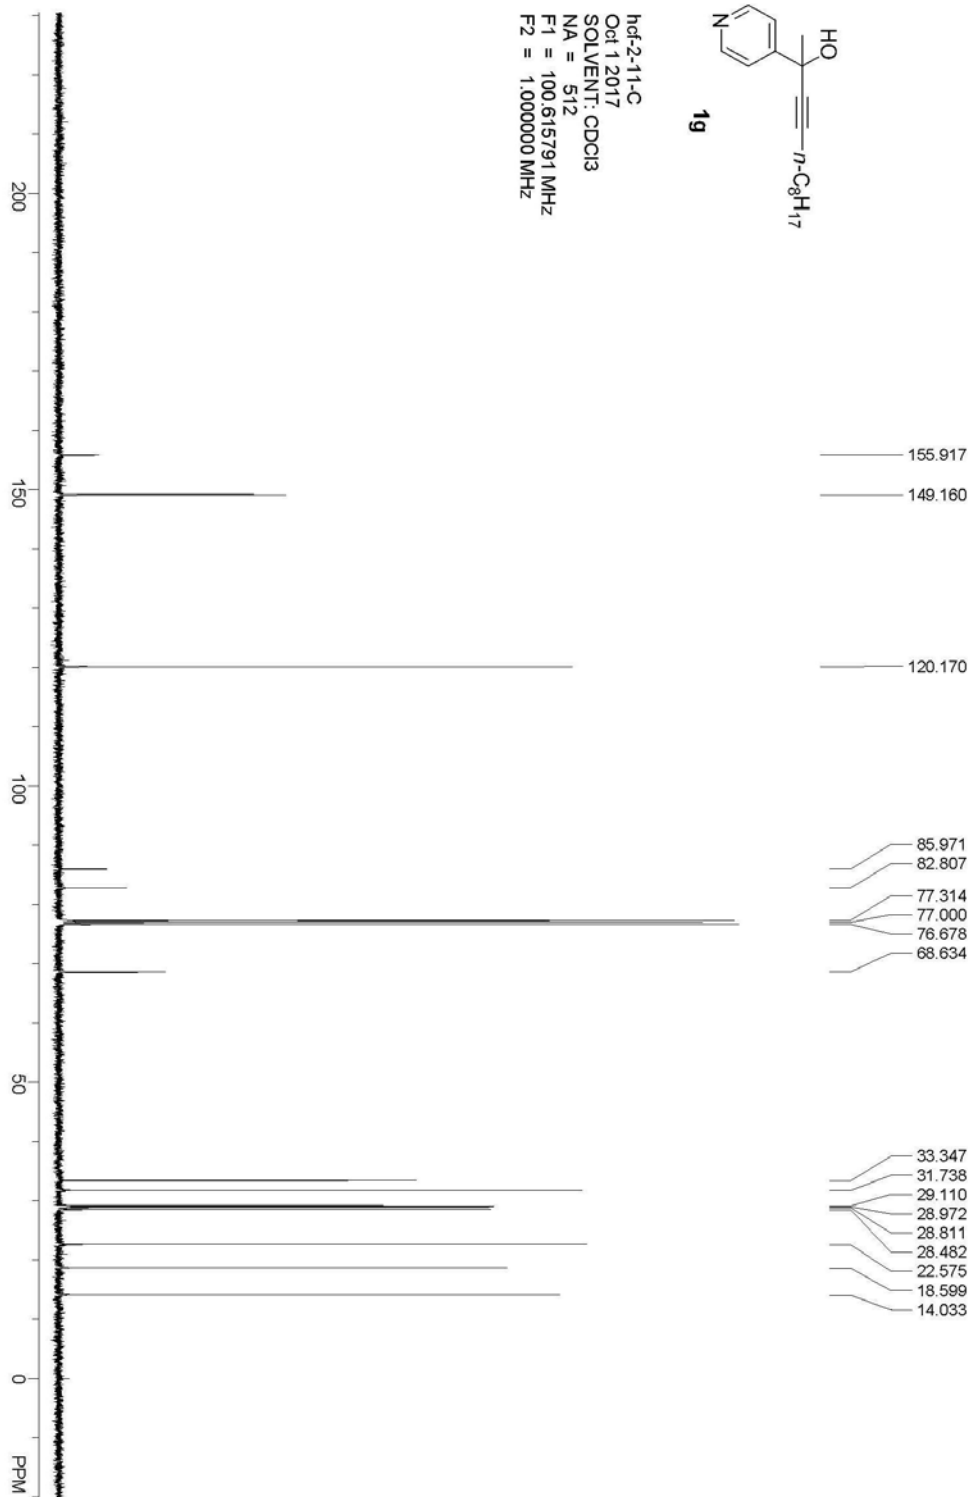



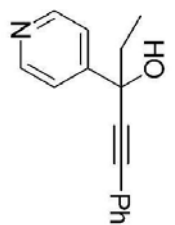

hcf-1-164-C  
May 31 2017  
SOLVENT: cdcl3  
NA = 1000  
F1 = 100.527557 MHz  
F2 = 399.749146 MHz

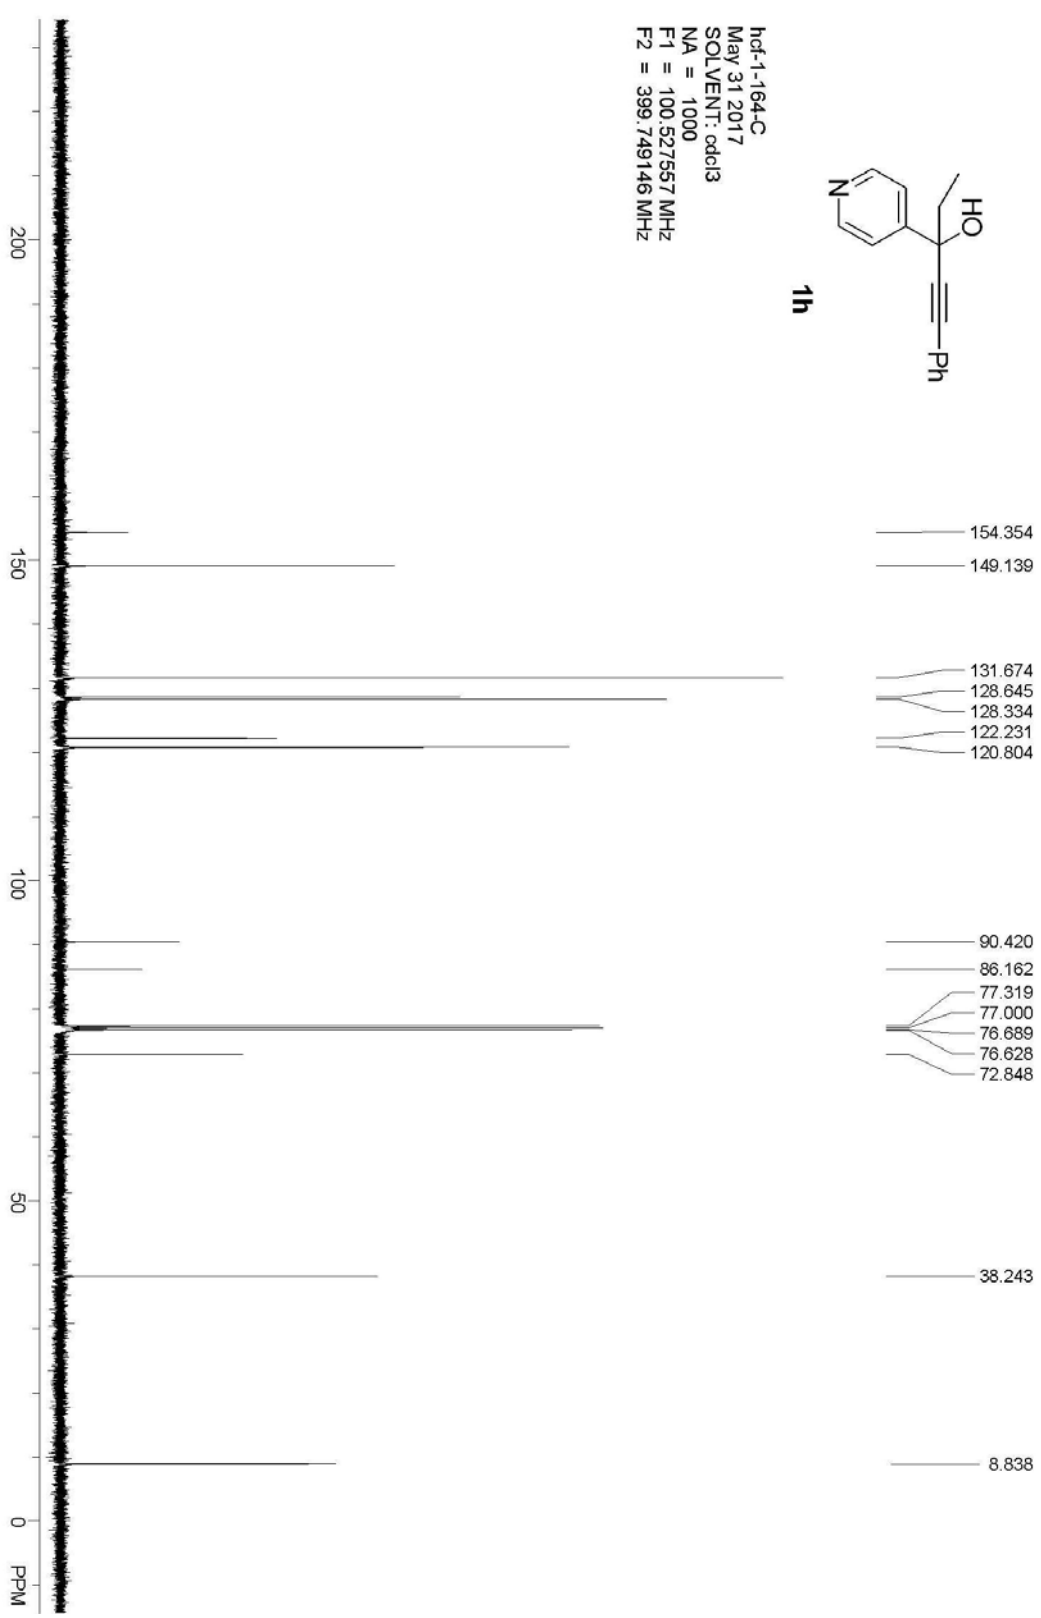

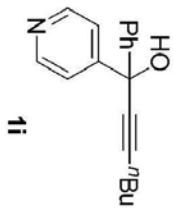

hmf-1-188-H  
 Nov 3 2017  
 SOLVENT: cddcl3  
 NA = 8  
 F1 = 399.749542 MHz  
 F2 = 100.526031 MHz

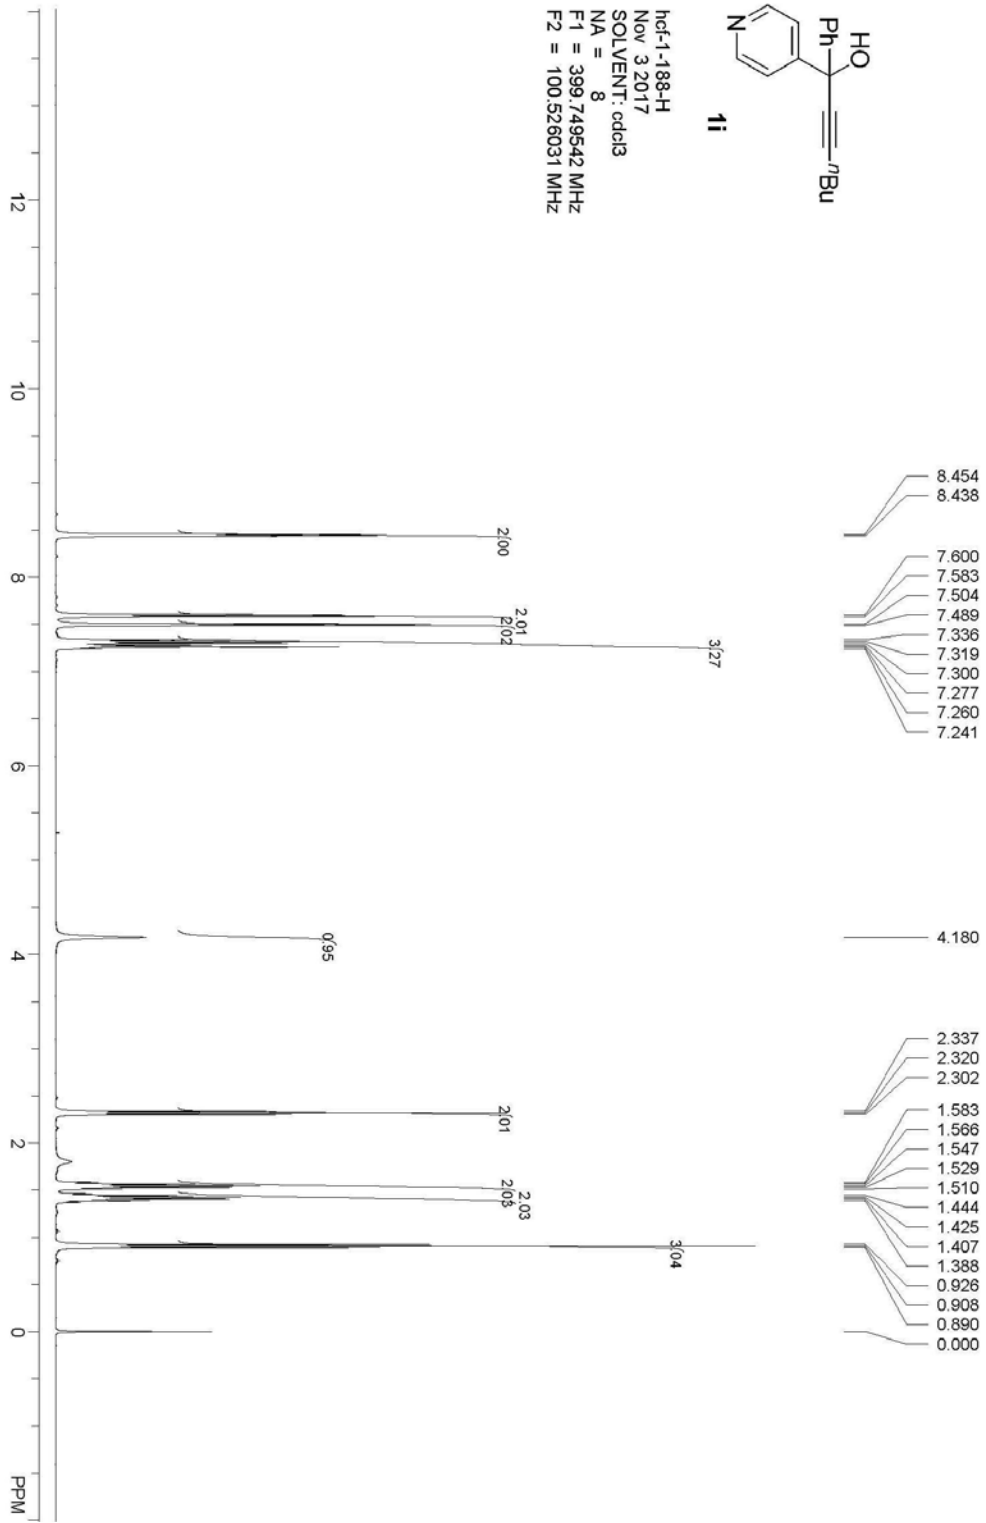

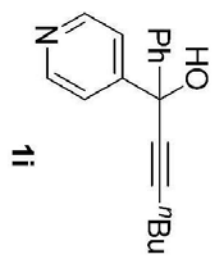

hcf-1-188-C  
Sep 1 2017  
SOLVENT: cdcl3  
NA = 1000  
F1 = 100.527557 MHz  
F2 = 399.749146 MHz

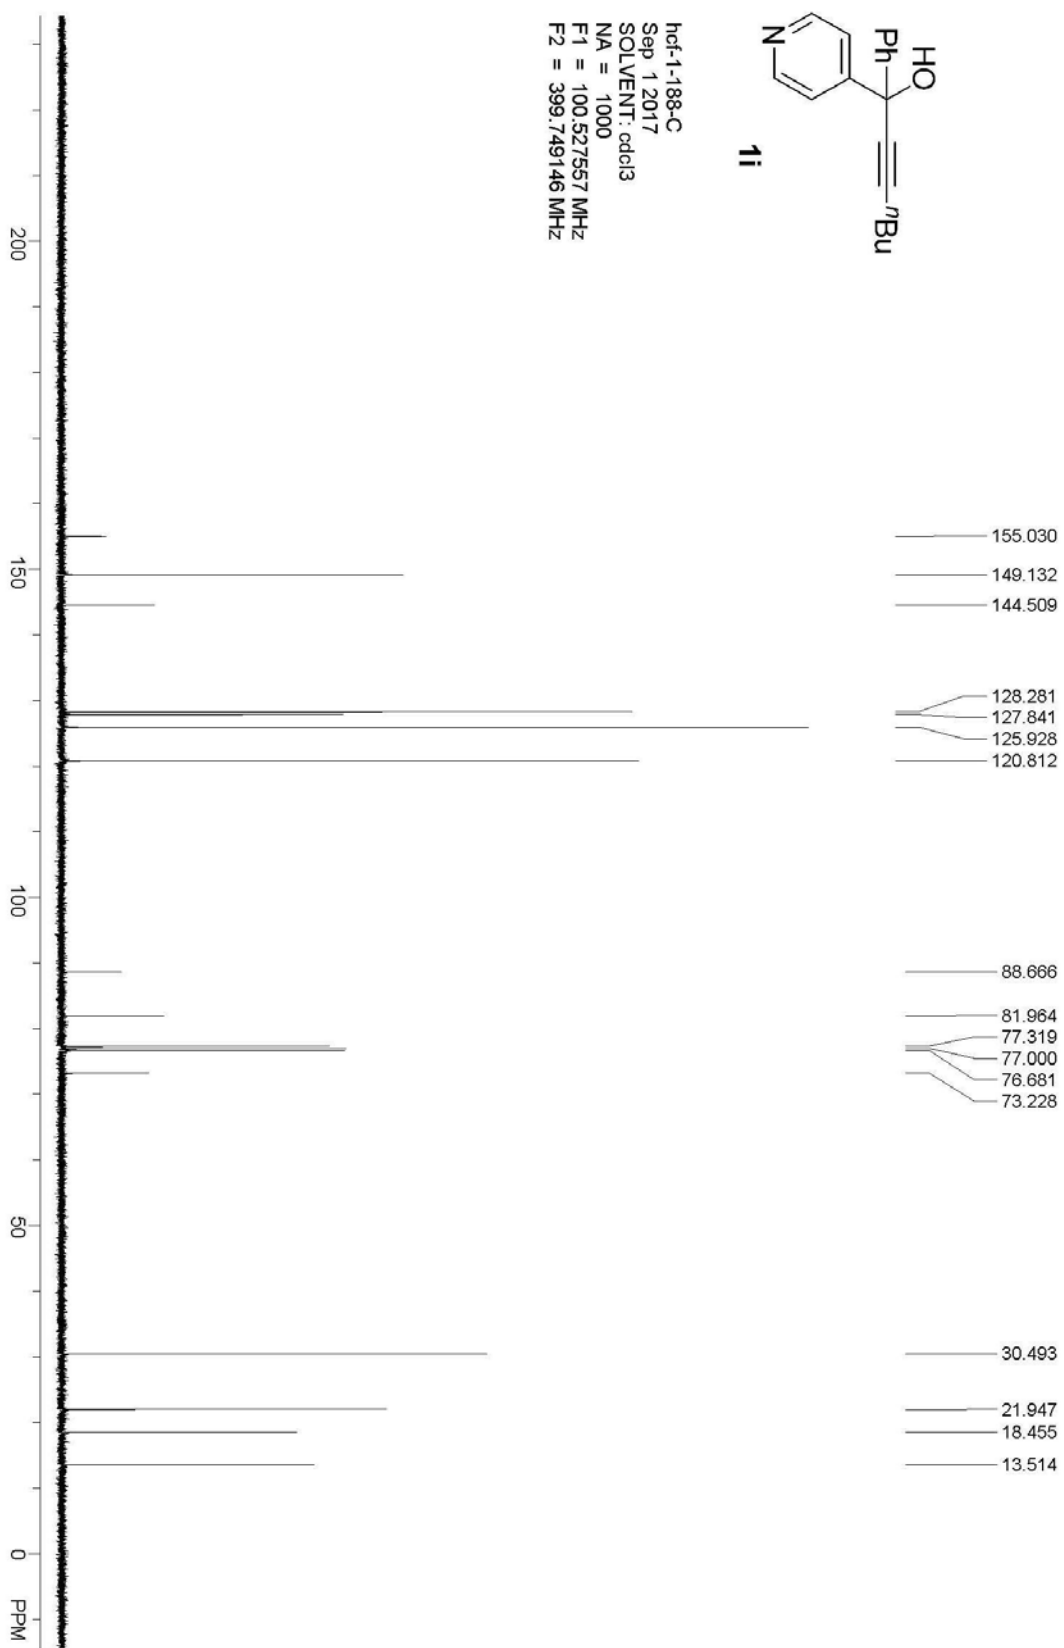

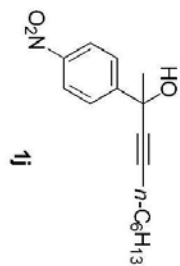

hcf:2-52-H  
 Nov 9 2017  
 SOLVENT: cdcl3  
 NA = 8  
 F1 = 399.749542 MHz  
 F2 = 100.526031 MHz

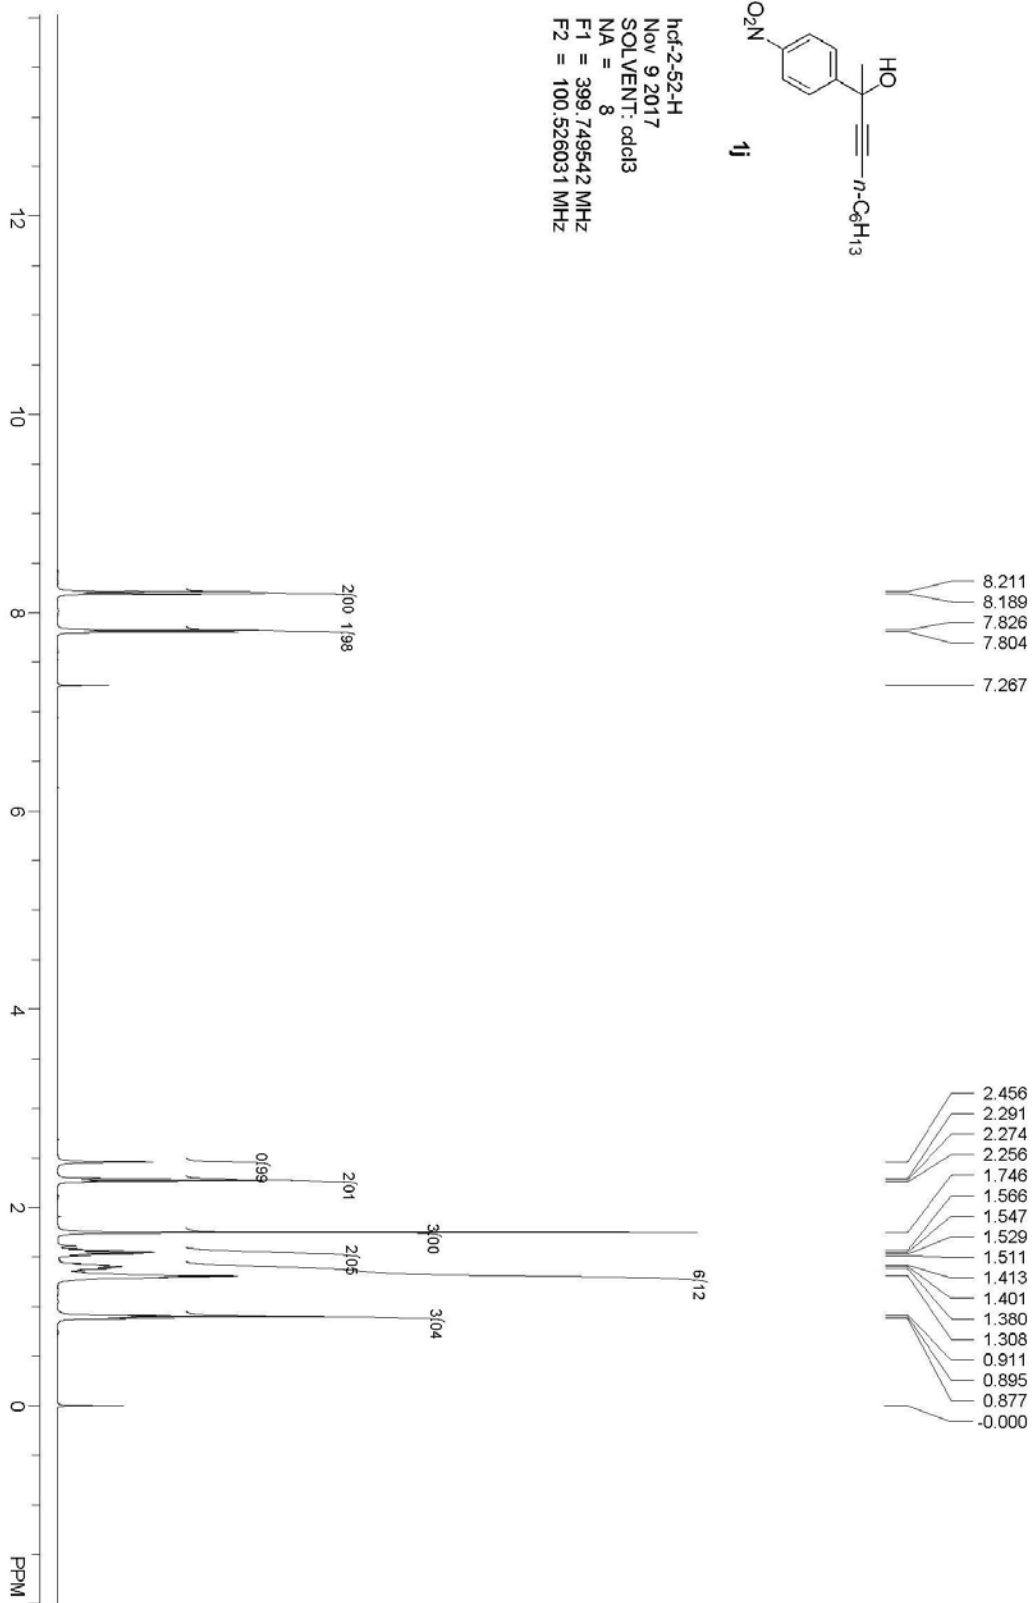

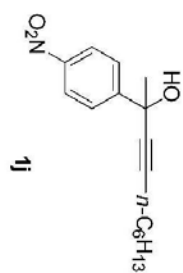

hof-2-52-C  
 Nov 9 2017  
 SOLVENT: cdcl3  
 NA = 512  
 F1 = 100.527557 MHz  
 F2 = 399.749146 MHz

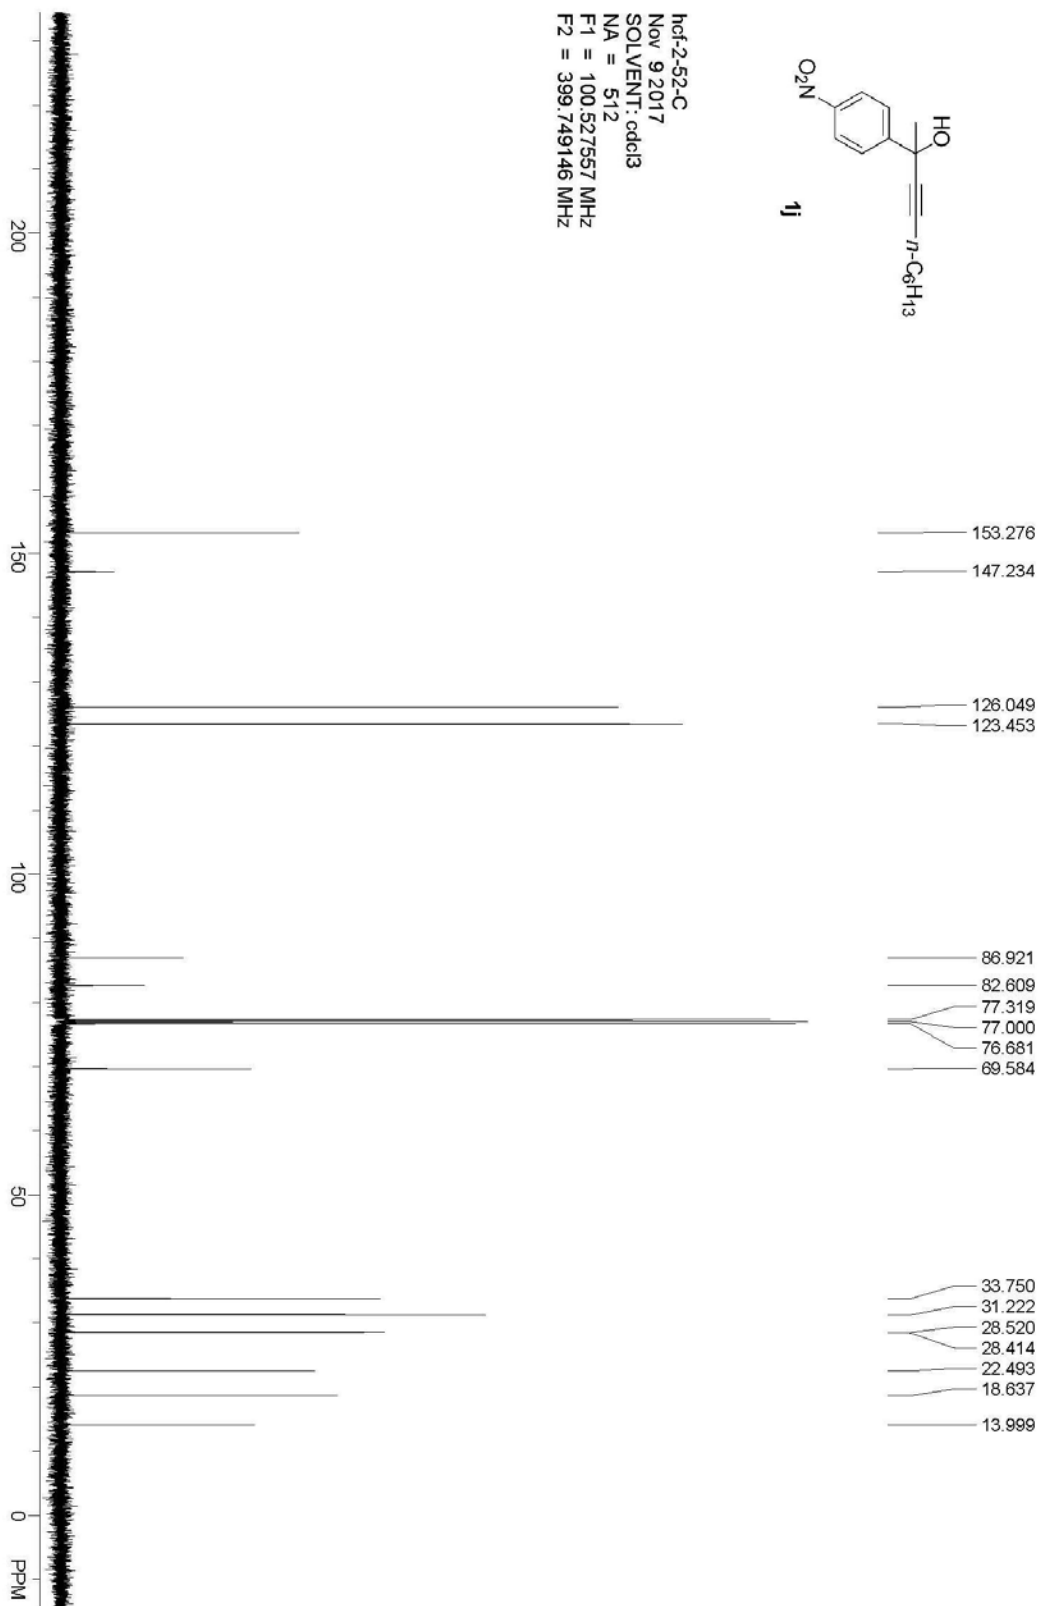

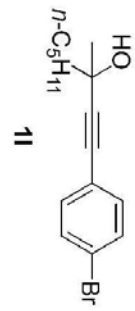

hcf-2-56-H  
 Dec 4 2017  
 SOLVENT: cdcl3  
 NA = 8  
 F1 = 399.749542 MHz  
 F2 = 100.526031 MHz

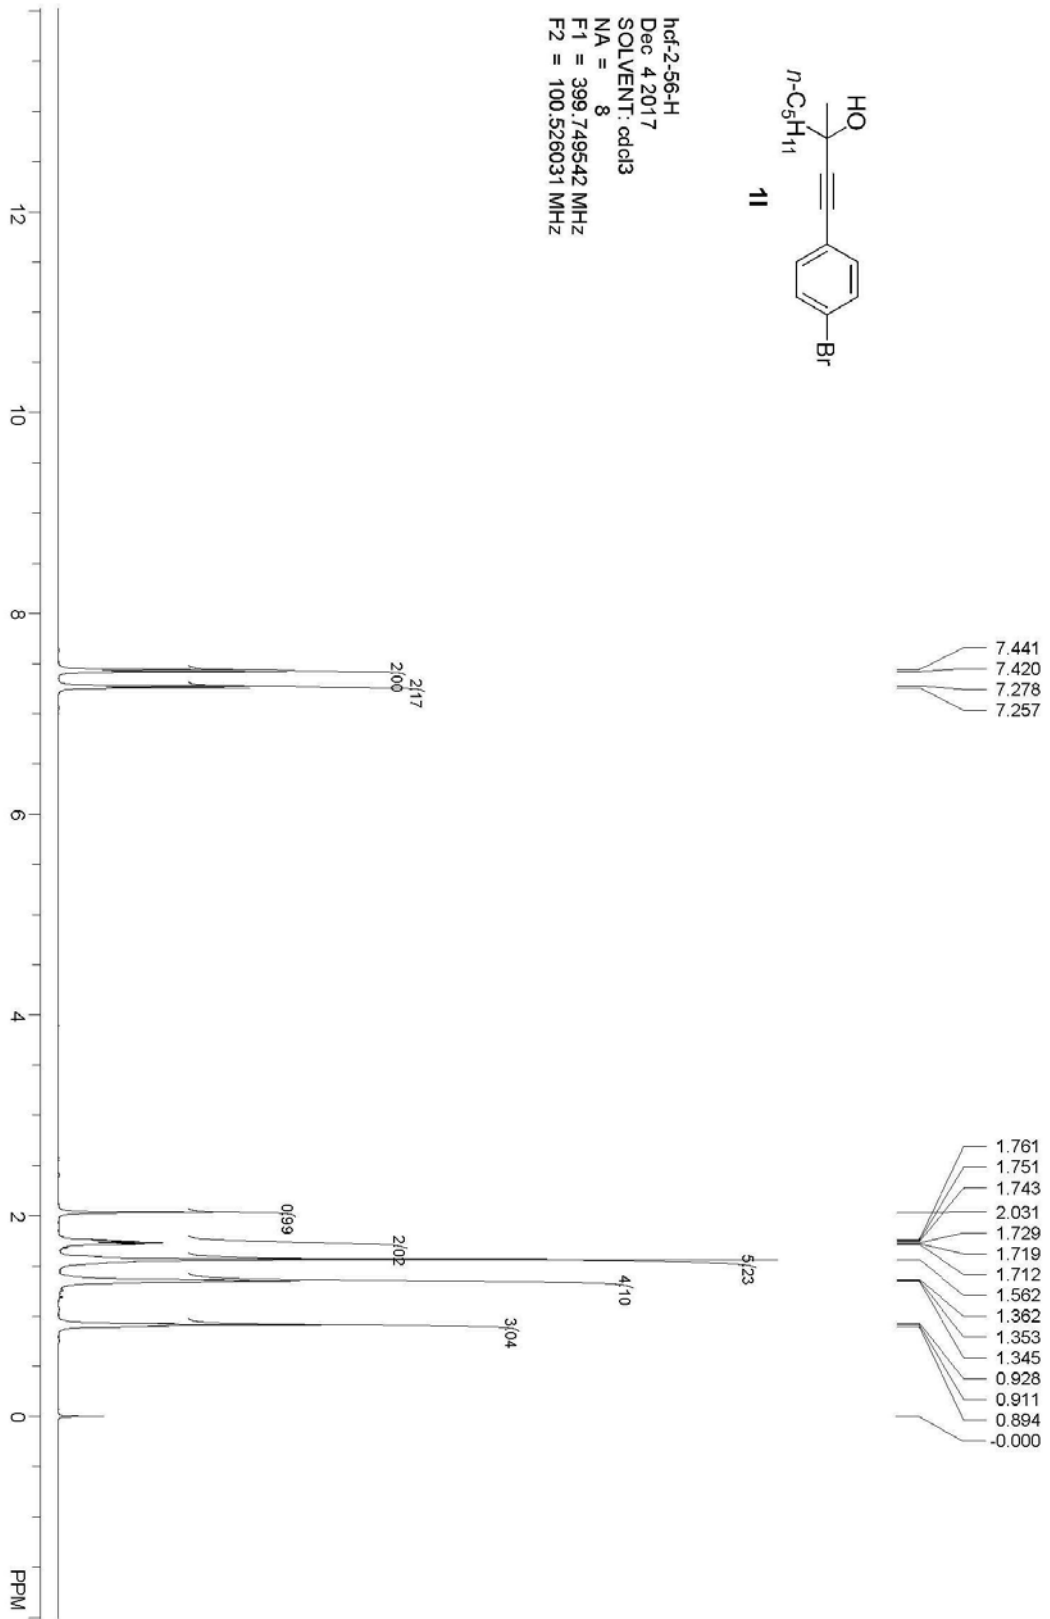



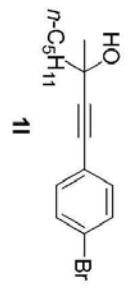

hcf:2-56-C  
 Nov 9 2017  
 SOLVENT: cdcl3  
 NA = 512  
 F1 = 100.527557 MHz  
 F2 = 399.749146 MHz

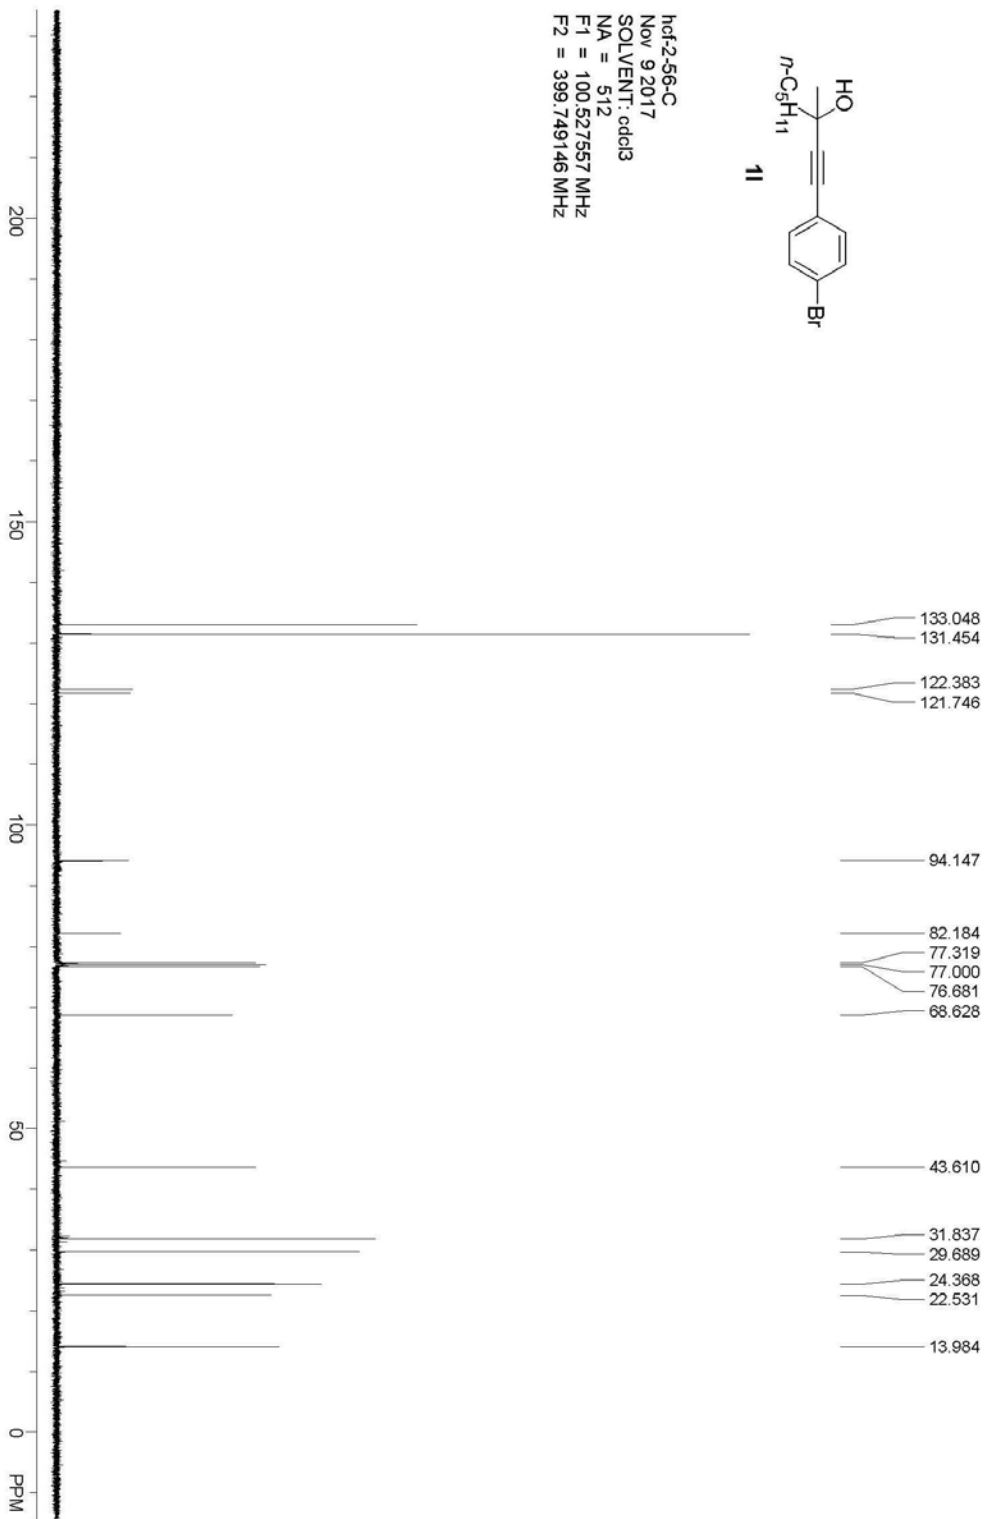

7.269

2.194  
2.177  
2.159  
1.921  
1.908  
1.896  
1.637  
1.622  
1.615  
1.600  
1.585  
1.554  
1.543  
1.537  
1.528  
1.520  
1.504  
1.488  
1.469  
1.446  
1.381  
1.361  
1.347  
1.324  
1.276  
0.973  
0.955  
0.937  
0.900  
0.884  
0.867  
-0.000

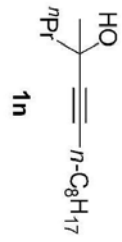

zwl-11-164-H  
Mon Sep 24 10:15:22 2018  
SOLVENT: CDCl3  
NA = 8  
F1 = 400.132477 MHz  
F2 = 1.000000 MHz

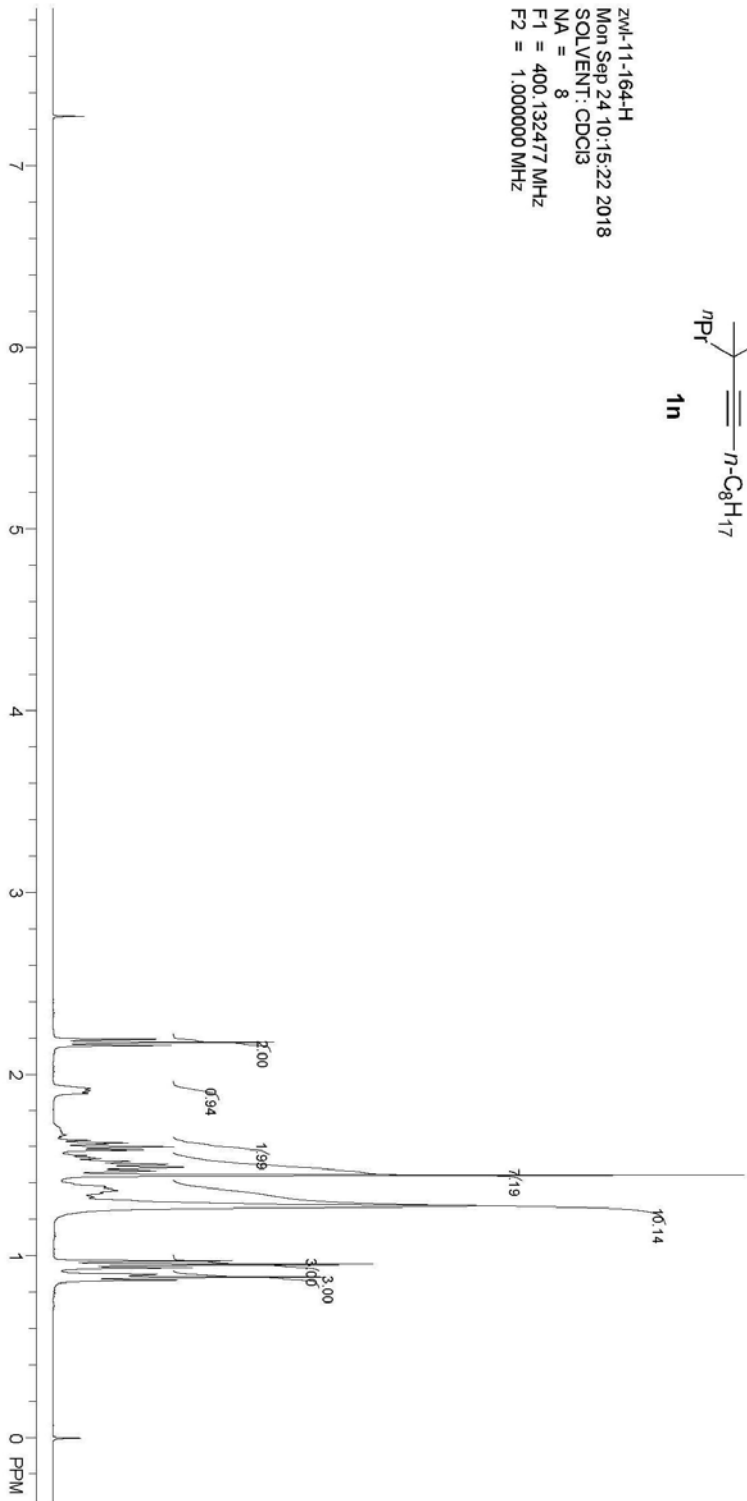

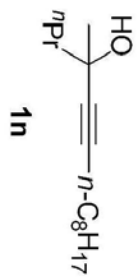

Zwl-11-164-C  
 Mon Sep 24 10:44:32 2018  
 SOLVENT: CDCl3  
 NA = 512  
 F1 = 100.623833 MHz  
 F2 = 1.000000 MHz

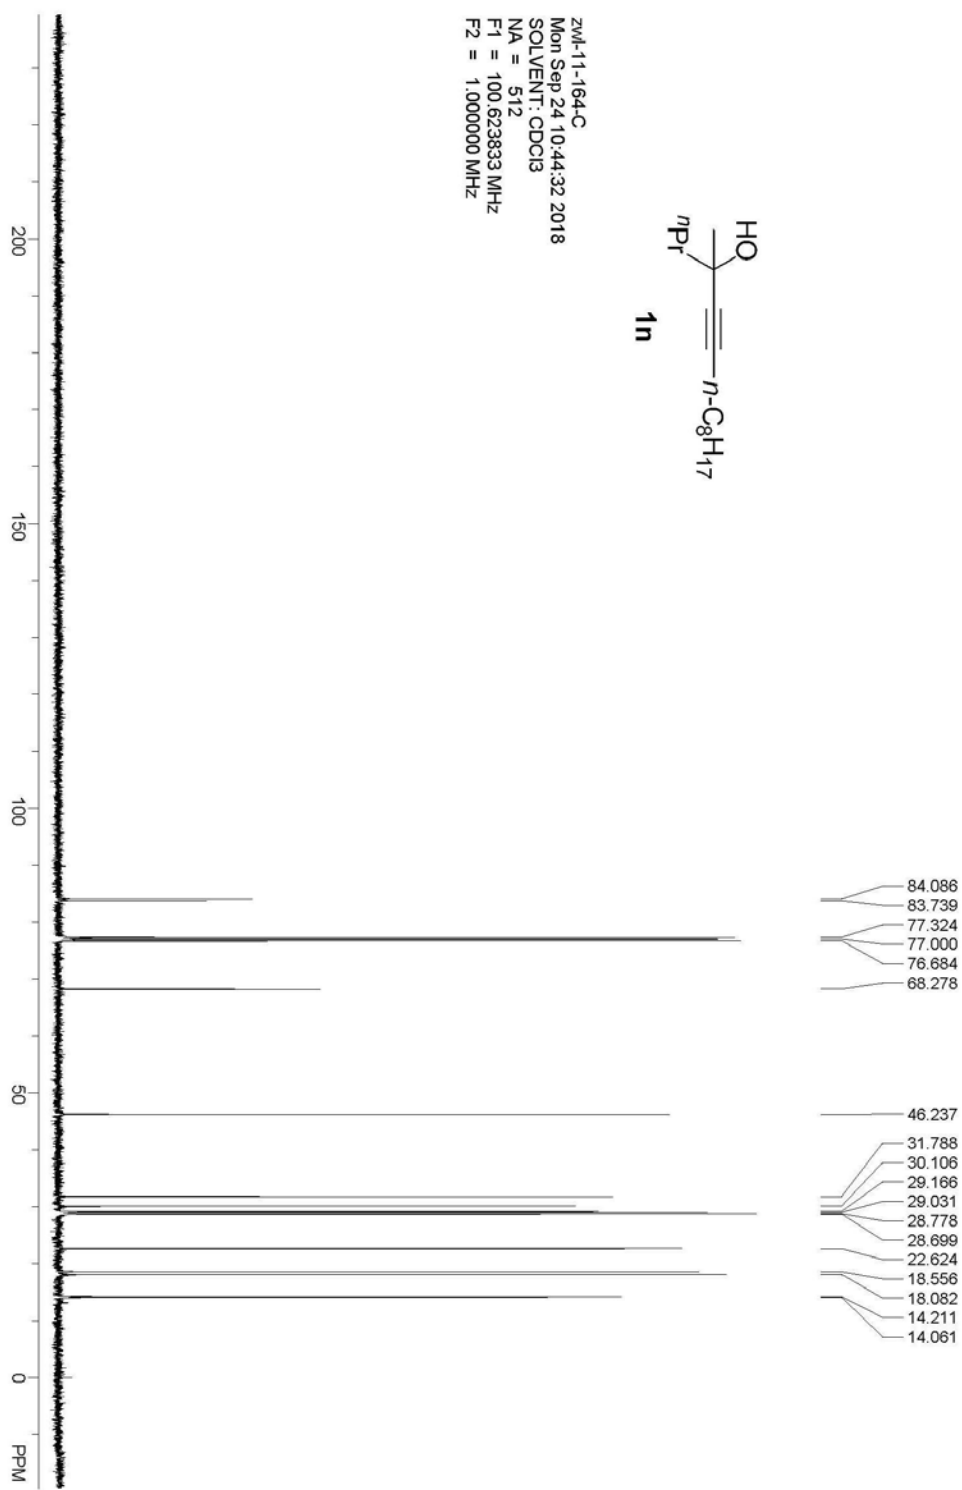

zwk-1-166-H  
 Mon Sep 24 11:20:56 2018  
 SOLVENT: CDCl3  
 NA = 8  
 F1 = 400.132477 MHz  
 F2 = 1.000000 MHz

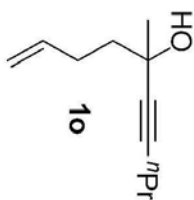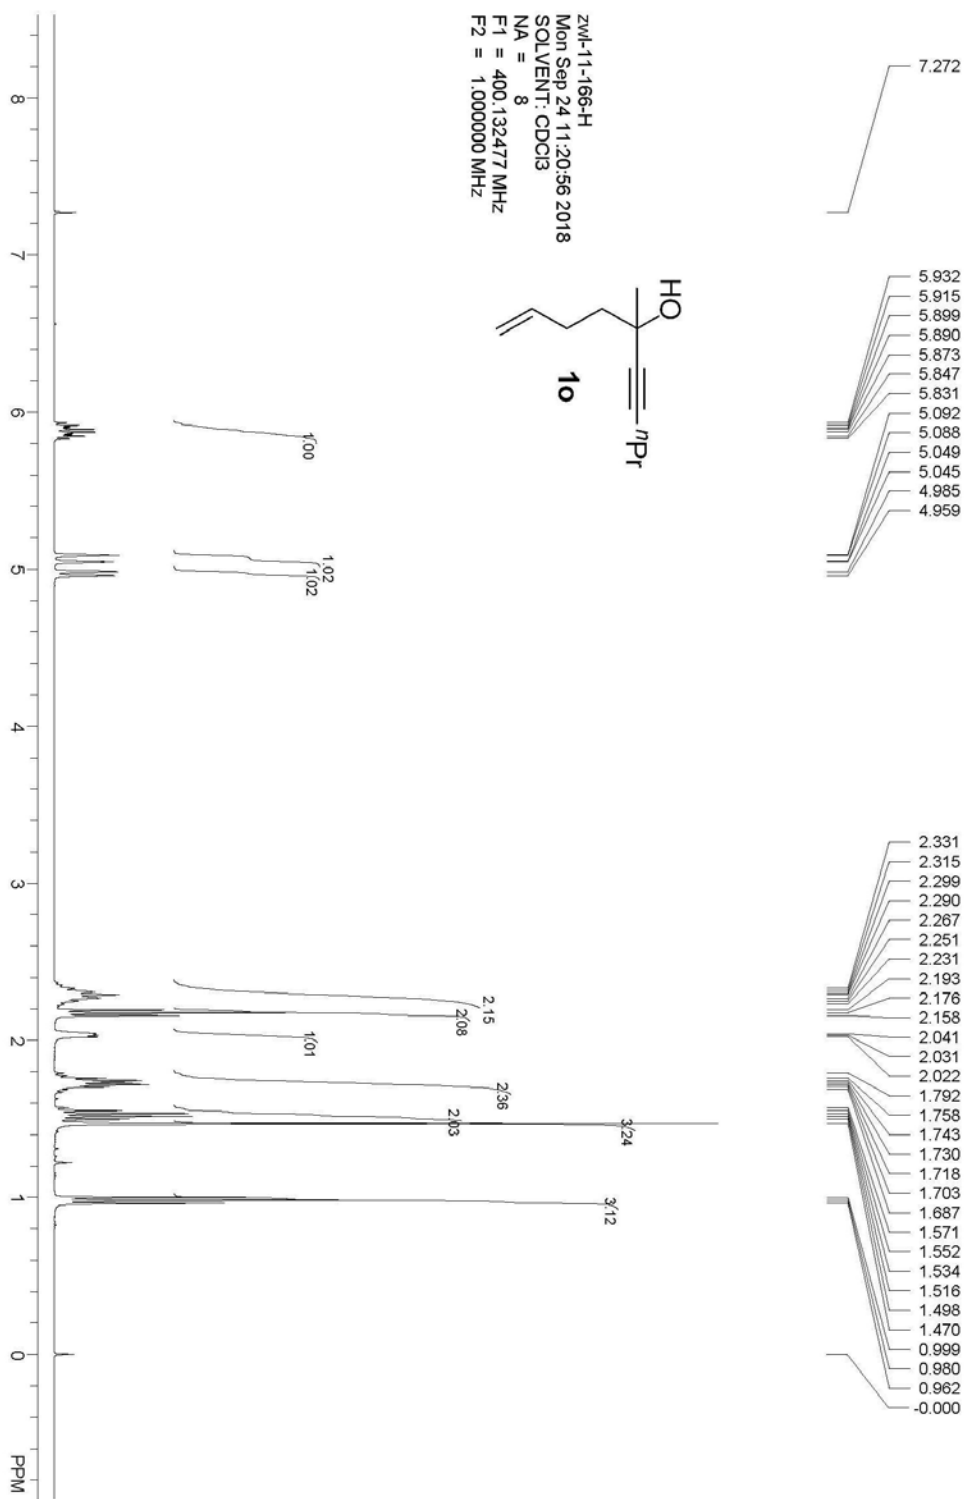

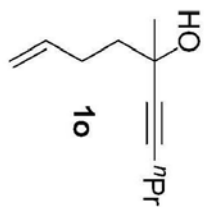

zwl-11-166-C  
Mon Sep 24 11:50:06 2018  
SOLVENT: CDCl3  
NA = 512  
F1 = 100.623833 MHz  
F2 = 1.000000 MHz

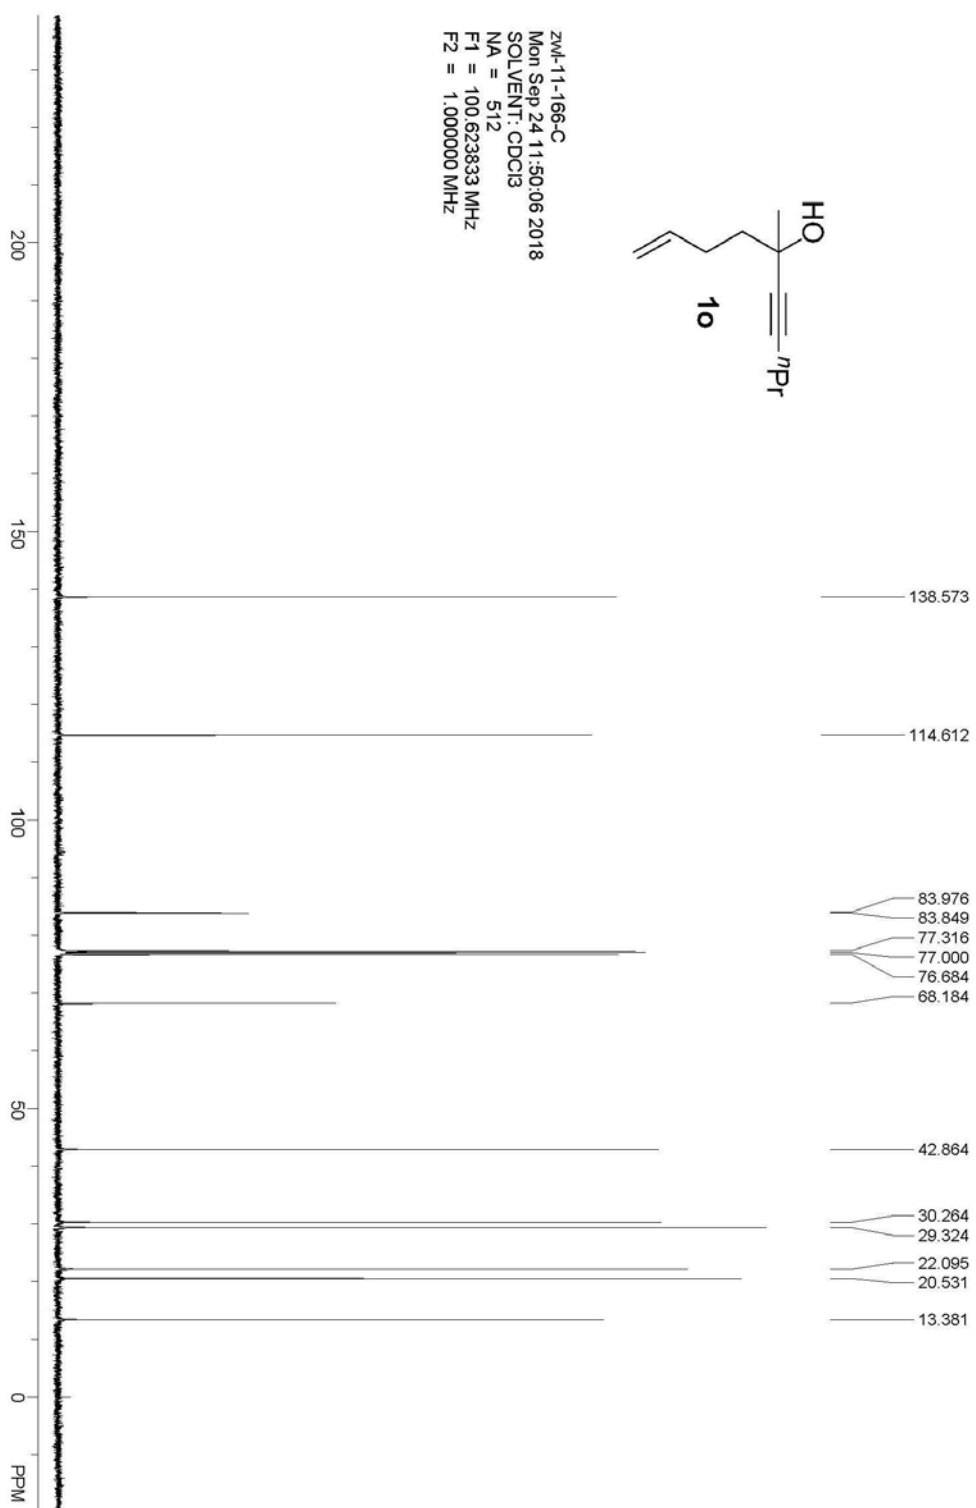

zwl-11-185-H  
Tue Oct 09 20:36:31 2018  
SOLVENT: CDCl3  
NA = 8  
F1 = 400.132477 MHz  
F2 = 1.000000 MHz

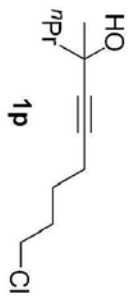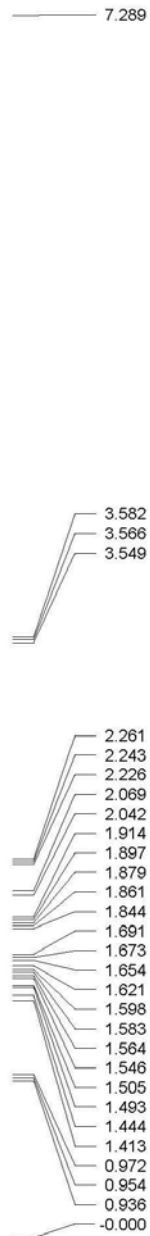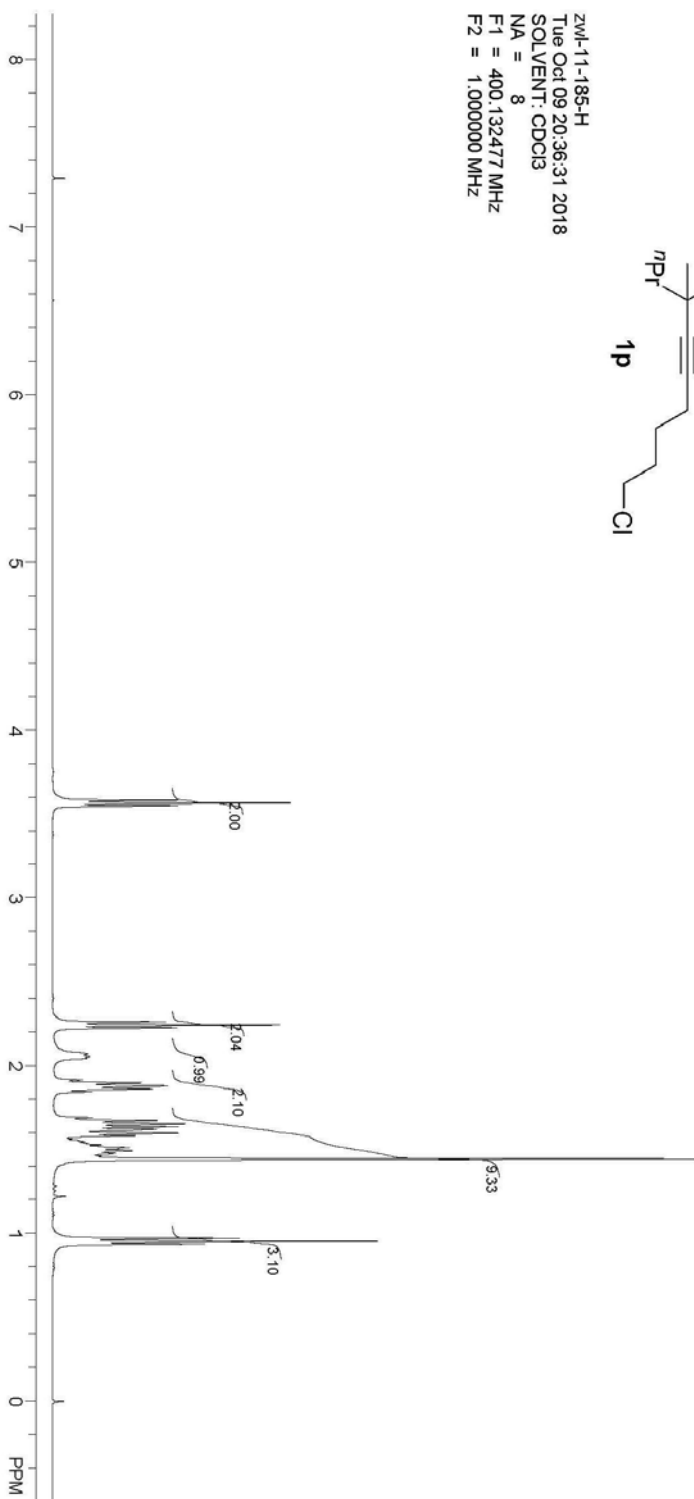

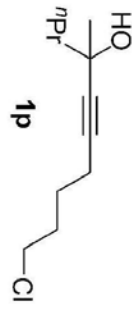

ZWL-11-185-C  
Tue Oct 09 21:34:03 2018  
SOLVENT: CDCl3  
NA = 1024  
F1 = 100.623833 MHz  
F2 = 1.000000 MHz

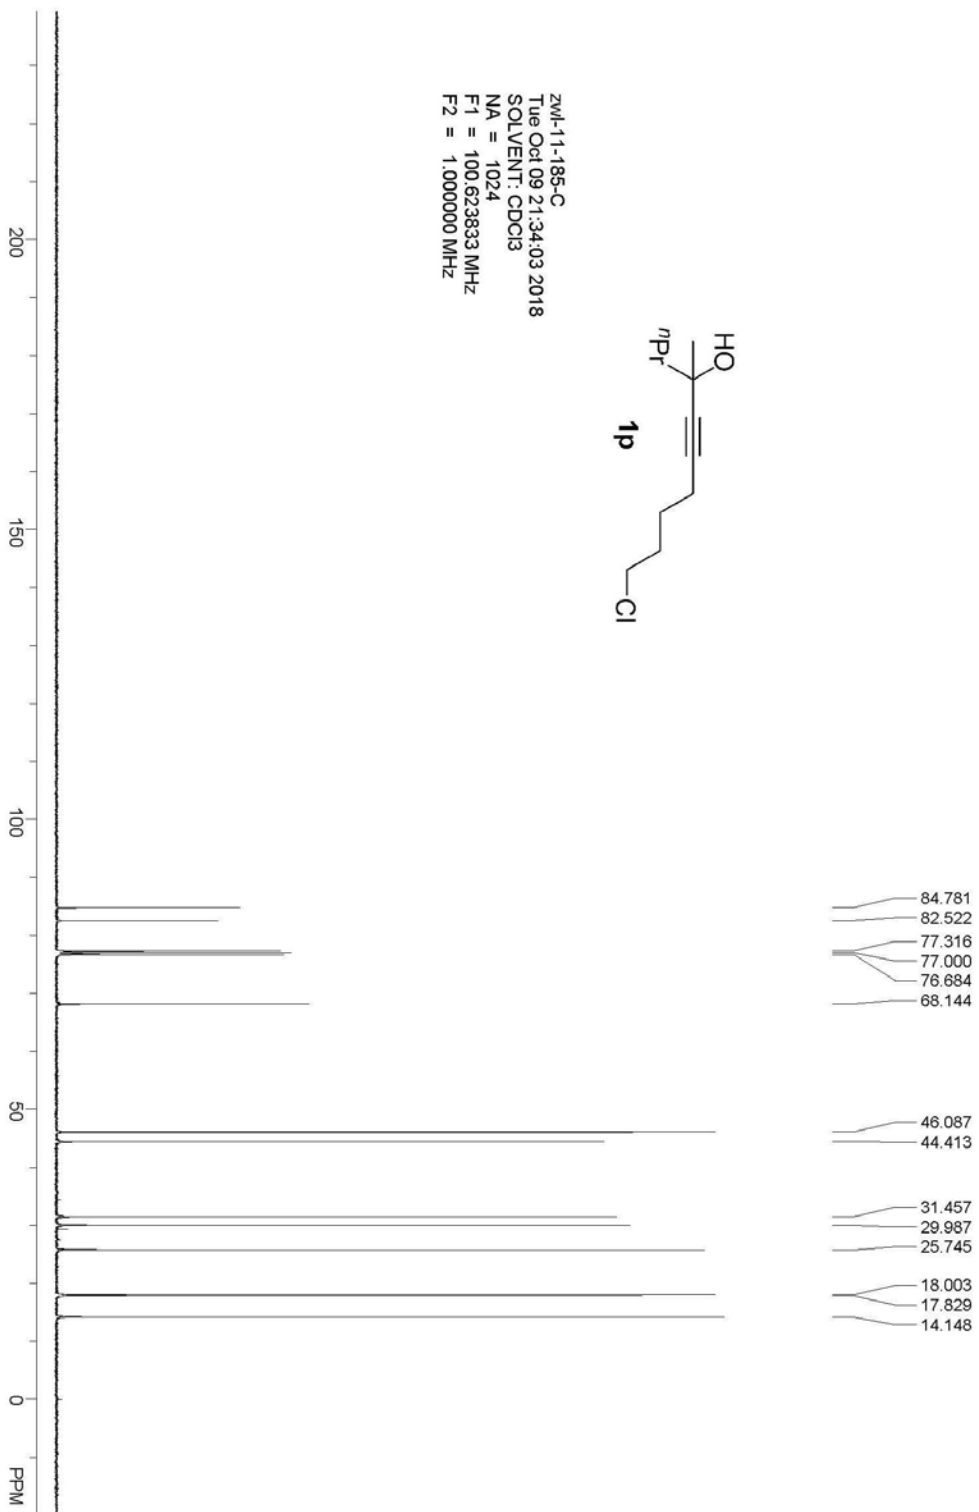

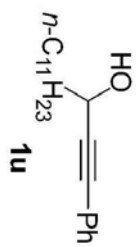

hcf-2-71-H  
Dec 2 2017  
SOLVENT: cdcl3  
NA = 8  
F1 = 399.749542 MHz  
F2 = 100.526031 MHz

- 7.433
- 7.428
- 7.419
- 7.409
- 7.297
- 7.291
- 7.284
- 7.246
  
- 4.610
- 4.595
- 4.581
- 4.565
  
- 1.824
- 1.814
- 1.806
- 2.197
- 1.793
- 1.776
- 1.767
- 1.759
- 1.524
- 1.507
- 1.490
- 1.314
- 1.260
- 0.896
- 0.879
- 0.861
- 0.000

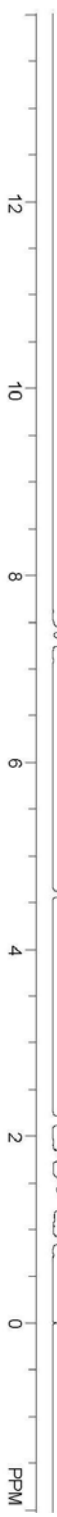

2.96  
2.00  
0.97  
2.08  
2.10  
2.98  
1.604



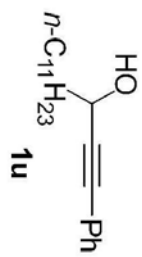

hdf-2-71-C  
Dec 2 2017  
SOLVENT: cdcl3  
NA = 1000  
F1 = 100.527557 MHz  
F2 = 399.749146 MHz

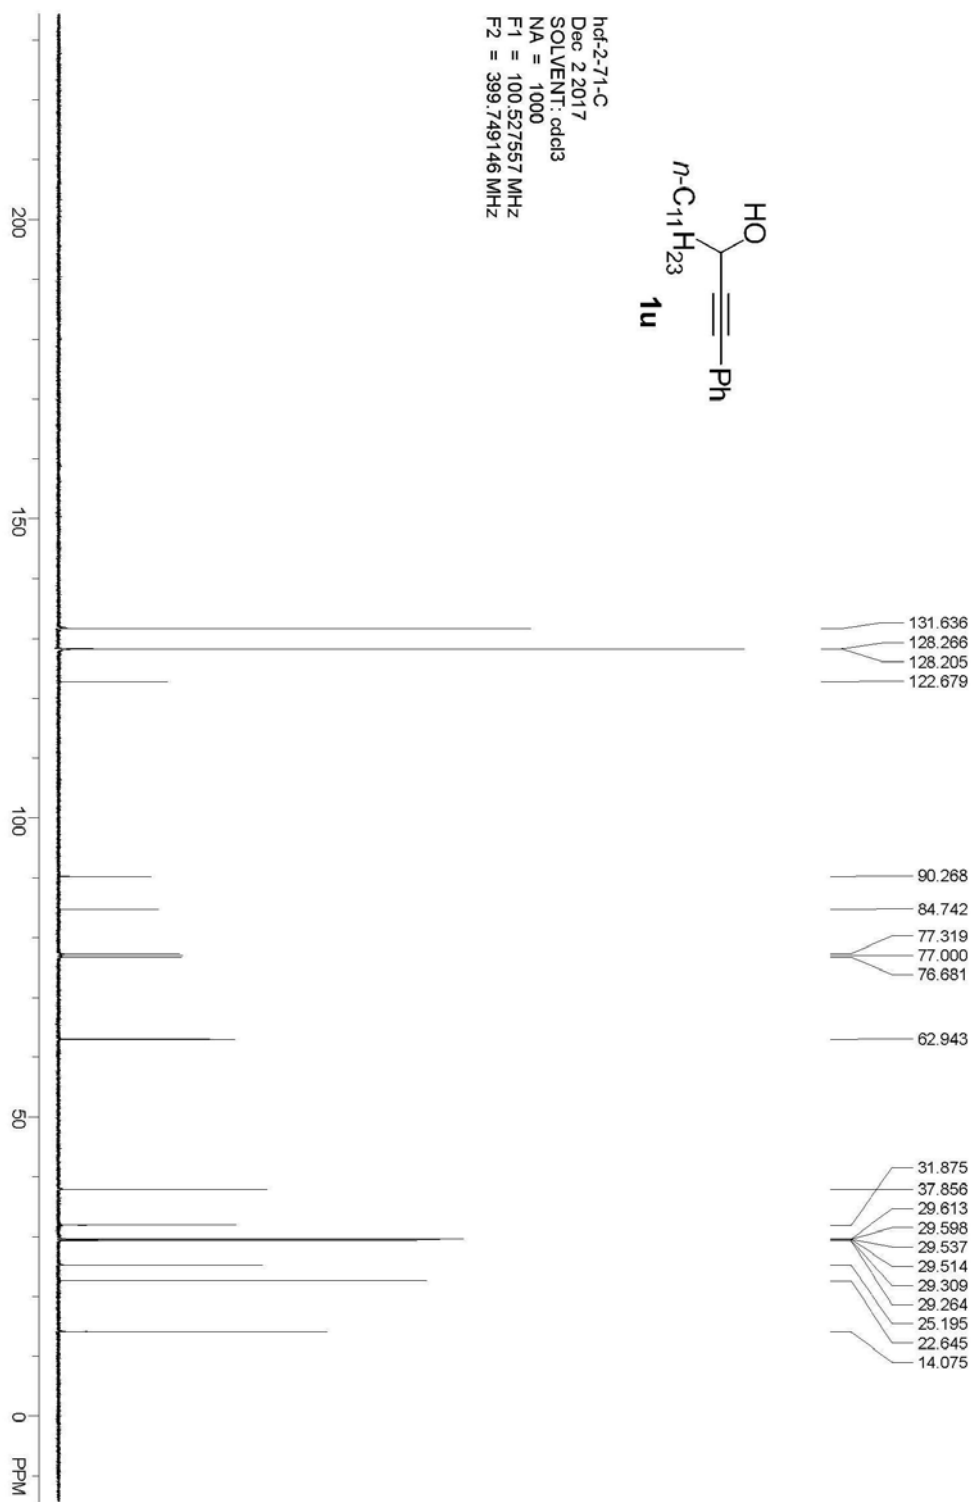

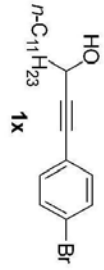

hcf-2-109-H  
 Jan 13 2018  
 SOLVENT: cdcl3  
 NA = 4  
 F1 = 399.749542 MHz  
 F2 = 100.526031 MHz

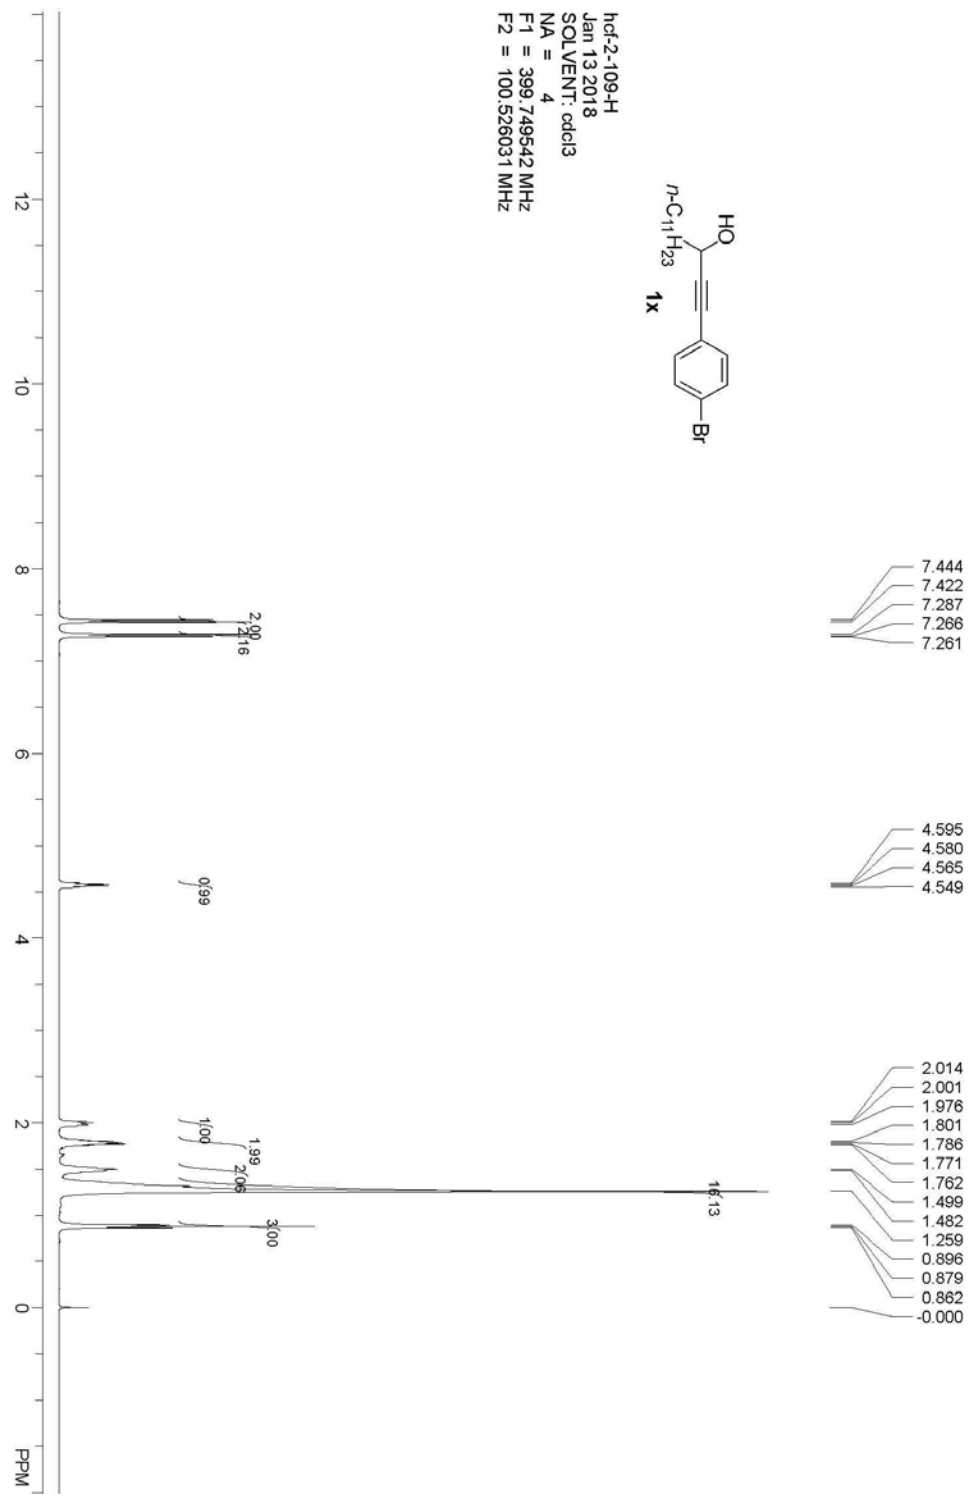

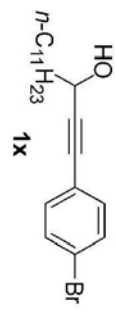

hcf-2-109-C  
 Jan 13 2018  
 SOLVENT: cdcl3  
 NA = 512  
 F1 = 100.527557 MHz  
 F2 = 399.749146 MHz

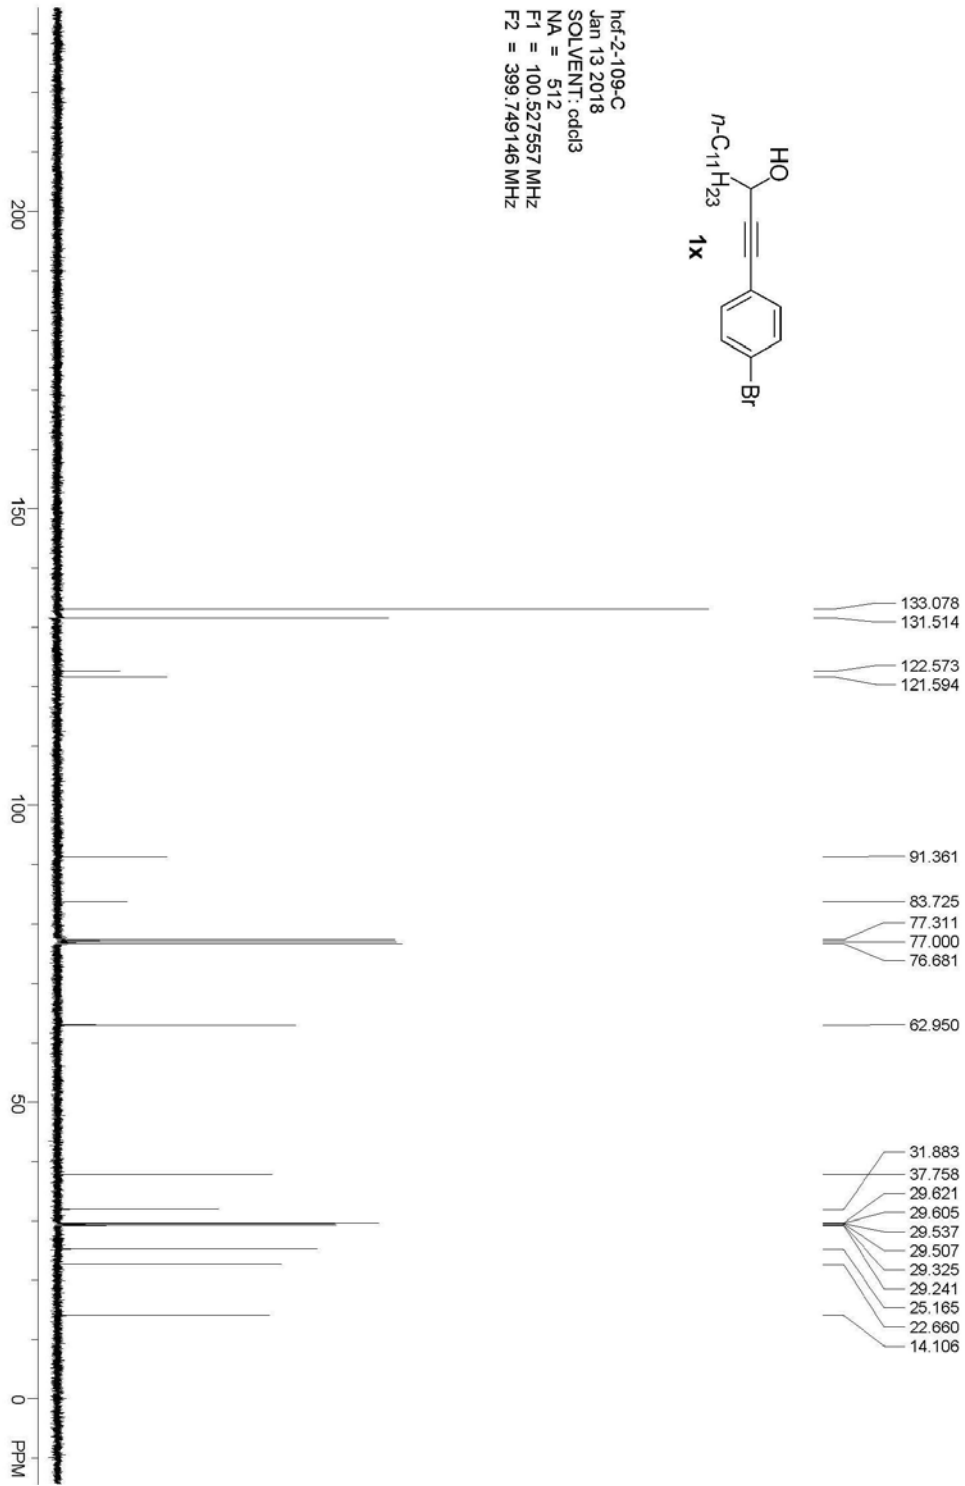

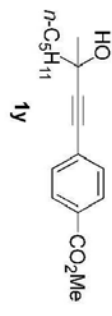

hcf-3-138-H  
 Feb 22 2019  
 SOLVENT: CDCl3  
 NA = 4  
 F1 = 400.130005 MHz  
 F2 = 1.000000 MHz

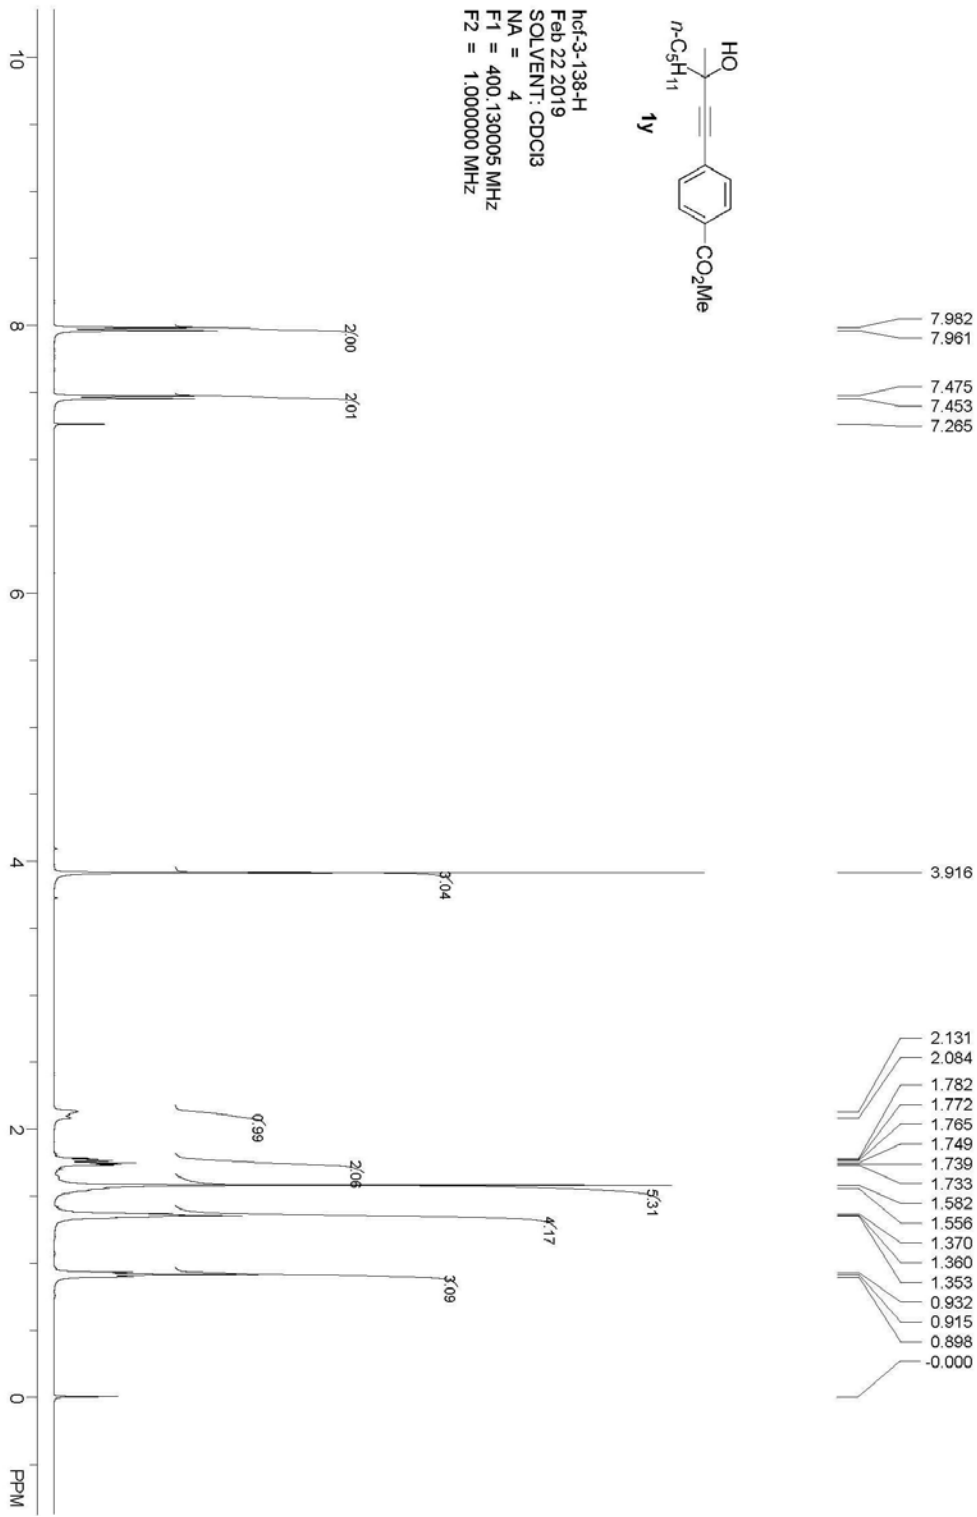

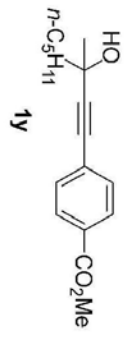

hcf-3-138-C  
 Feb 22 2019  
 SOLVENT: CDCl3  
 NA = 256  
 F1 = 100.612770 MHz  
 F2 = 1.0000000 MHz

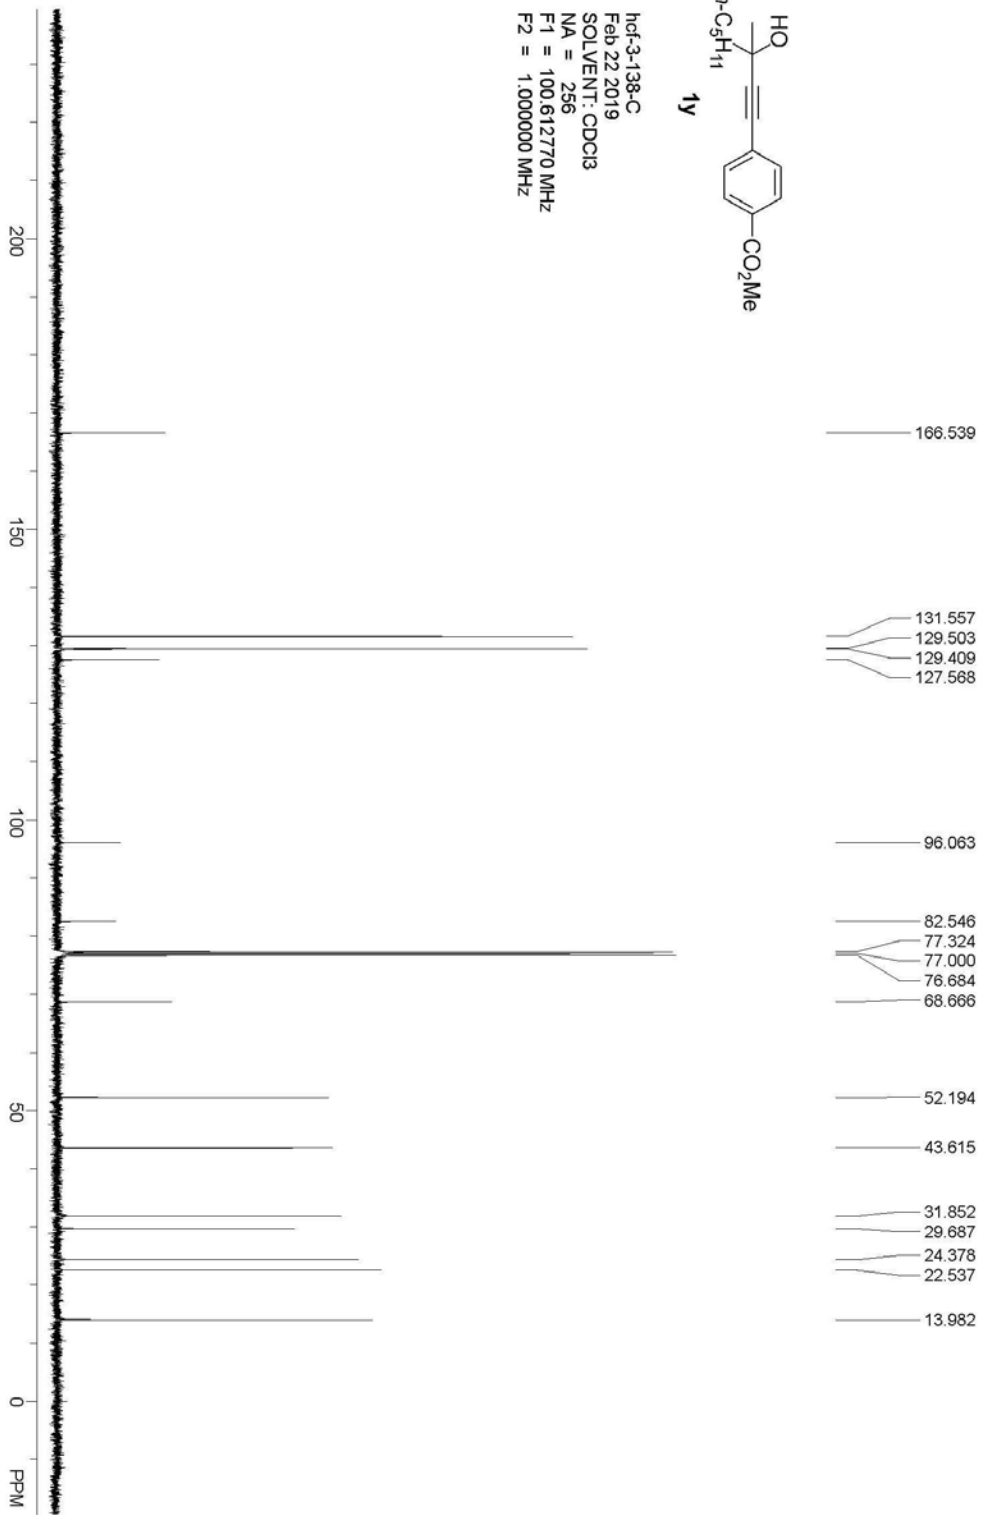

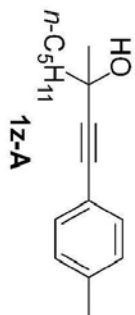

hcf-3-139-H  
 Feb 23 2019  
 SOLVENT: CDCl3  
 NA = 4  
 F1 = 400.130005 MHz  
 F2 = 1.000000 MHz

7.314  
 7.294  
 7.256  
 7.112  
 7.092

2.009  
 2.339  
 1.998  
 1.761  
 1.752  
 1.744  
 1.729  
 1.719  
 1.712  
 1.564  
 1.365  
 1.356  
 1.347  
 1.339  
 1.329  
 0.929  
 0.912  
 0.894  
 0.000

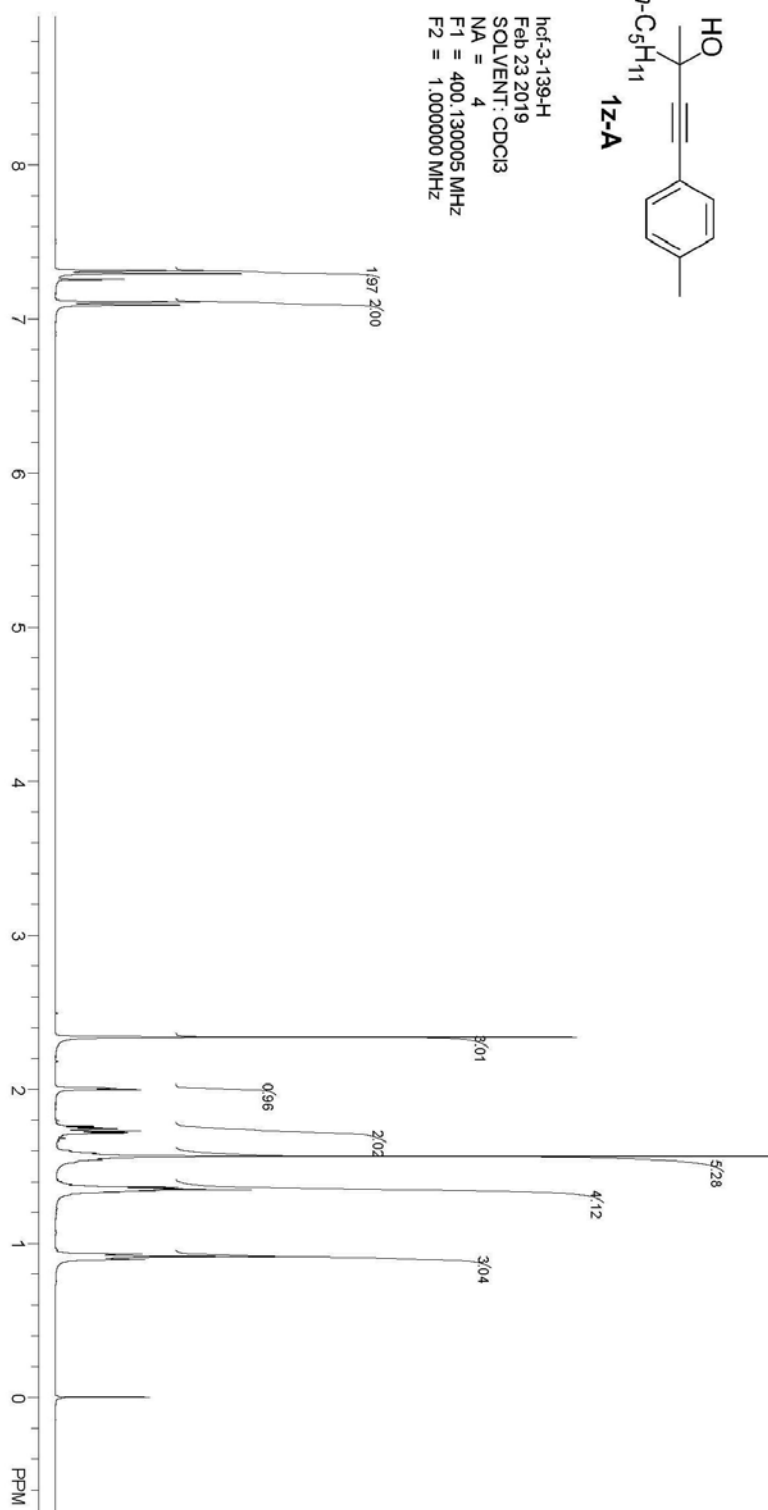

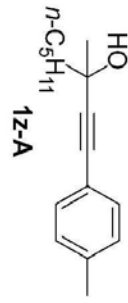

hcf-3-139-C  
 Feb 23 2019  
 SOLVENT: CDCl3  
 NA = 256  
 F1 = 100.612770 MHz  
 F2 = 1.000000 MHz

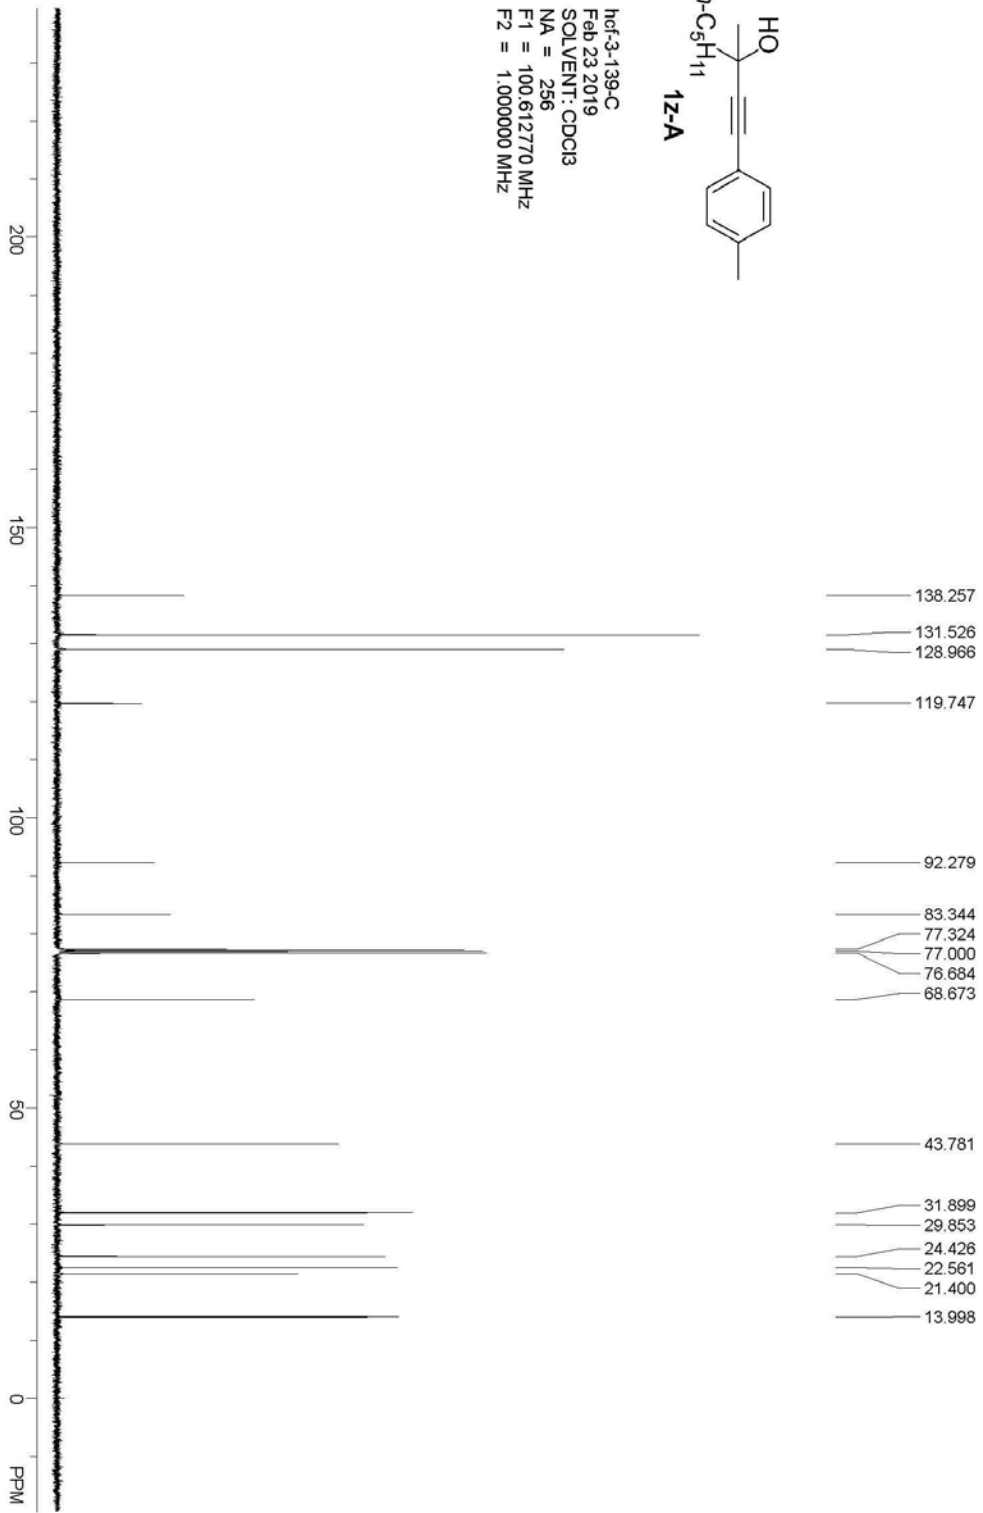

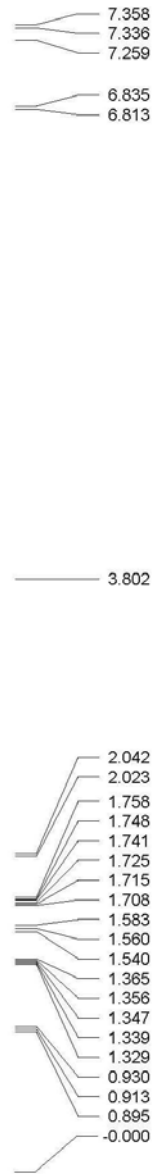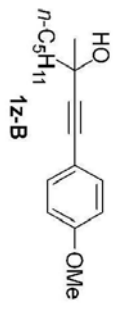

hcf-3-140-H  
 Feb 23 2019  
 SOLVENT: CDCl3  
 NA = 4  
 F1 = 400.130005 MHz  
 F2 = 1.0000000 MHz

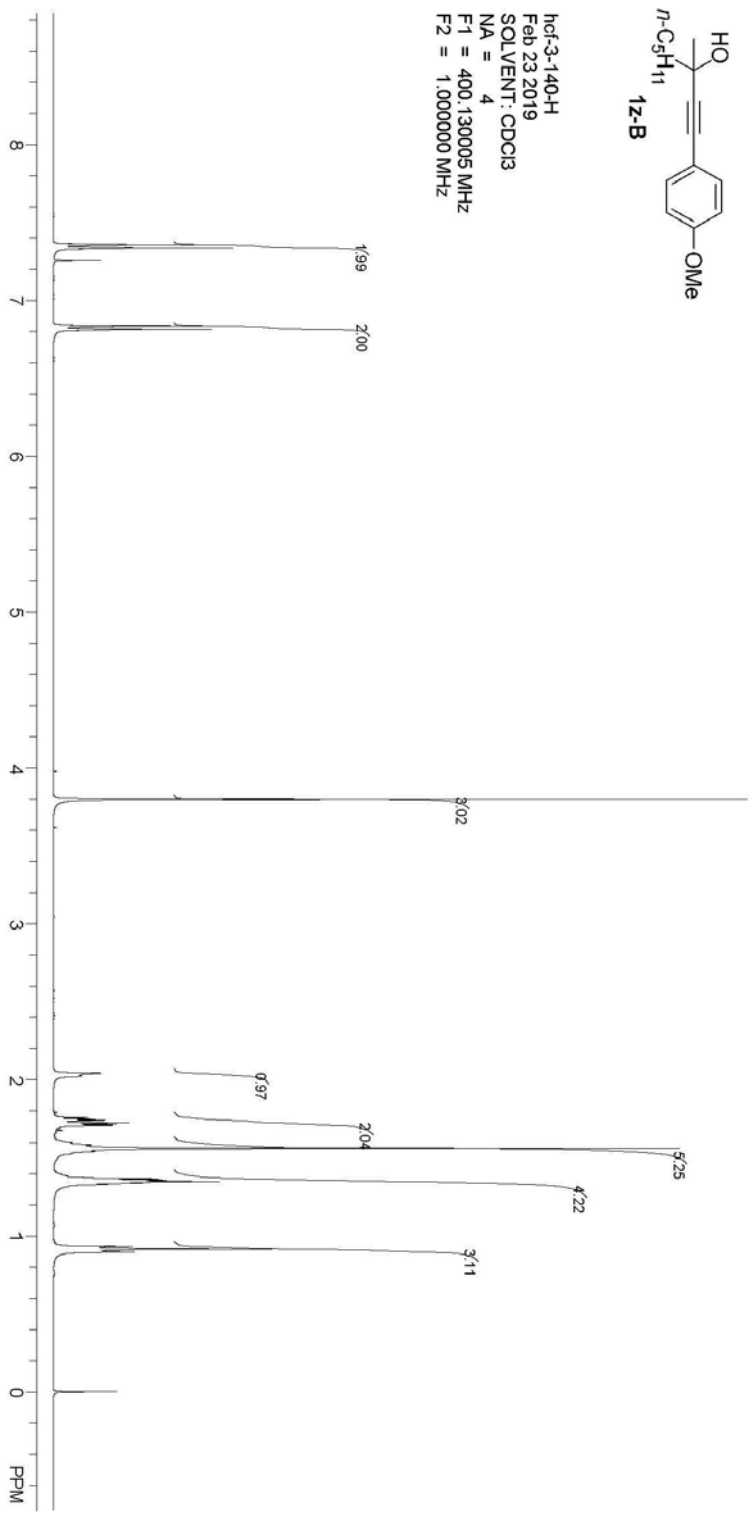



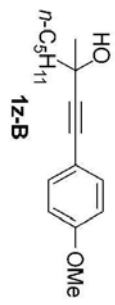

hcf-3-140-C  
 Feb 23 2019  
 SOLVENT: CDCl3  
 NA = 256  
 F1 = 100.612770 MHz  
 F2 = 1.000000 MHz

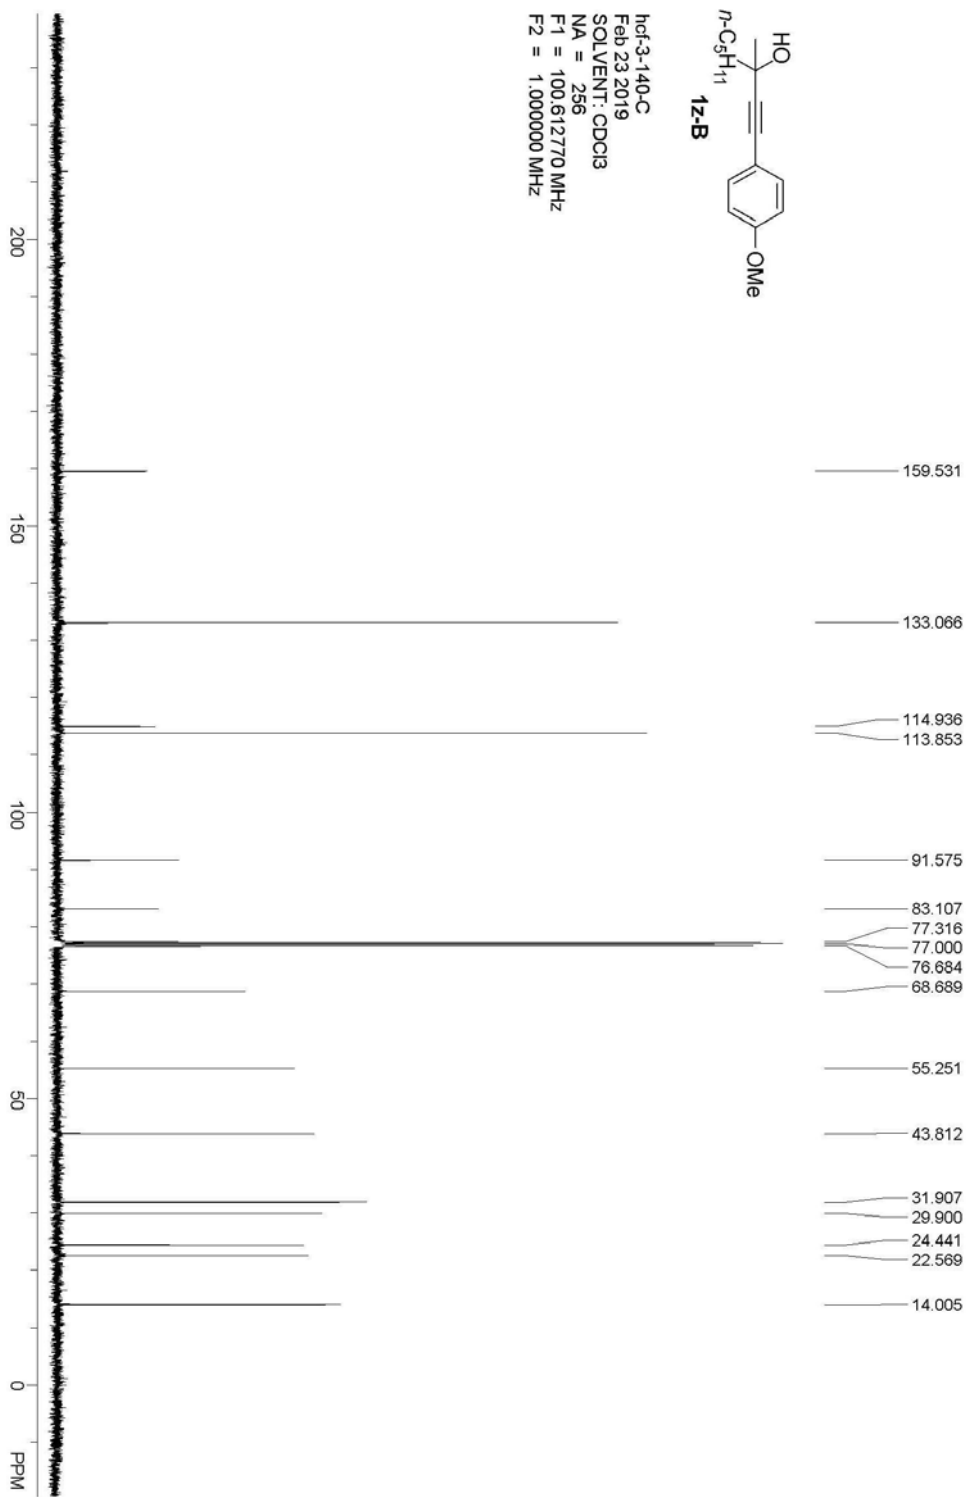

hct-2-93-H  
Jan 4 2018  
SOLVENT: cdcl3  
NA = 4  
F1 = 399.749542 MHz  
F2 = 100.526031 MHz

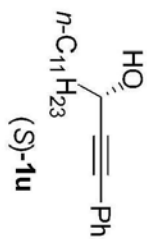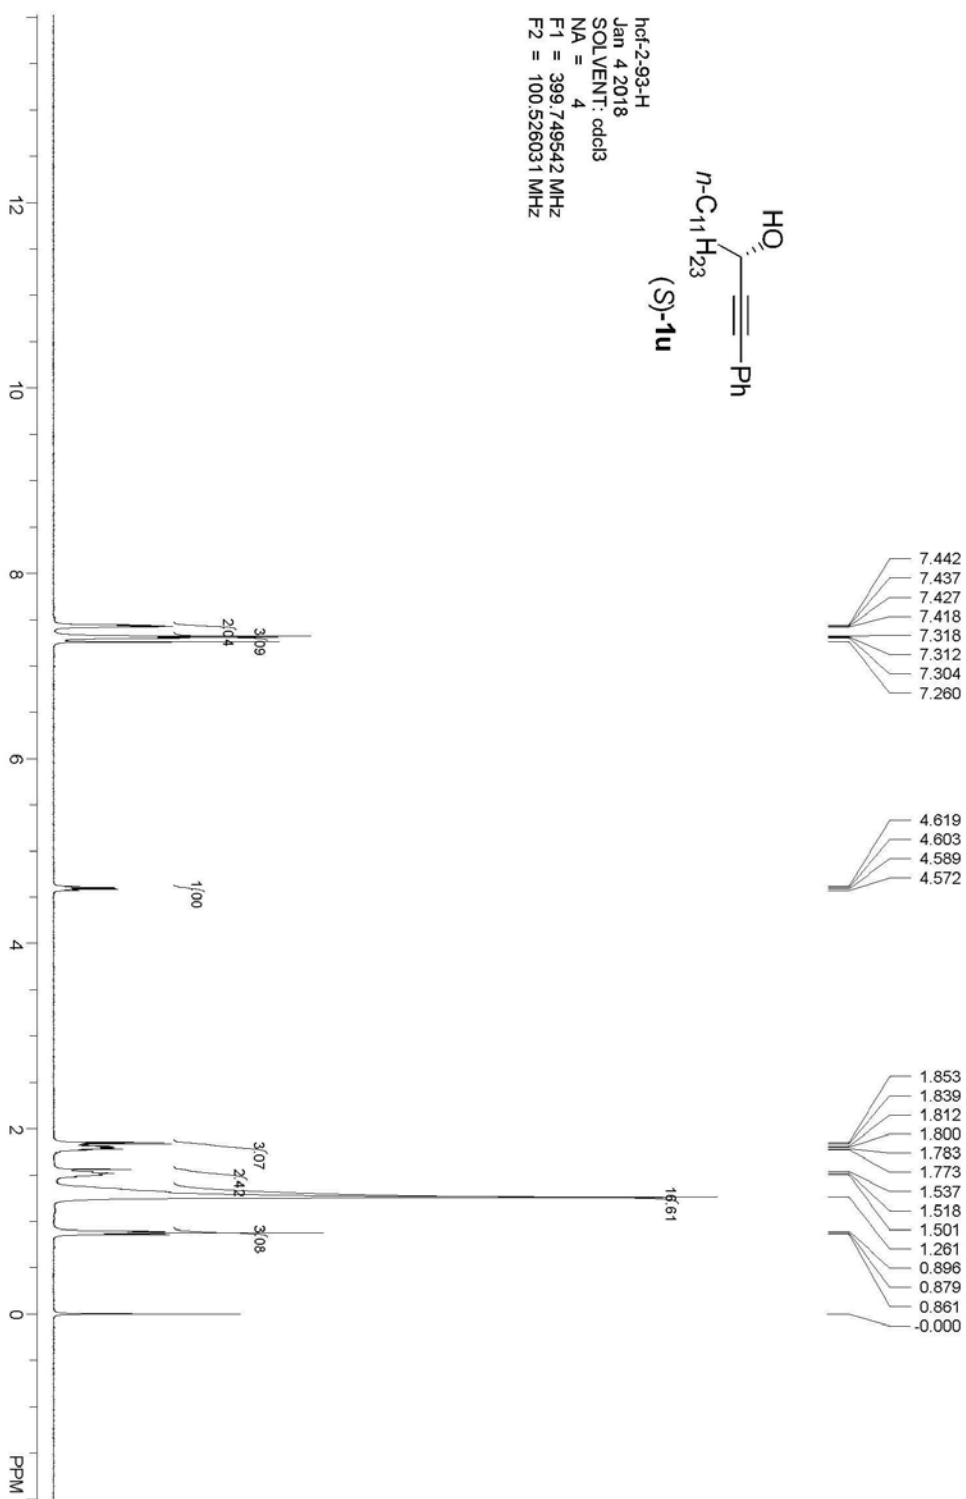

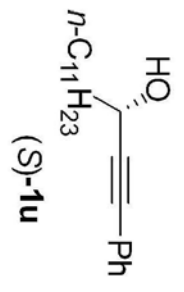

hd1-2-93-C  
Dec 16 2017  
SOLVENT: cdcl3  
NA = 512  
F1 = 100.527557 MHz  
F2 = 399.749146 MHz

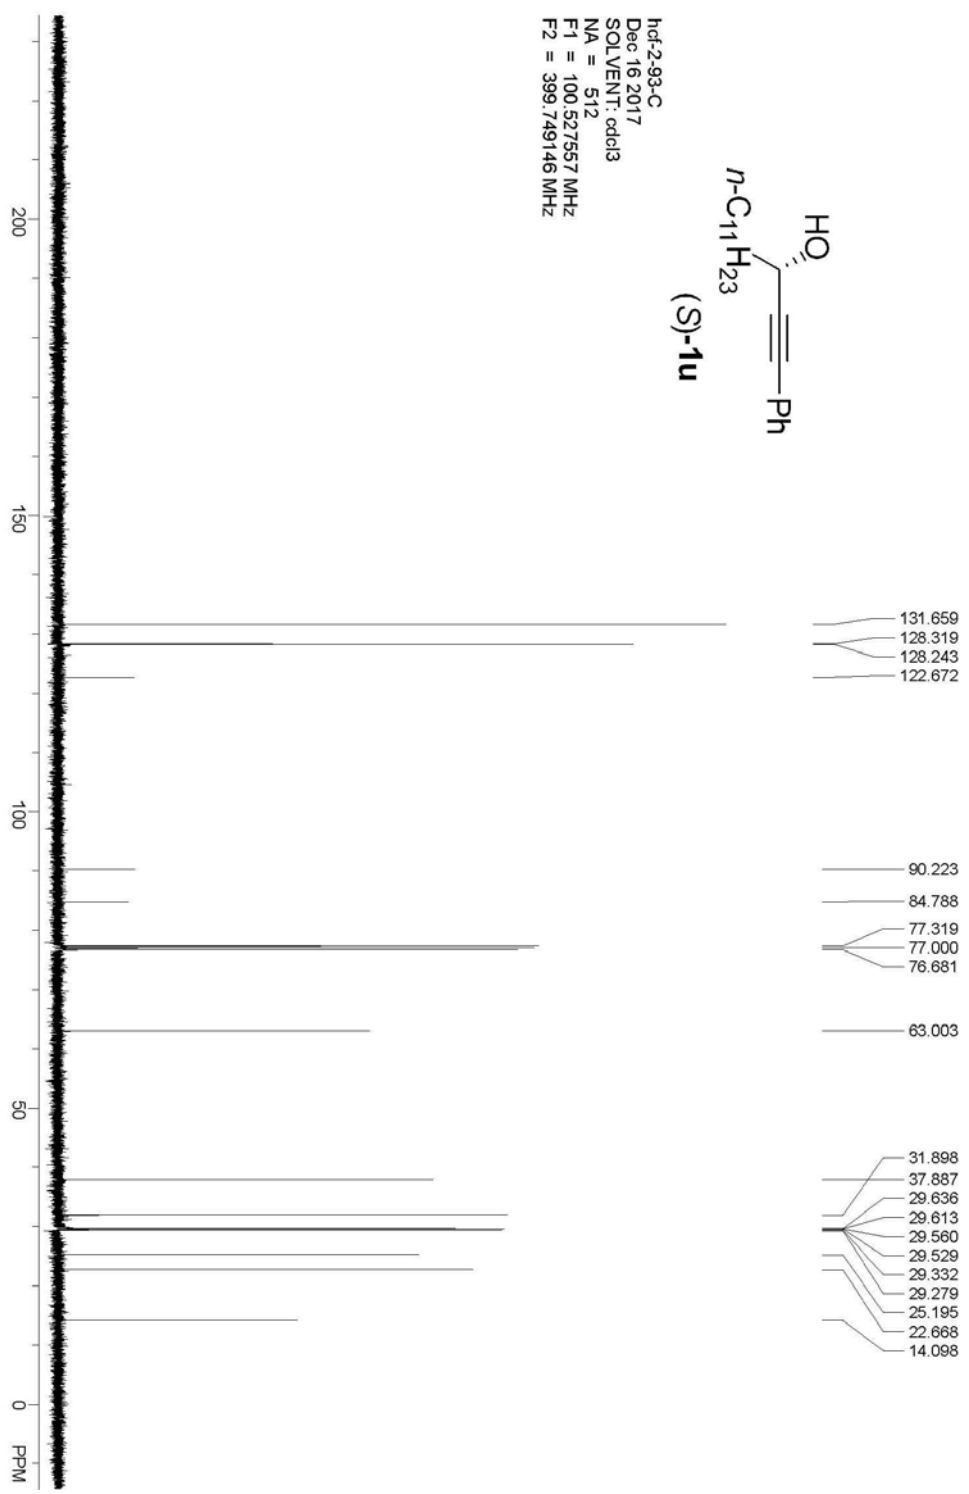

## hcf-2-71-pa-2-95-5-0.7-214

实验时间: 2017-12-21, 16:55:54  
谱图文件: D:\zhuguangjioug\hcf\20171221\hcf-2-71-pa-2-95-5-0.7-214.org

报告时间: 2017-12-21, 18:24:23

实验内容简介:

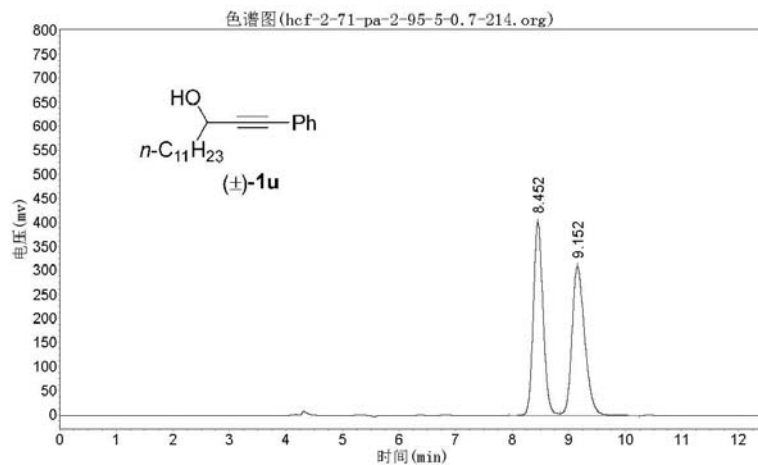

分析结果表

| 峰号 | 峰名 | 保留时间  | 峰高         | 峰面积         | 含量       |
|----|----|-------|------------|-------------|----------|
| 1  |    | 8.452 | 401822.000 | 4787561.500 | 49.8038  |
| 2  |    | 9.152 | 309477.500 | 4825286.500 | 50.1962  |
| 总计 |    |       | 711299.500 | 9612848.000 | 100.0000 |

## hcf-2-93-pa-2-95-5-0.7-214

实验时间: 2017-12-21, 17:13:49

报告时间: 2017-12-21, 18:25:50

谱图文件: D:\zhuguangjiang\hcf\20171221\hcf-2-93-pa-2-95-5-0.7-214.org

实验内容简介:

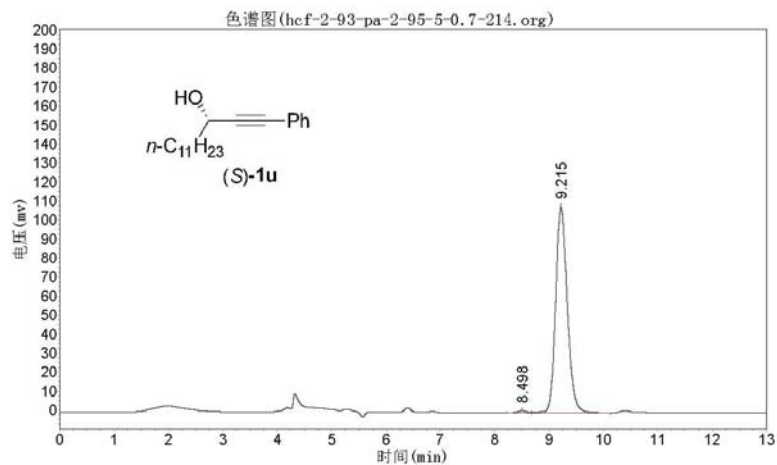

分析结果表

| 峰号 | 峰名 | 保留时间  | 峰高         | 峰面积         | 含量       |
|----|----|-------|------------|-------------|----------|
| 1  |    | 8.498 | 1178.903   | 14763.397   | 0.9050   |
| 2  |    | 9.215 | 108352.688 | 1616500.625 | 99.0950  |
| 总计 |    |       | 109531.590 | 1631264.022 | 100.0000 |

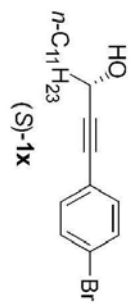

hcf-2-1114-H  
 Jan 15 2018  
 SOLVENT: cdcl3  
 NA = 4  
 F1 = 399.749542 MHz  
 F2 = 100.526031 MHz

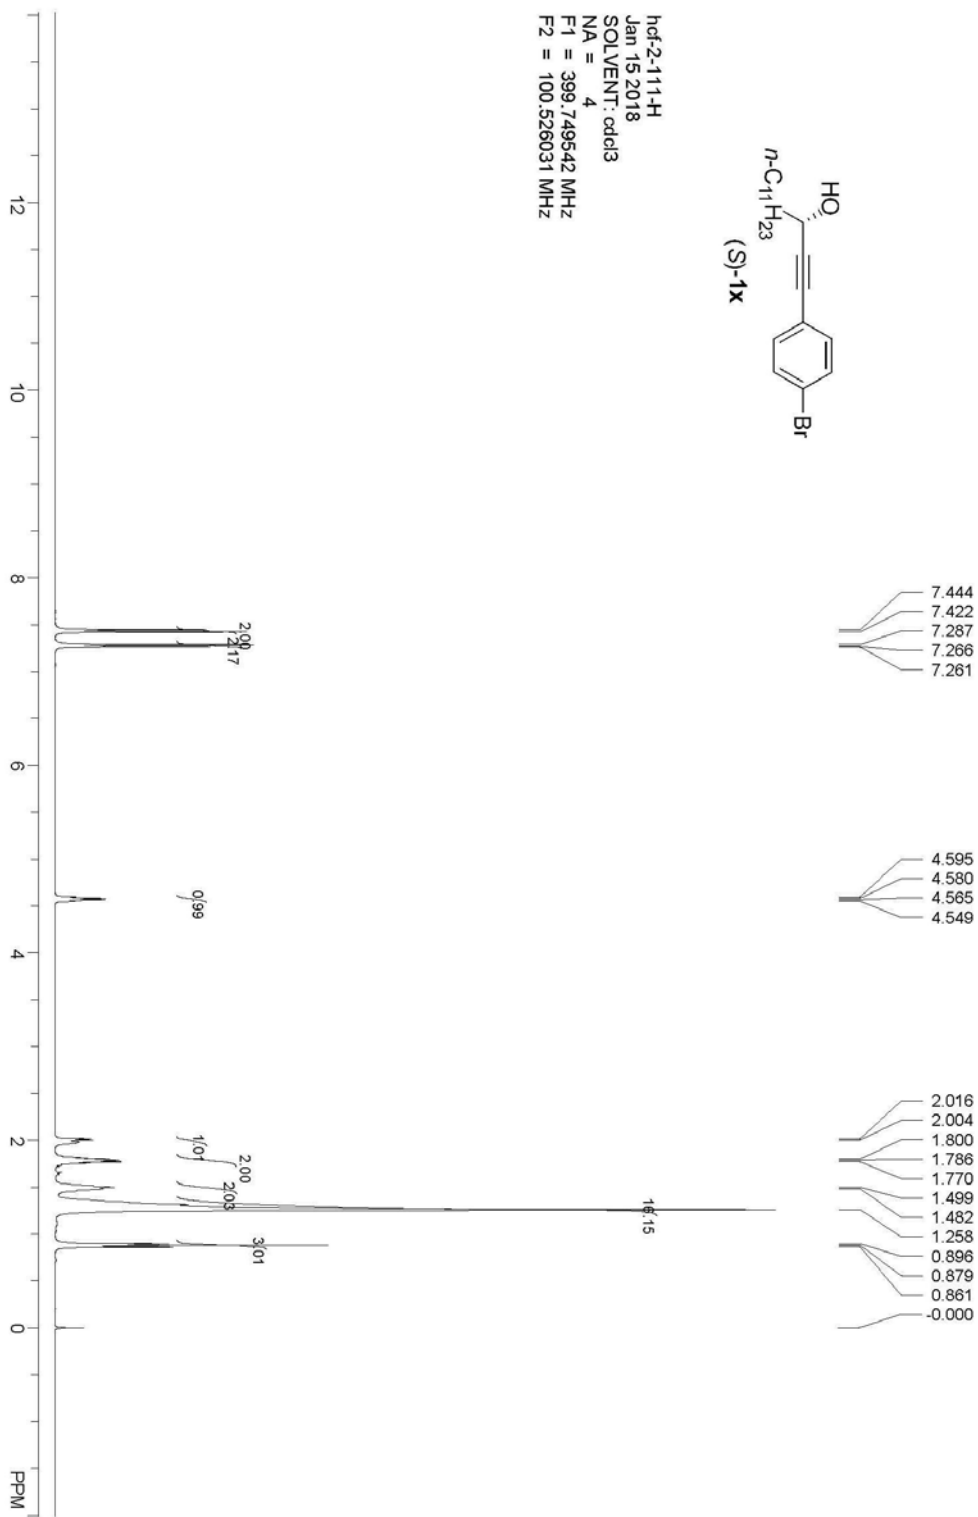

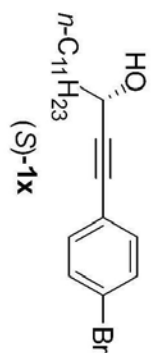

hcf-2-111-C  
 Jan 15 2018  
 SOLVENT: cdcl3  
 NA = 512  
 F1 = 100.527557 MHz  
 F2 = 399.749146 MHz

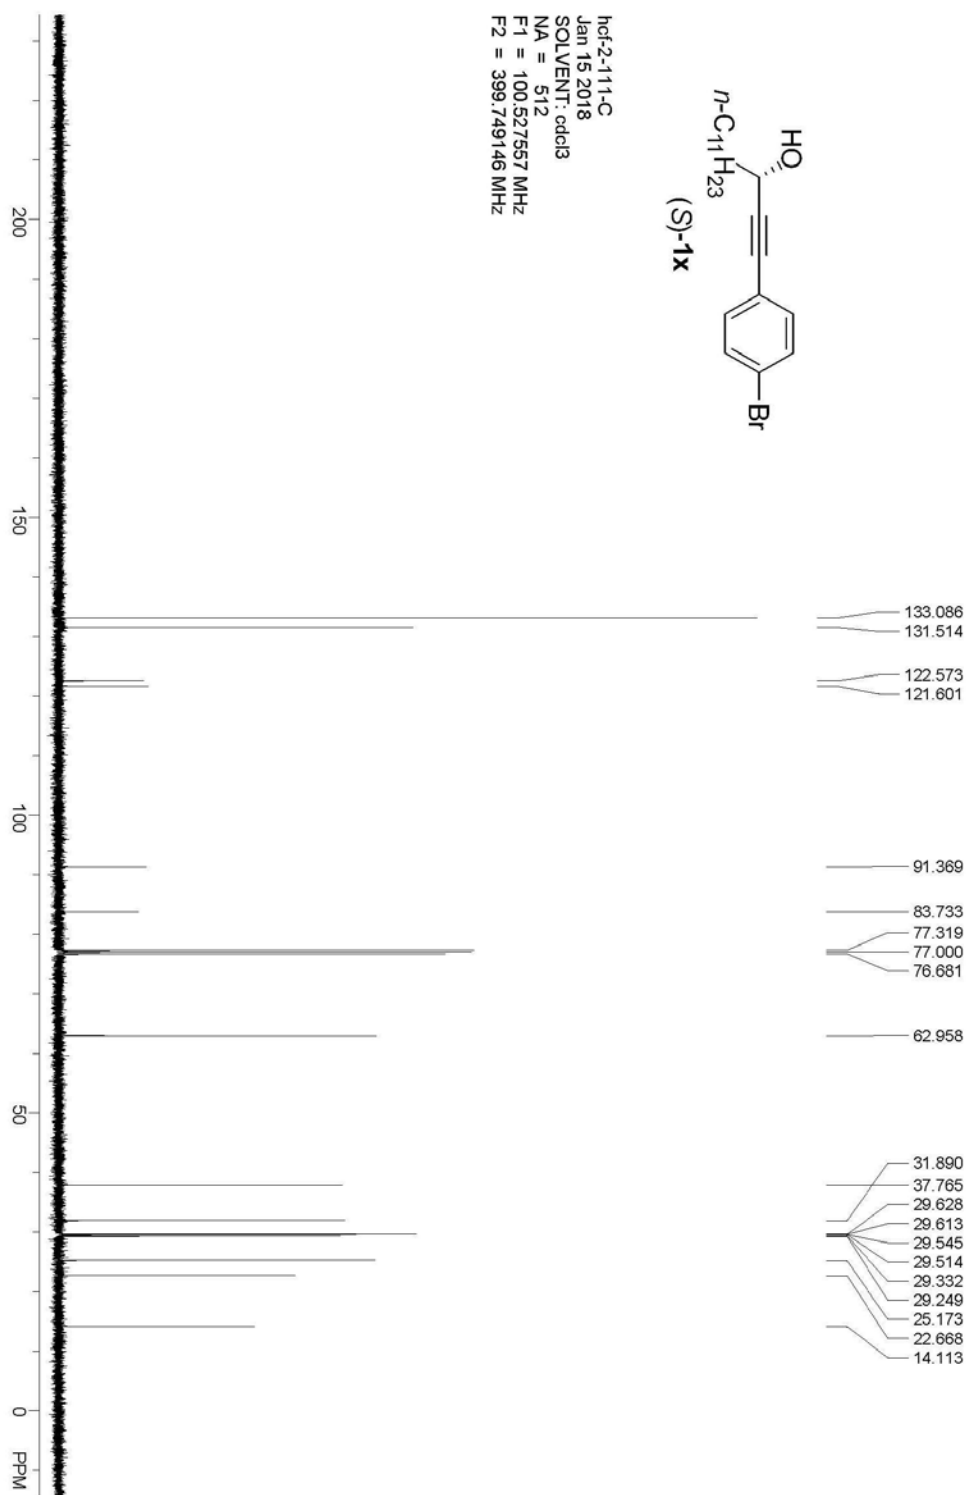

## hcf-2-109-pa-2-100-1-0.7-214

实验时间: 2018-01-31, 15:44:41  
谱图文件: D:\zhuguangjiang\hcf\20180131\hcf-2-109-pa-2-100-1-0.7-214.org

报告时间: 2018-01-31, 16:49:52

实验内容简介:

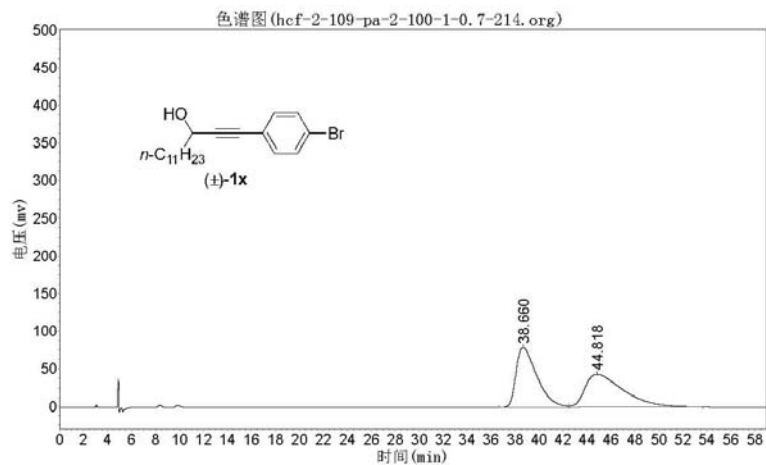

分析结果表

| 峰号 | 峰名 | 保留时间   | 峰高         | 峰面积          | 含量       |
|----|----|--------|------------|--------------|----------|
| 1  |    | 38.660 | 79432.055  | 9596410.000  | 49.7081  |
| 2  |    | 44.818 | 43692.844  | 9709120.000  | 50.2919  |
| 总计 |    |        | 123124.898 | 19305530.000 | 100.0000 |



## hcf-2-111-pa-2-100-1-0.7-214

实验时间: 2018-01-31, 14:40:55  
谱图文件: D:\zhuguangjiang\hcf\20180131\hcf-2-111-pa-2-100-1-0.7-214.org

报告时间: 2018-01-31, 16:51:26

实验内容简介:

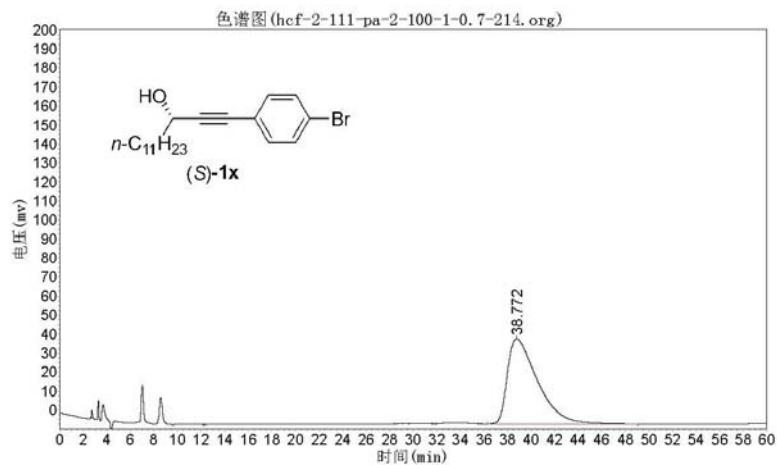

分析结果表

| 峰号 | 峰名 | 保留时间   | 峰高        | 峰面积         | 含量       |
|----|----|--------|-----------|-------------|----------|
| 1  |    | 38.772 | 44773.922 | 7916097.000 | 100.0000 |
| 总计 |    |        | 44773.922 | 7916097.000 | 100.0000 |

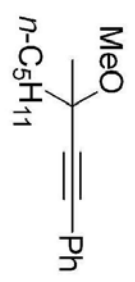

**3**

hcf-2-148-H  
 Mar 7 2018  
 SOLVENT: cdcl3  
 NA = 4  
 F1 = 399.749542 MHz  
 F2 = 100.526031 MHz

7.445  
 7.436  
 7.427  
 7.420  
 7.307  
 7.299  
 7.290  
 7.251

3.419  
 1.782  
 1.770  
 1.749  
 1.740  
 1.722  
 1.708  
 1.676  
 1.568  
 1.538  
 1.520  
 1.508  
 1.484  
 1.342  
 1.334  
 1.324  
 0.926  
 0.908  
 0.892  
 0.000

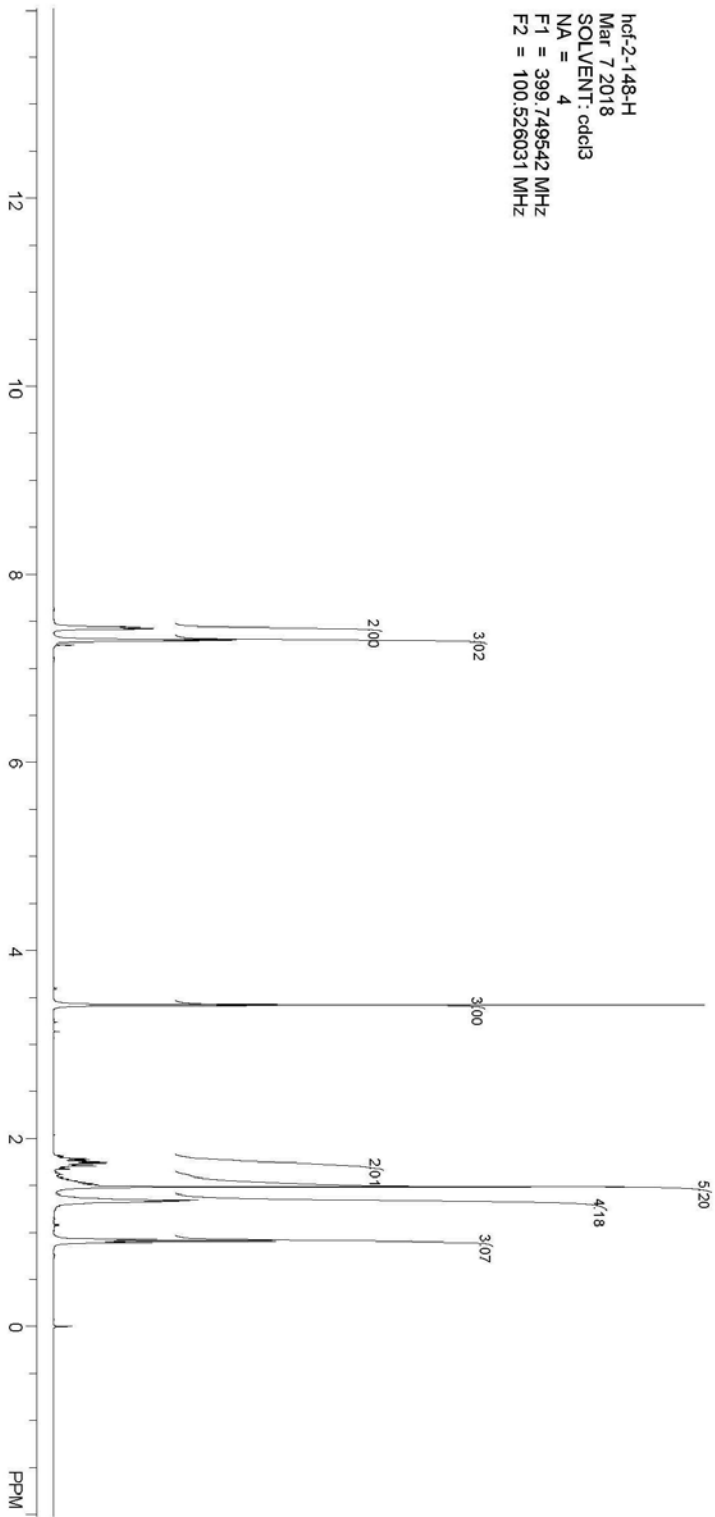

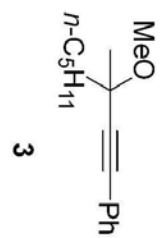

hmf-2-148-C  
 Mar 7 2018  
 SOLVENT: cdd3  
 NA = 512  
 F1 = 100.527557 MHz  
 F2 = 399.749146 MHz

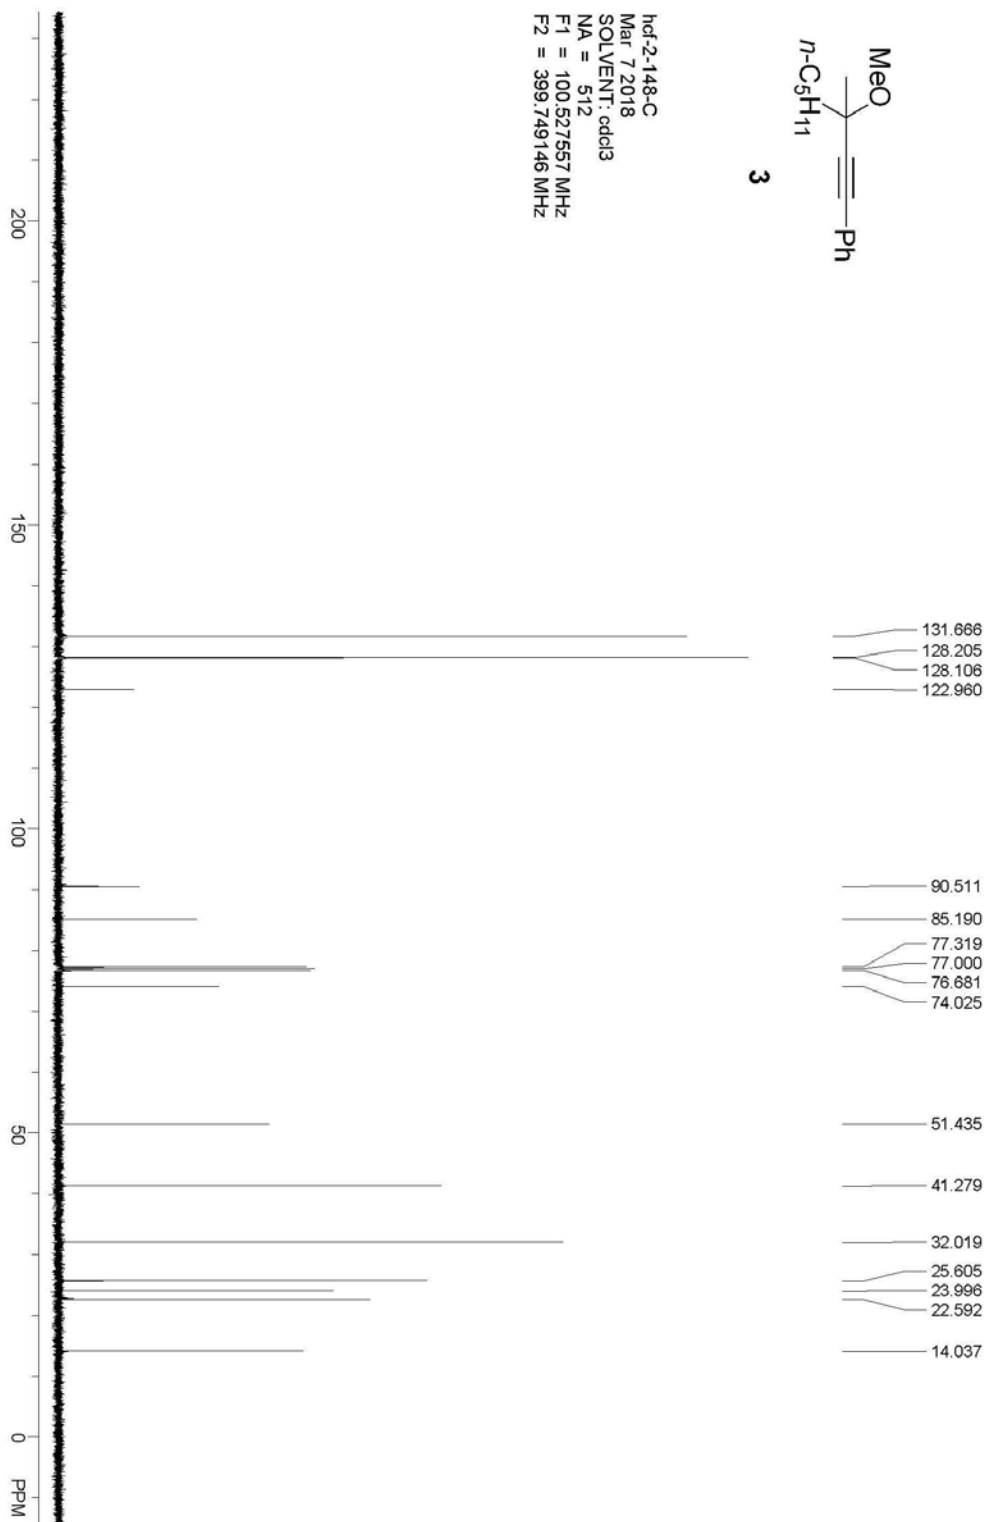

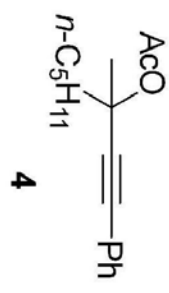

hc-f-2-146-H  
 Mar 7 2018  
 SOLVENT: cddcl3  
 NA = 4  
 F1 = 399.749542 MHz  
 F2 = 100.526031 MHz

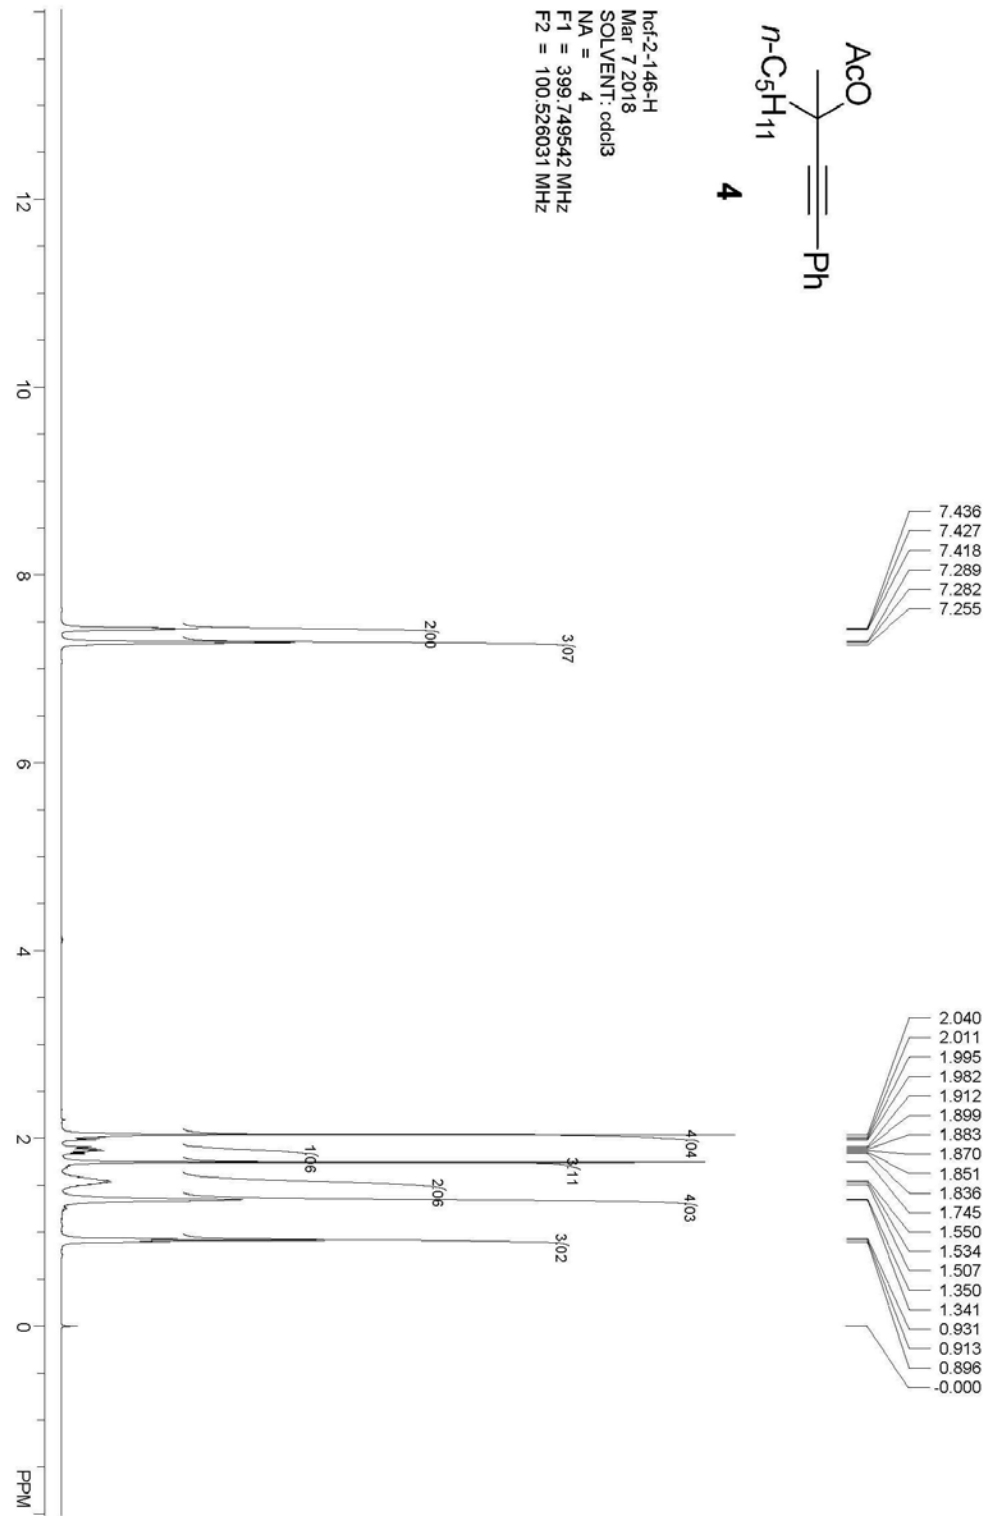

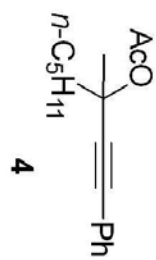

hdf-2-146-C  
 Mar 7 2018  
 SOLVENT: cdcl3  
 NA = 512  
 F1 = 100.527557 MHz  
 F2 = 399.749146 MHz

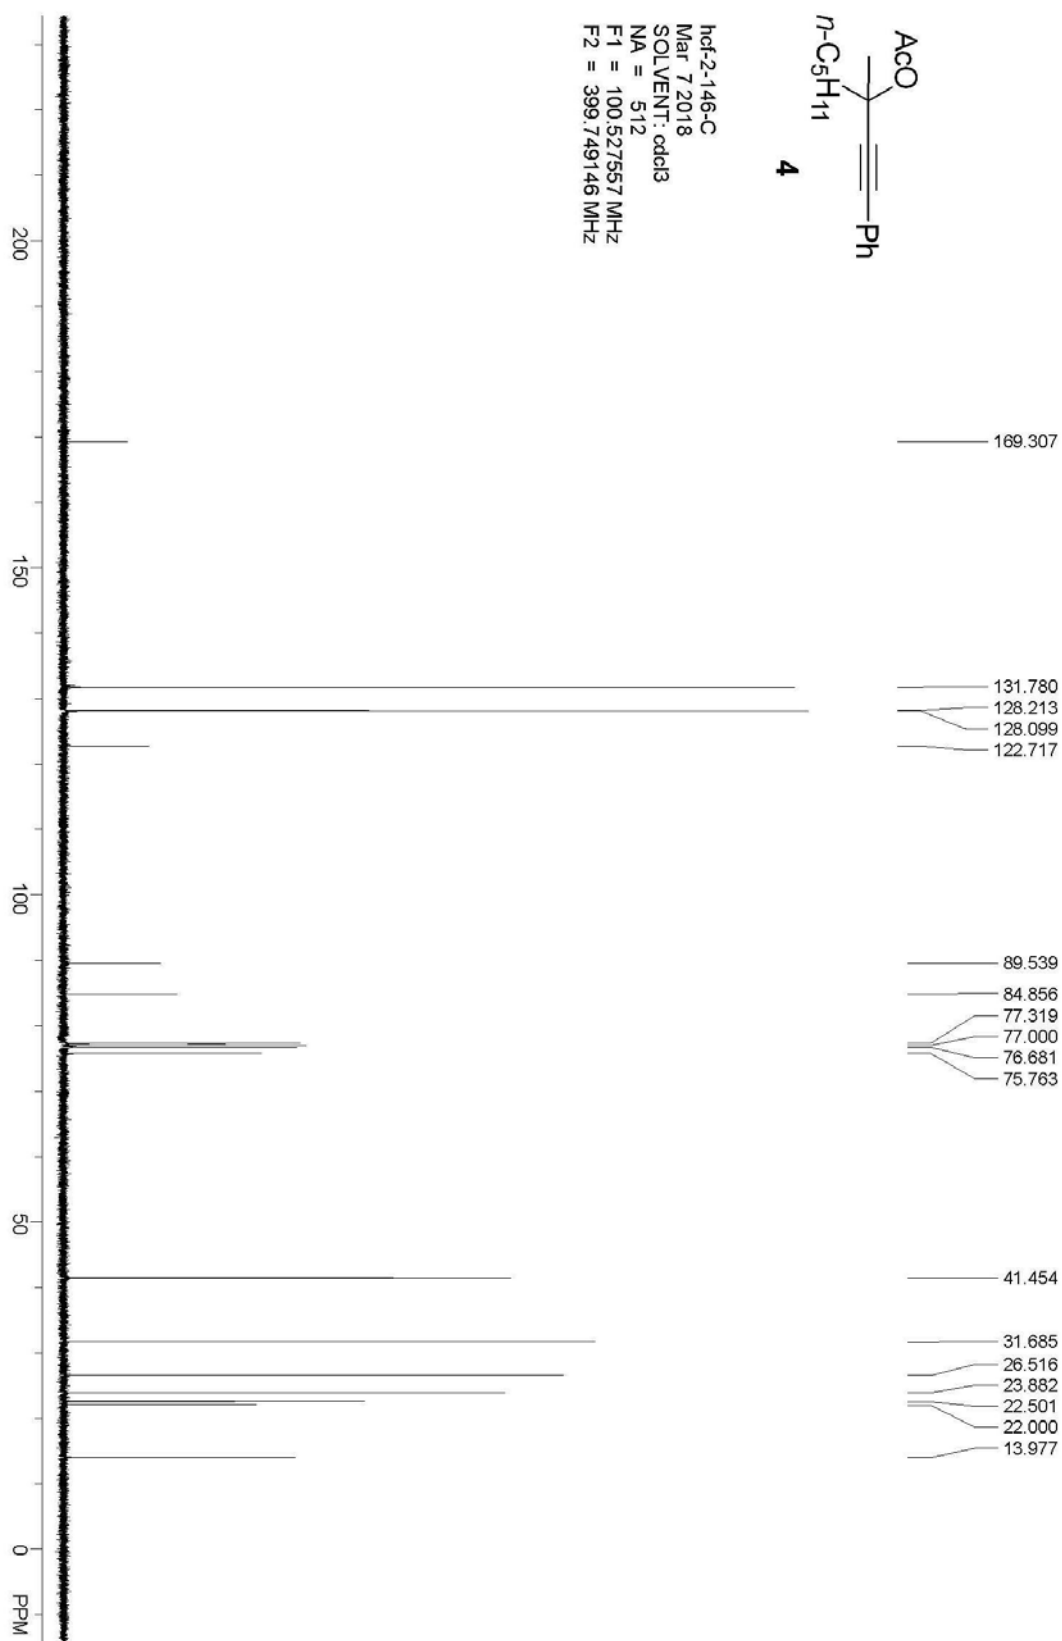

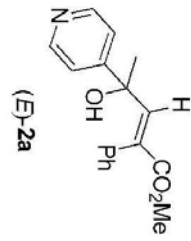

hcf-1-197-H  
 Oct 2 2017  
 SOLVENT: CDCl3  
 NA = 24  
 F1 = 399.722809 MHz  
 F2 = 100.519203 MHz

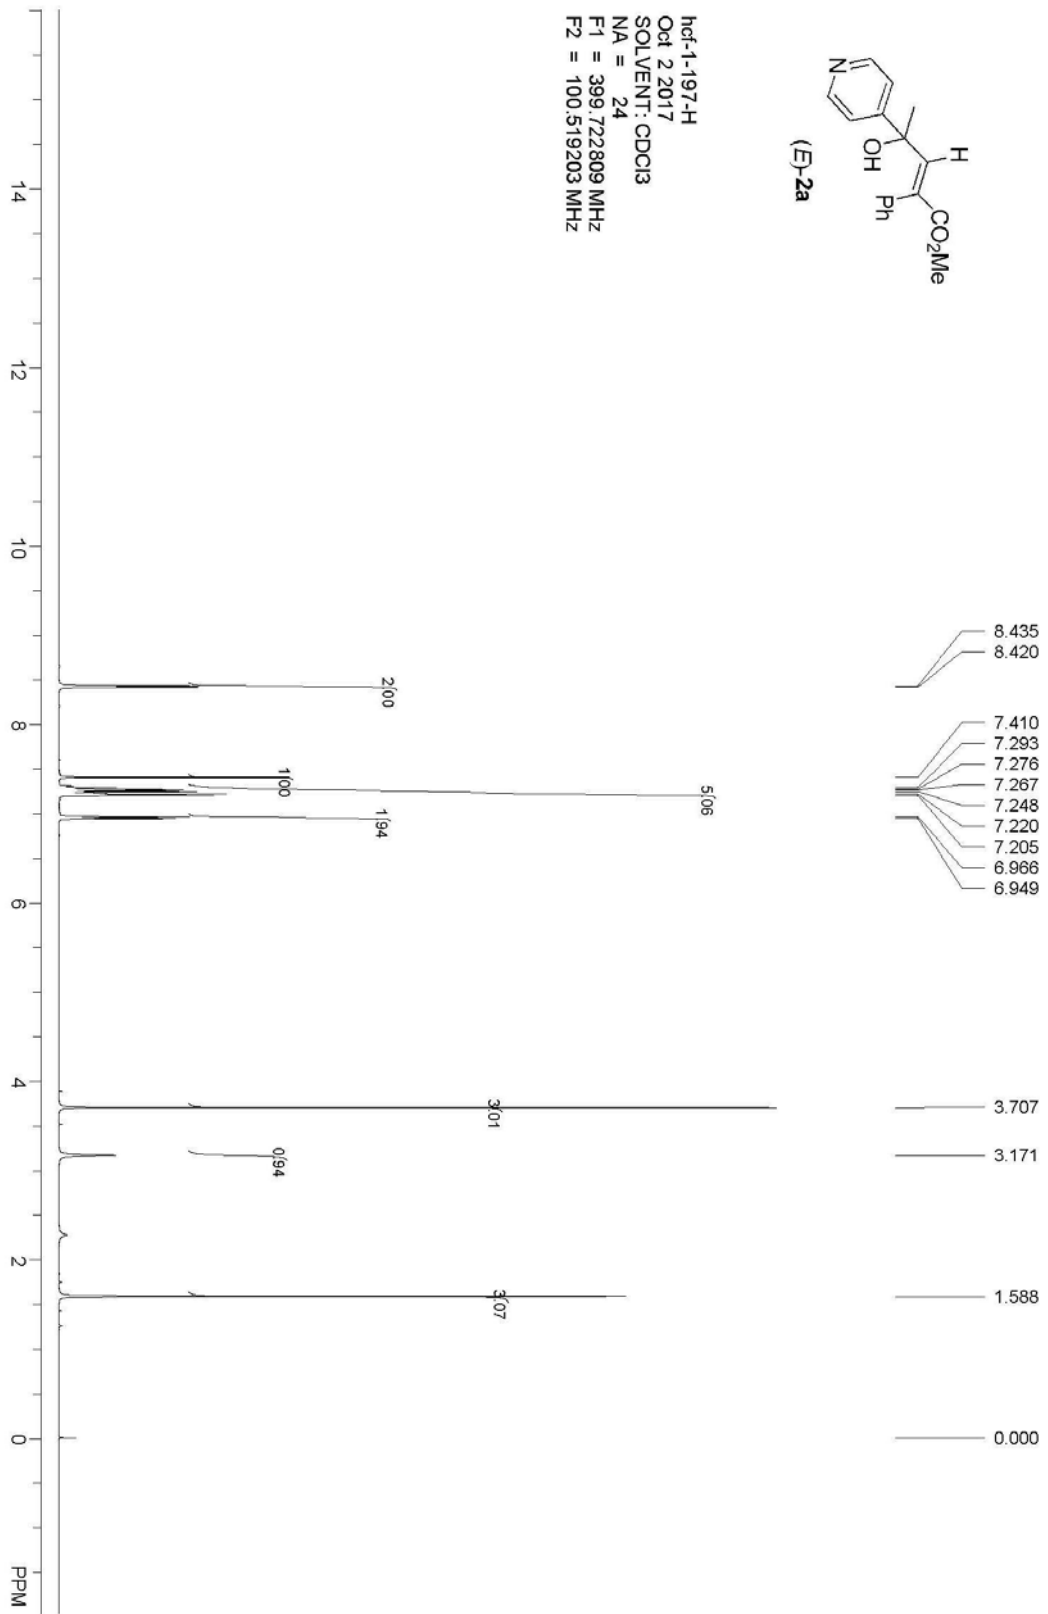

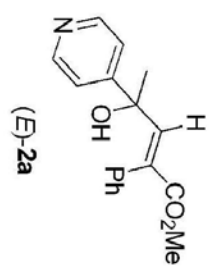

hcd-1-197-C  
Oct 2 2017  
SOLVENT: cdcl3  
NA = 32  
F1 = 100.520737 MHz  
F2 = 399.722015 MHz

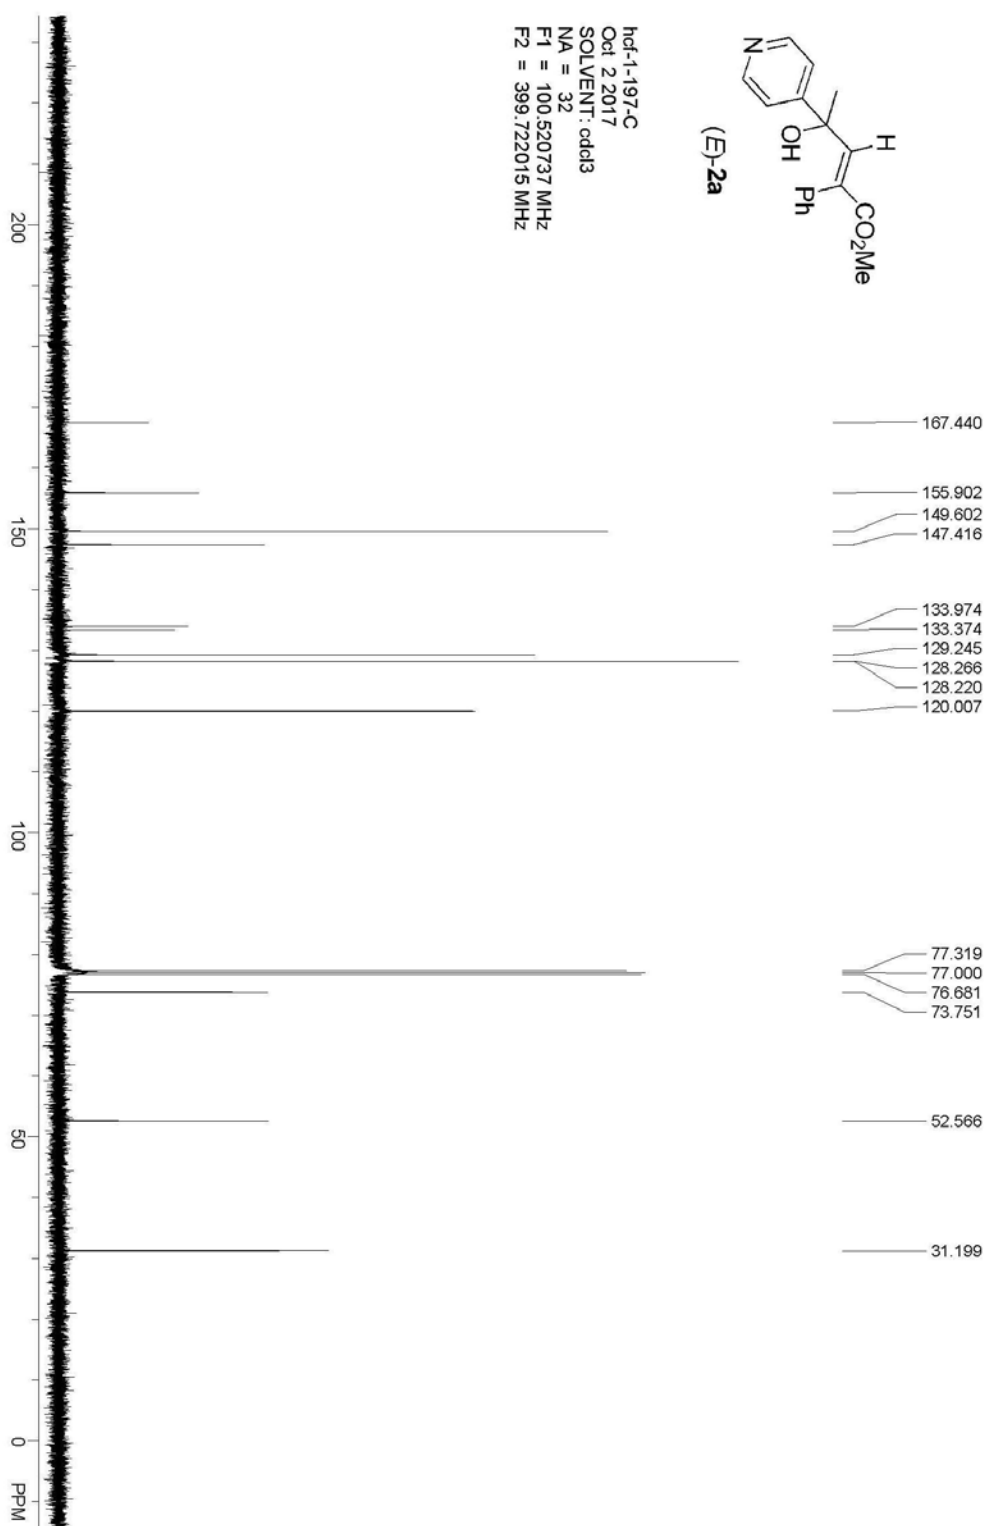

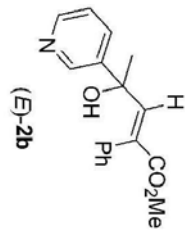

hcf-1-198-H  
 Sep 22 2017  
 SOLVENT: cdcl3  
 NA = 8  
 F1 = 399.749542 MHz  
 F2 = 100.526031 MHz

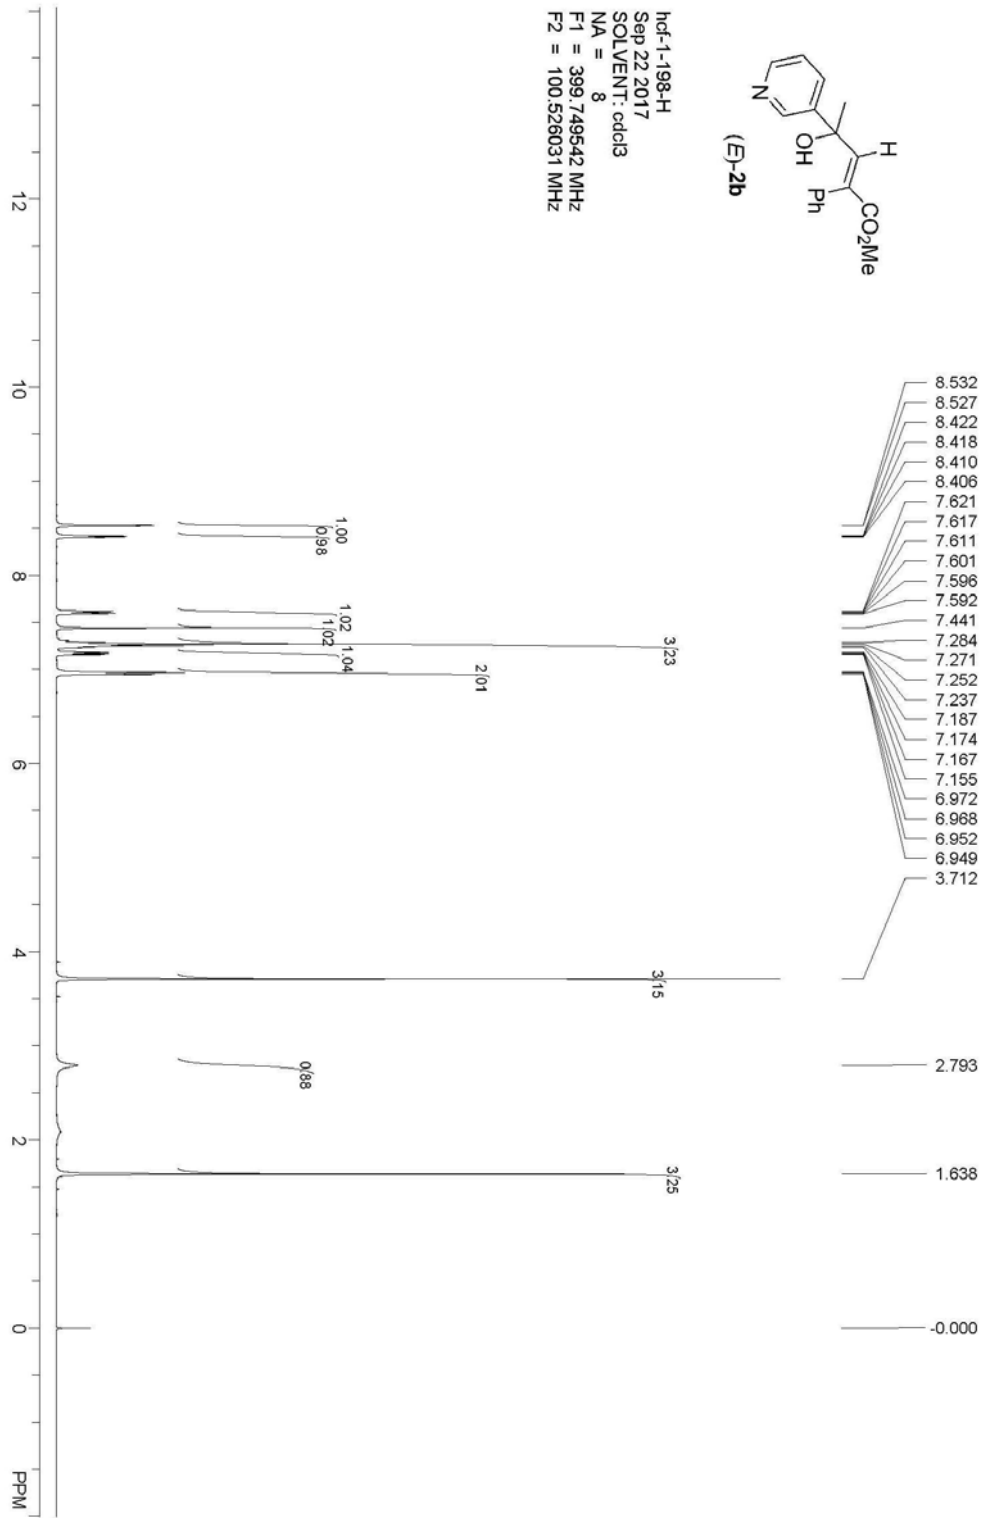



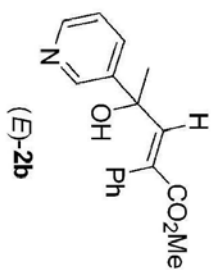

hcf-1-198-C  
 Sep 22 2017  
 SOLVENT: cdcl3  
 NA = 1000  
 F1 = 100.527557 MHz  
 F2 = 399.749146 MHz

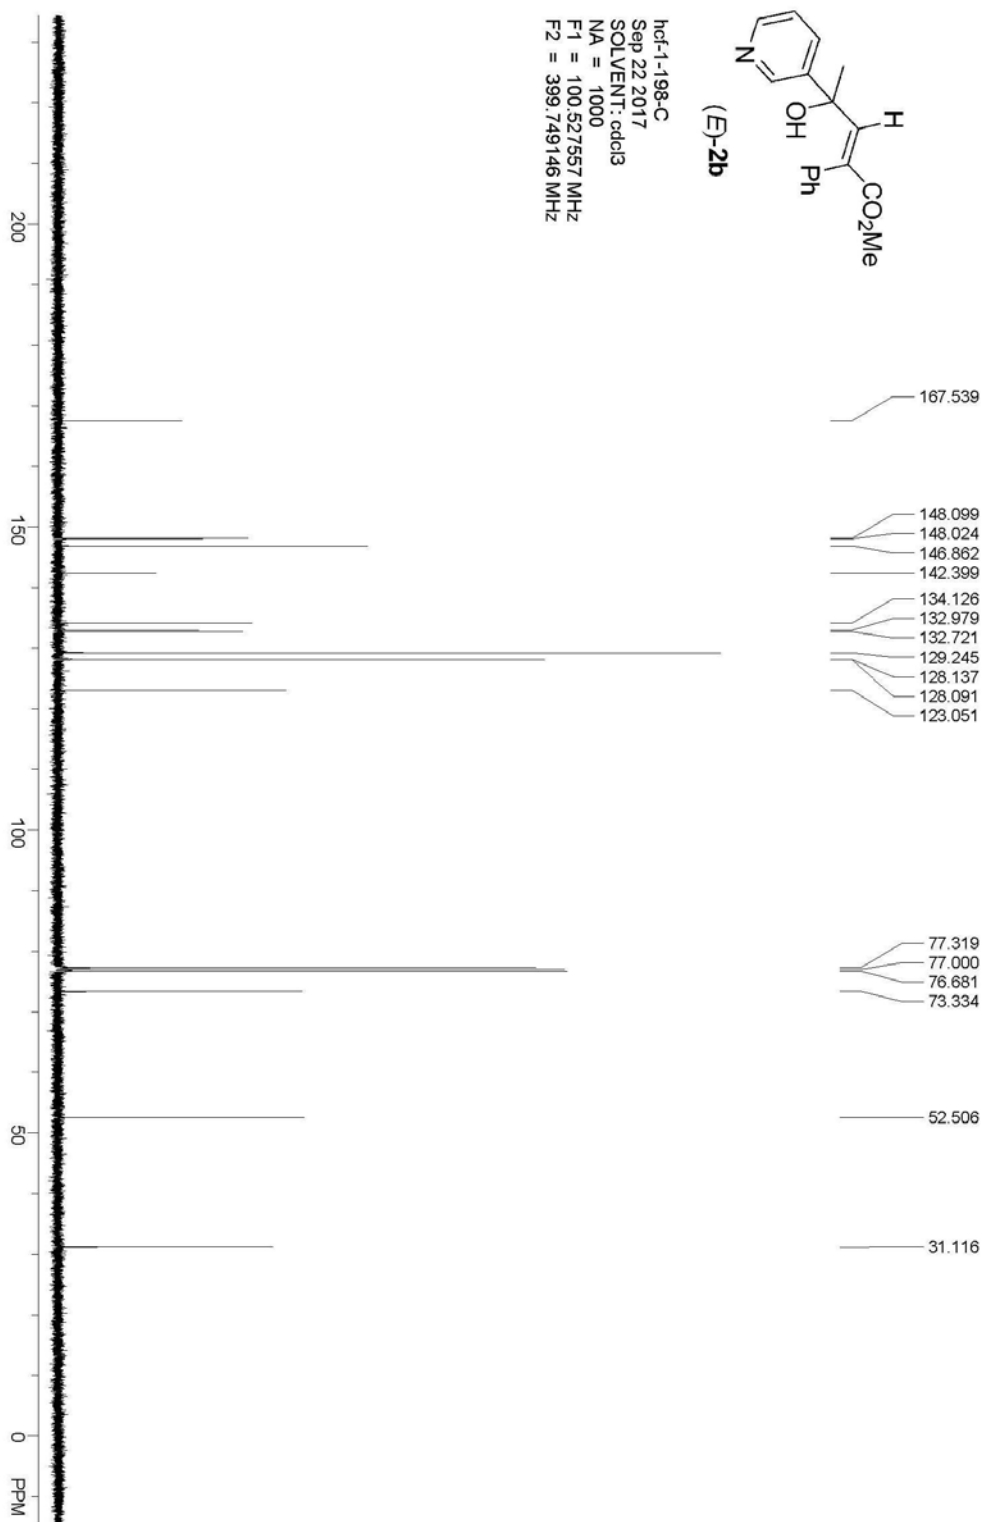

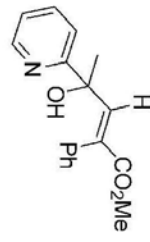

(E)-2c

hcf-2-2-H  
 Oct 18 2017  
 SOLVENT: cdcl3  
 NA = 8  
 F1 = 399.749542 MHz  
 F2 = 100.526031 MHz

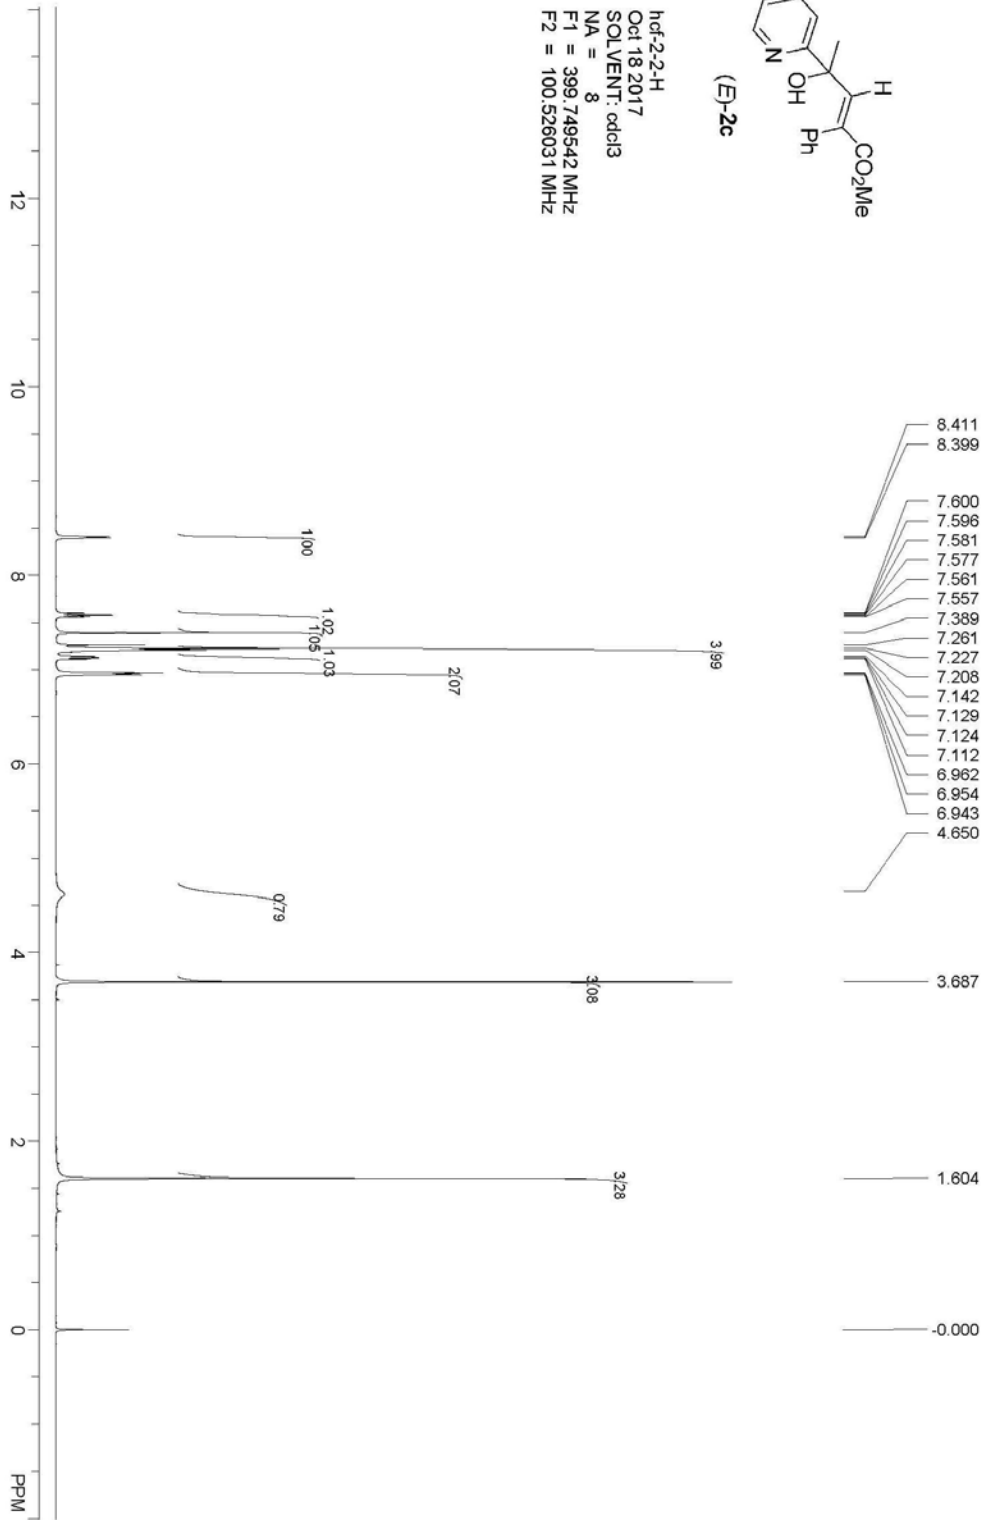

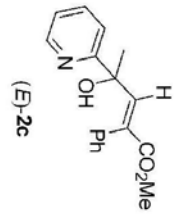

hof-2-2-C  
 Sep 30 2017  
 SOLVENT: CDCl3  
 NA = 1024  
 F1 = 100.605225 MHz  
 F2 = 1.000000 MHz

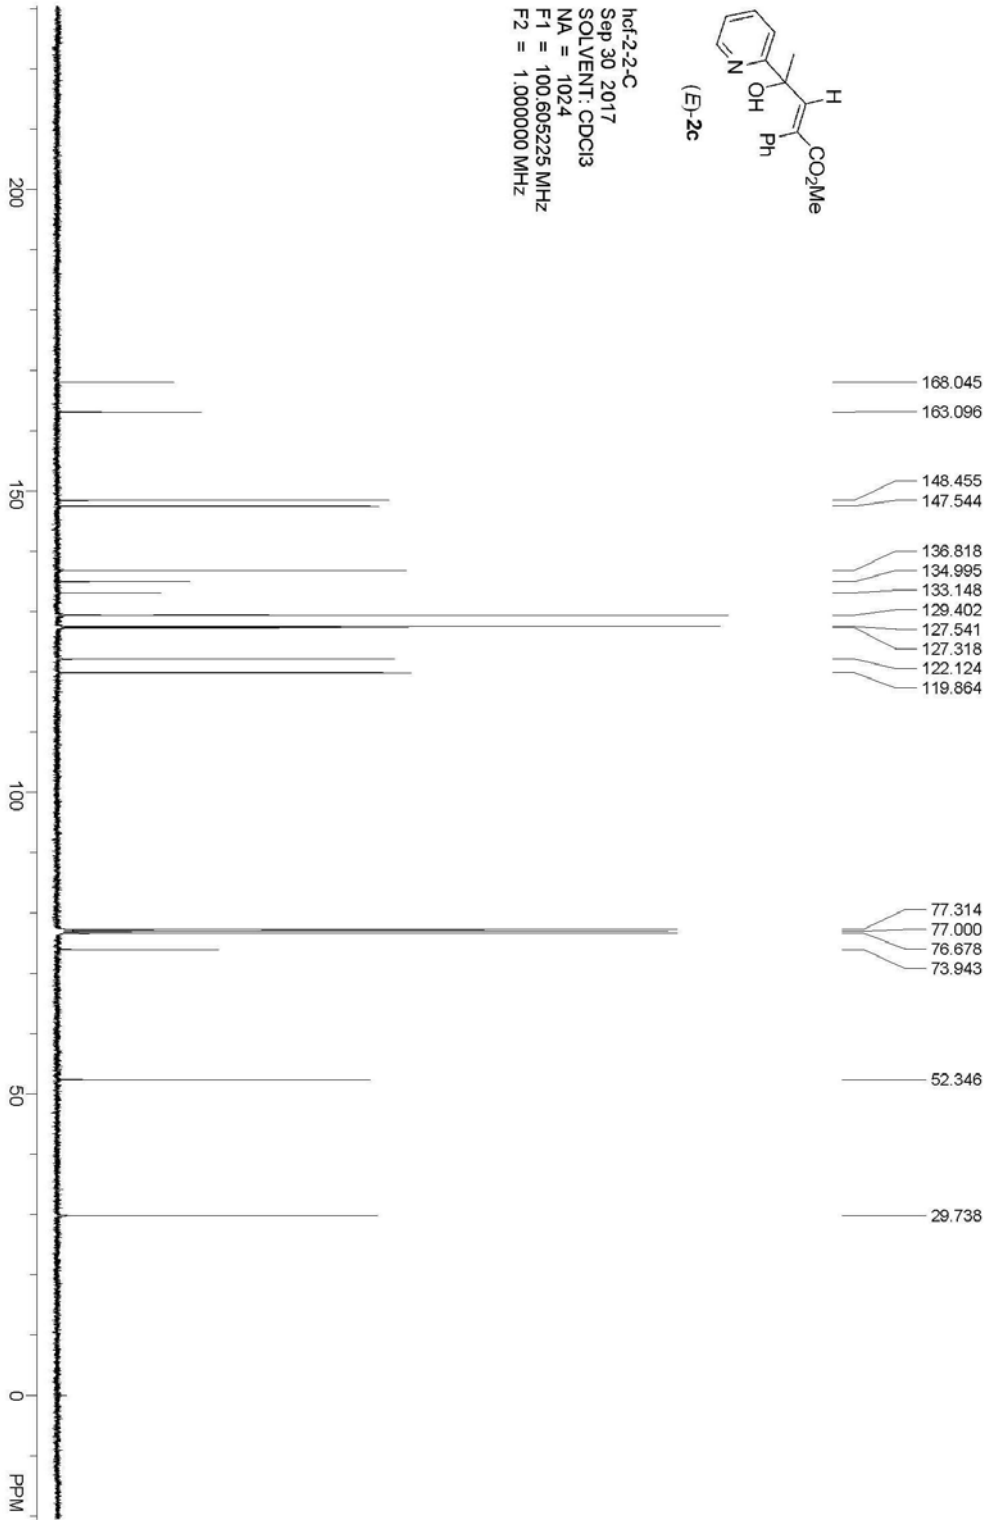

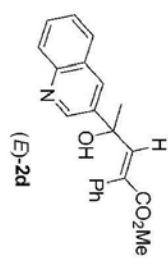

hcf-2-3-H  
 Oct 31 2017  
 SOLVENT: cdcl3  
 NA = 8  
 F1 = 399.749542 MHz  
 F2 = 100.526031 MHz

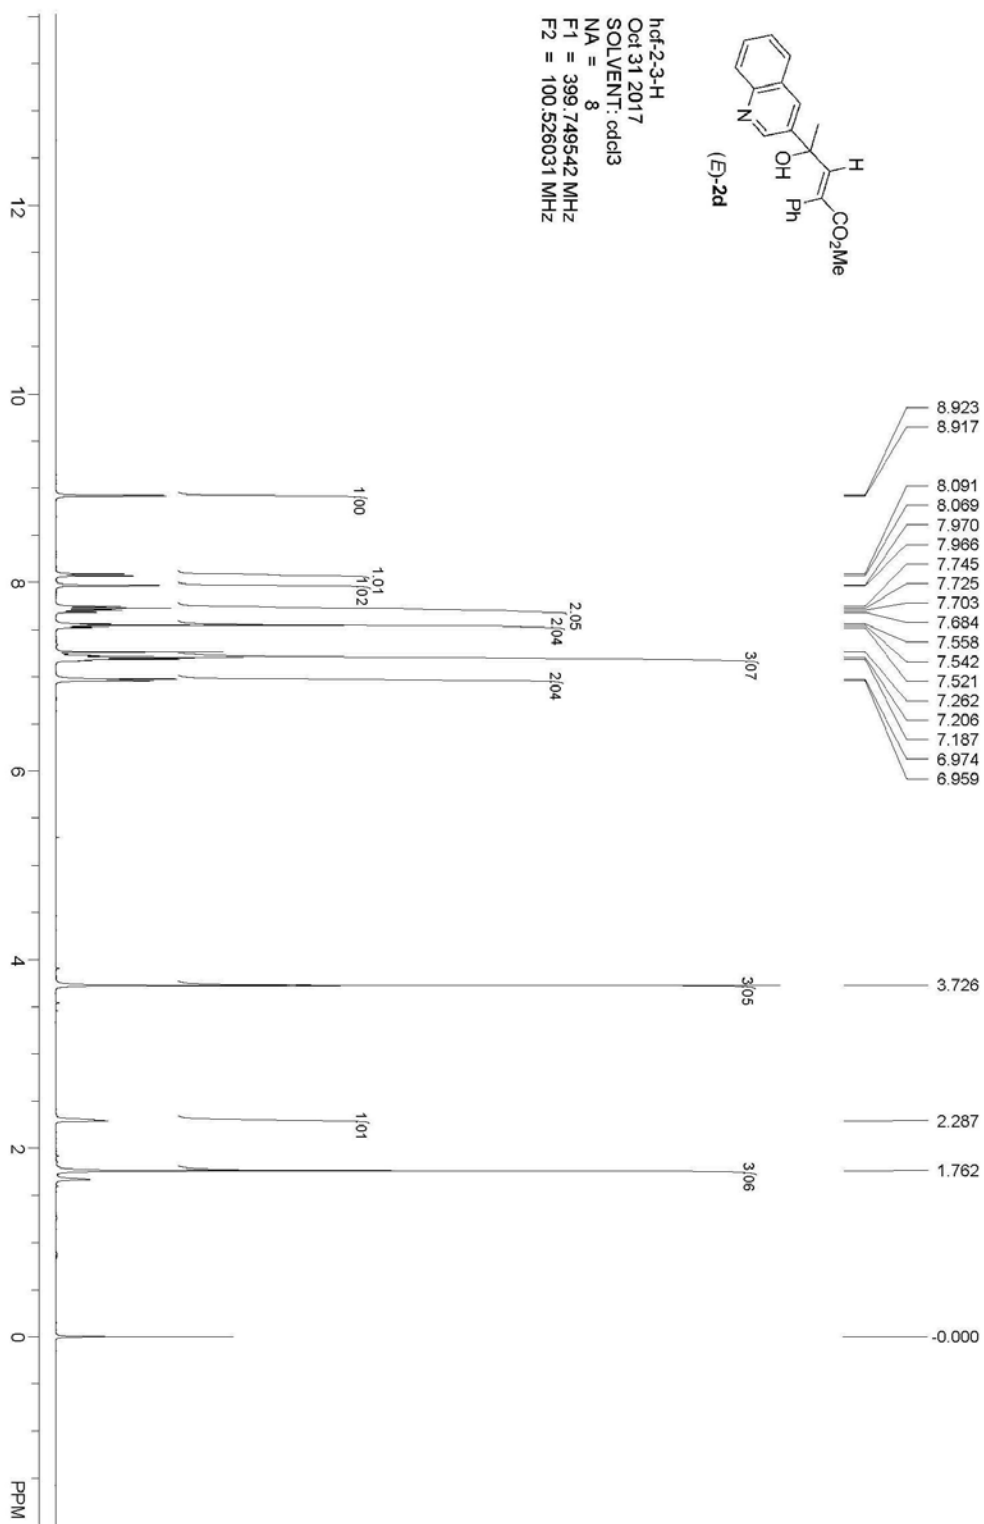

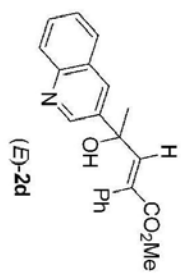

hof-2-3-C  
 Sep 30 2017  
 SOLVENT: CDCl3  
 NA = 512  
 F1 = 100.605225 MHz  
 F2 = 1.000000 MHz

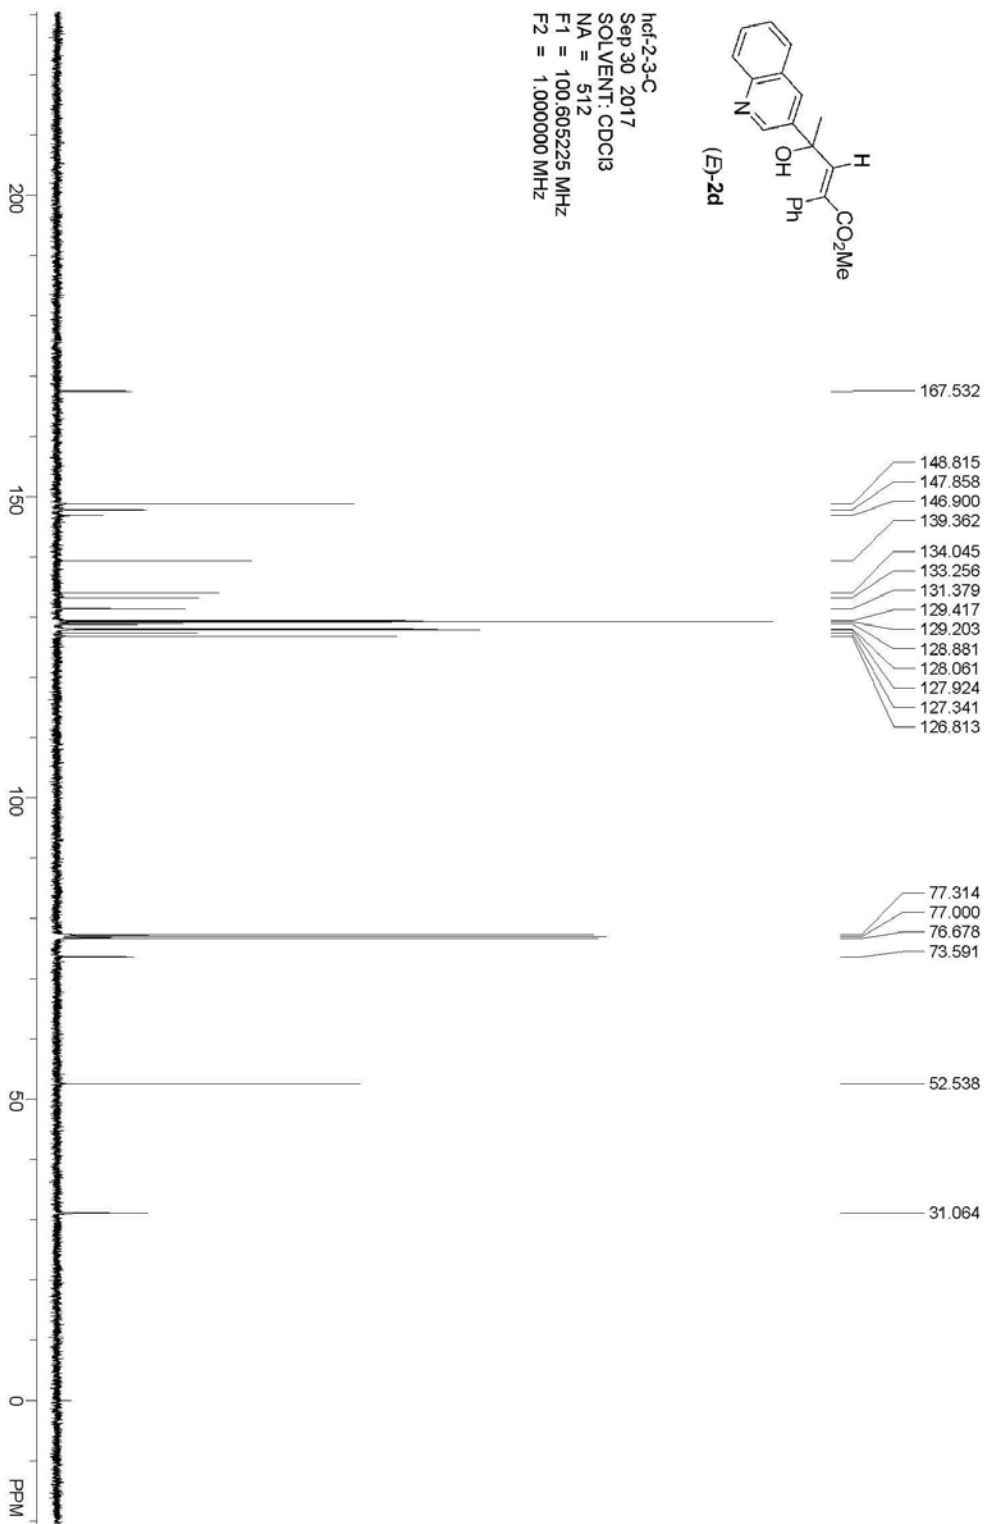

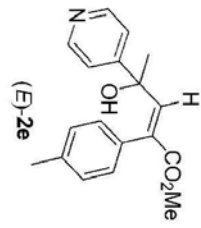

hnf-2-15-H  
 Oct 09 2017  
 SOLVENT: CDCl3  
 NA = 16  
 F1 = 400.102386 MHz  
 F2 = 1.000000 MHz

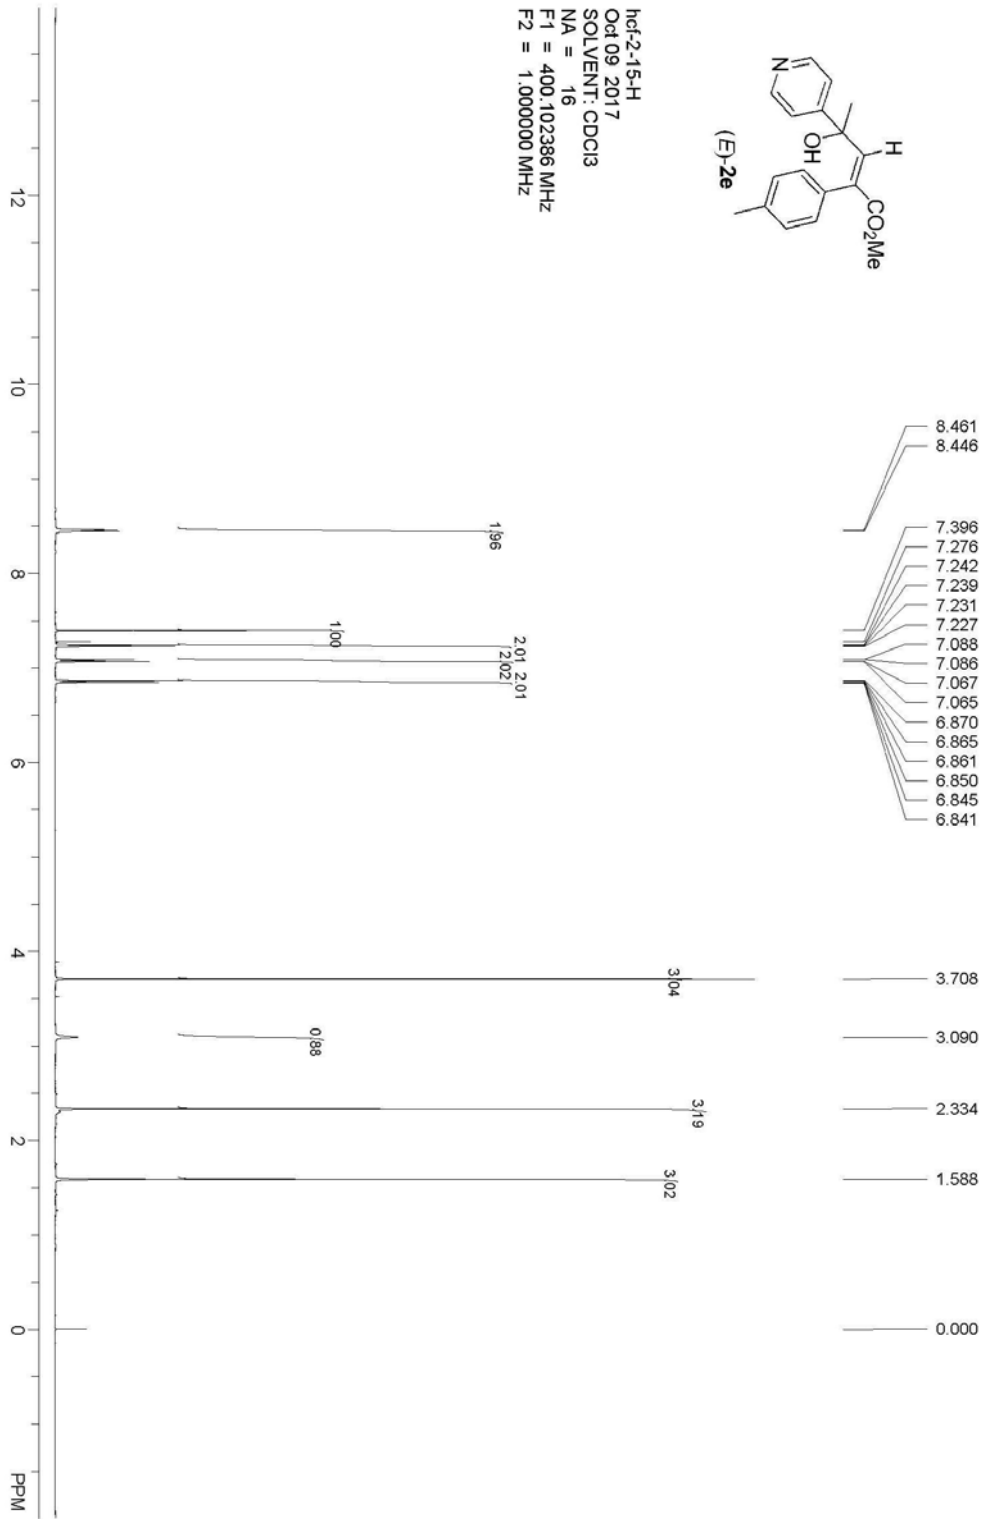

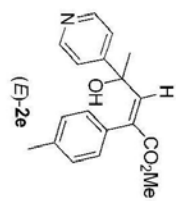

hnf-2-15-C  
 Oct 09 2017  
 SOLVENT: CDCl3  
 NA = 512  
 F1 = 100.615791 MHz  
 F2 = 1.000000 MHz

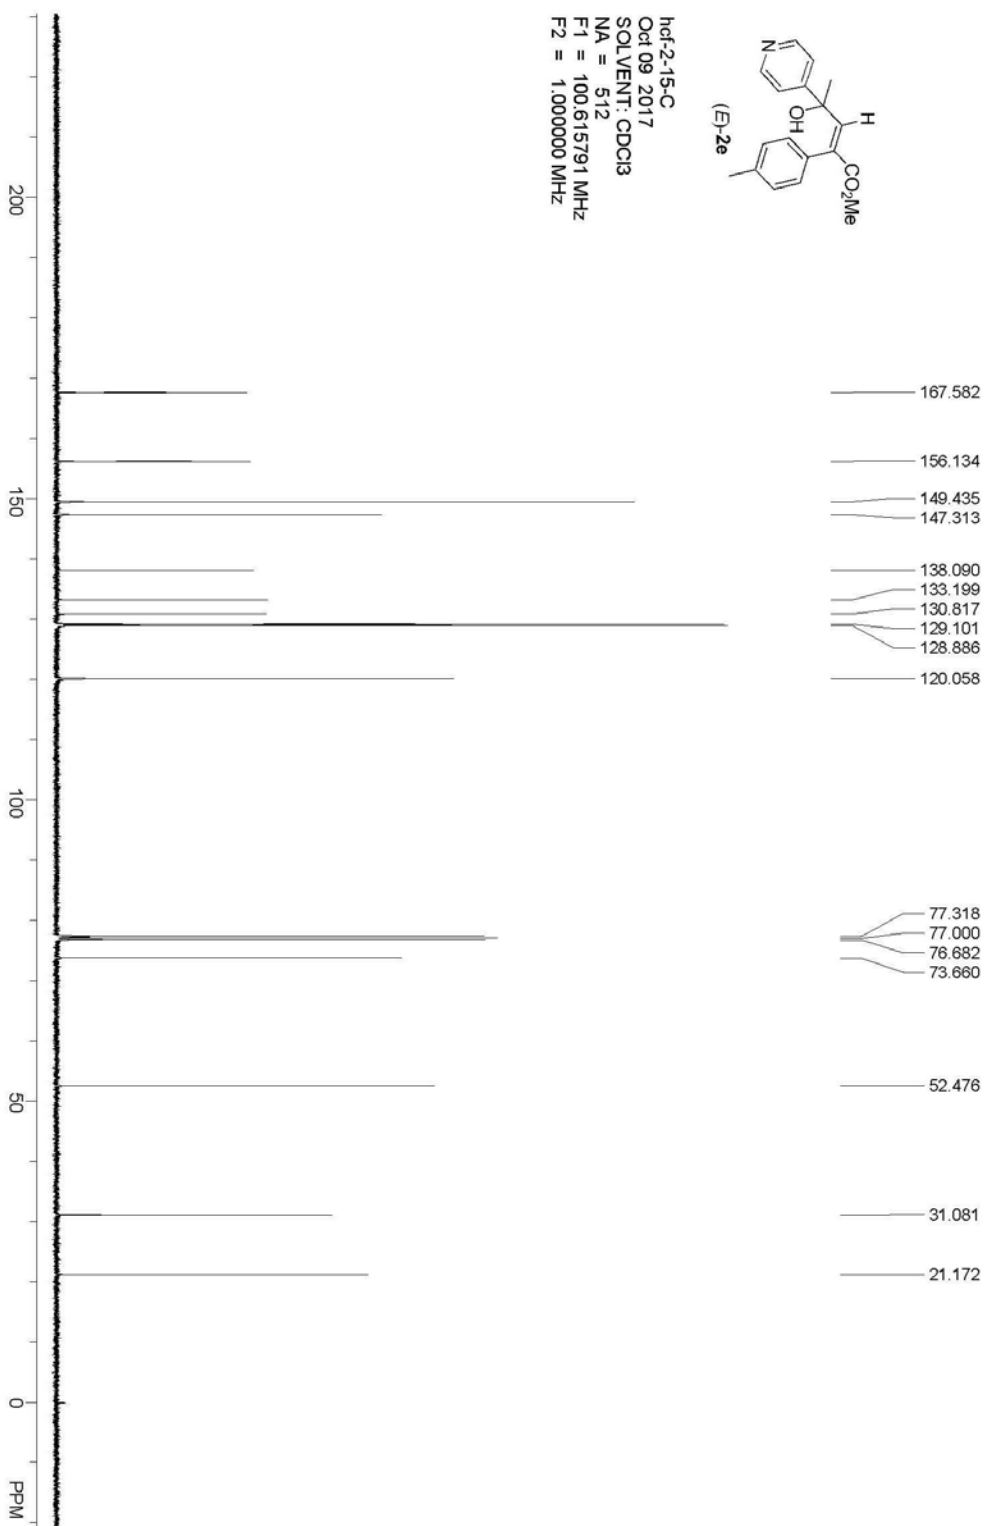

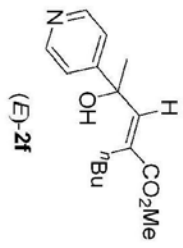

hnf-2-4-H  
 Oct 31 2017  
 SOLVENT: oddl3  
 NA = 8  
 F1 = 399.749542 MHz  
 F2 = 100.526031 MHz

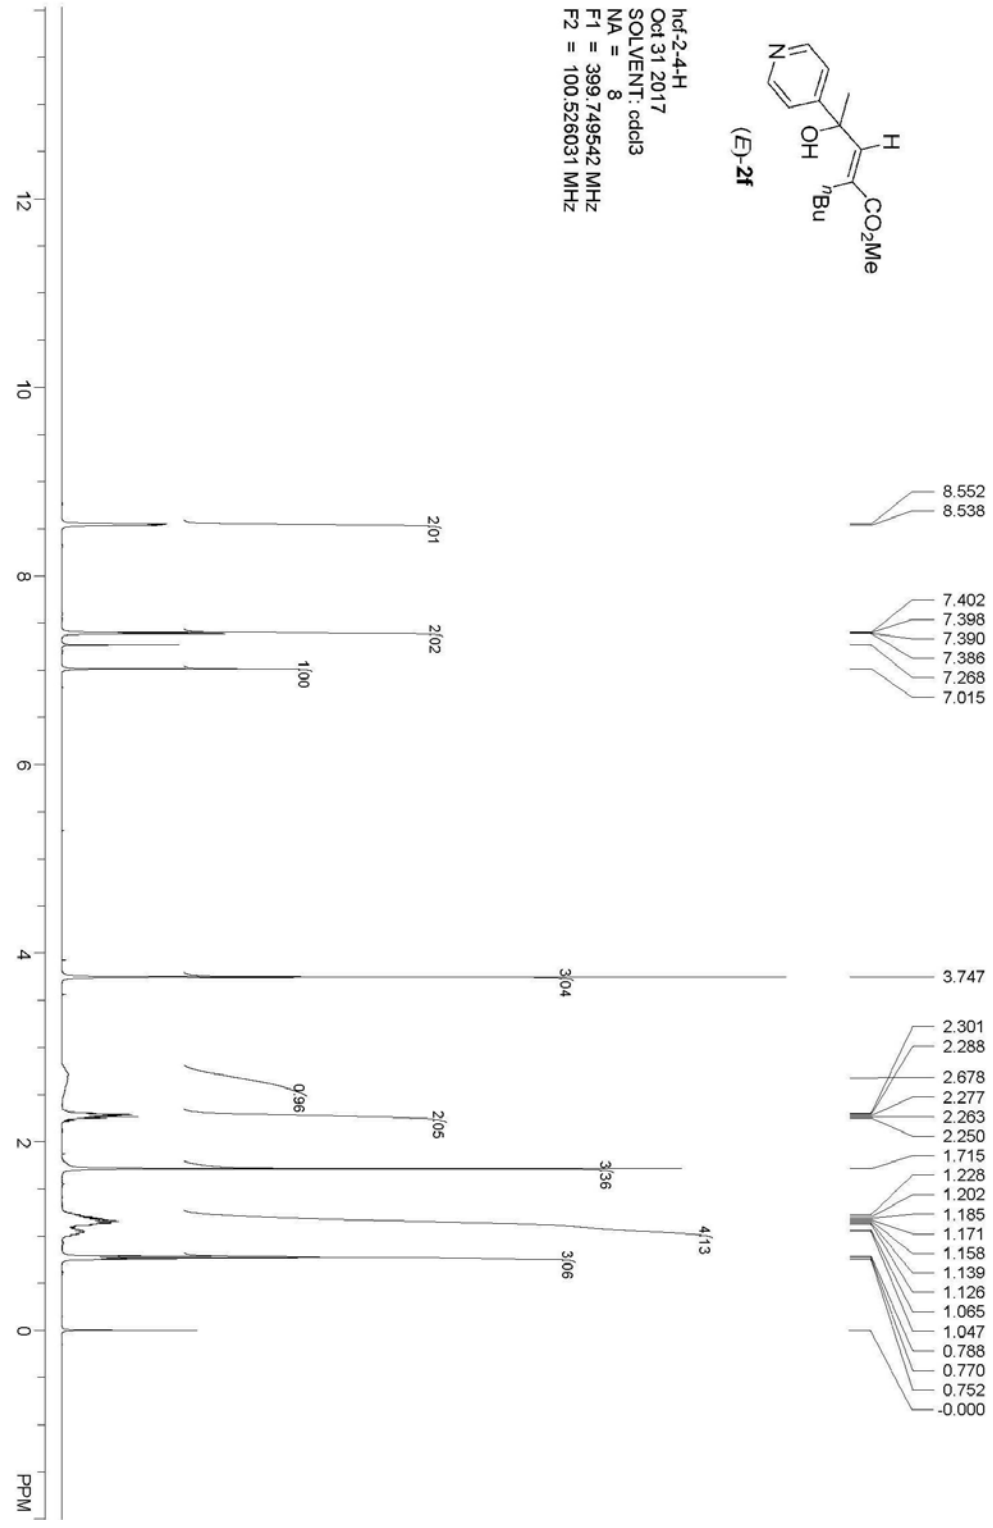



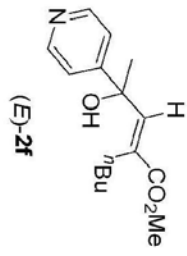

hcf-2-4-C  
 Sep 27 2017  
 SOLVENT: CDCl3  
 NA = 156  
 F1 = 100.615791 MHz  
 F2 = 1.000000 MHz

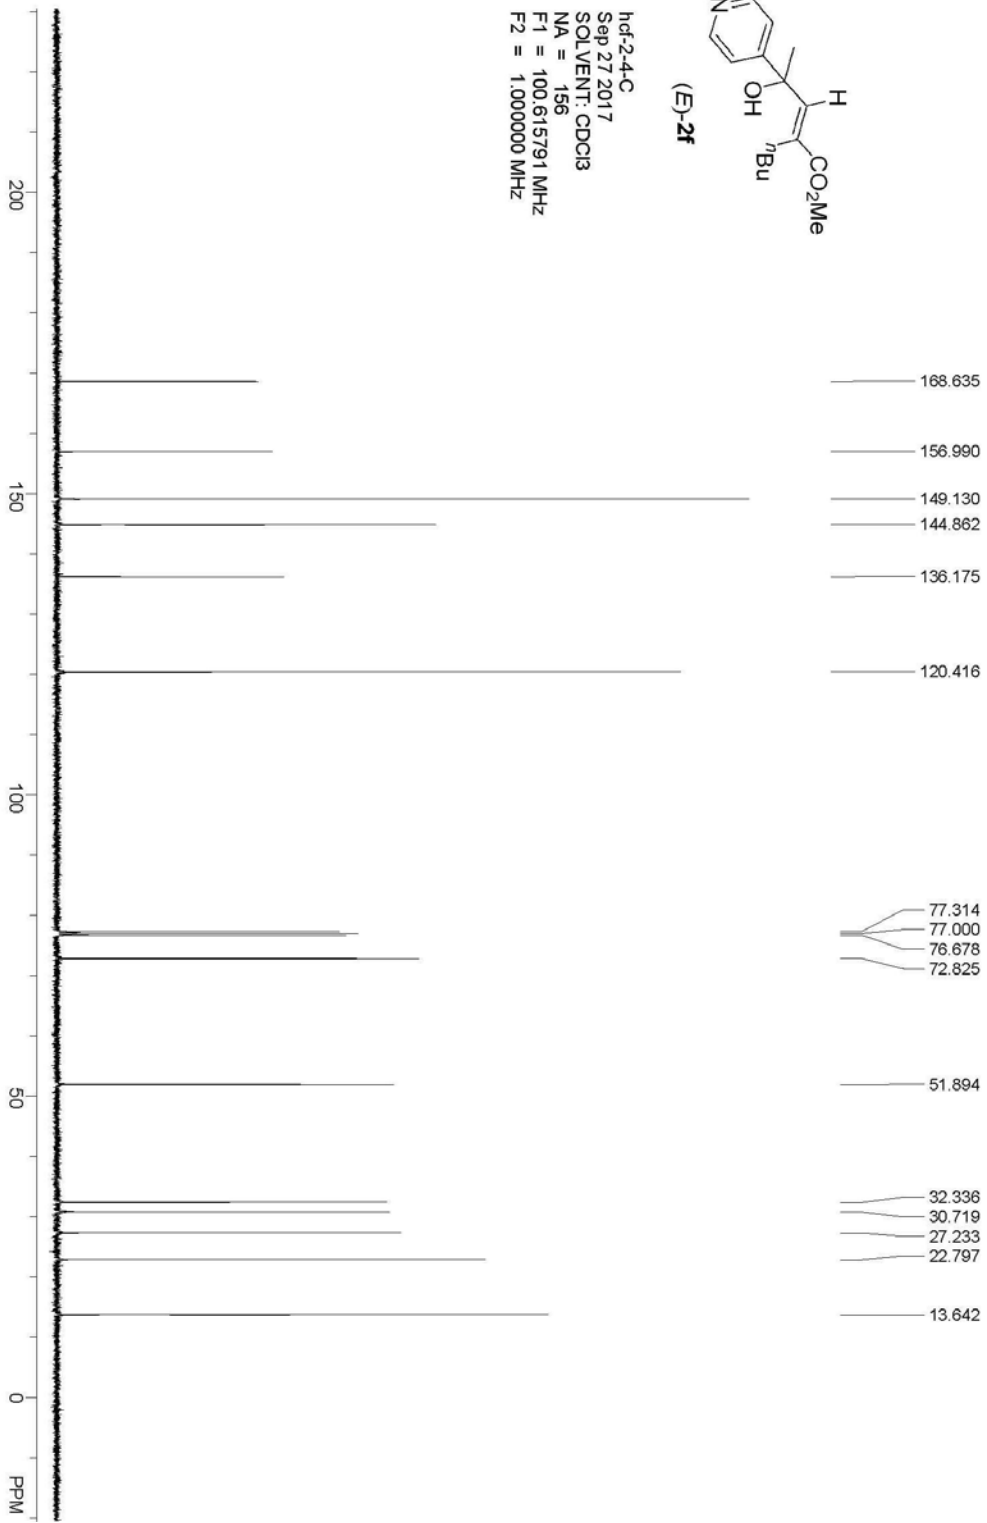

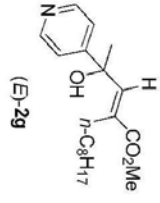

hnf-2-27-H  
 Oct 19 2018  
 SOLVENT: cdcl3  
 NA = 4  
 F1 = 399.749542 MHz  
 F2 = 100.526031 MHz

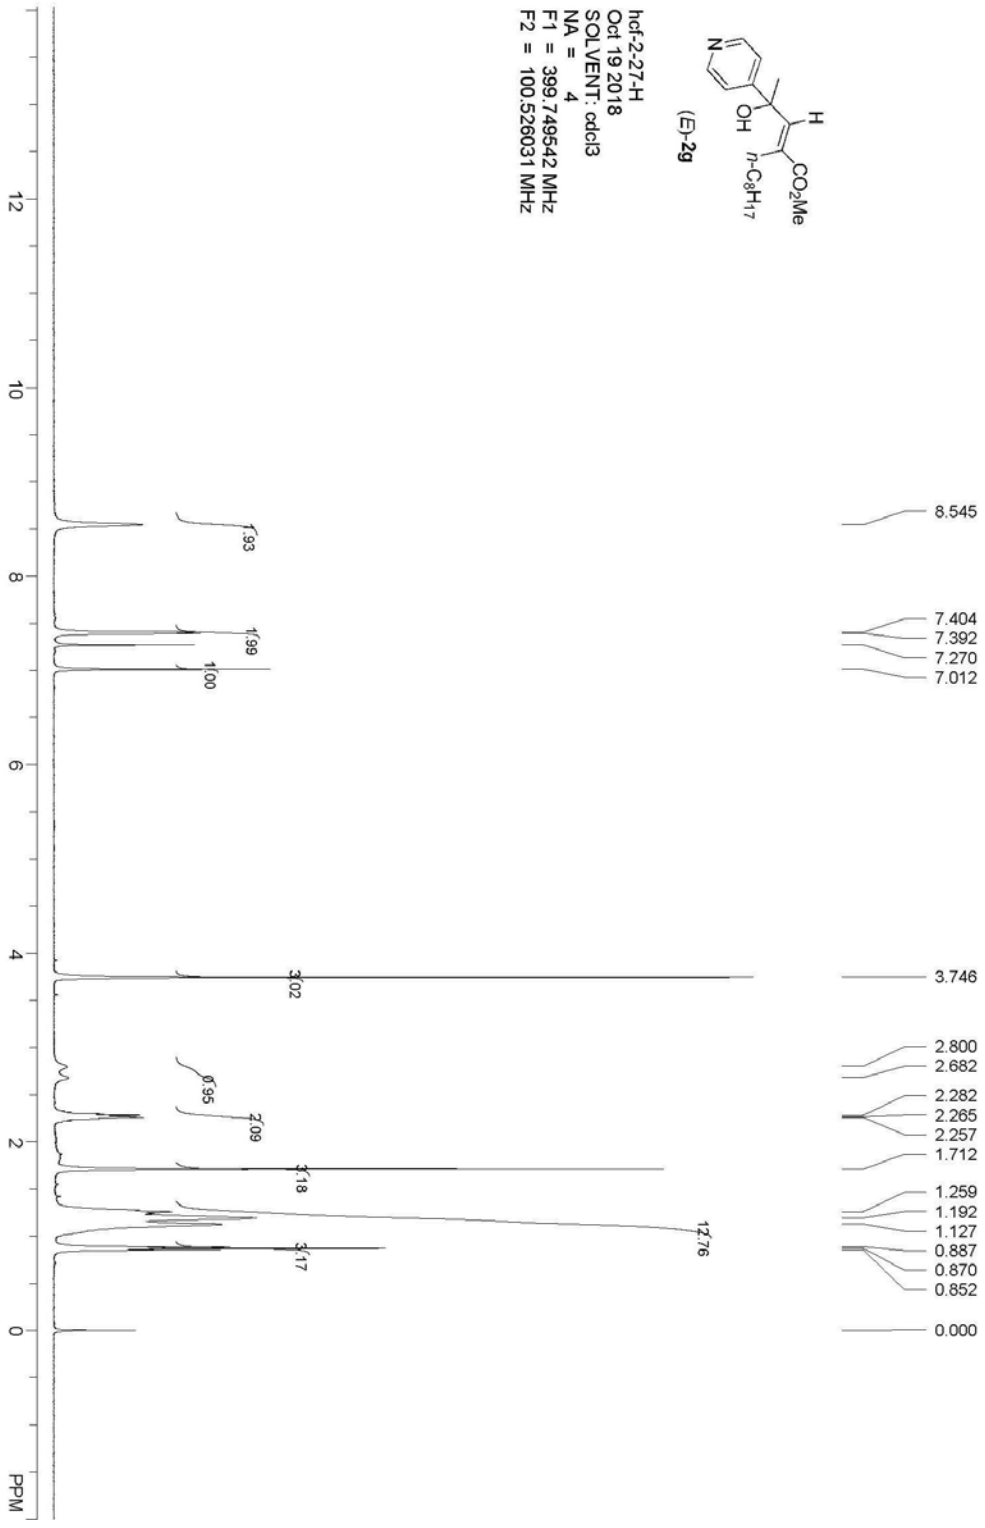

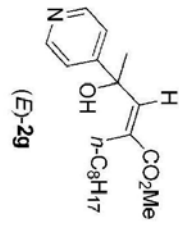

hmf-2-27-C  
 Oct 19 2017  
 SOLVENT: cddcl3  
 NA = 512  
 F1 = 100.527557 MHz  
 F2 = 399.749146 MHz

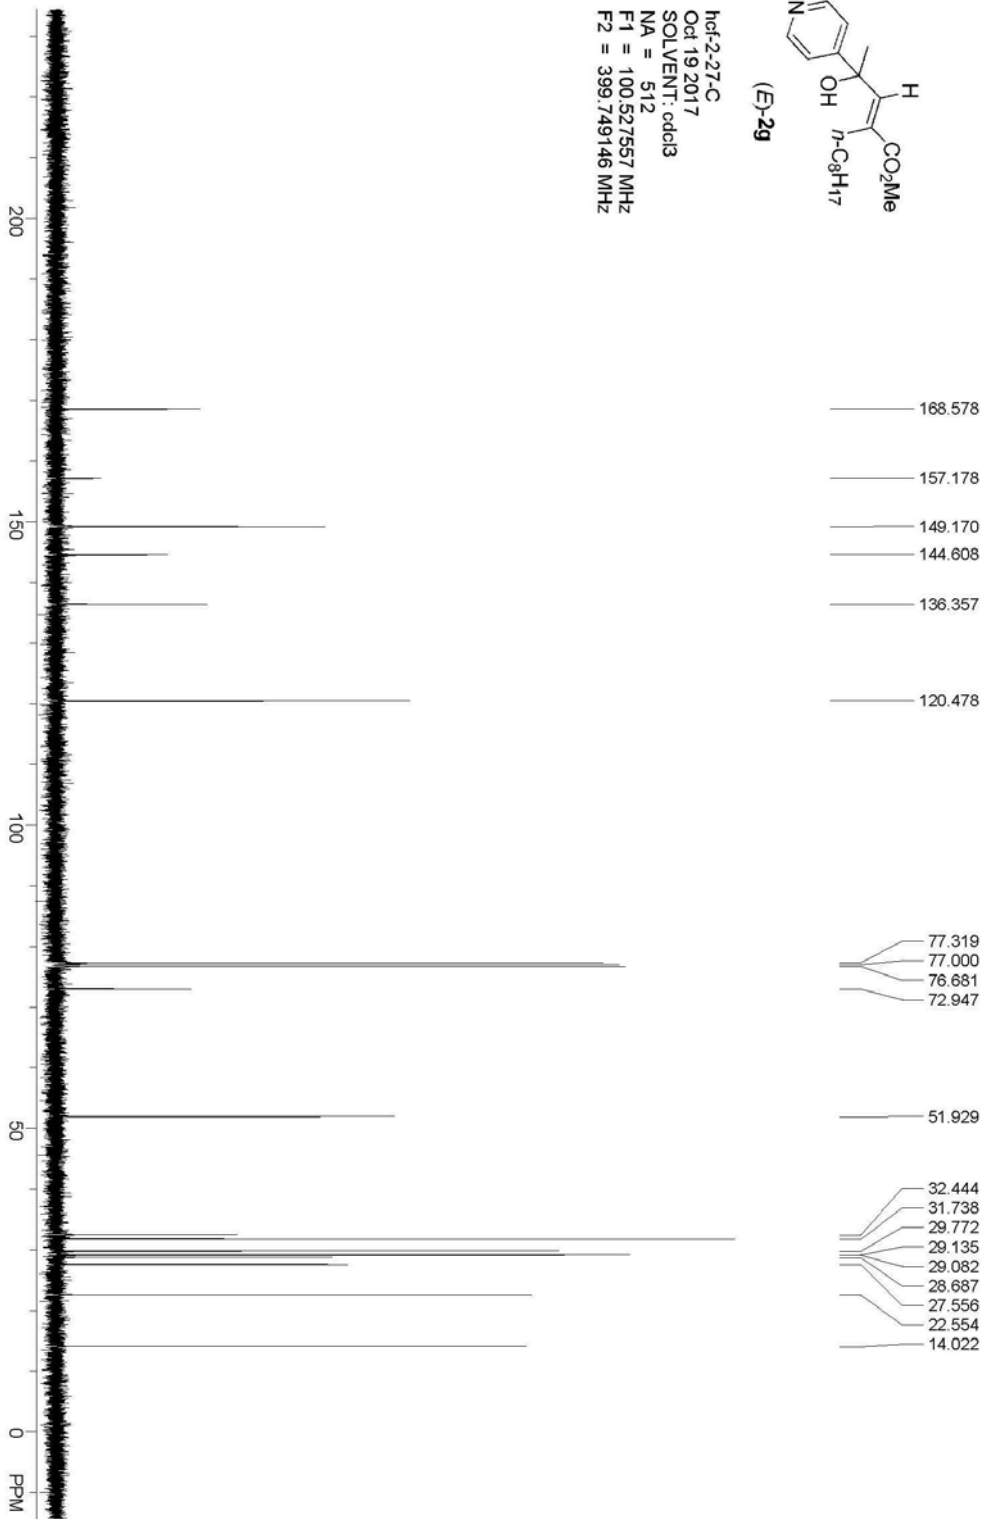

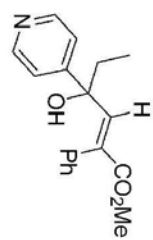

(E)-2h

hcf-1-199-H  
 Oct 31 2017  
 SOLVENT: cdcl3  
 NA = 8  
 F1 = 399.749542 MHz  
 F2 = 100.526031 MHz

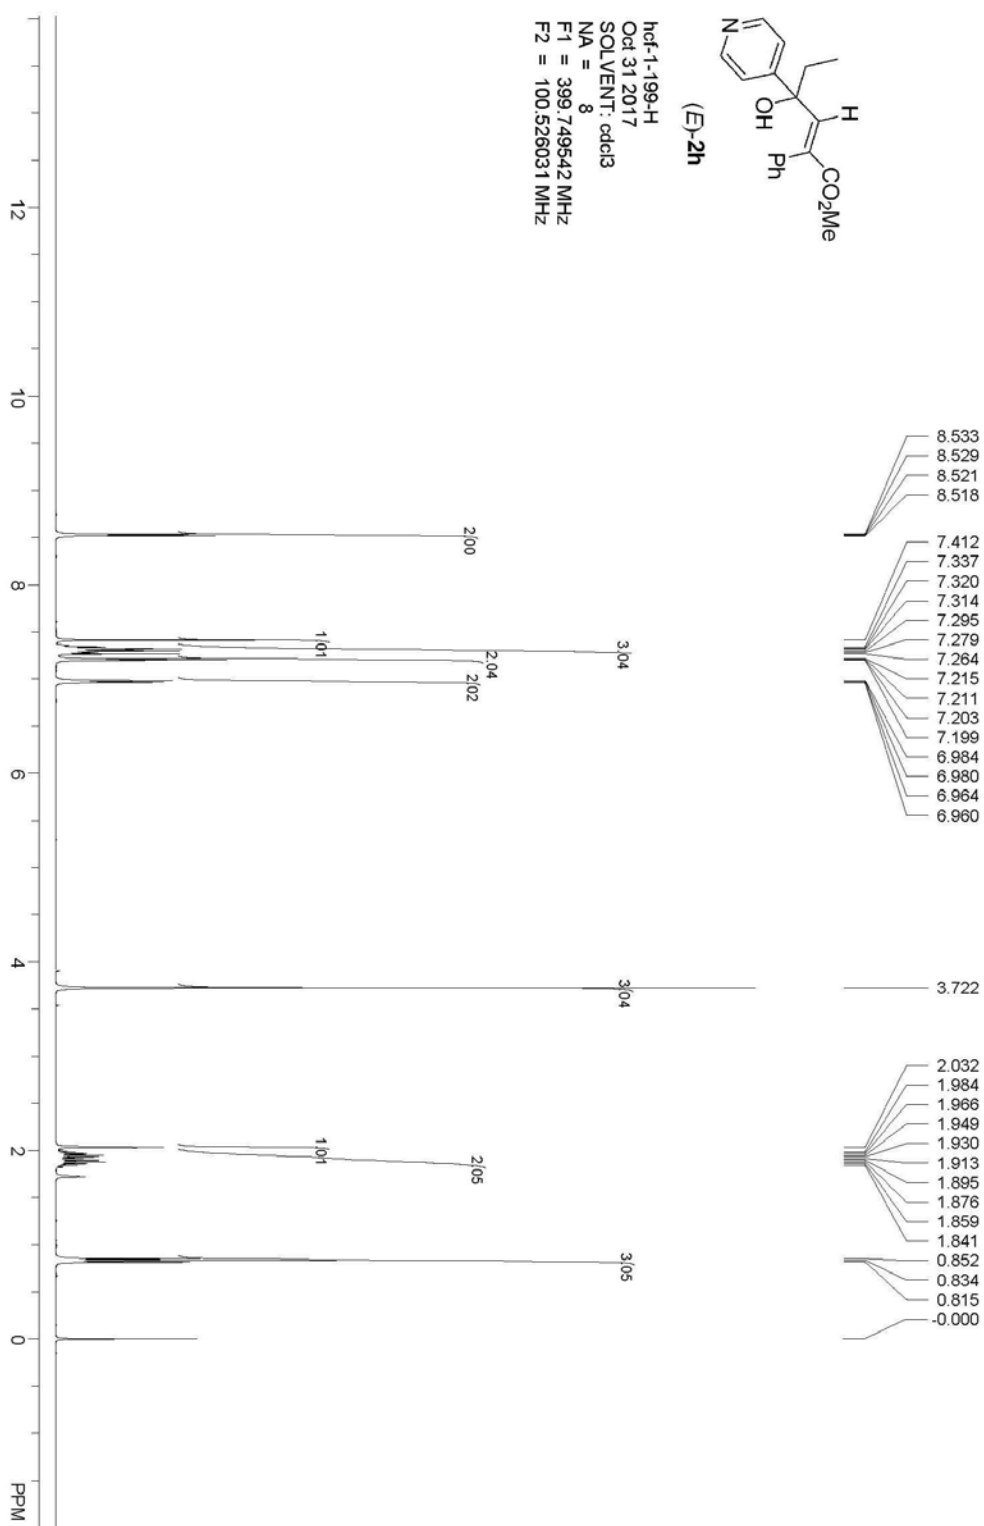

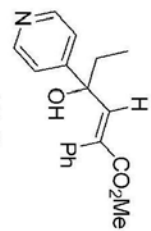

hcf-1-199-C  
 Sep 30 2017  
 SOLVENT: CDCl3  
 NA = 1024  
 F1 = 100.605225 MHz  
 F2 = 1.000000 MHz

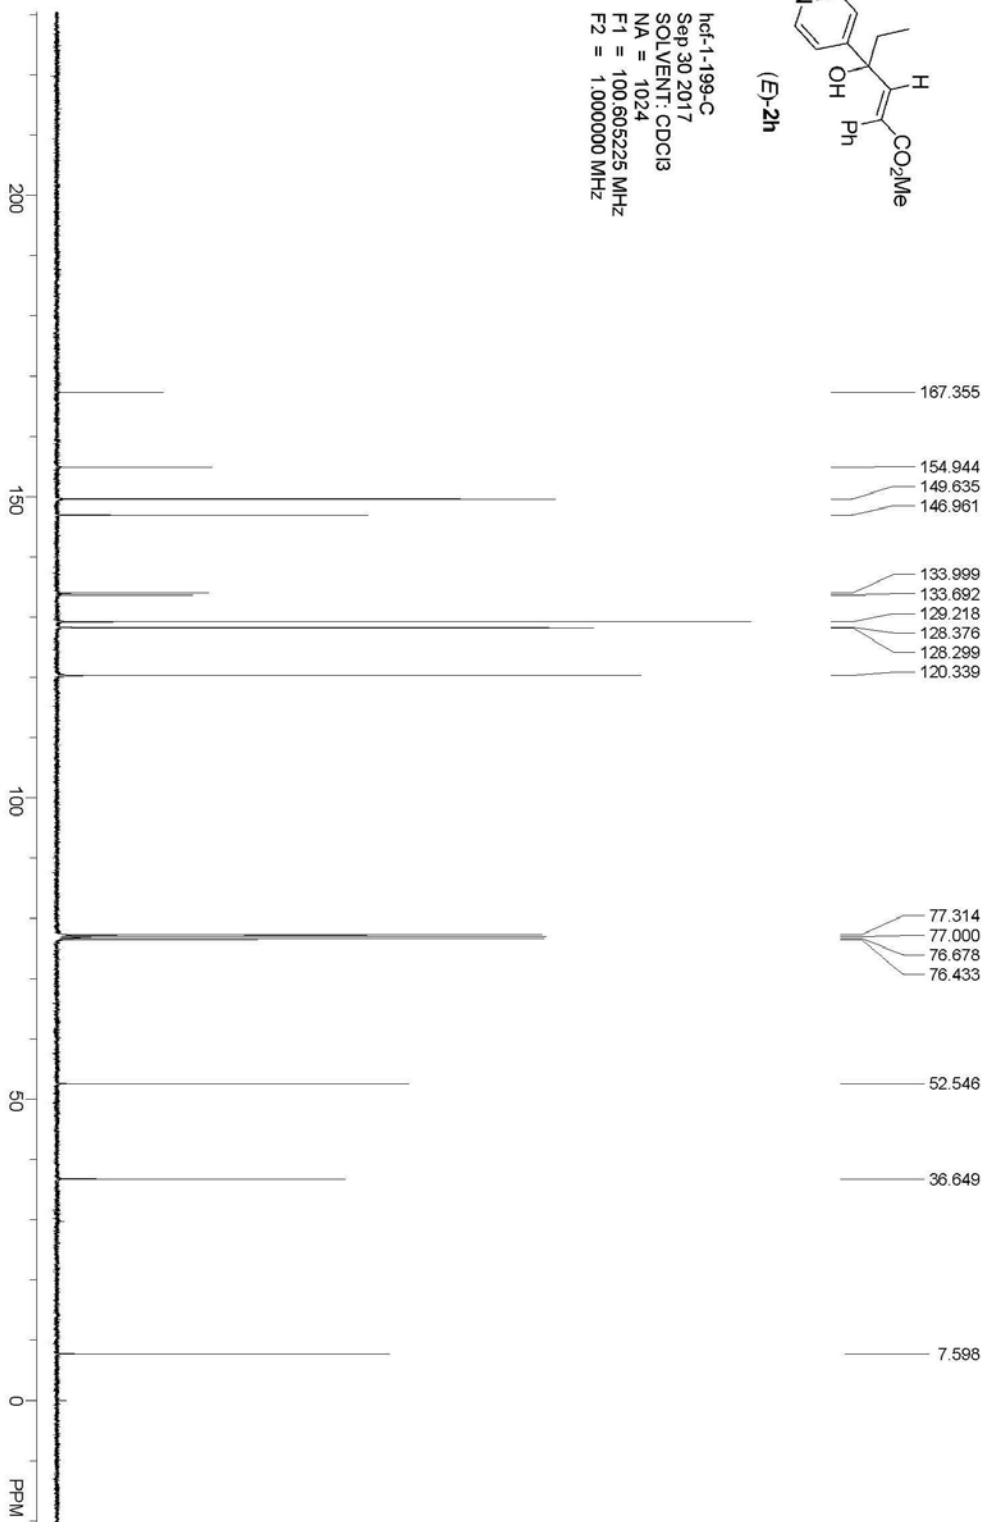

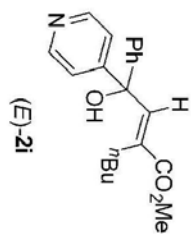

hcf2-70-H  
 Jan 8 2018  
 SOLVENT: cdcl3  
 NA = 4  
 F1 = 399.749542 MHz  
 F2 = 100.526031 MHz

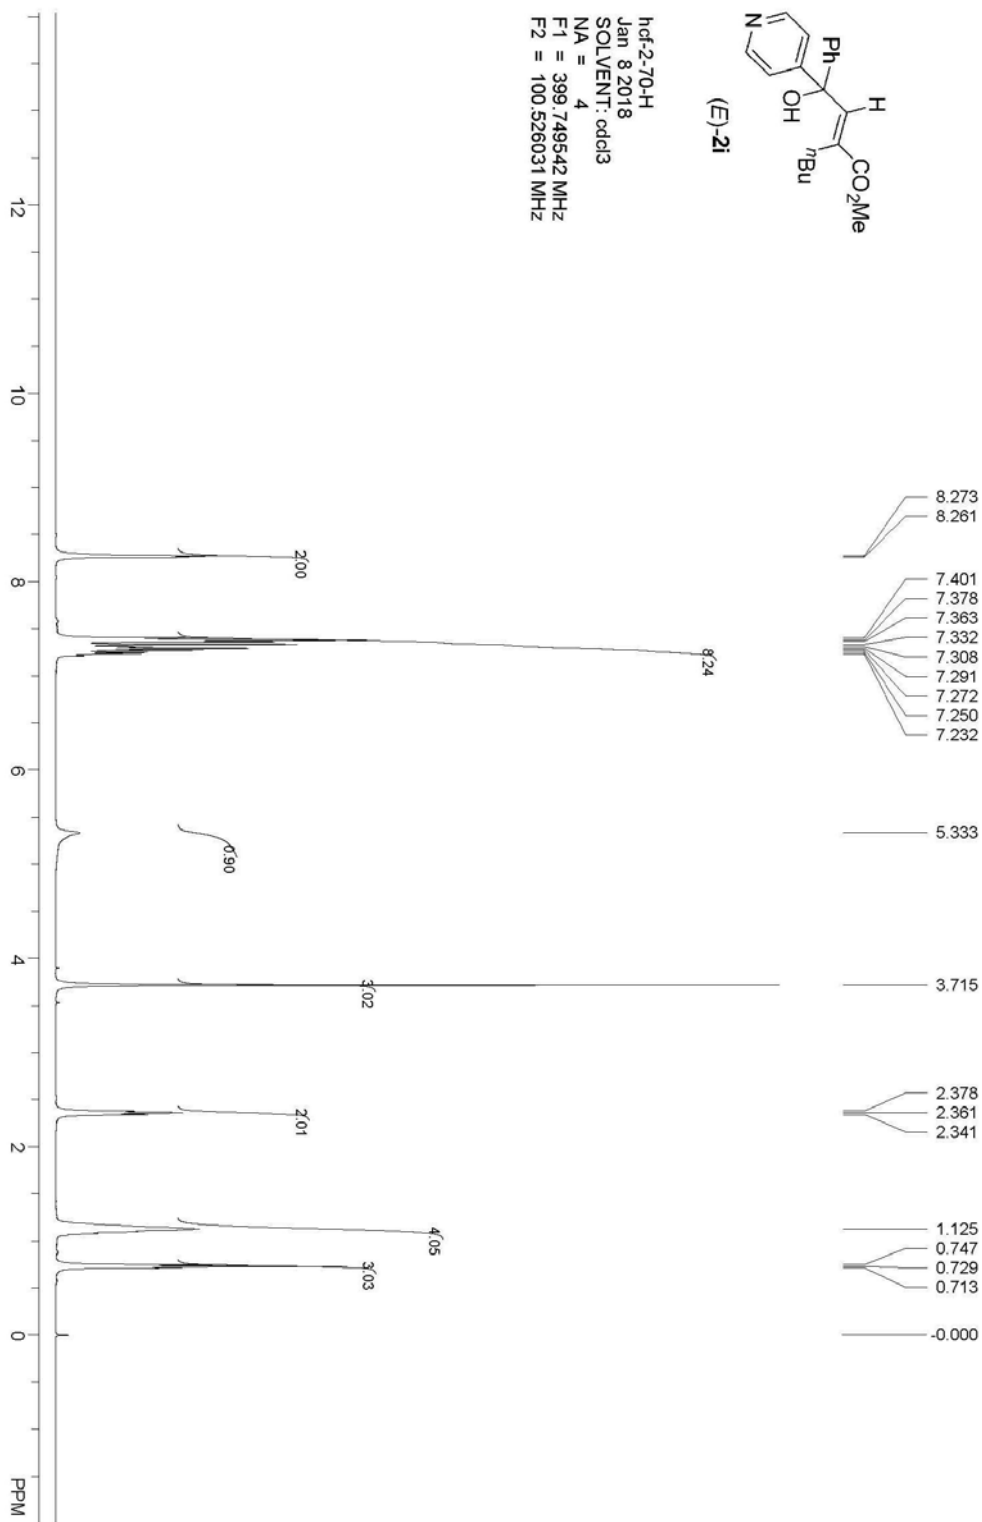

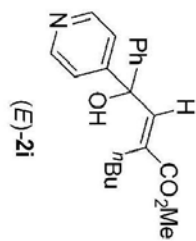

hot-2-70-C  
 Jan 8 2018  
 SOLVENT: cdcl3  
 NA = 512  
 F1 = 100.527557 MHz  
 F2 = 399.749146 MHz

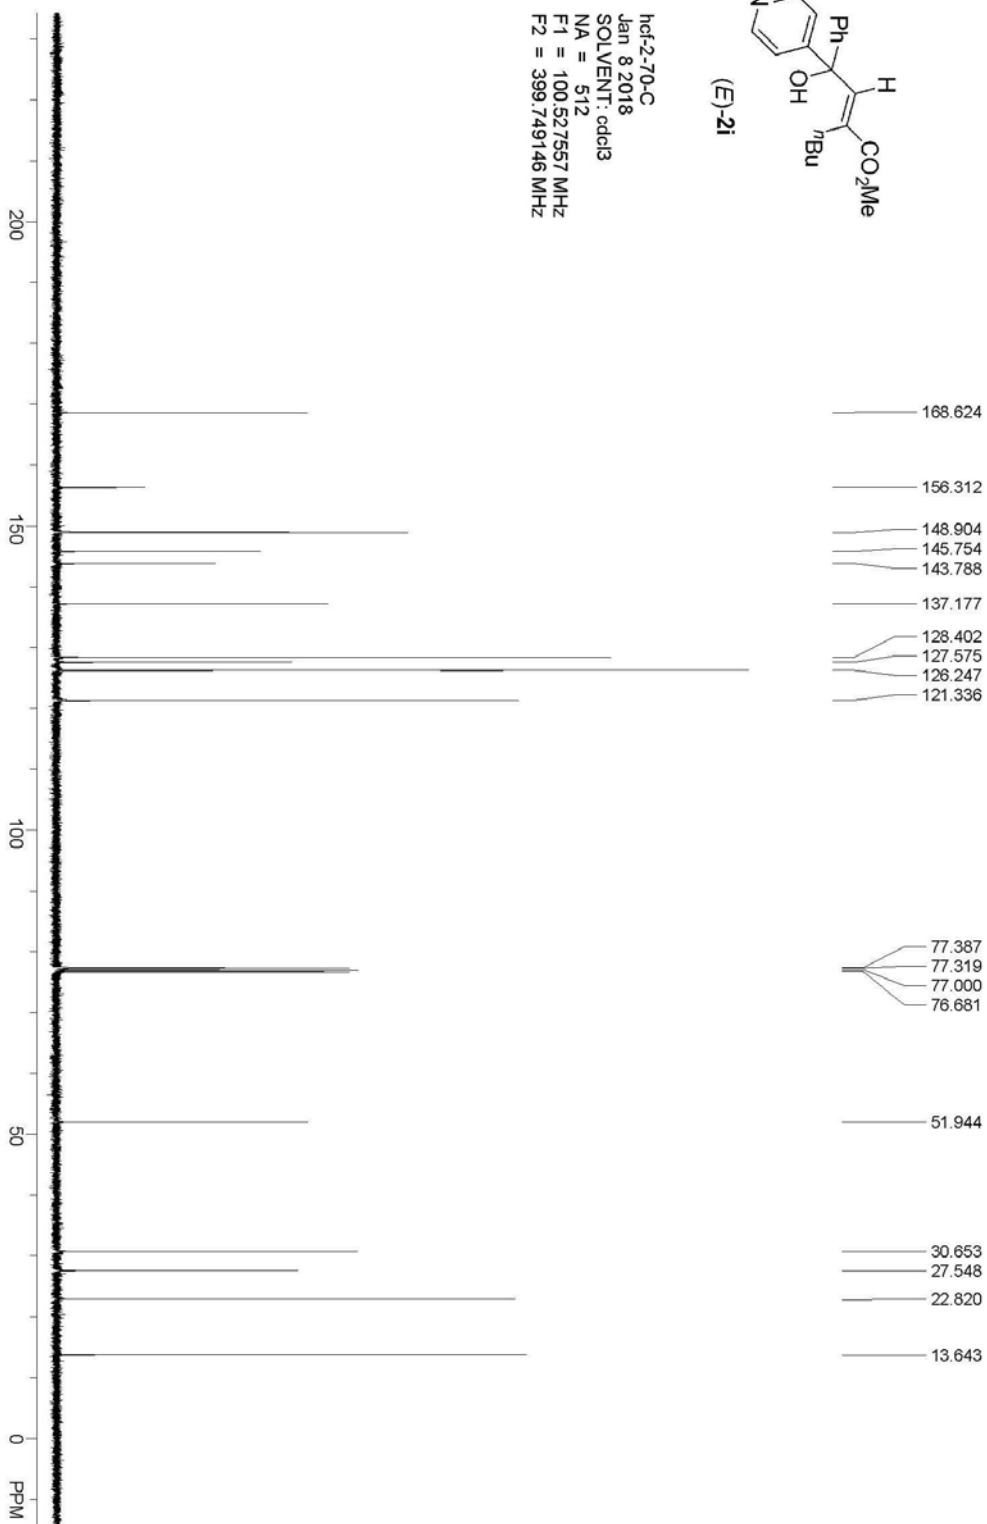

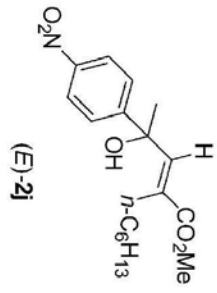

hcf-2-82-H  
 Dec 7 2017  
 SOLVENT: cdcl3  
 NA = 8  
 F1 = 399.749542 MHz  
 F2 = 100.526031 MHz

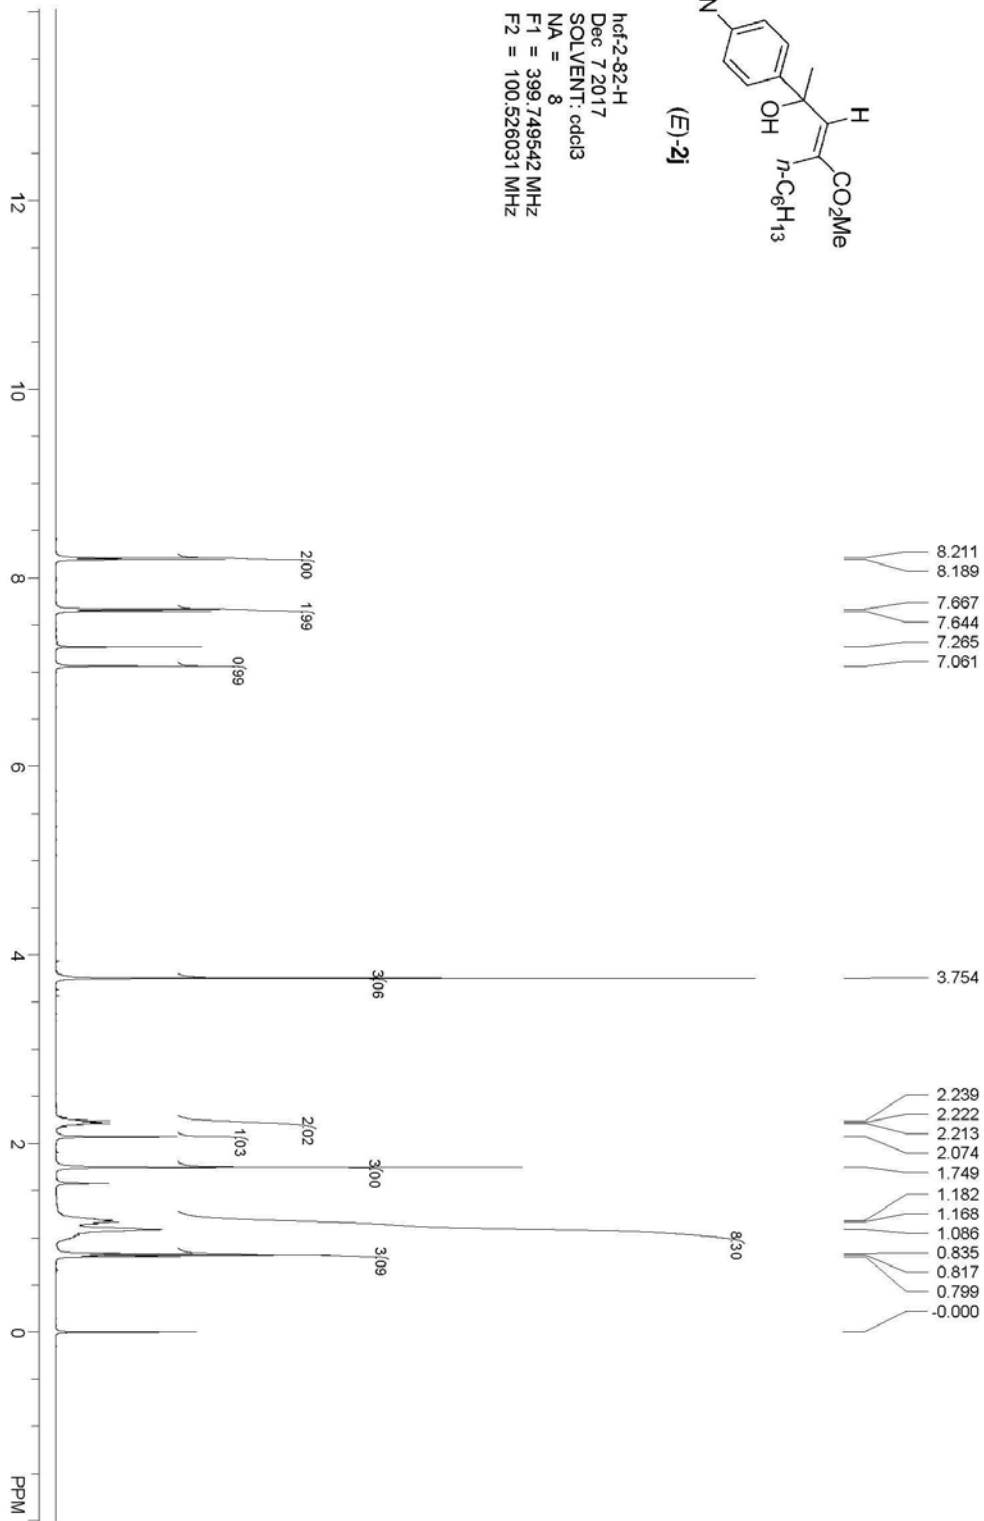



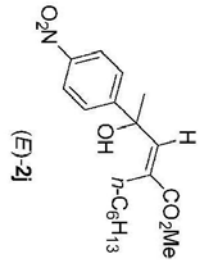

hcf2-82-C  
 Dec 7 2017  
 SOLVENT: cdcl3  
 NA = 1000  
 F1 = 100.527557 MHz  
 F2 = 399.749146 MHz

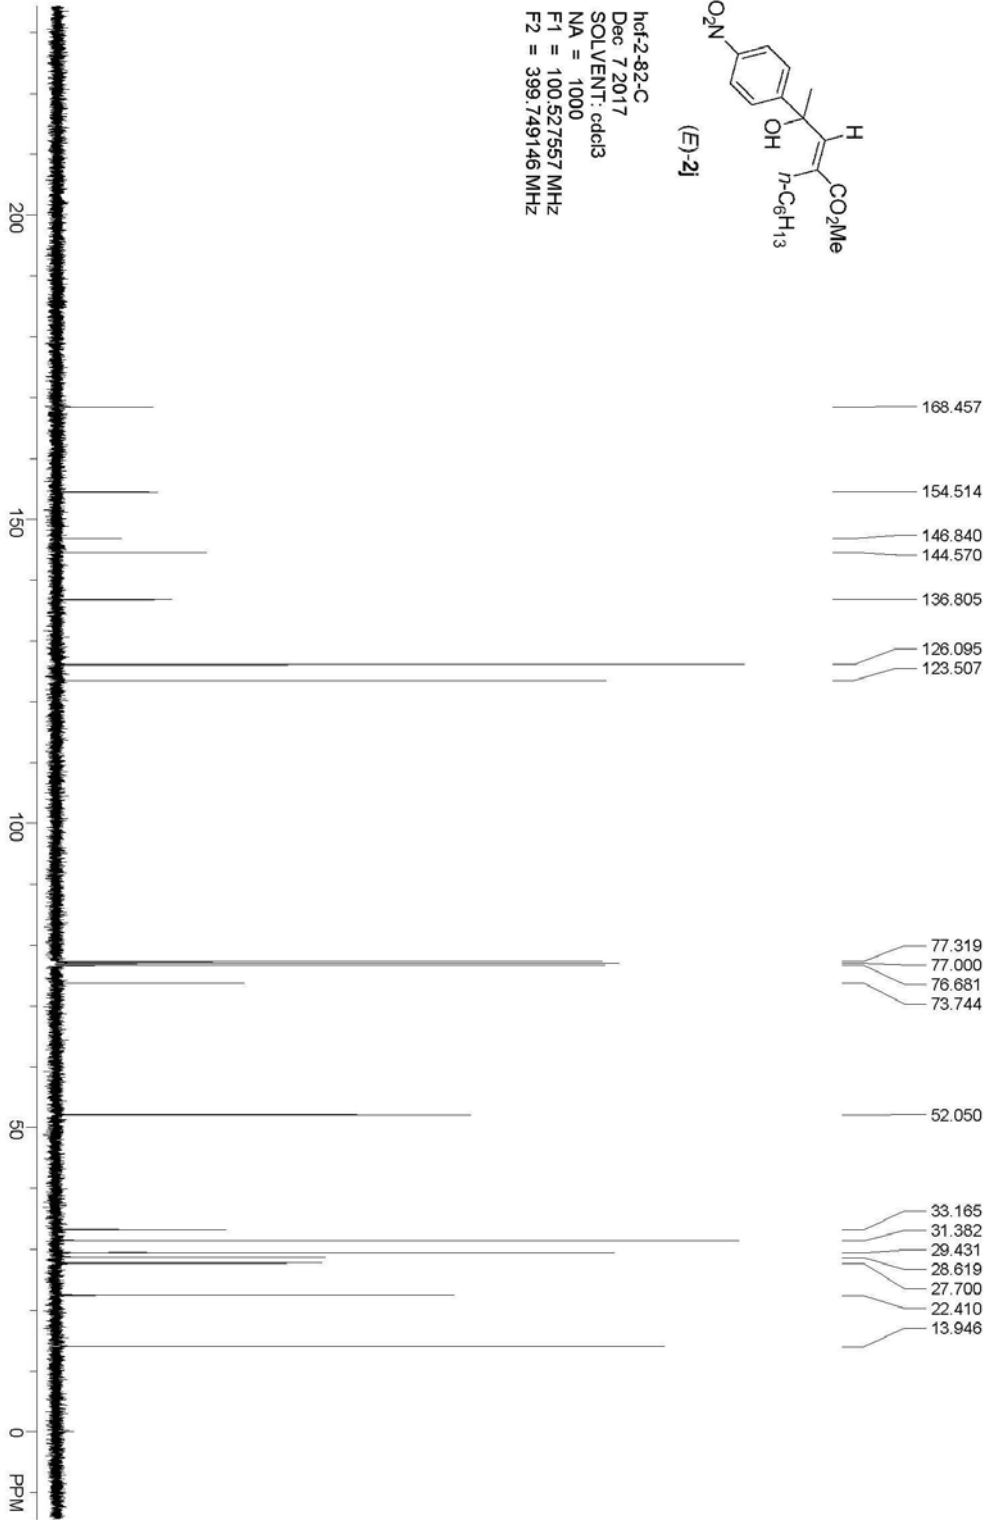

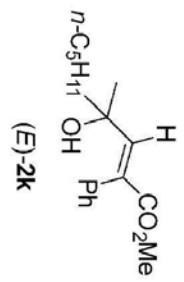

hcf-2-46-H  
 Nov 3 2017  
 SOLVENT: cdcl3  
 NA = 8  
 F1 = 399.749542 MHz  
 F2 = 100.528031 MHz

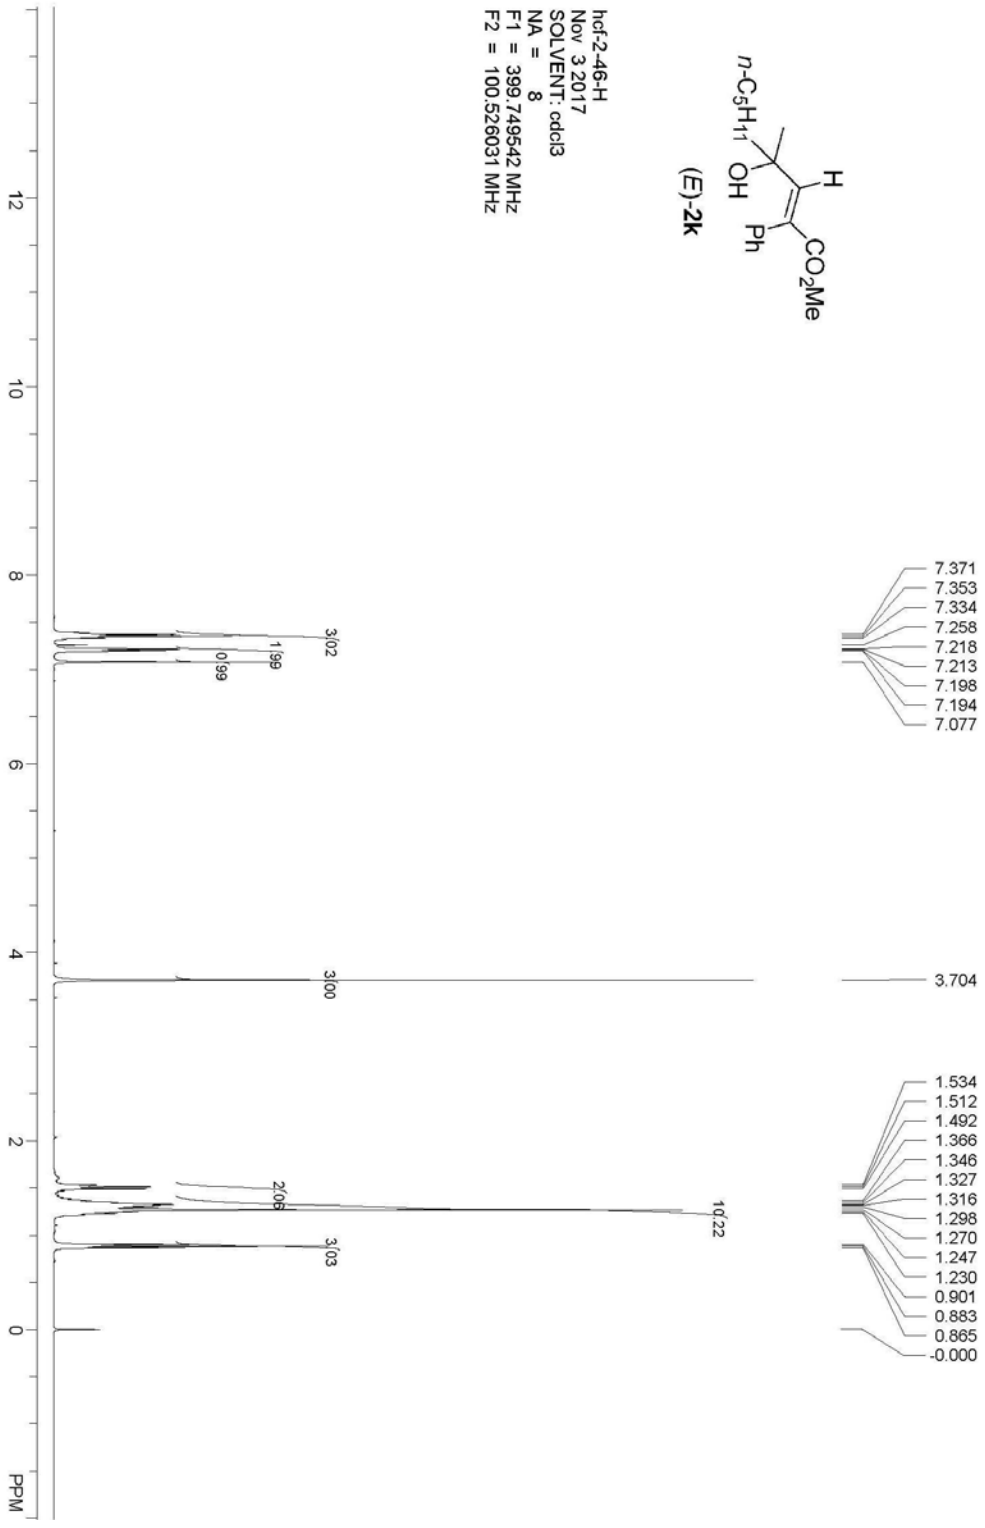

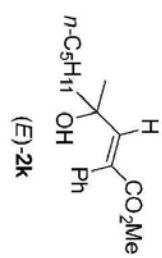

hcf-2-46-C  
 Nov 2 2017  
 SOLVENT: odd13  
 NA = 512  
 F1 = 100.527557 MHz  
 F2 = 399.749146 MHz

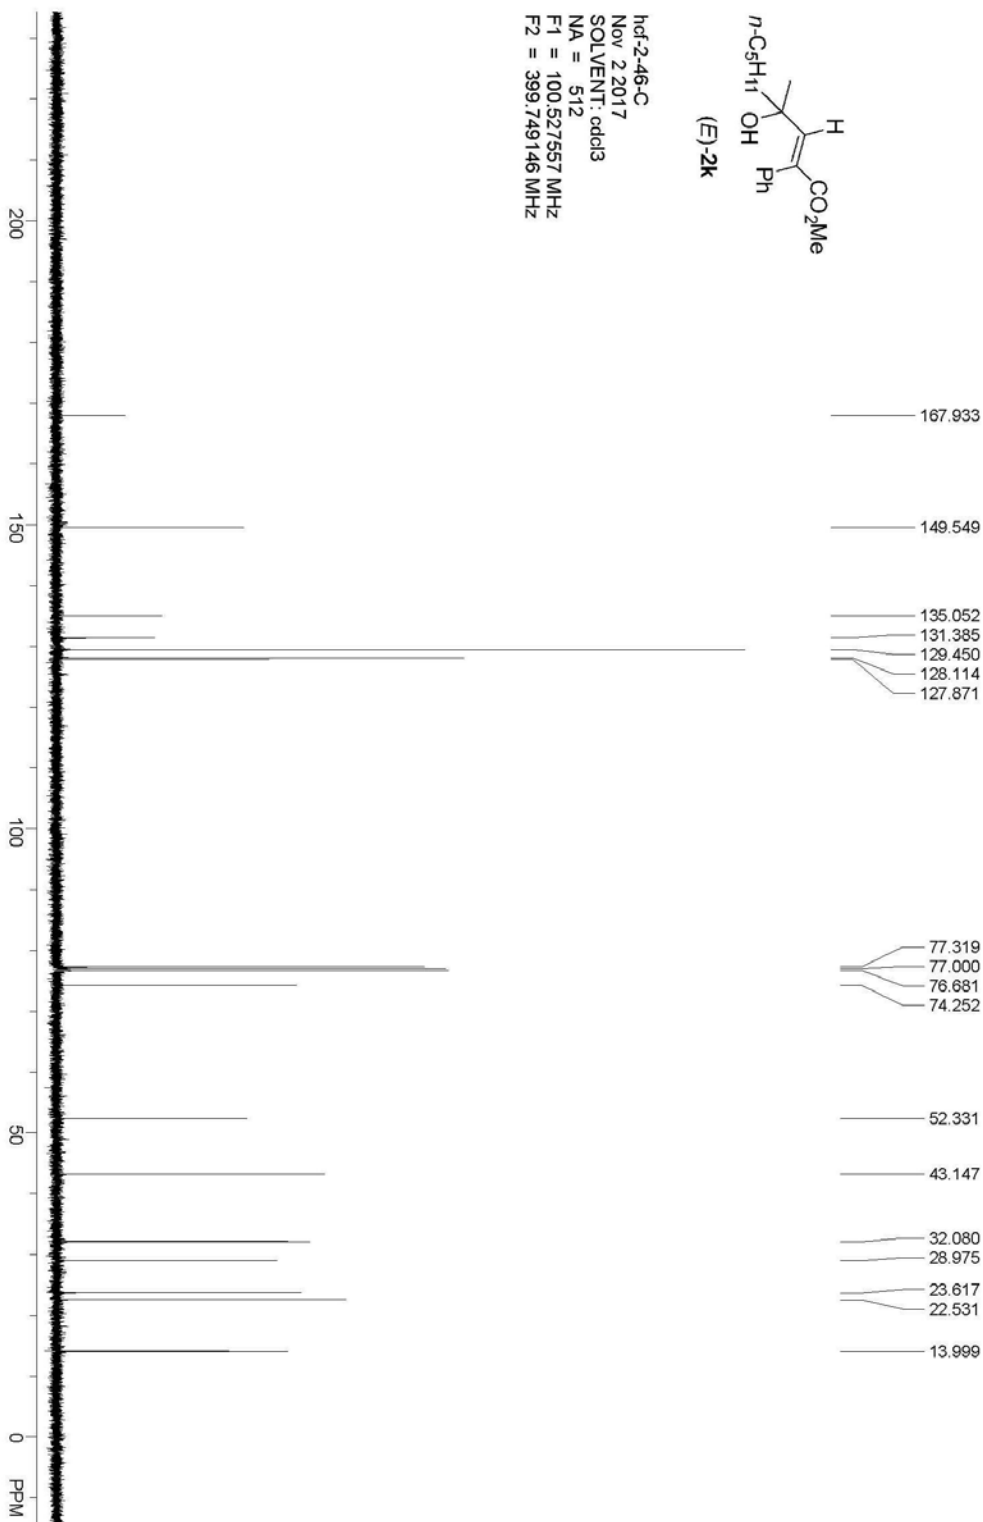

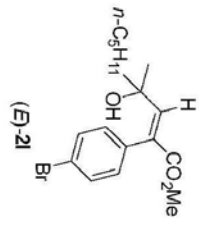

hcf-2-60-H  
 Nov 16 2017  
 SOLVENT: cdcl3  
 NA = 8  
 F1 = 399.749542 MHz  
 F2 = 100.526031 MHz

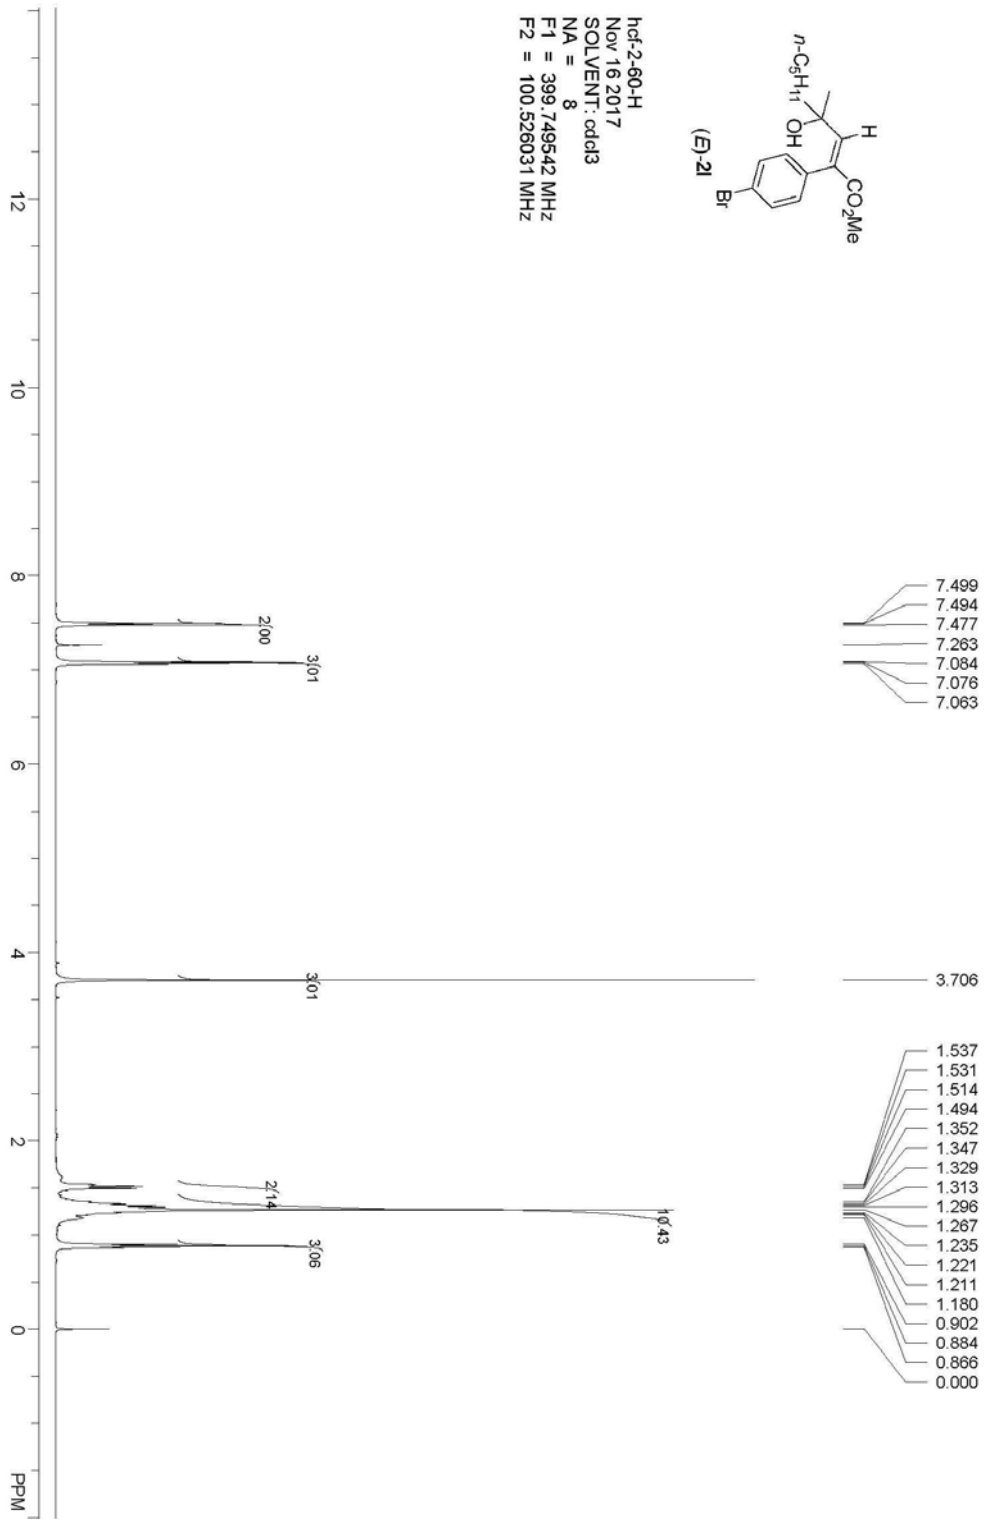

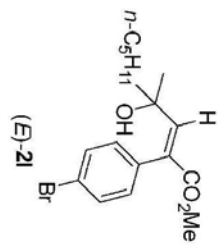

hcf-2-60-C  
 Nov 16 2017  
 SOLVENT: cddc3  
 NA = 512  
 F1 = 100.527557 MHz  
 F2 = 399.749146 MHz

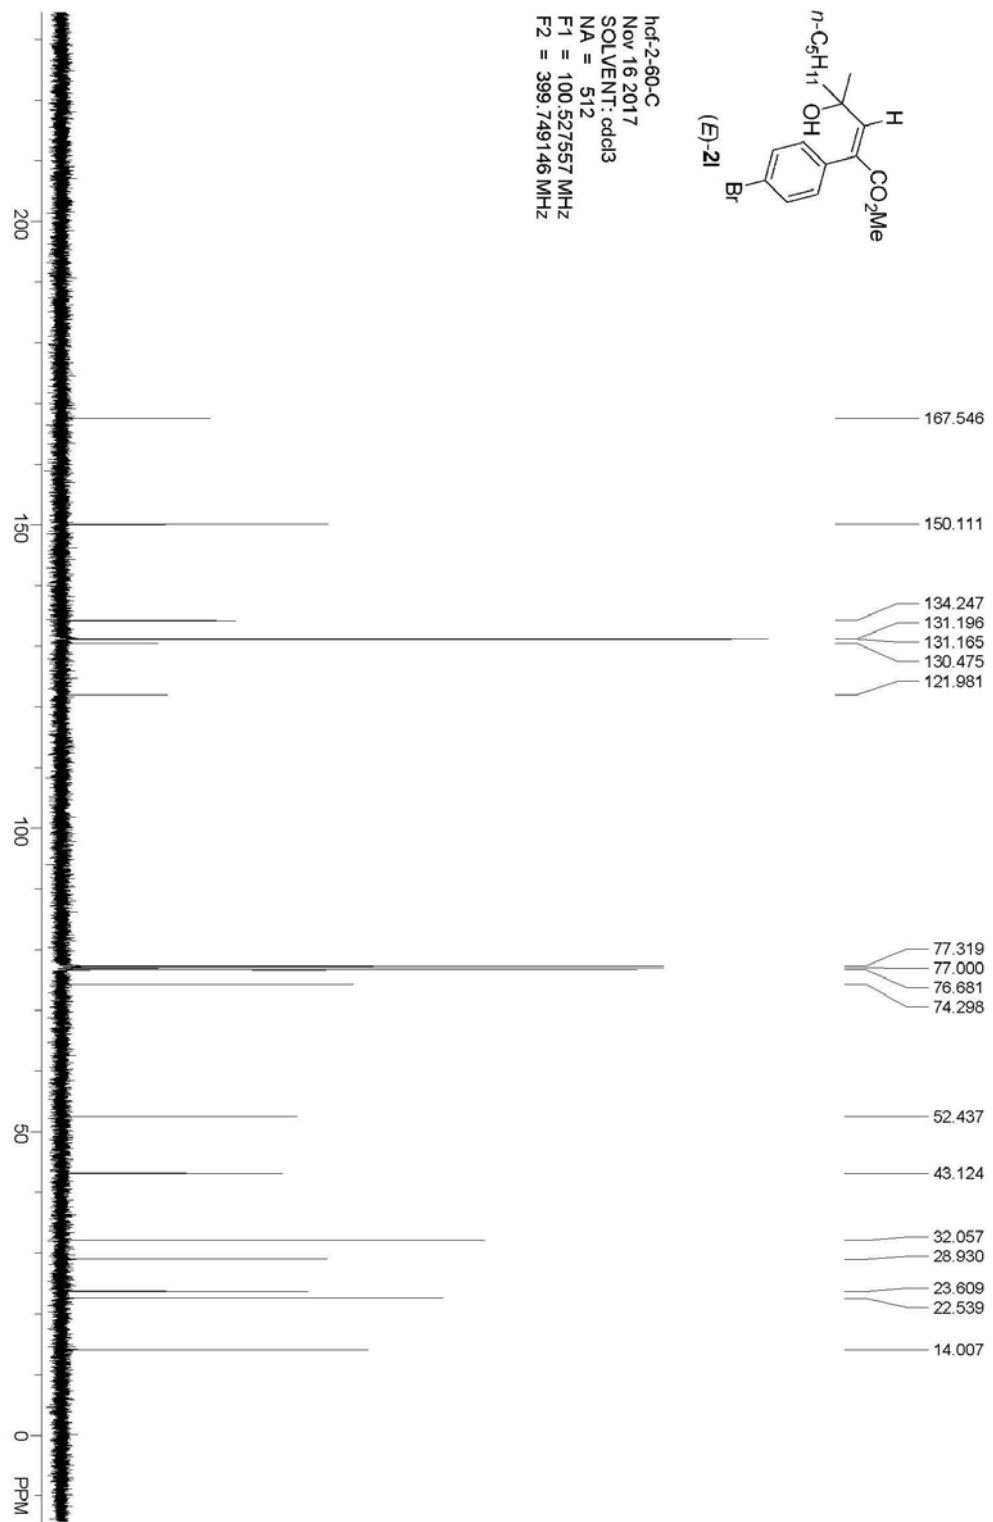

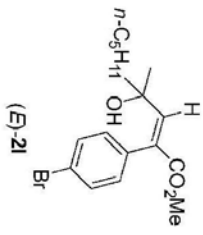

hcf-2-97-H  
 Dec 28 2017  
 SOLVENT: cdcl3  
 NA = 4  
 F1 = 399.749542 MHz  
 F2 = 100.526031 MHz

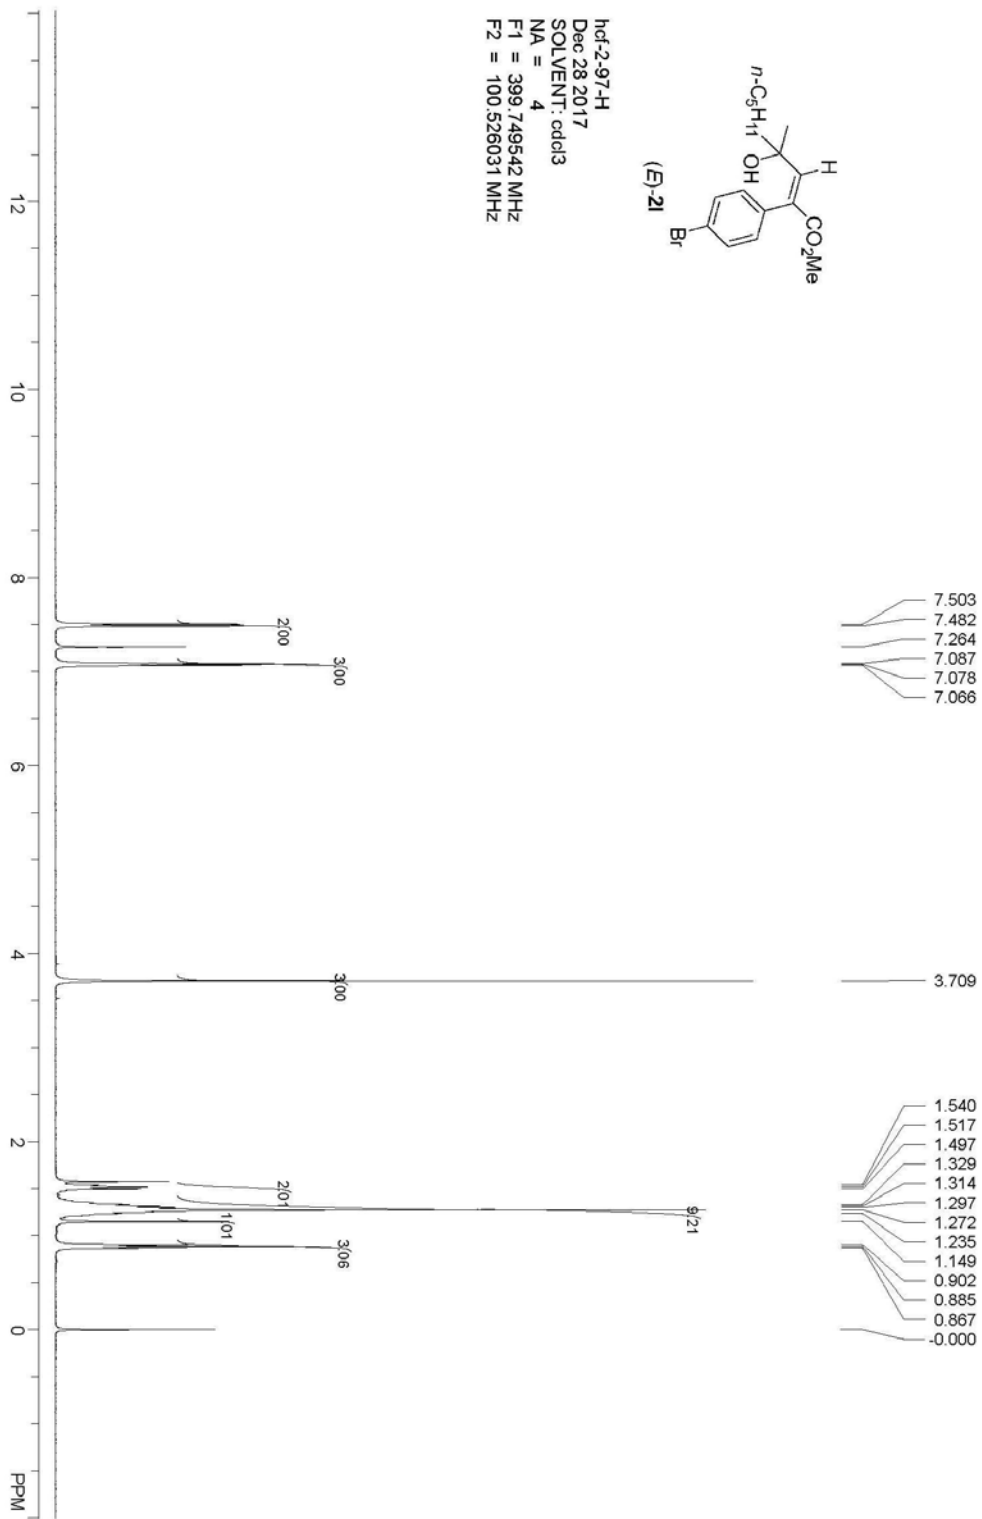

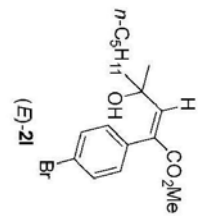

hsf-2-97-C  
 Dec 28 2017  
 SOLVENT: cdd3  
 NA = 512  
 F1 = 100.527557 MHz  
 F2 = 399.749146 MHz

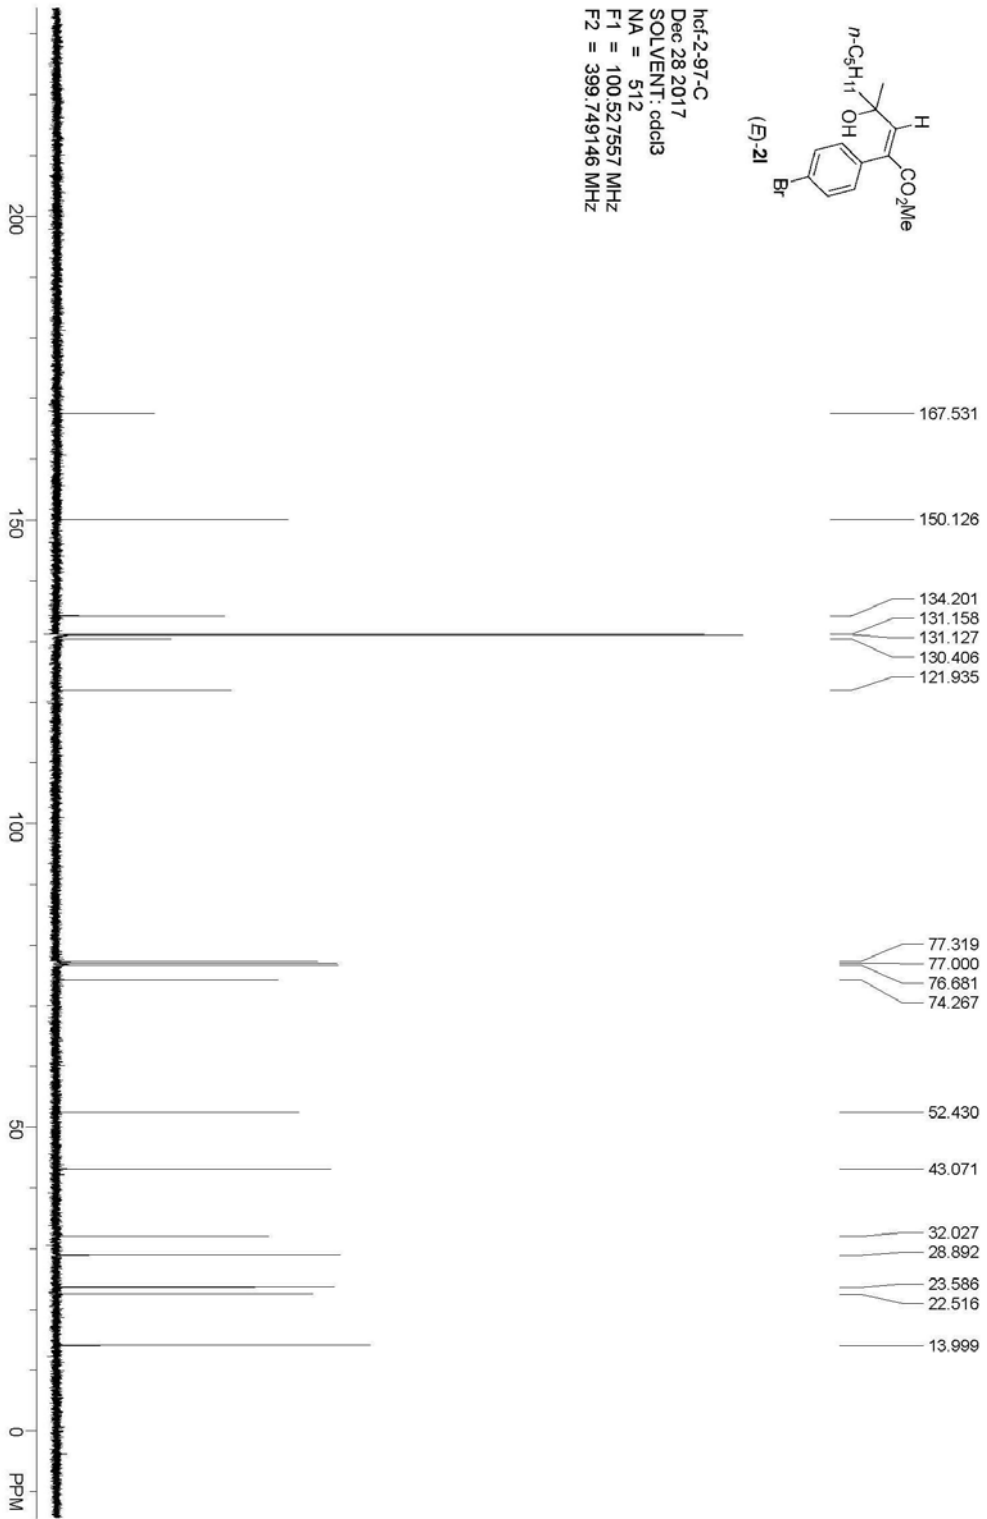

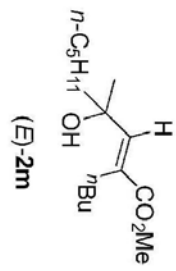

hcf-2-92-H  
 Dec-14-2017  
 SOLVENT: cdcl3  
 NA = 4  
 F1 = 399.749542 MHz  
 F2 = 100.526031 MHz

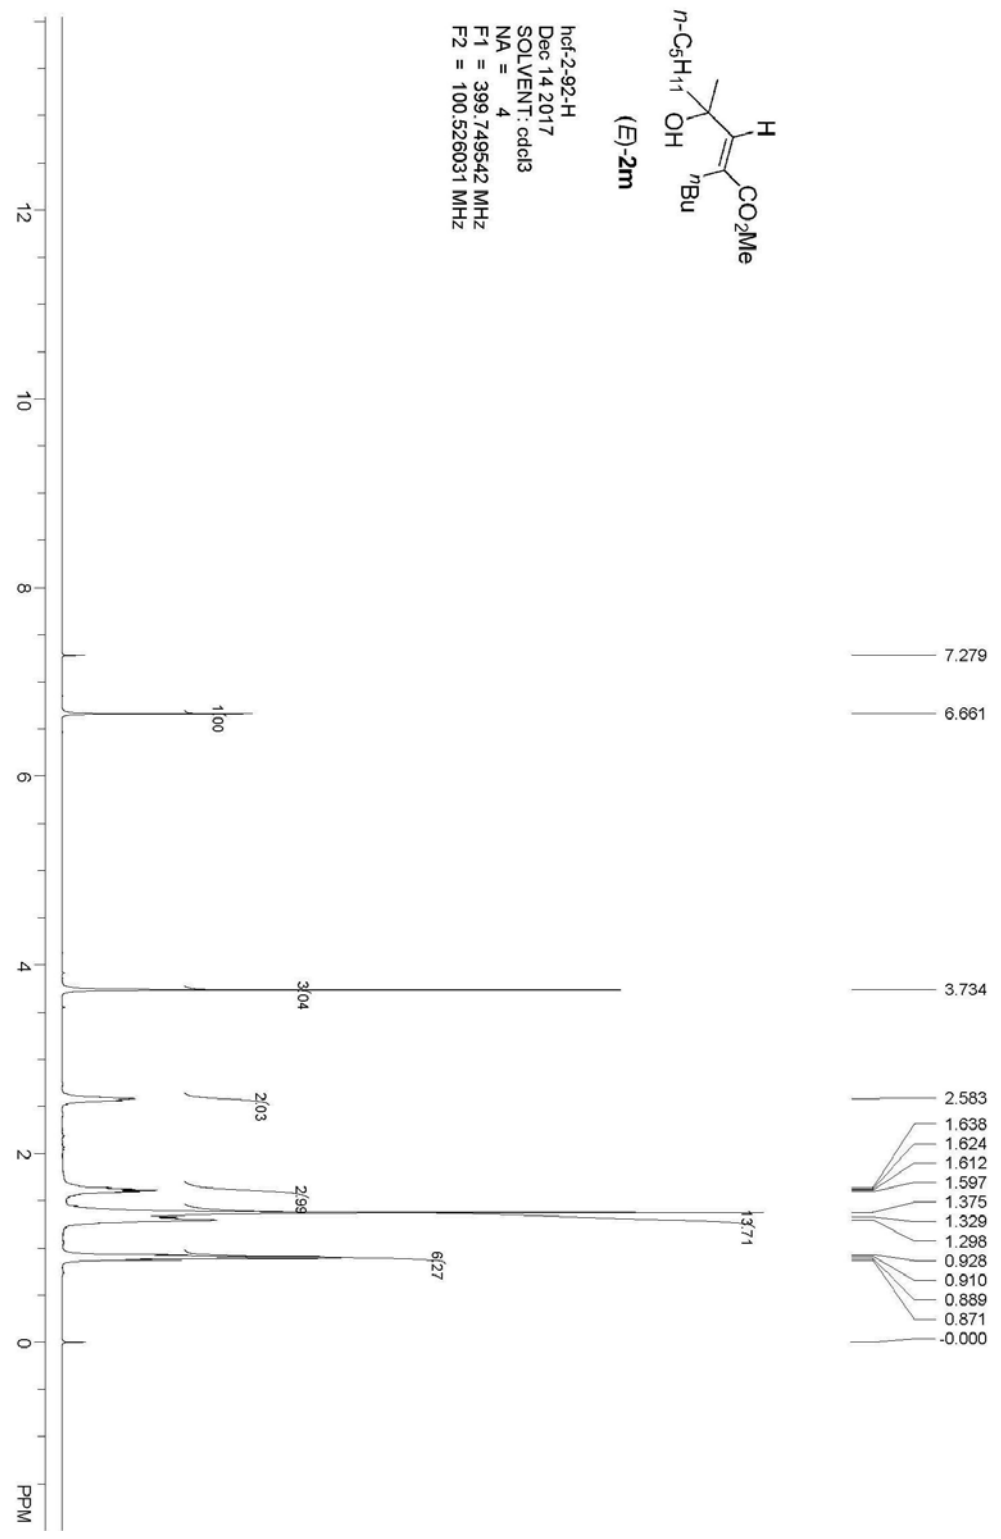



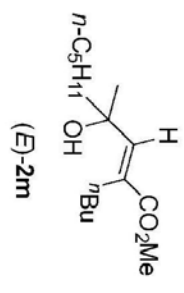

hcf:2-92-C  
 Dec 14 2017  
 SOLVENT: cdcl3  
 NA = 1000  
 F1 = 100.527557 MHz  
 F2 = 399.749146 MHz

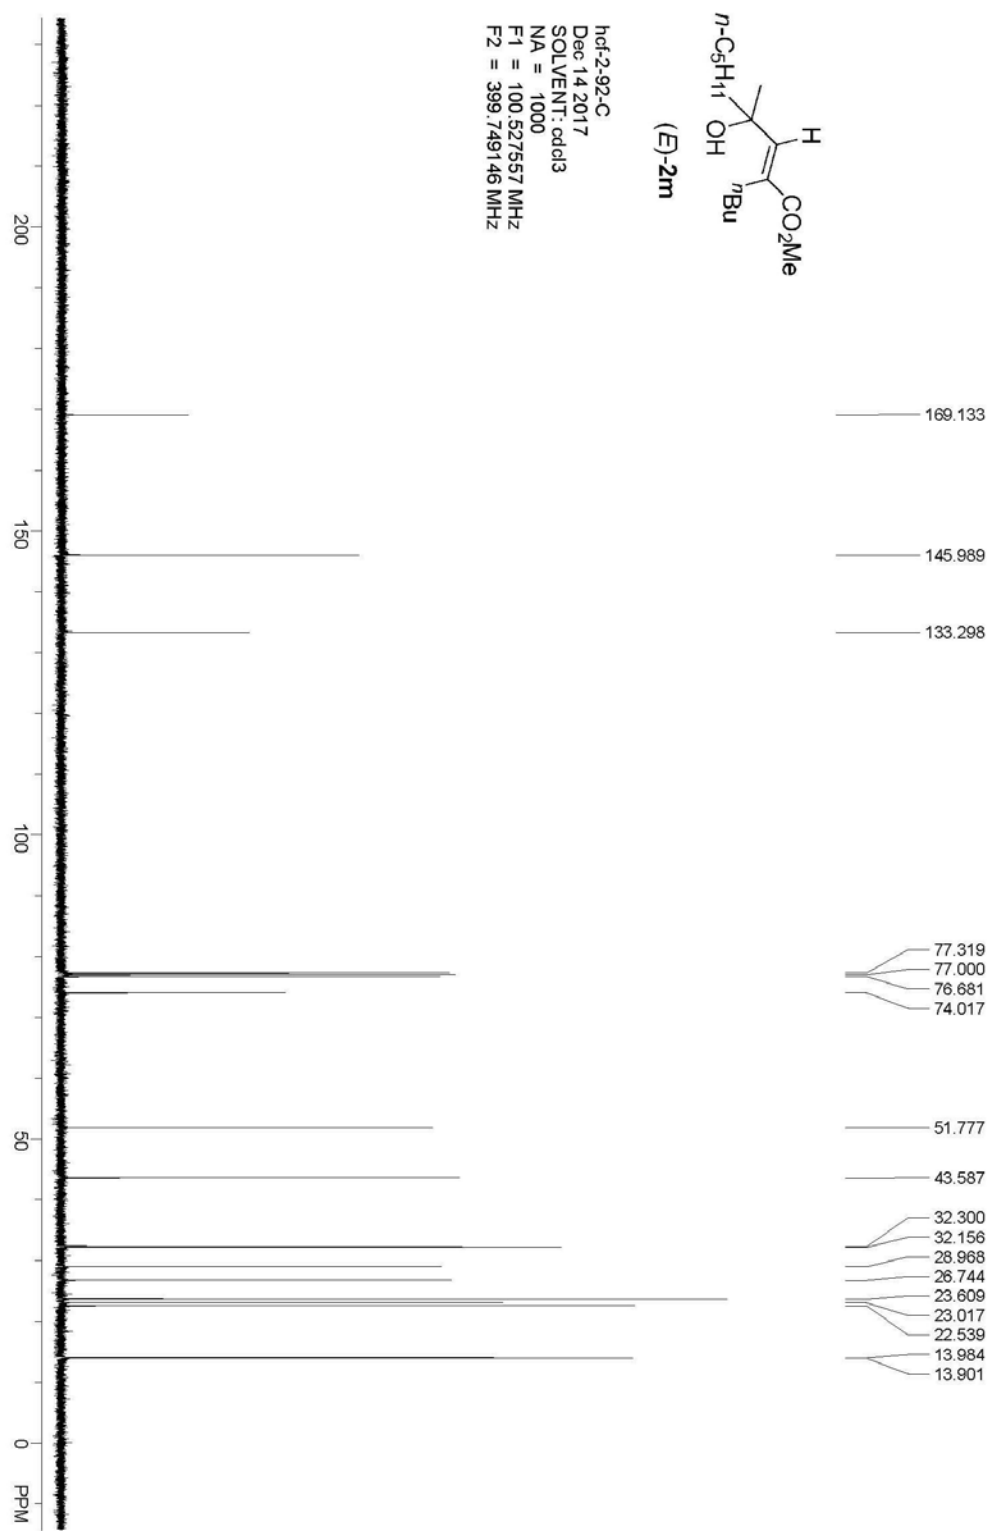

zvl-11-198-H  
Tue Oct 16 23:57:58 2018  
SOLVENT: CDCl3  
NA = 8  
F1 = 400.132477 MHz  
F2 = 1.000000 MHz

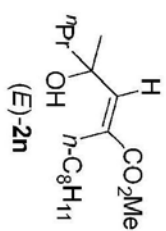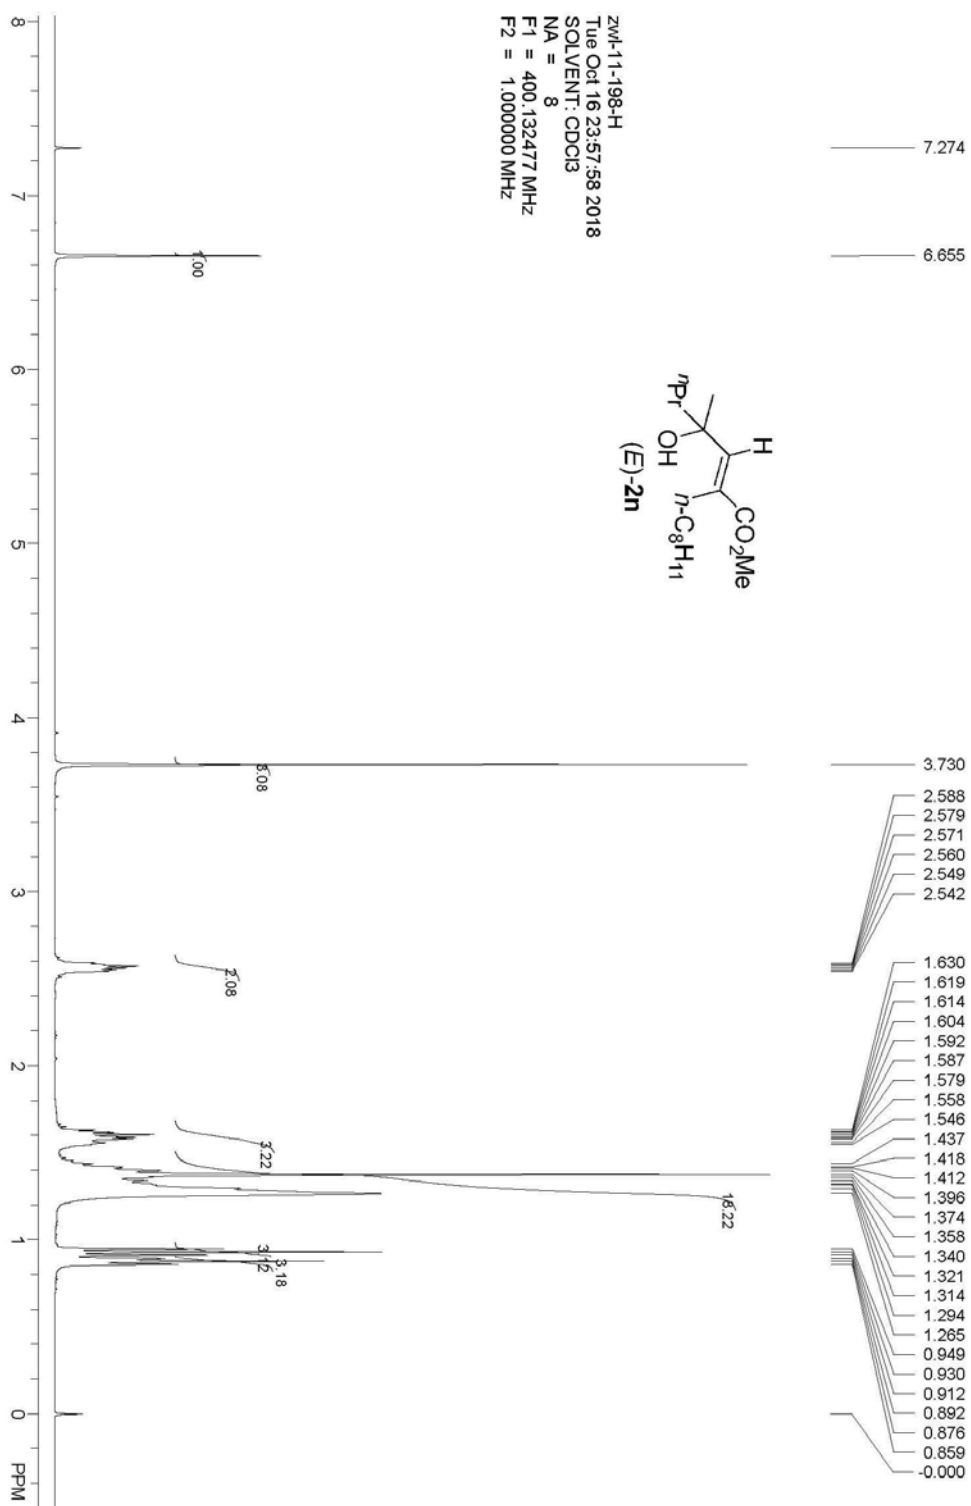

zwl-11-198-C  
Tue Oct 16 00:55:31 2018  
SOLVENT: CDCl3  
NA = 1024  
F1 = 100.623833 MHz  
F2 = 1.000000 MHz

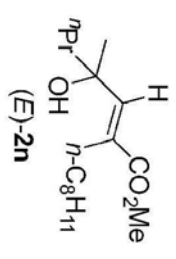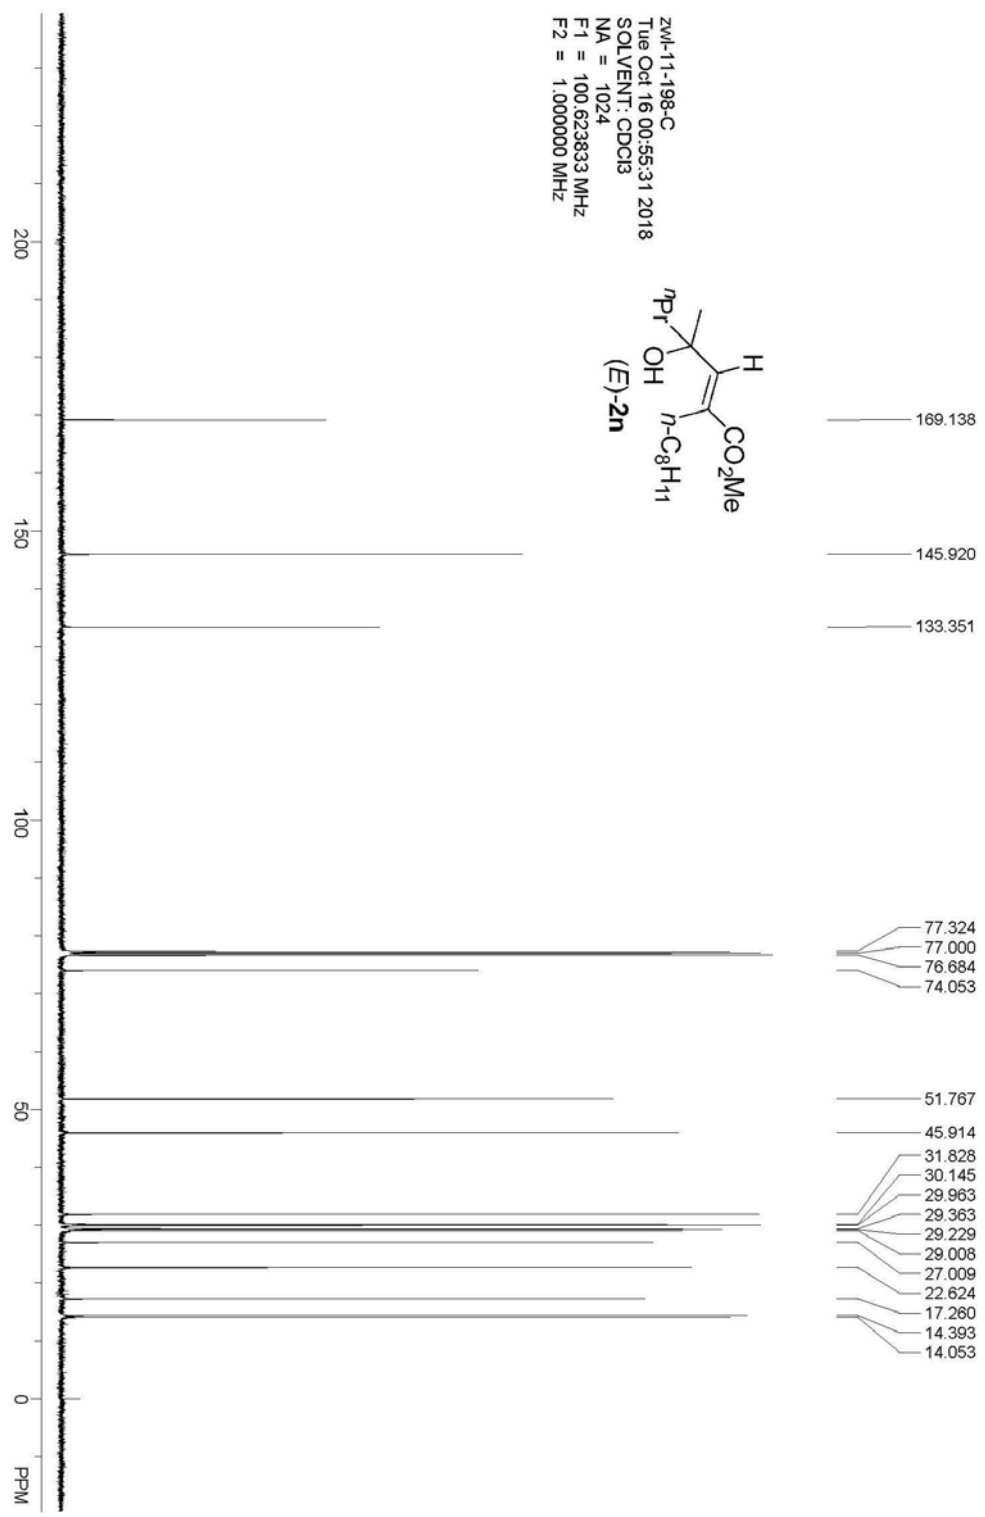

zwl-11-176-H  
 Thu Oct 04 00:59:06 2018  
 SOLVENT: CDCl3  
 NA = 8  
 F1 = 400.132477 MHz  
 F2 = 1.000000 MHz

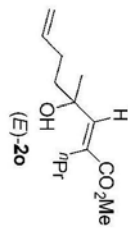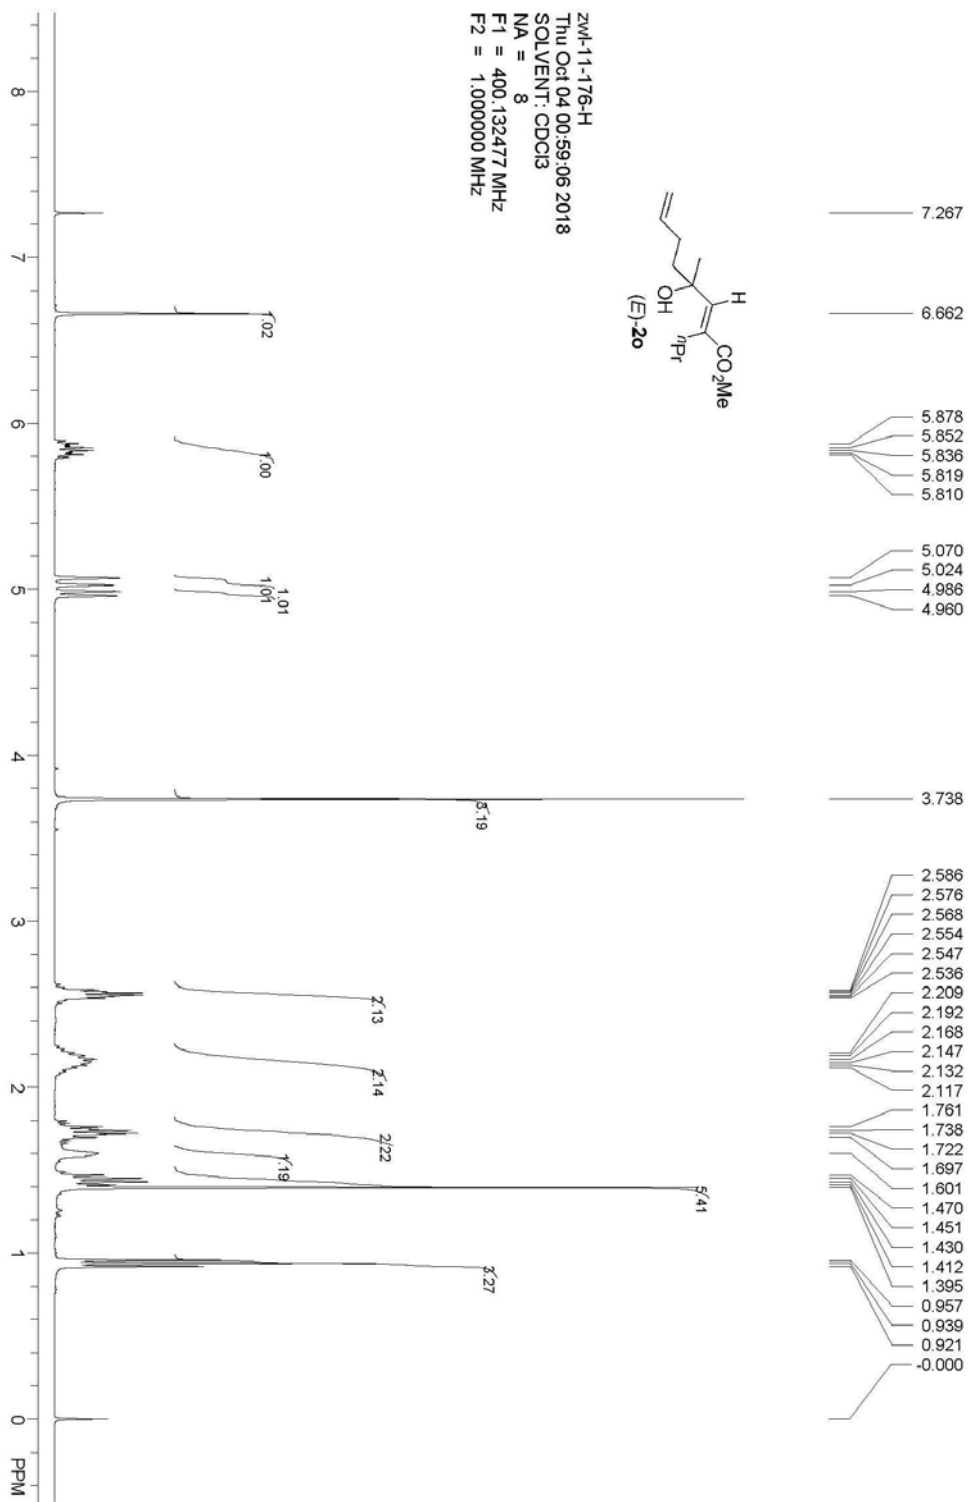



ZW-11-196-H  
 Tue Oct 23 15:10:56 2018  
 SOLVENT: CDCl3  
 NA = 4  
 F1 = 400.132477 MHz  
 F2 = 1.000000 MHz

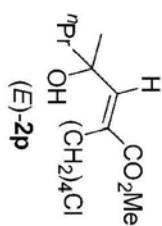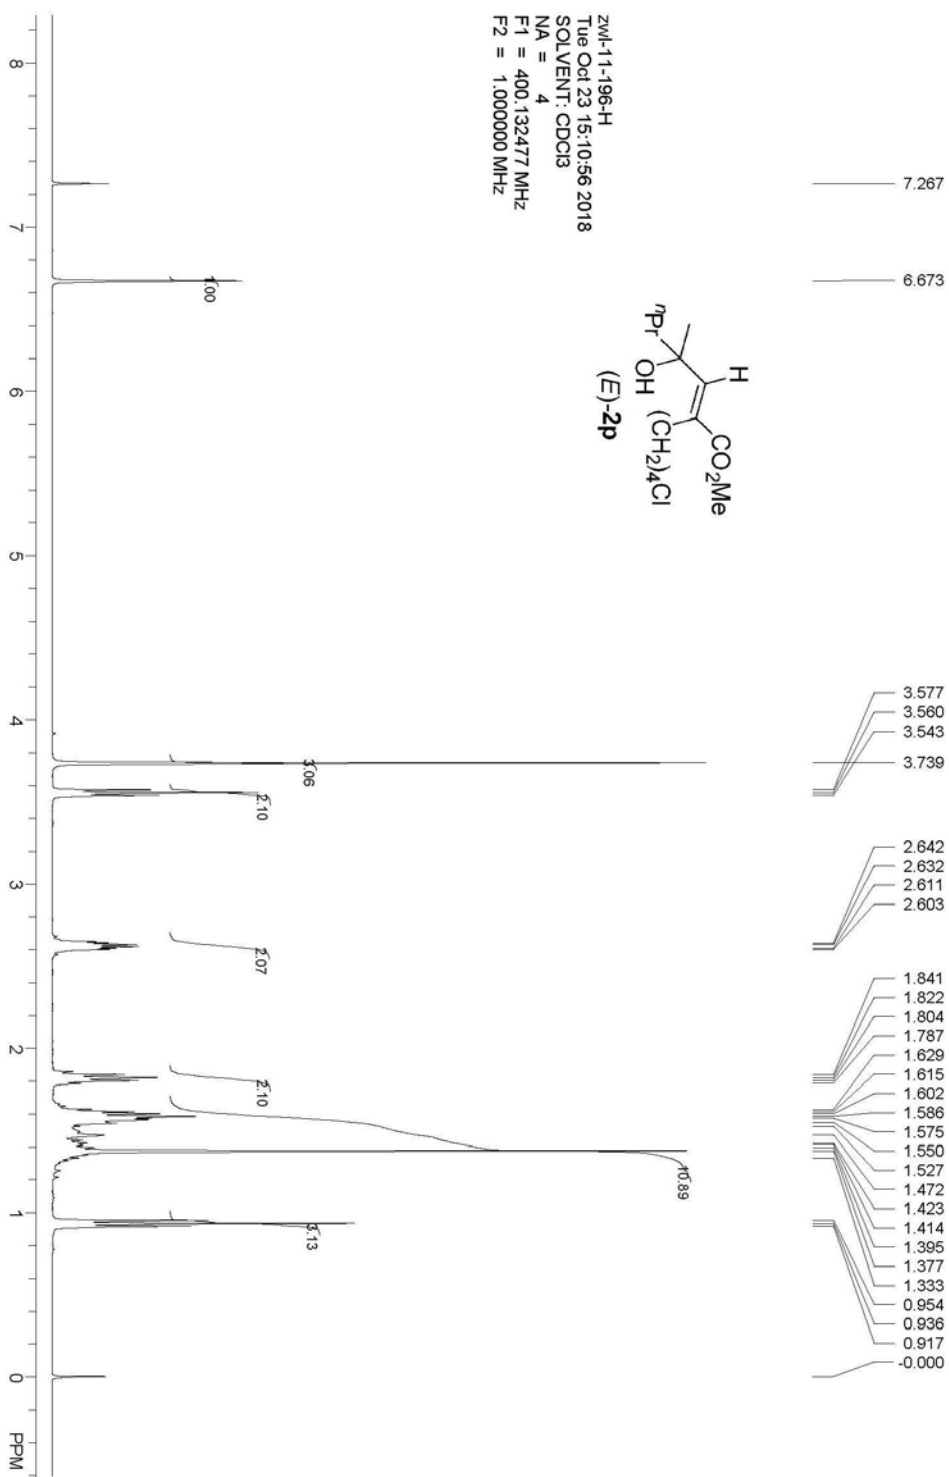

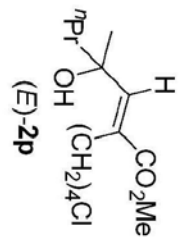

Zmh-11-196-C  
 Tue Oct 23 23:42:51 2018  
 SOLVENT: CDCl3  
 NA = 256  
 F1 = 100.623833 MHz  
 F2 = 1.000000 MHz

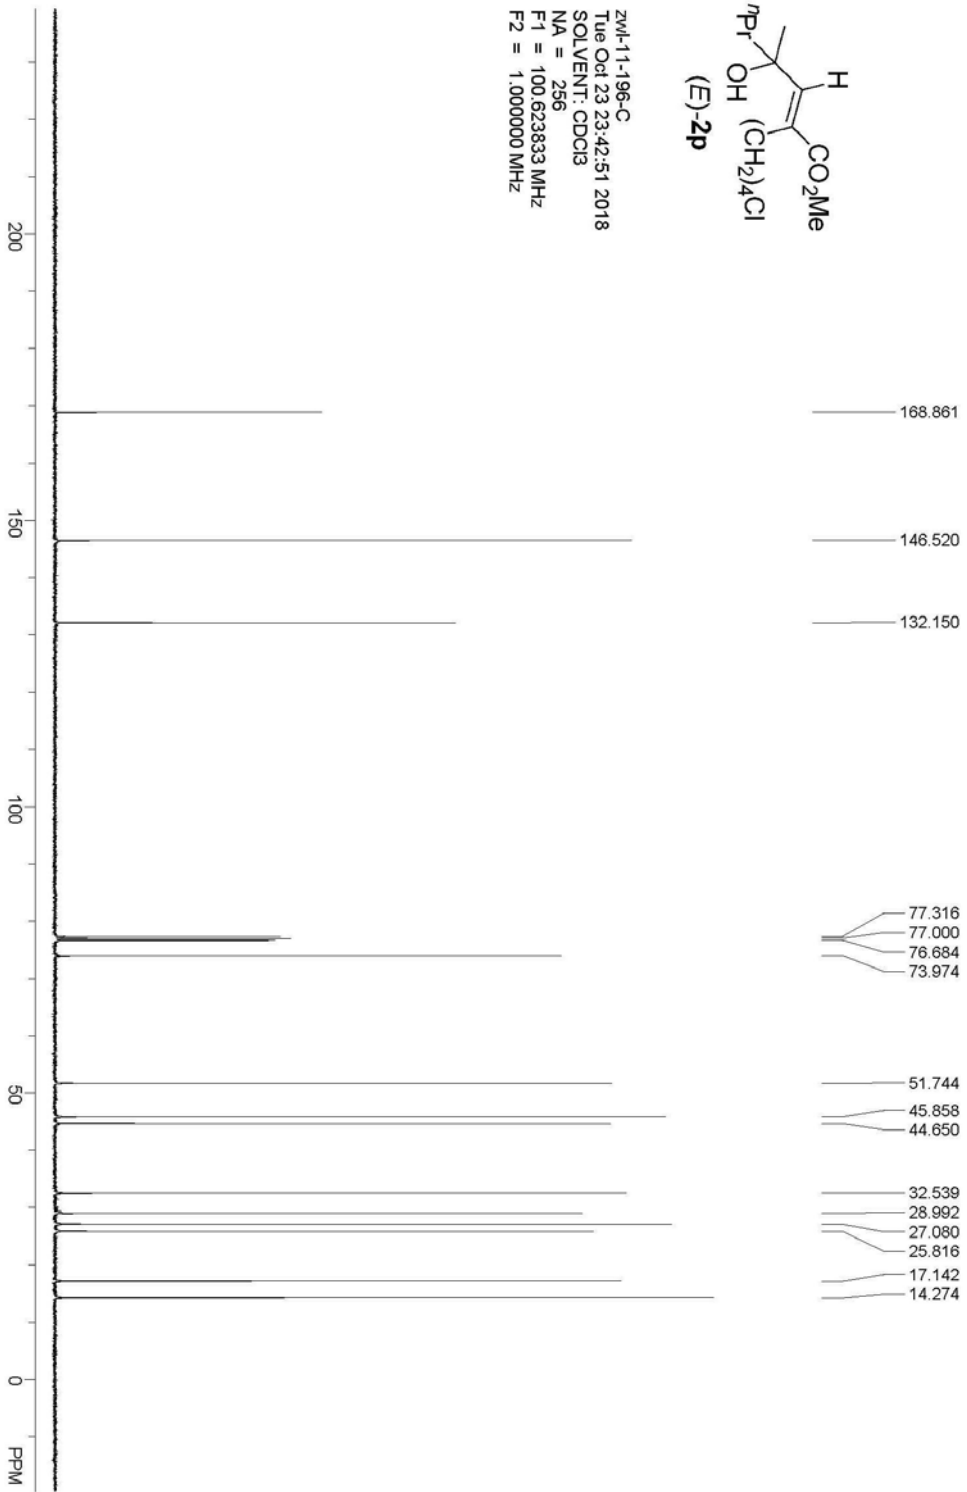

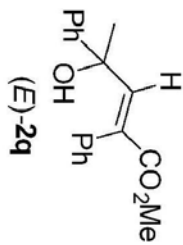

hrf-2-55-H  
 Nov 13 2017  
 SOLVENT: cdcl3  
 NA = 8  
 F1 = 399.749542 MHz  
 F2 = 100.526031 MHz

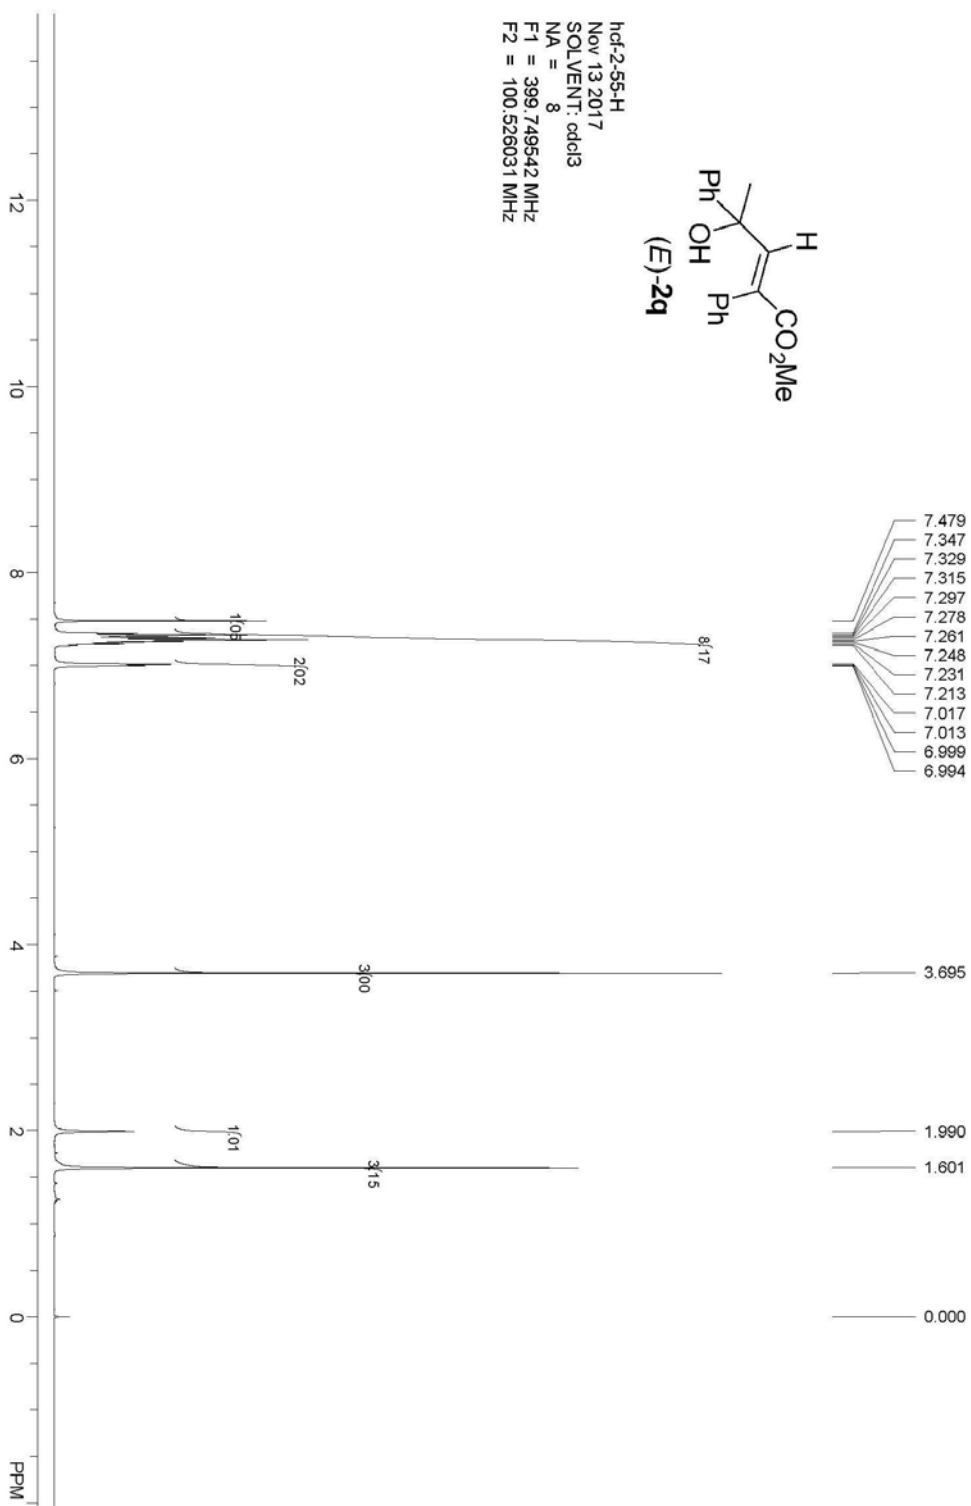



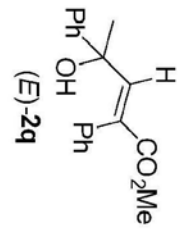

hcf-2-55-C  
 Nov 13 2017  
 SOLVENT: cdcl3  
 NA = 512  
 F1 = 100.527557 MHz  
 F2 = 399.749146 MHz

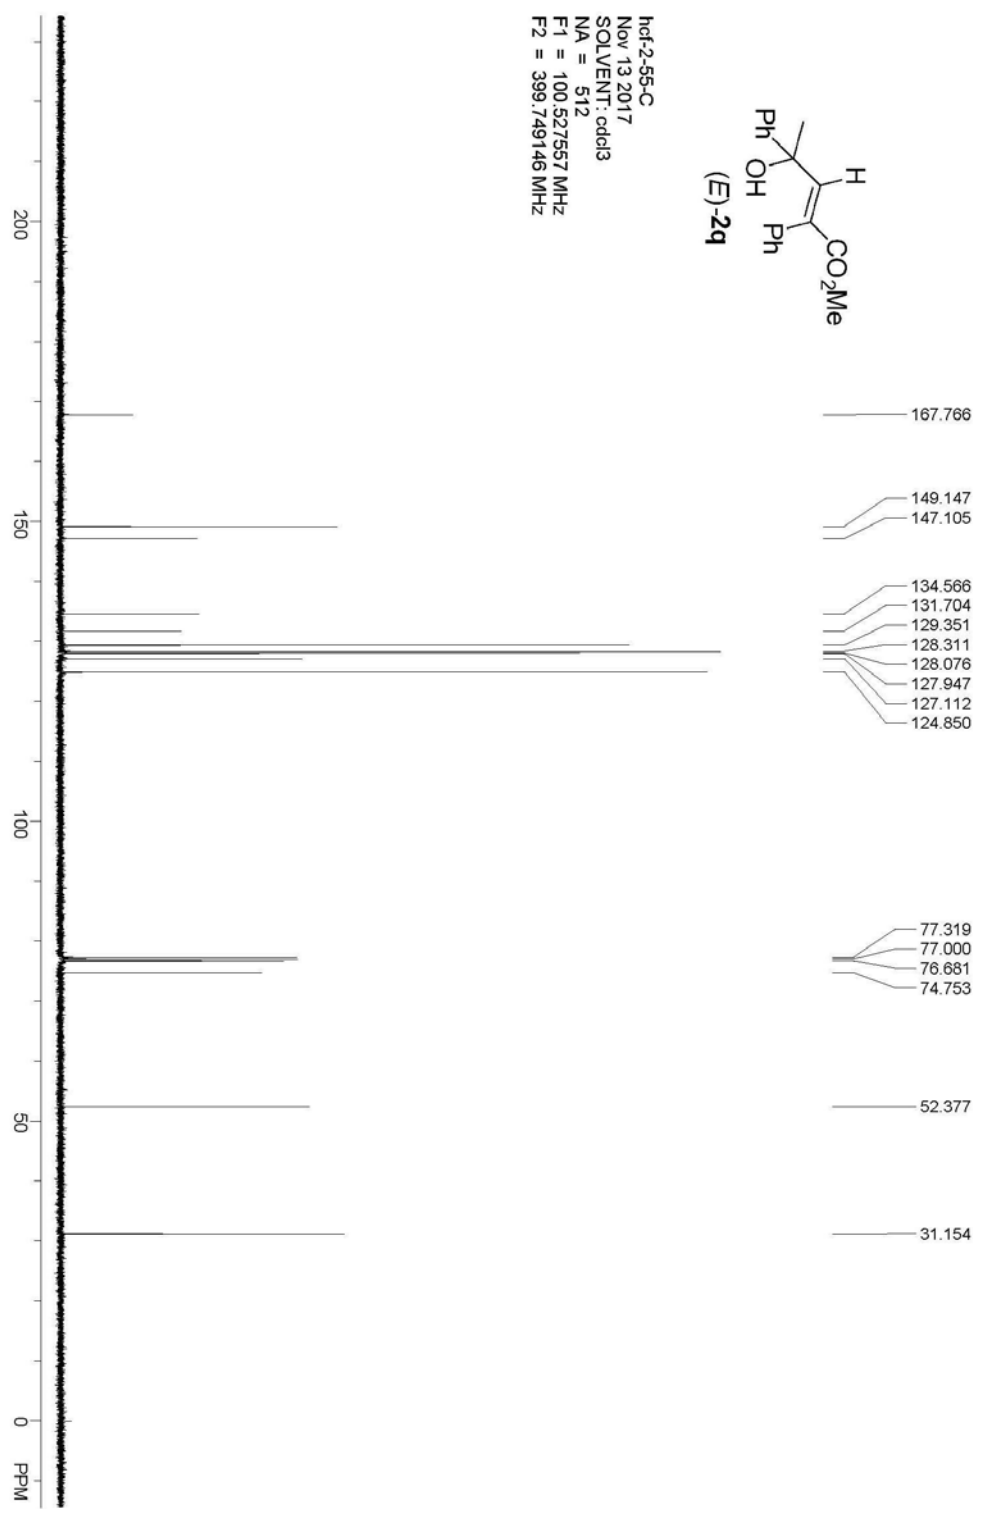

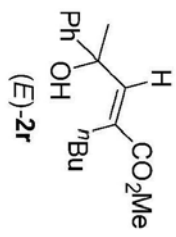

hnf-2-83-H  
 Dec 15 2017  
 SOLVENT: cdcl3  
 NA = 4  
 F1 = 399.749542 MHz  
 F2 = 100.526031 MHz

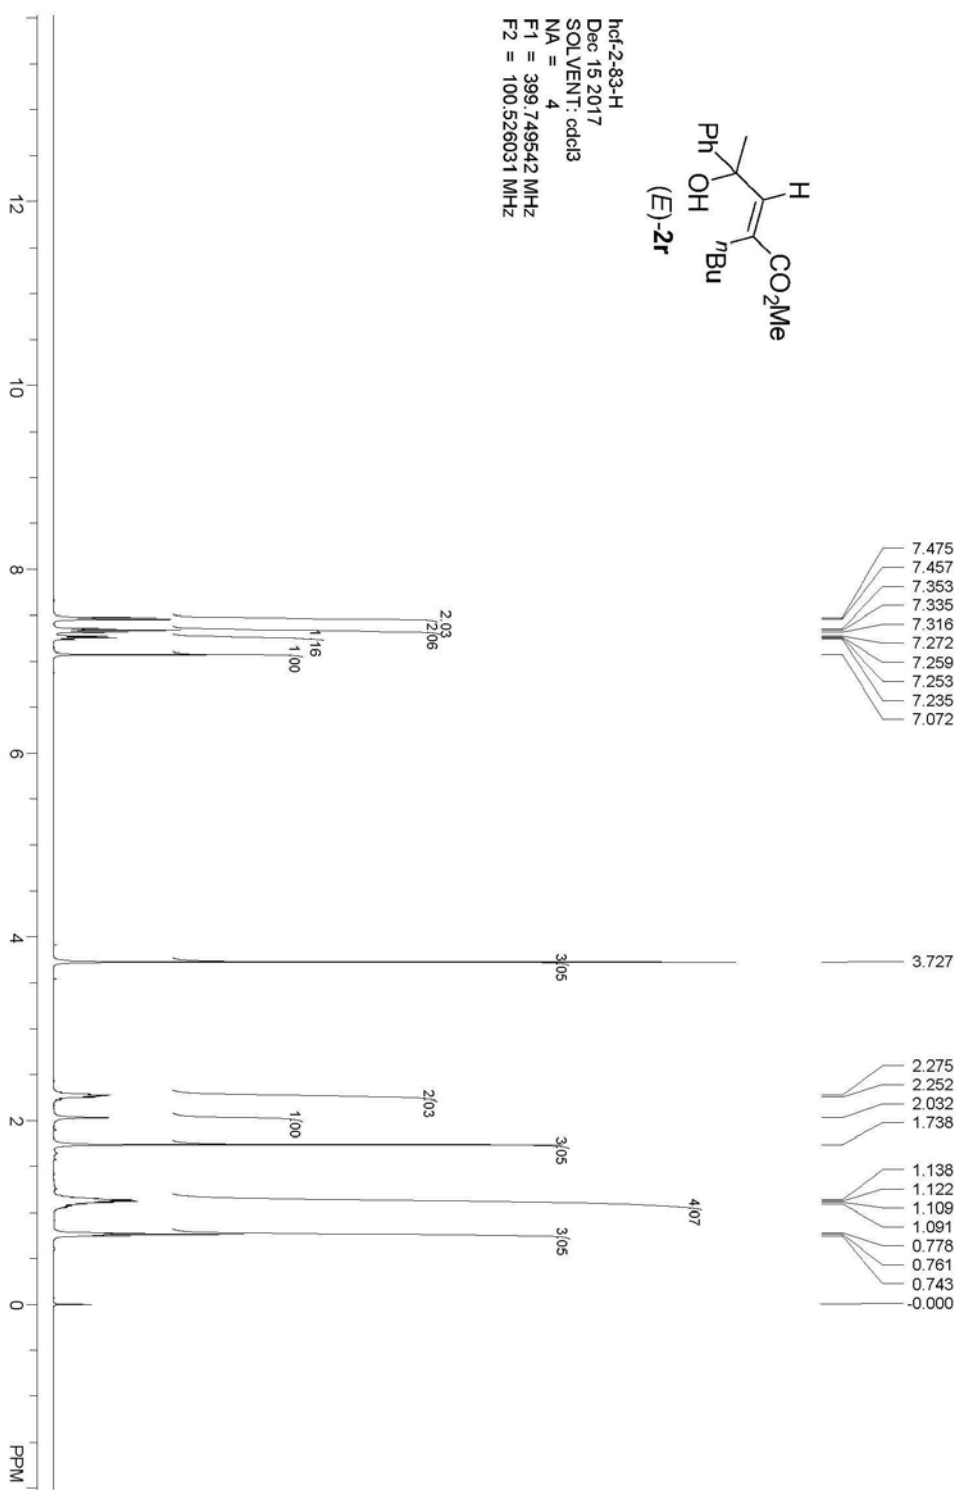

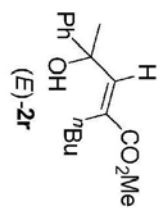

hcf-2-83-C  
 Dec 15 2017  
 SOLVENT: cdcl3  
 NA = 1000  
 F1 = 100.527557 MHz  
 F2 = 399.749146 MHz

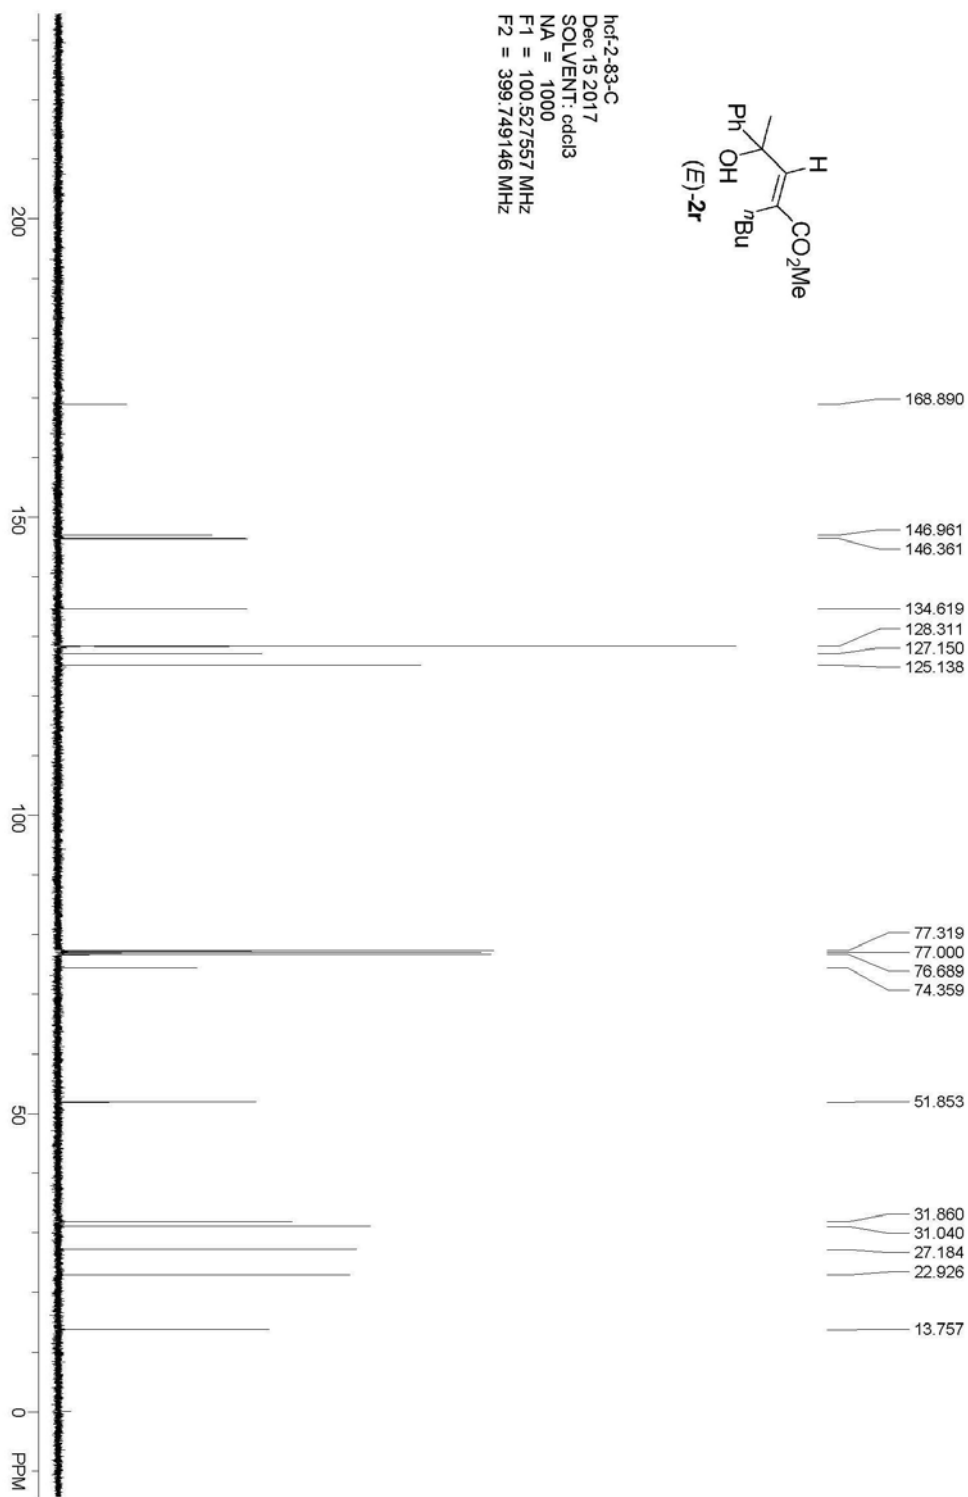

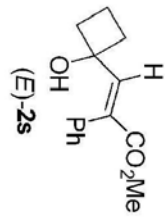

hcf-2-87-H  
 Dec 10 2017  
 SOLVENT: cdcl3  
 NA = 4  
 F1 = 399.749542 MHz  
 F2 = 100.526031 MHz

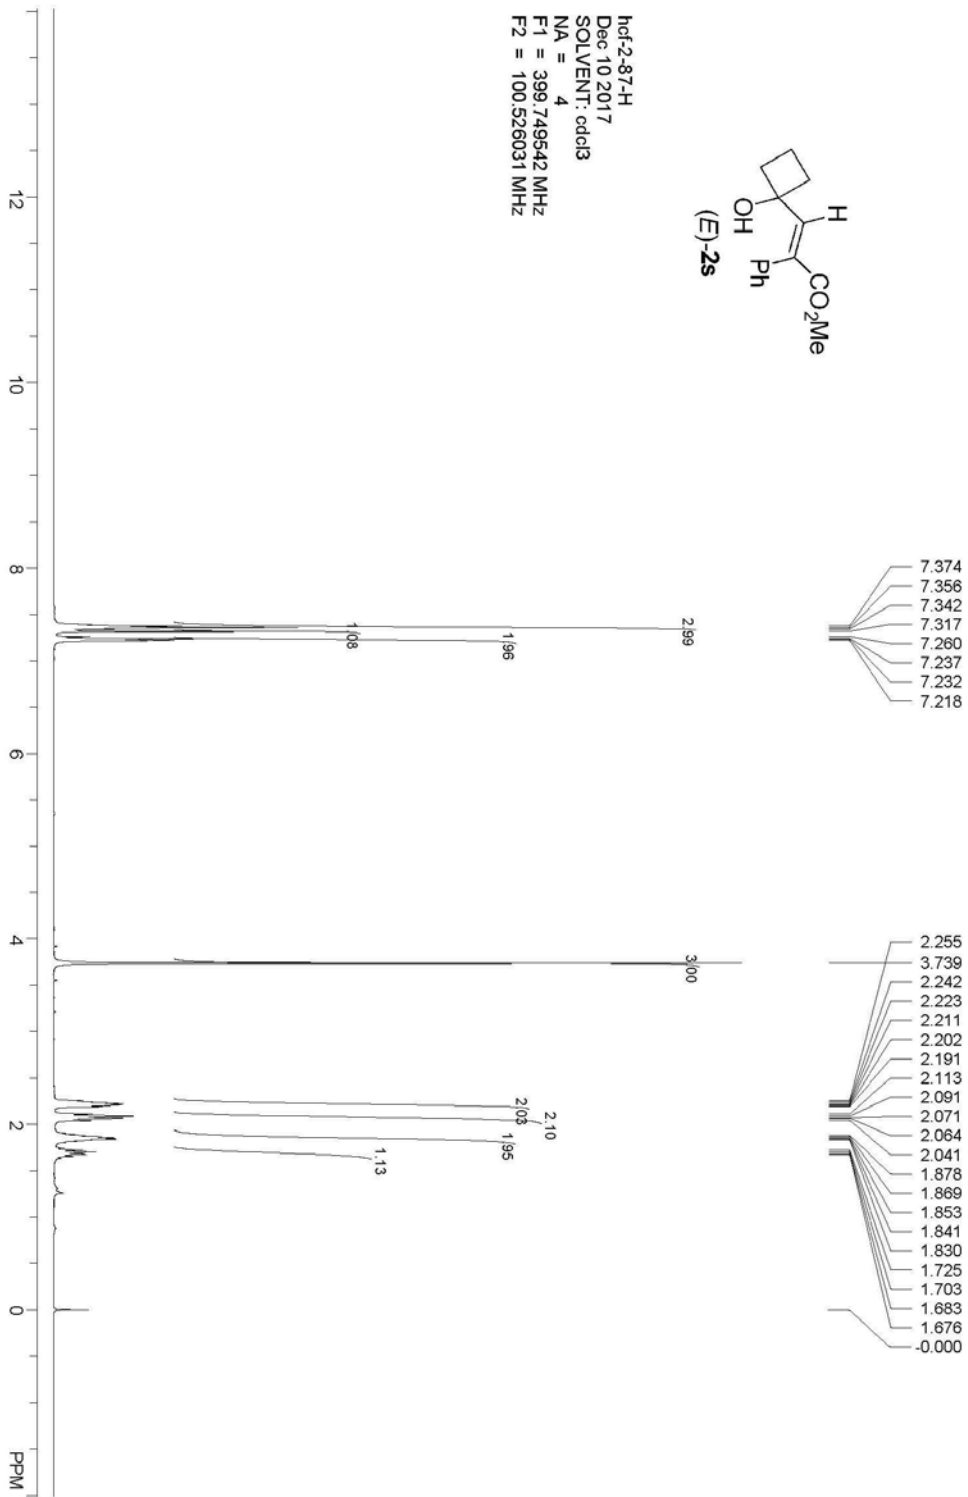

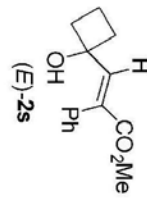

hcf-2-87-C  
 Dec 10 2017  
 SOLVENT: cdcl3  
 NA = 512  
 F1 = 100.527557 MHz  
 F2 = 399.749146 MHz

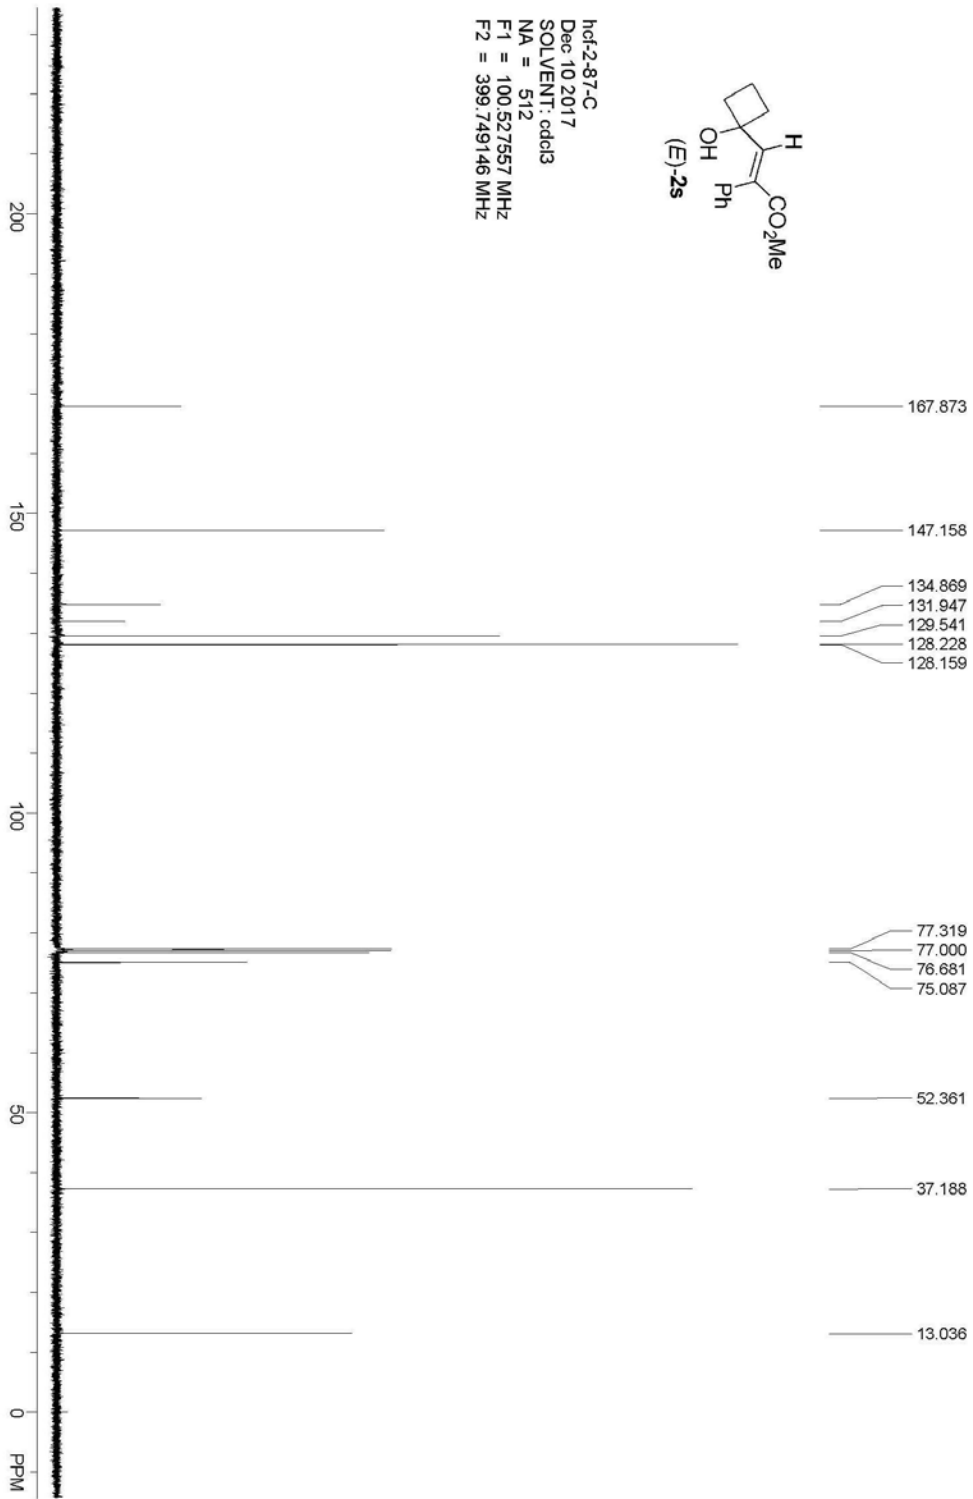

hcf-2-89-H  
Jan 6 2018  
SOLVENT: cdd3  
NA = 4  
F1 = 399.749542 MHz  
F2 = 100.526031 MHz

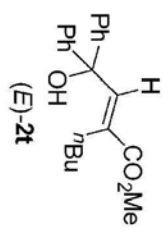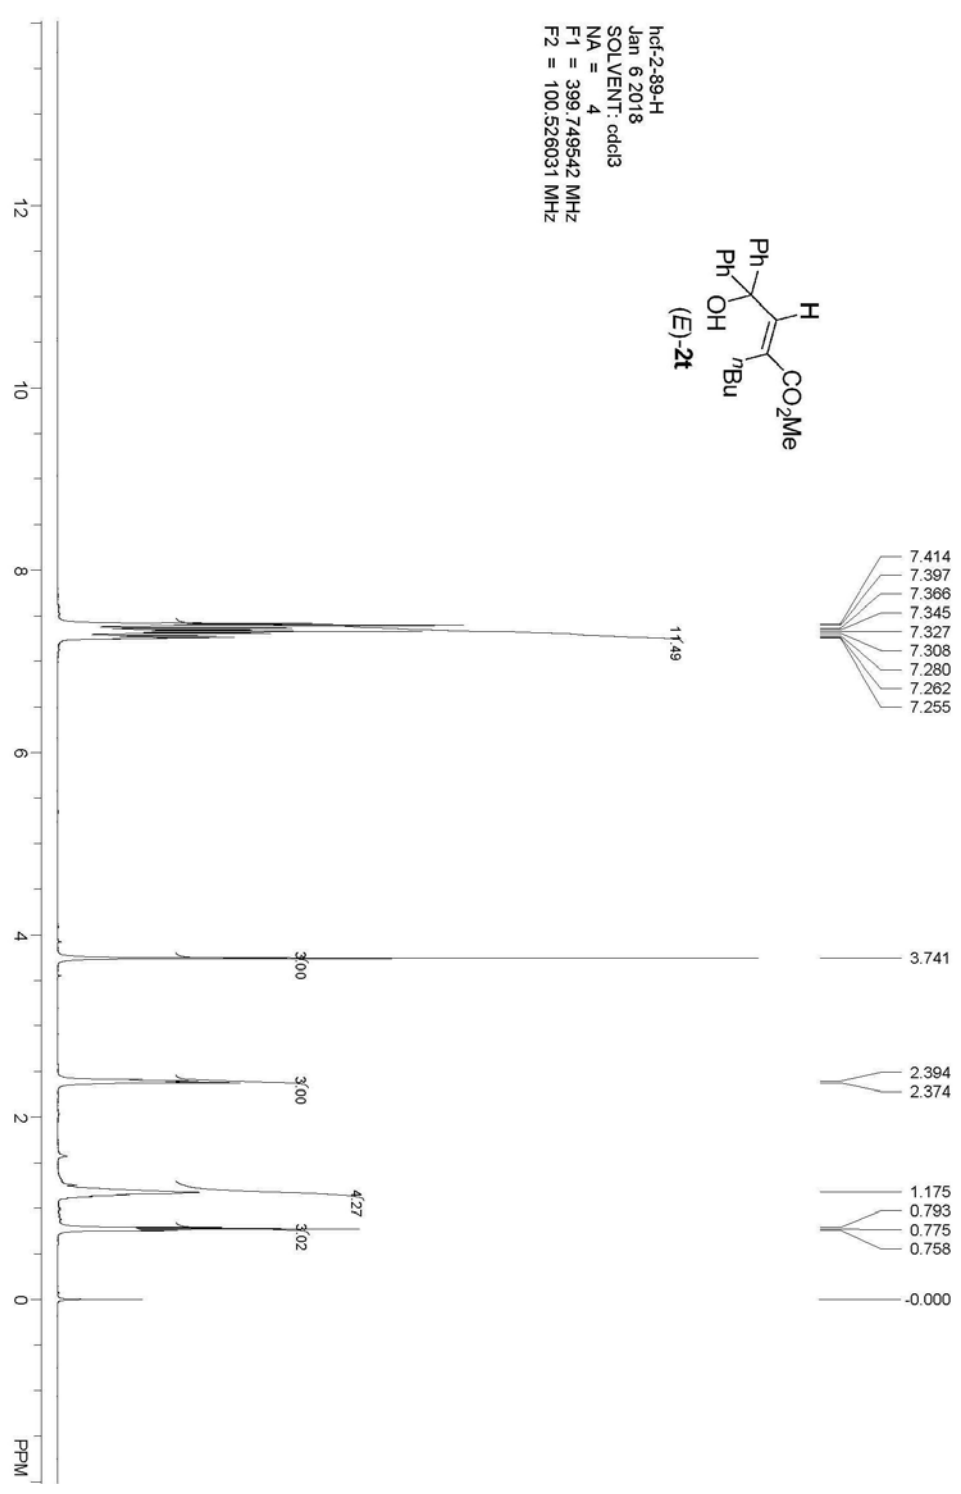

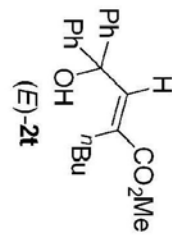

hcf-2-89-C  
Dec 14 2017  
SOLVENT: cdcl3  
NA = 512  
F1 = 100.527557 MHz  
F2 = 399.749146 MHz

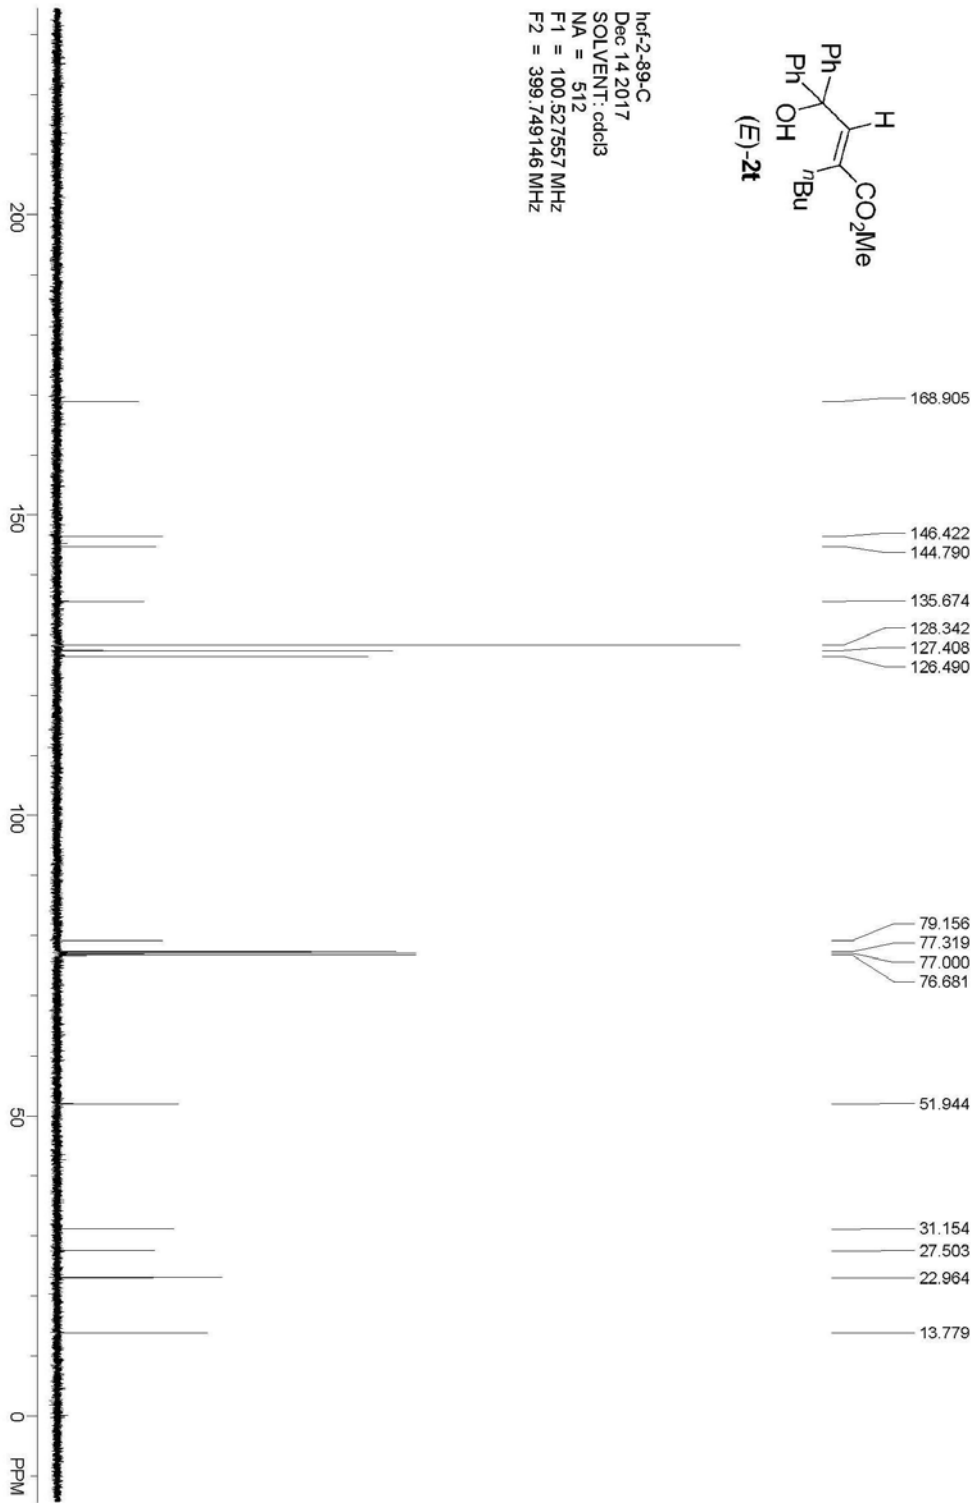

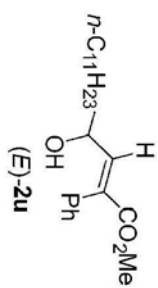

hof-2-79-H  
 Dec 7 2017  
 SOLVENT: cdcl3  
 NA = 8  
 F1 = 399.749542 MHz  
 F2 = 100.526031 MHz

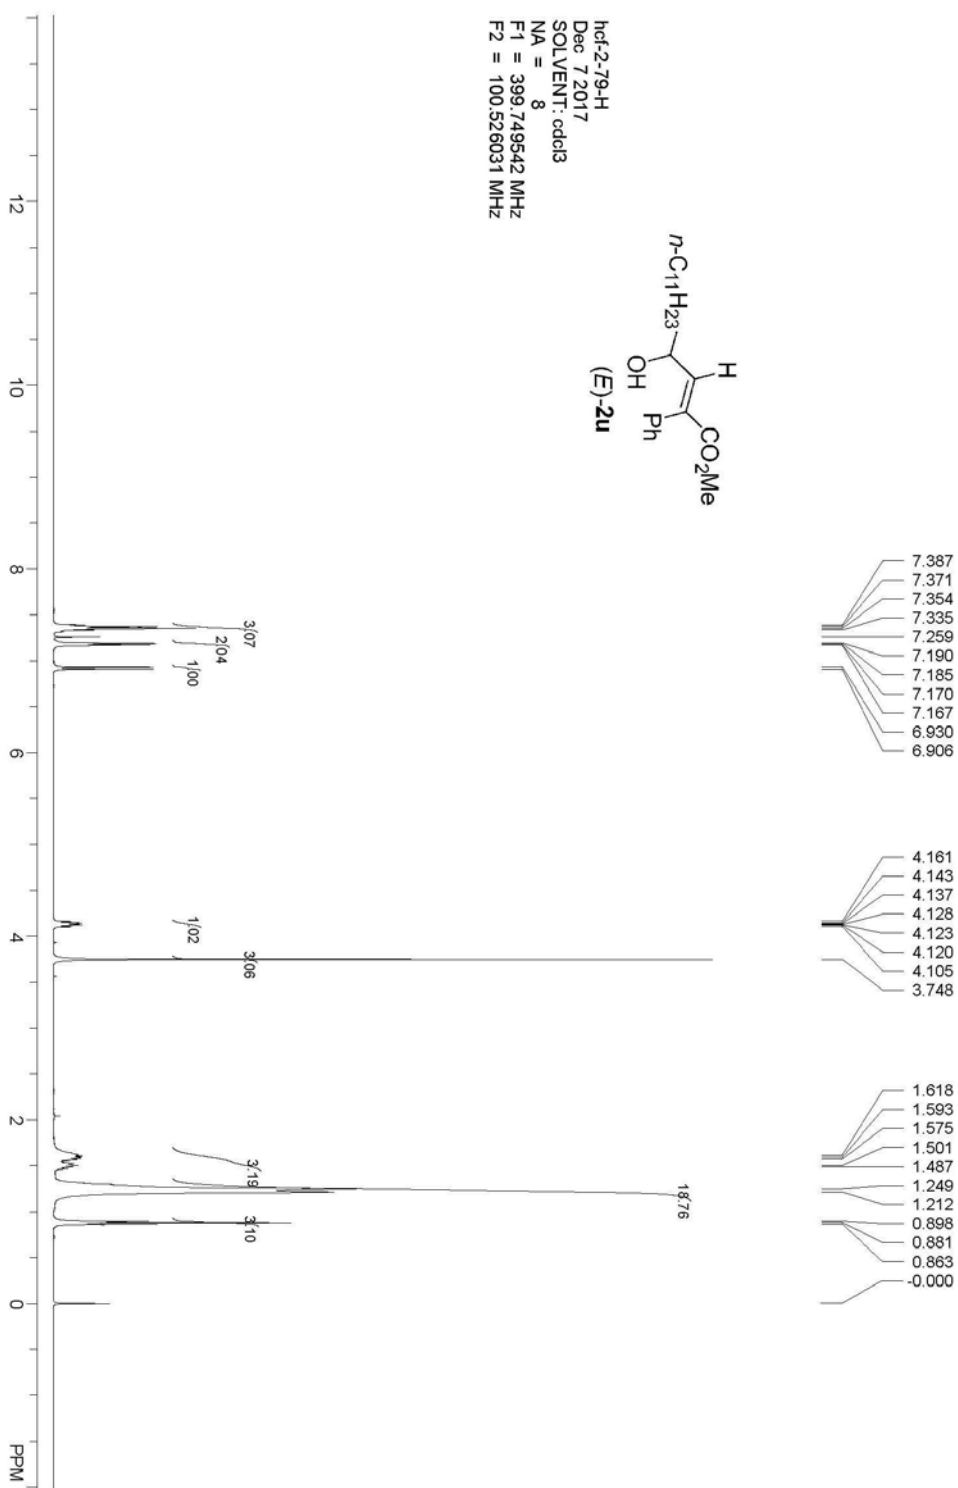



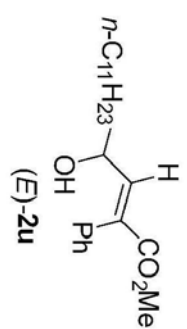

hof-2-79-C  
 Dec 7 2017  
 SOLVENT: cdcl3  
 NA = 1000  
 F1 = 100.527557 MHz  
 F2 = 399.749146 MHz

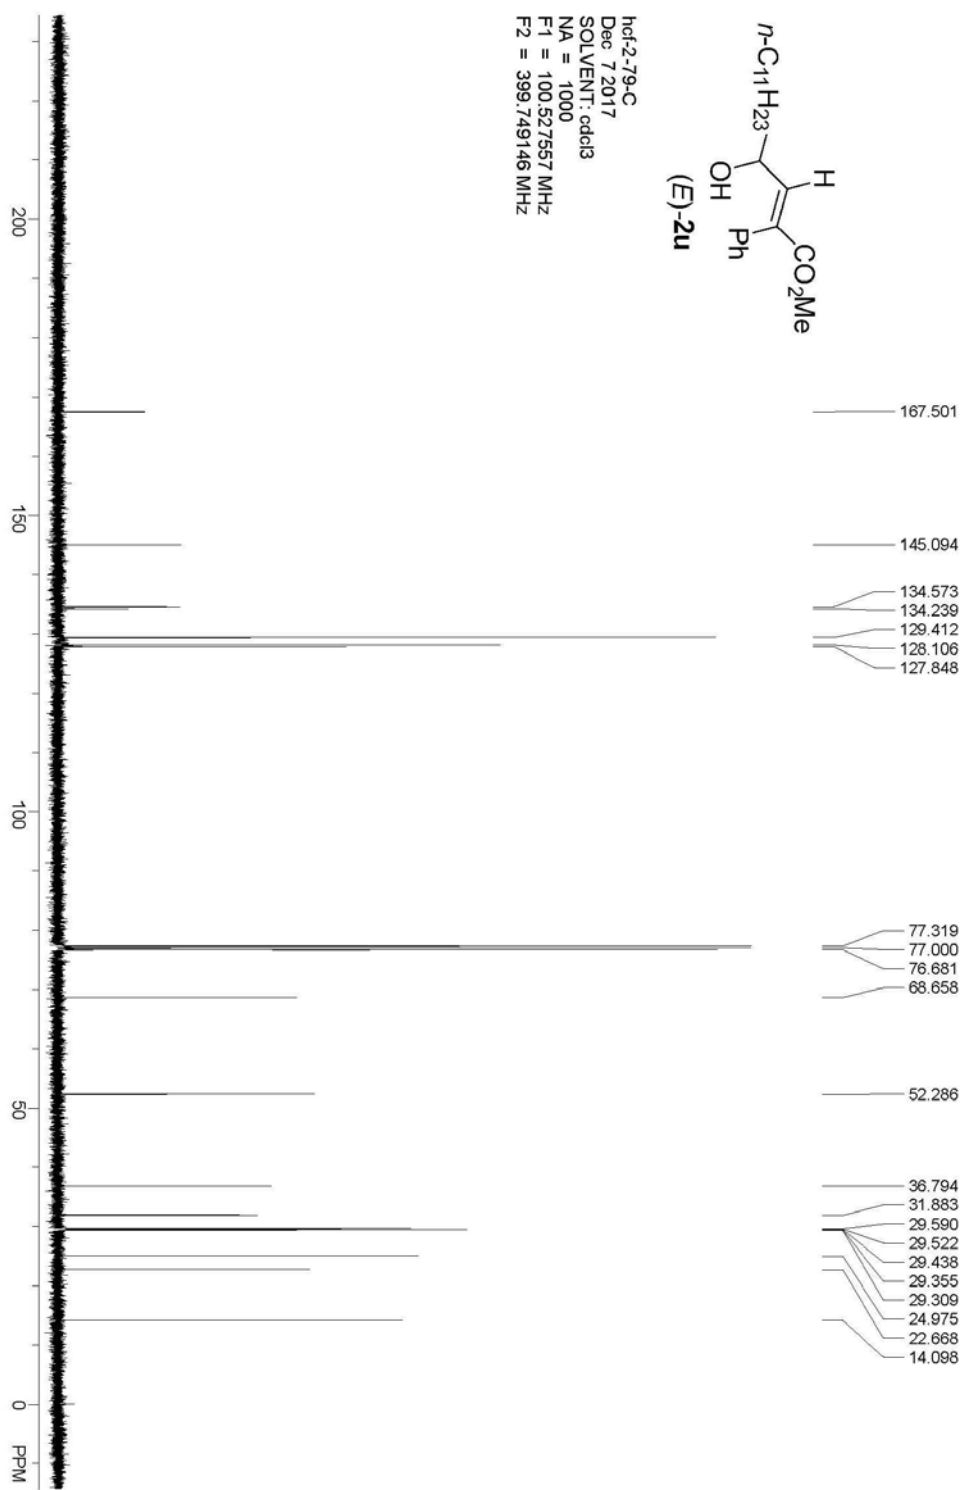

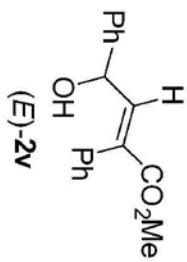

hcf-2-125-H  
 Jan 26 2018  
 SOLVENT: cdcl3  
 NA = 4  
 F1 = 399.749542 MHz  
 F2 = 100.526031 MHz

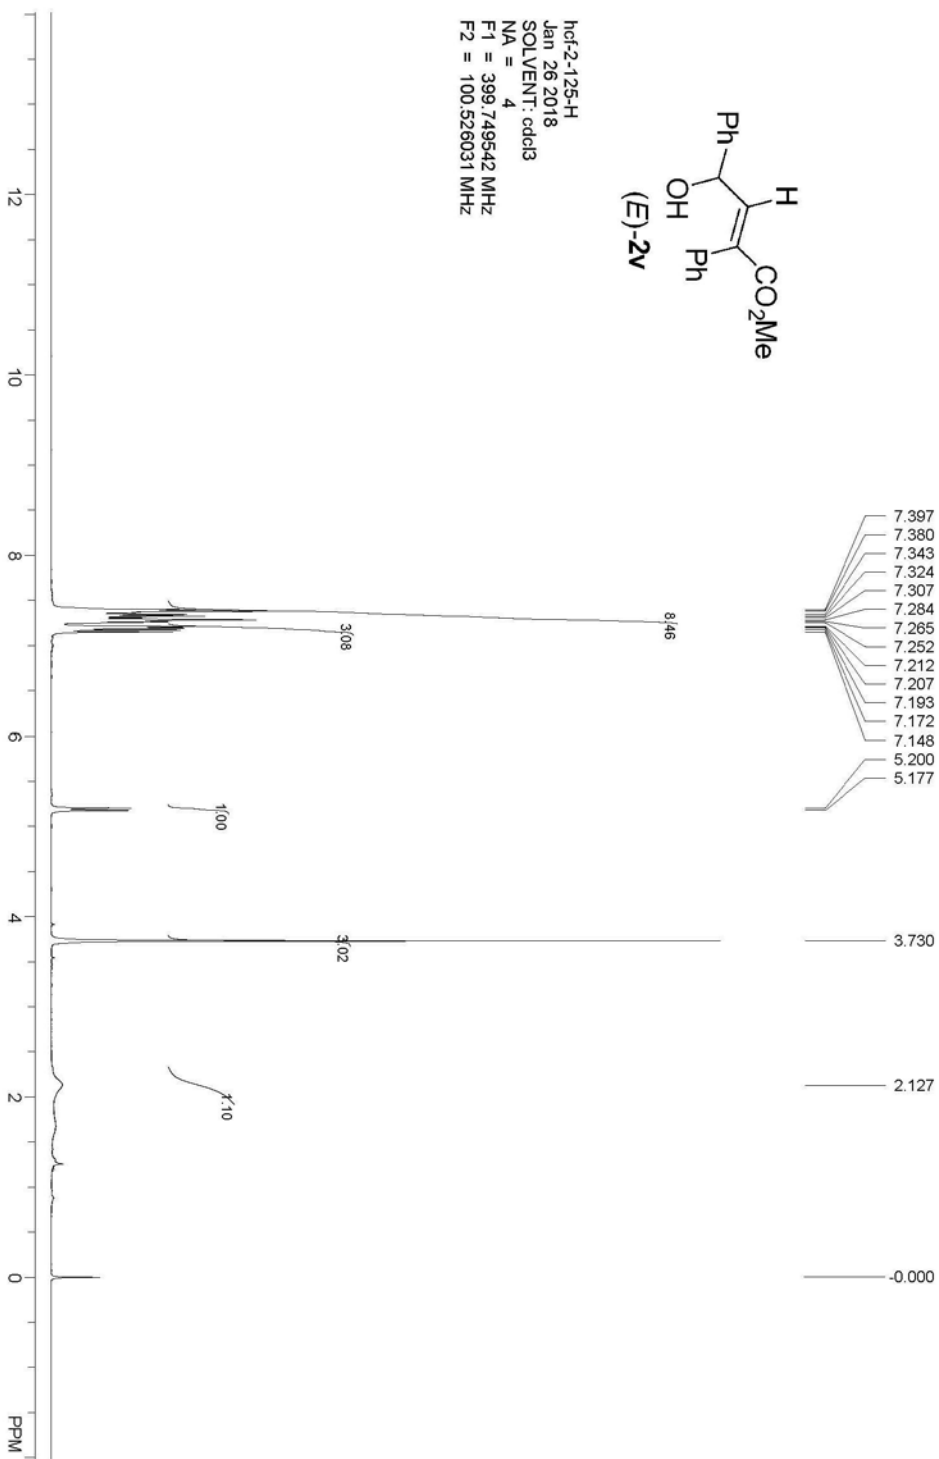

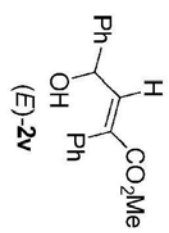

hcf-2-125-C  
 Jan 26 2018  
 SOLVENT: cdcl3  
 NA = 512  
 F1 = 100.527557 MHz  
 F2 = 399.749146 MHz

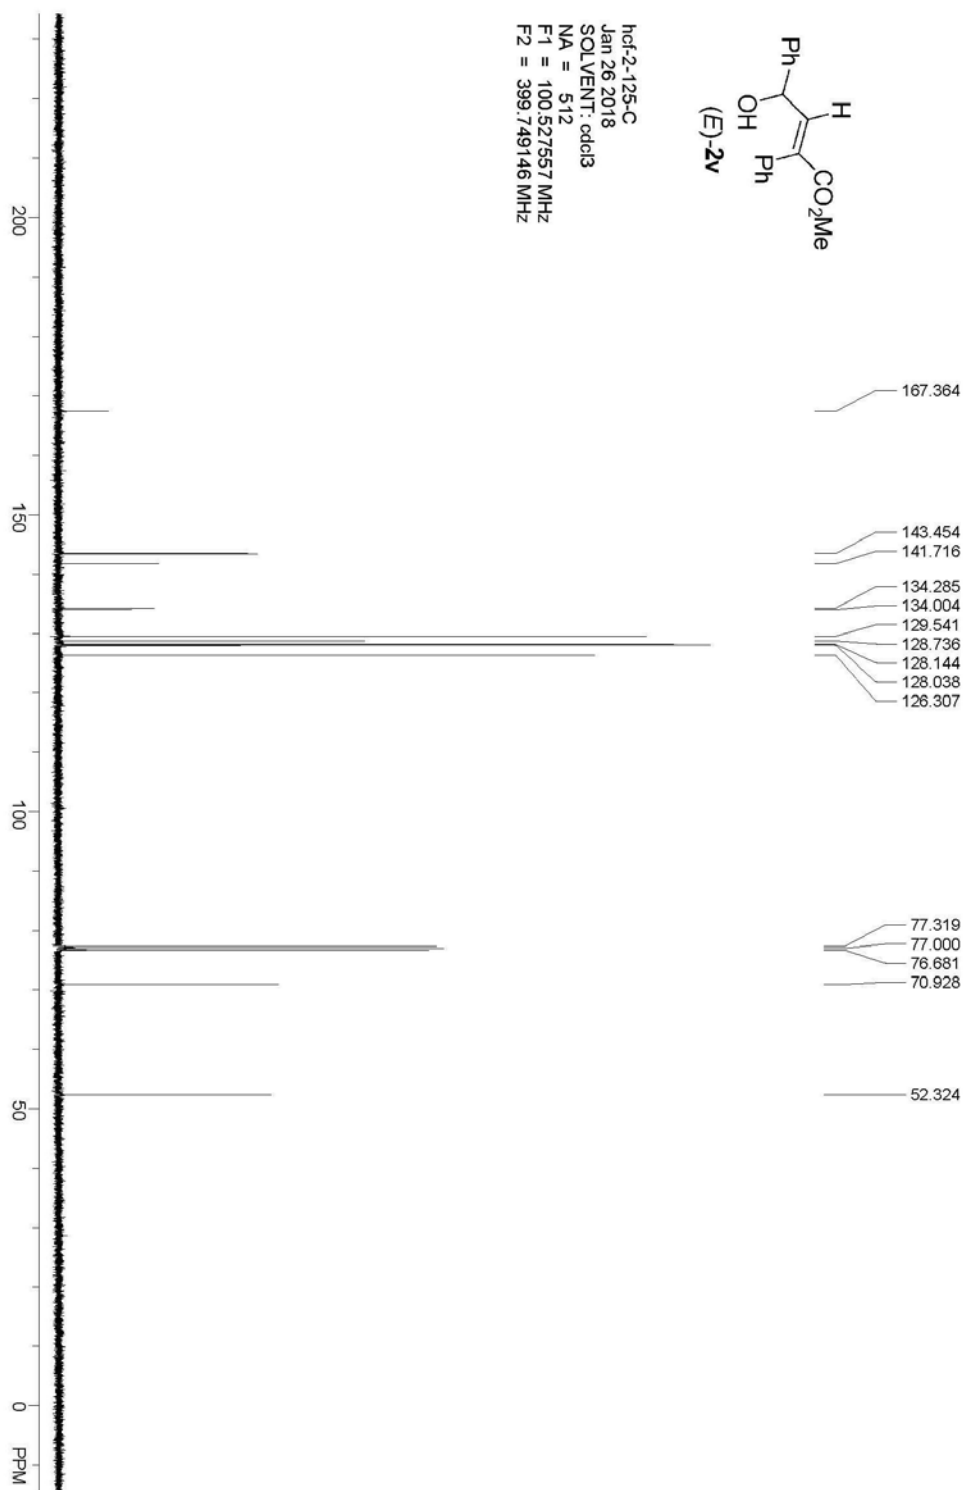

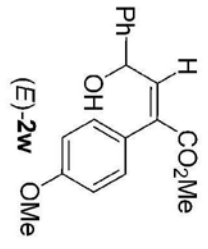

hcf-2-126-H  
 Jan 26 2018  
 SOLVENT: cdcl3  
 NA = 8  
 F1 = 399.749542 MHz  
 F2 = 100.526031 MHz

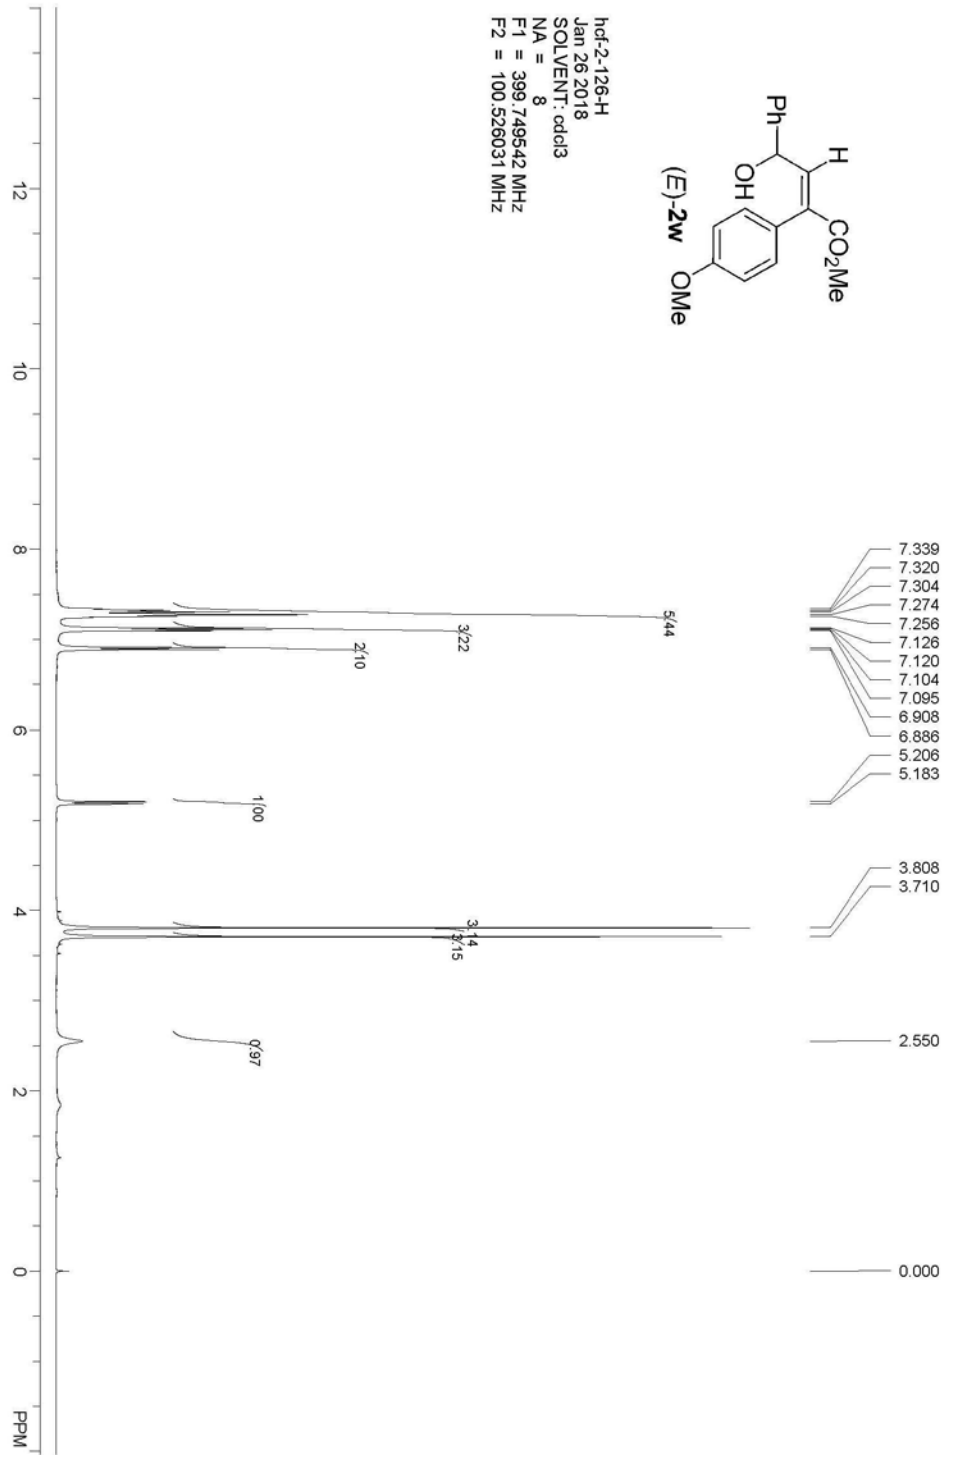

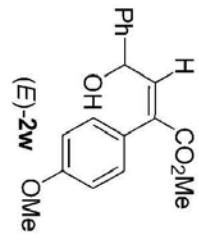

hdf-2-126-C  
Jan 29 2018  
SOLVENT: cdcl3  
NA = 512  
F1 = 100.527557 MHz  
F2 = 399.749146 MHz

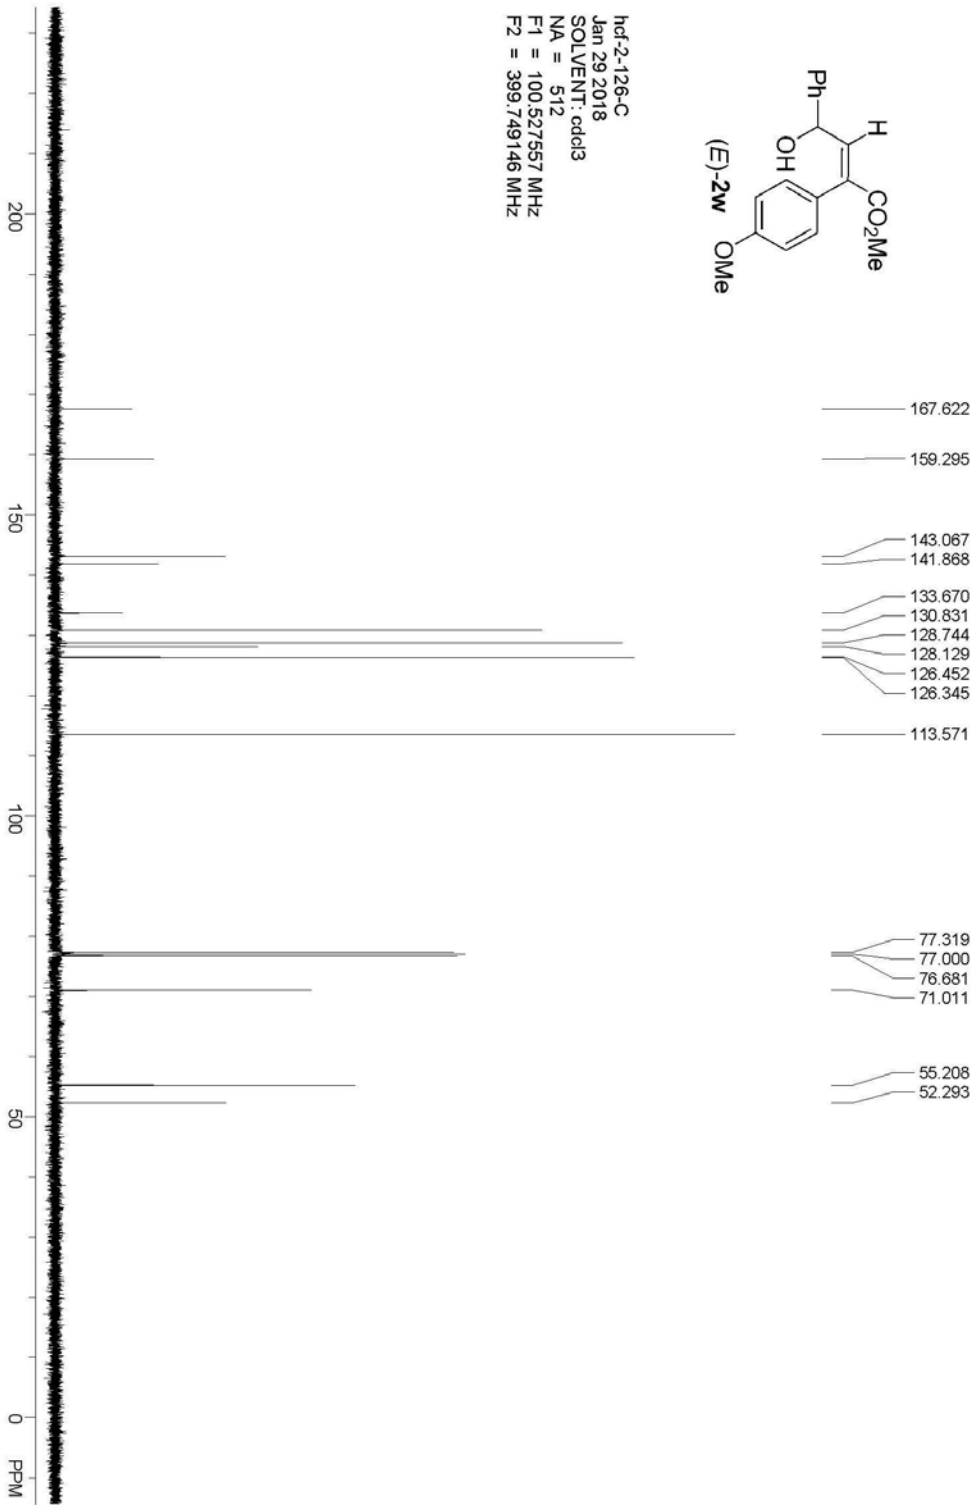

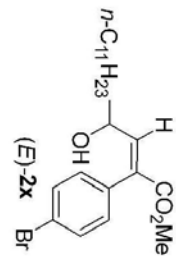

hcf-2-114-H  
 Jan 20 2018  
 SOLVENT: cdcl3  
 NA = 4  
 F1 = 399.749542 MHz  
 F2 = 100.526031 MHz

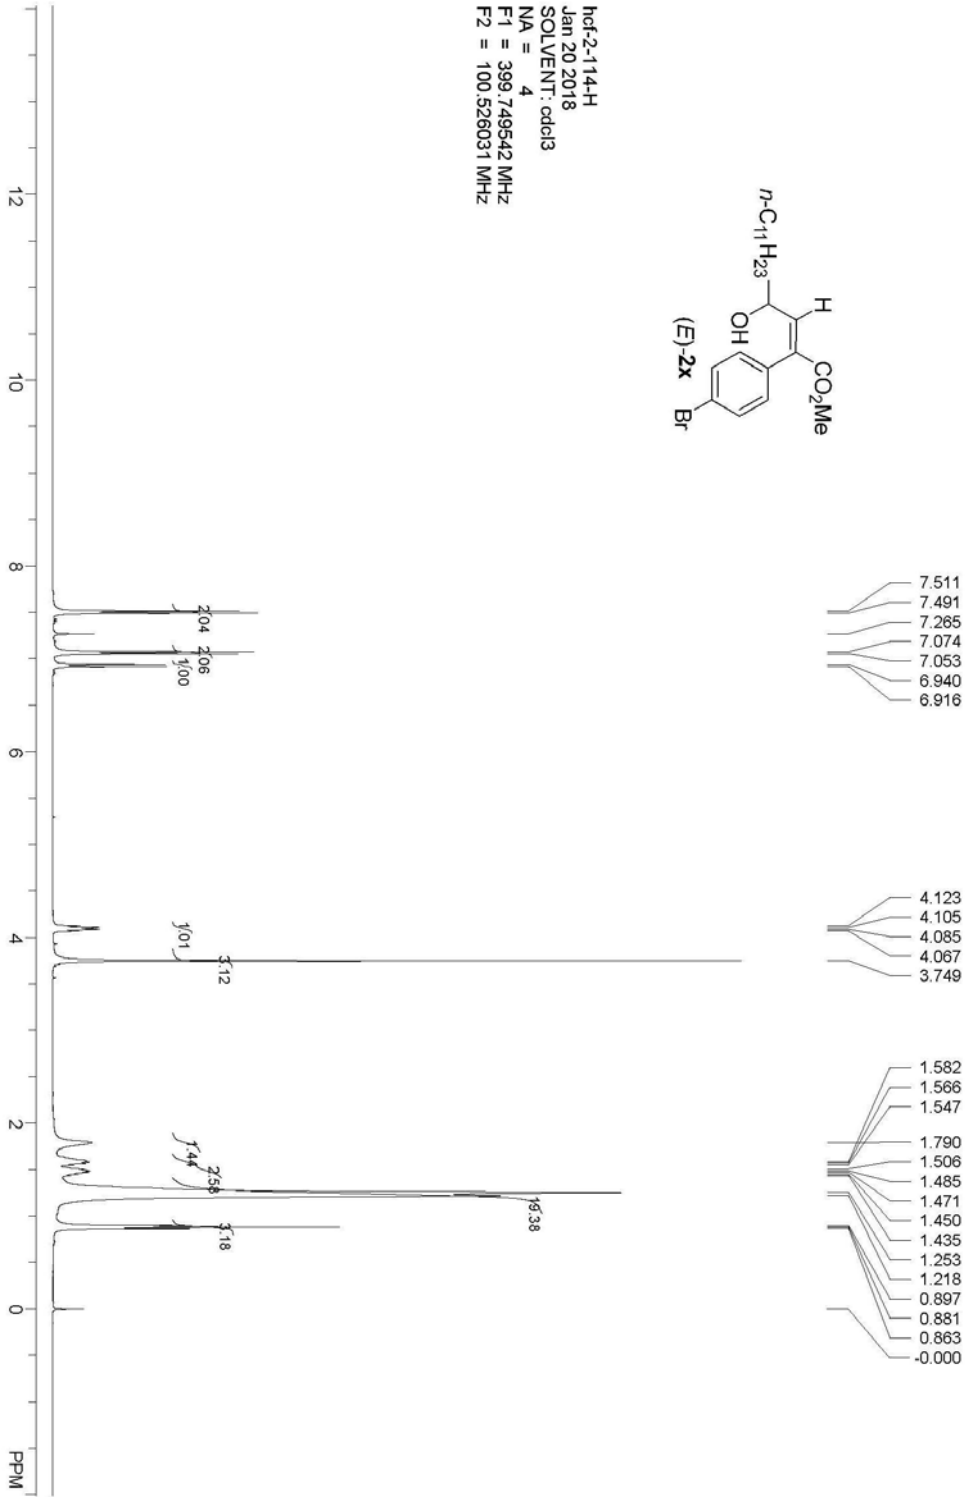

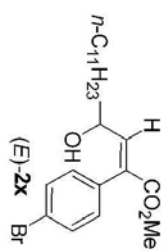

hcf-2-114-C  
 Jan 20 2018  
 SOLVENT: cdcl3  
 NA = 512  
 F1 = 100.527557 MHz  
 F2 = 399.749146 MHz

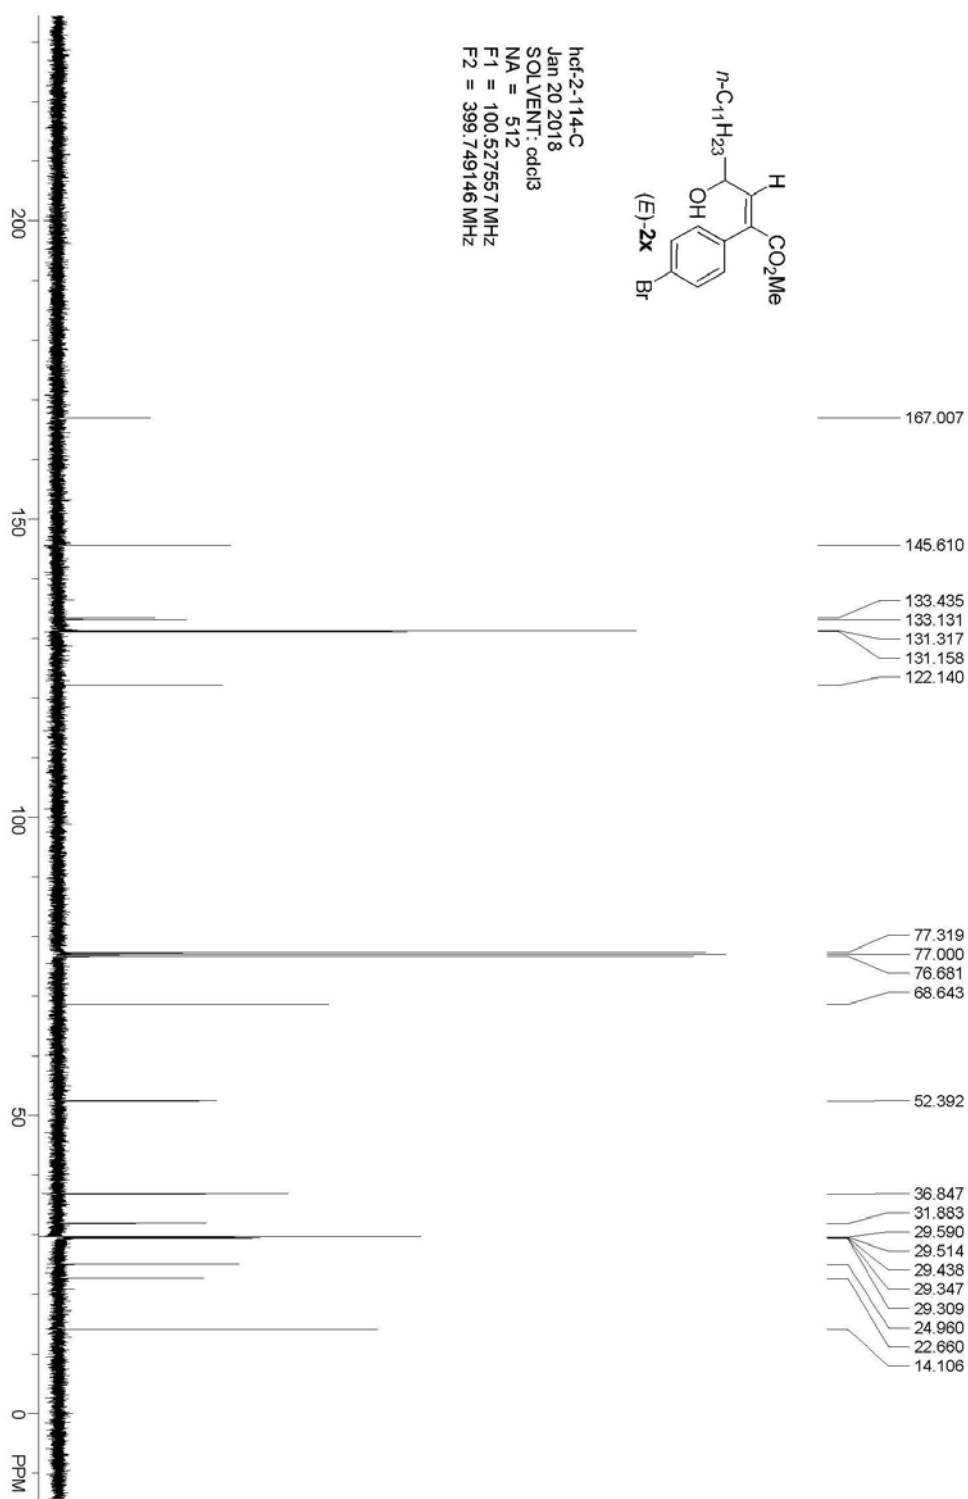

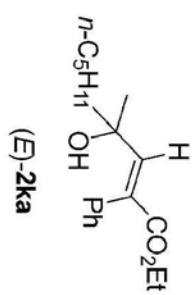

hcf-2-76-H  
 Dec 5 2017  
 SOLVENT: cdcl3  
 NA = 4  
 F1 = 399.749542 MHz  
 F2 = 100.526031 MHz

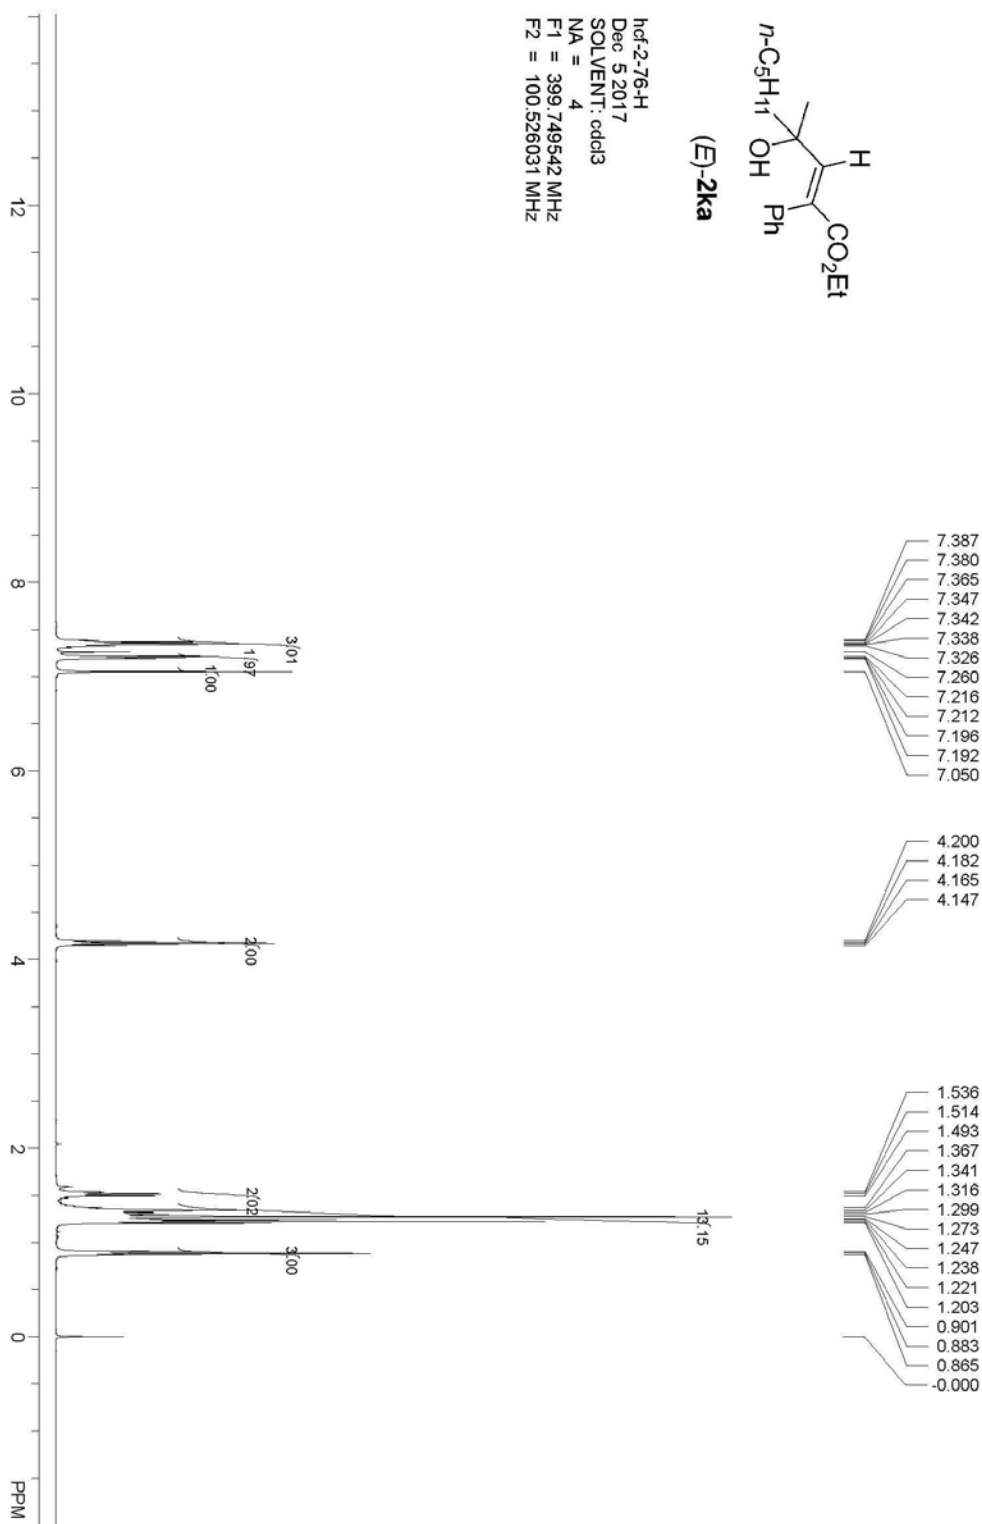



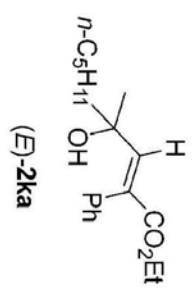

hcf-2-76-C  
 Dec 5 2017  
 SOLVENT: cdcl3  
 NA = 512  
 F1 = 100.527557 MHz  
 F2 = 399.749146 MHz

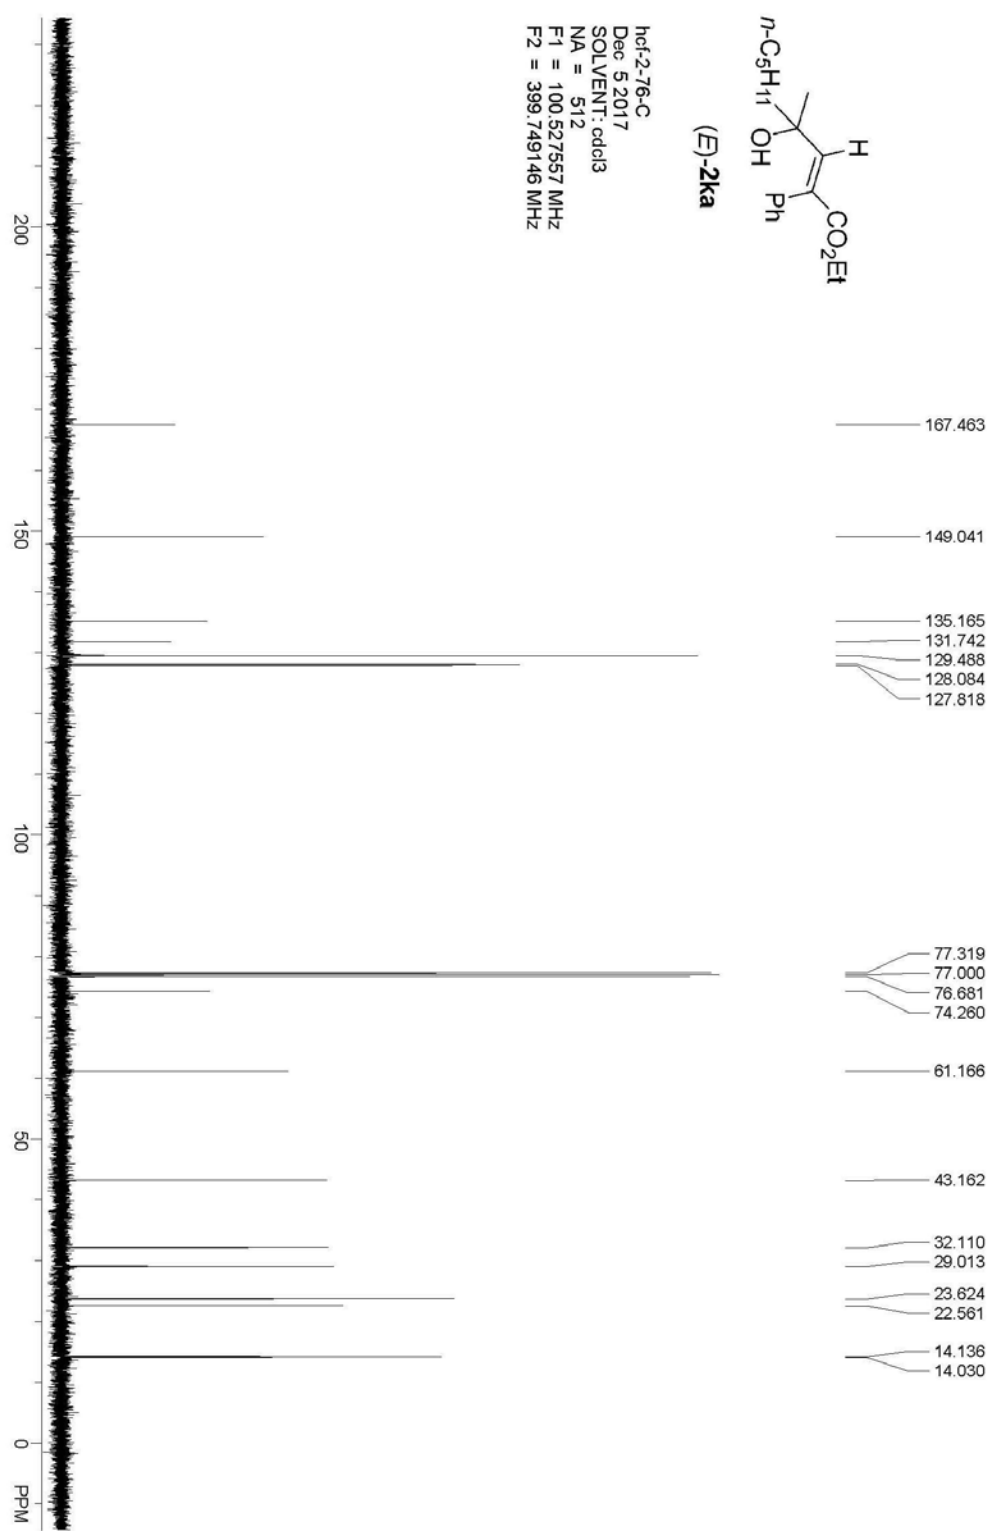

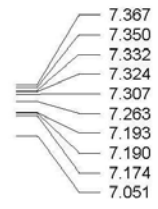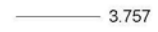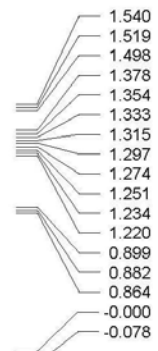

hcf-3-19-H  
Sep 24 2018  
SOLVENT: CDCl3  
NA = 4  
F1 = 400.129974 MHz  
F2 = 1.000000 MHz

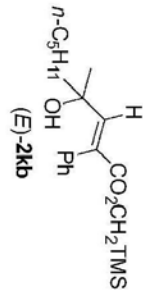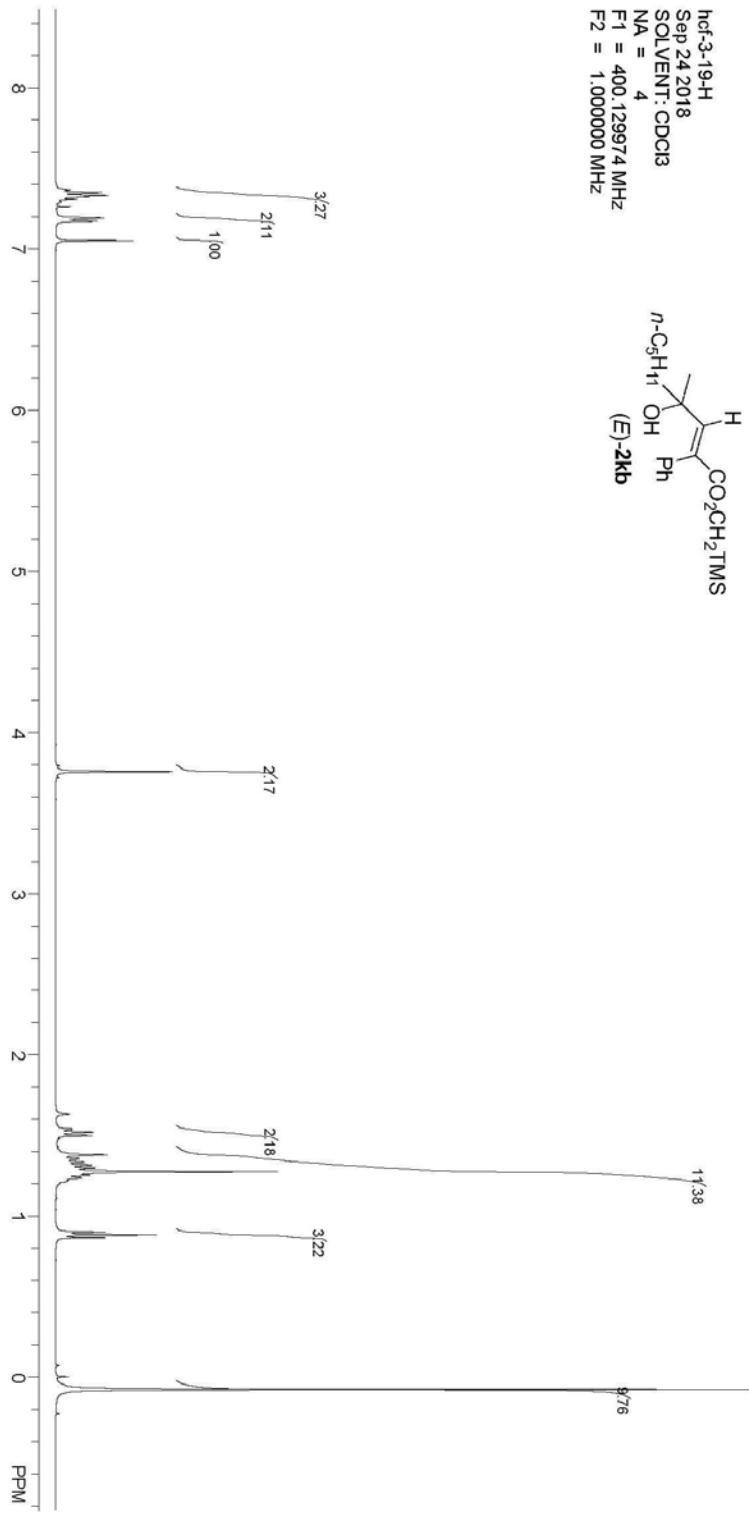

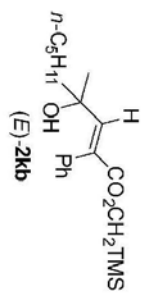

hcf-3-19-C  
 Sep 24 2018  
 SOLVENT: CDCl3  
 NA = 256  
 F1 = 100.612770 MHz  
 F2 = 1.000000 MHz

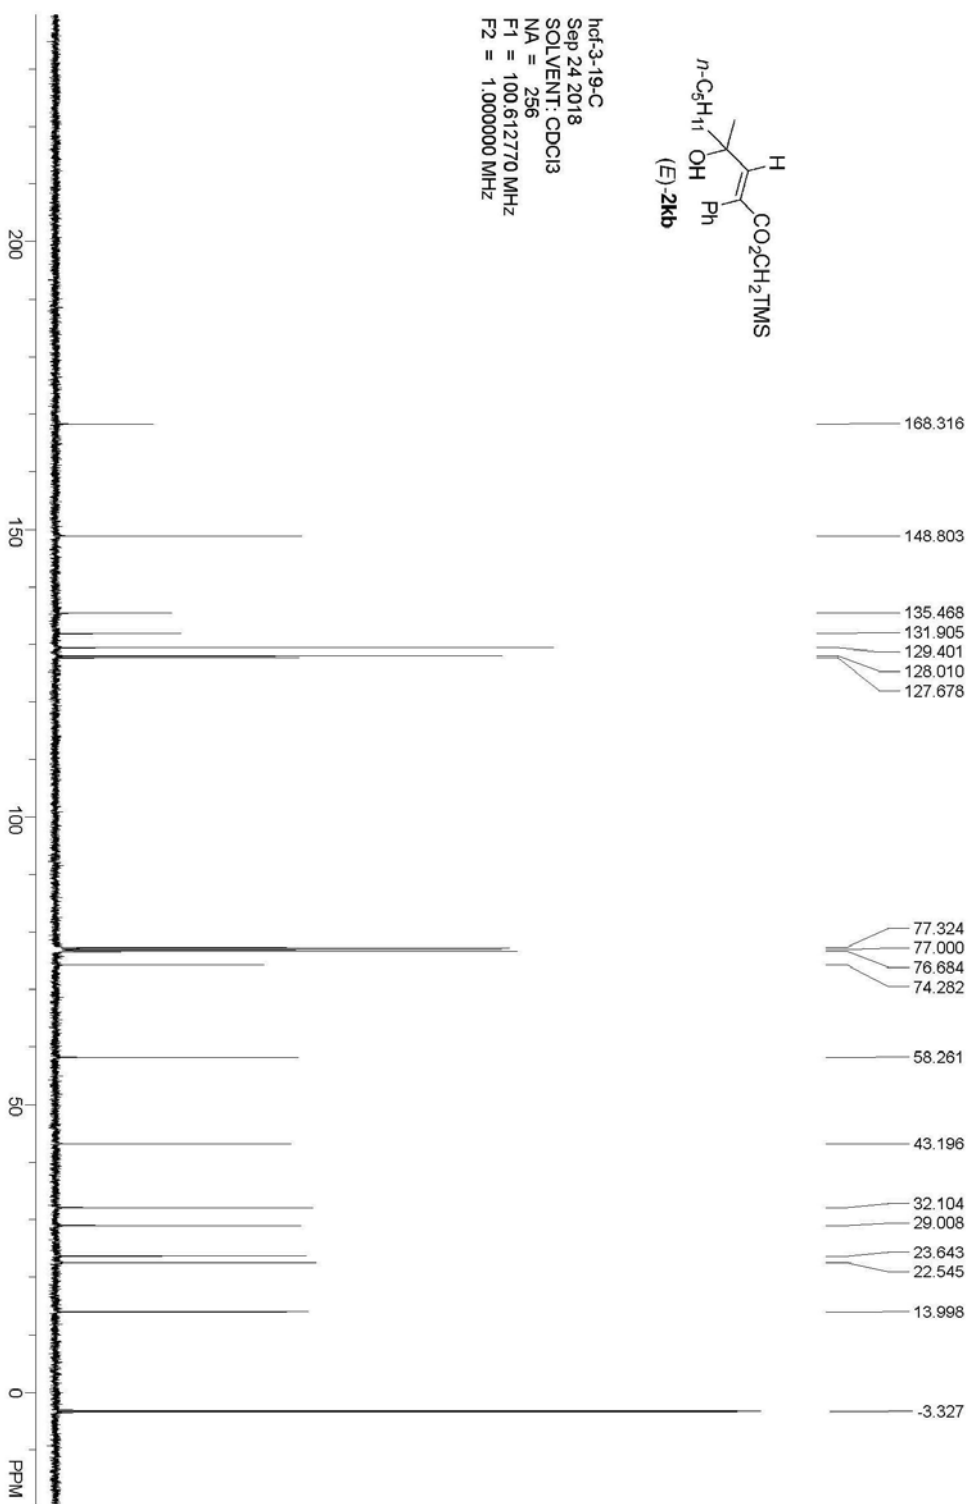

hcf-3-20-H  
 Sep 28 2018  
 SOLVENT: CDCl3  
 NA = 4  
 F1 = 400.130005 MHz  
 F2 = 1.000000 MHz

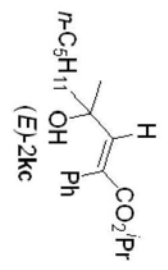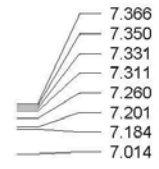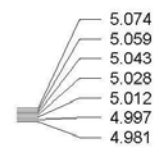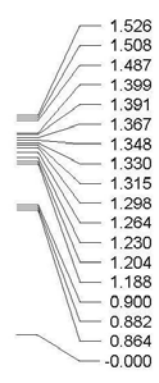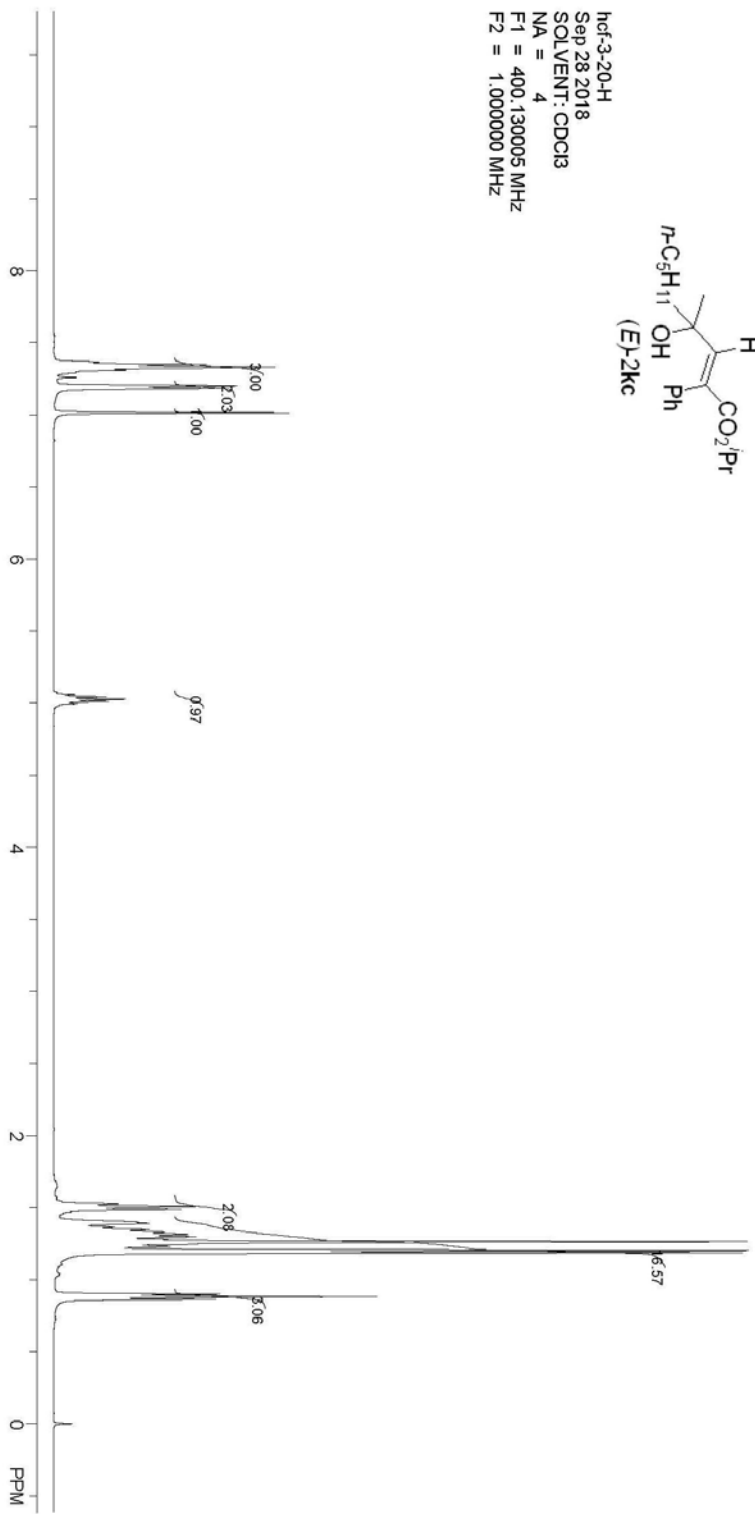

hcf-3-20-C  
Sep 28 2018  
SOLVENT: CDCl3  
NA = 128  
F1 = 100.612770 MHz  
F2 = 1.000000 MHz

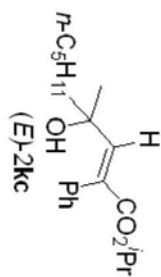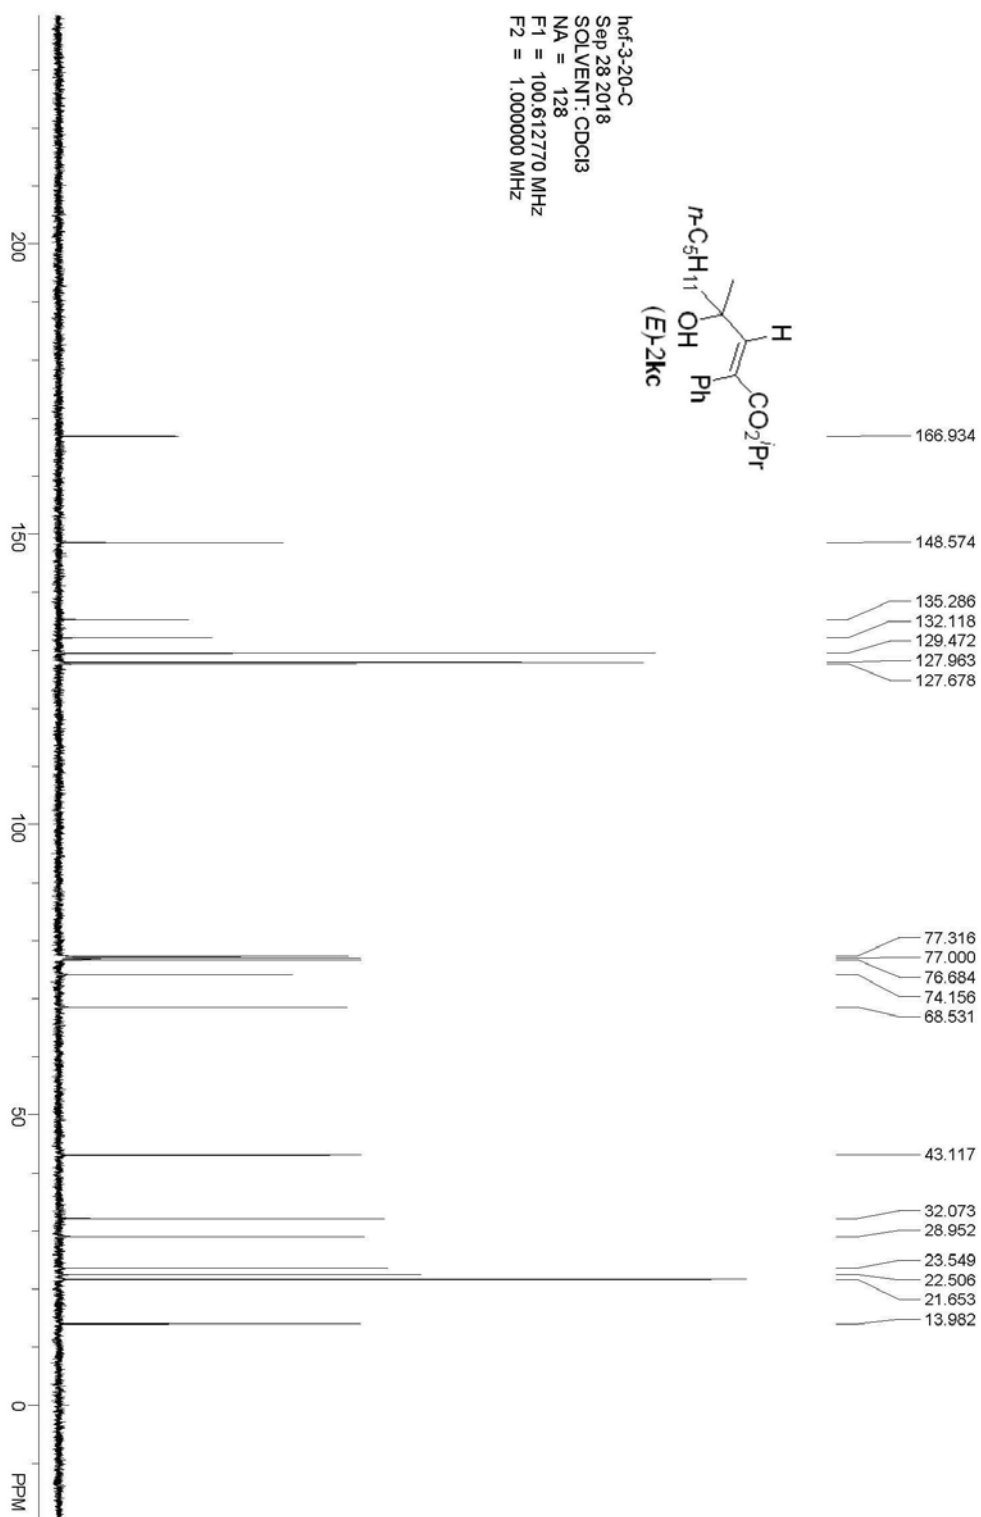

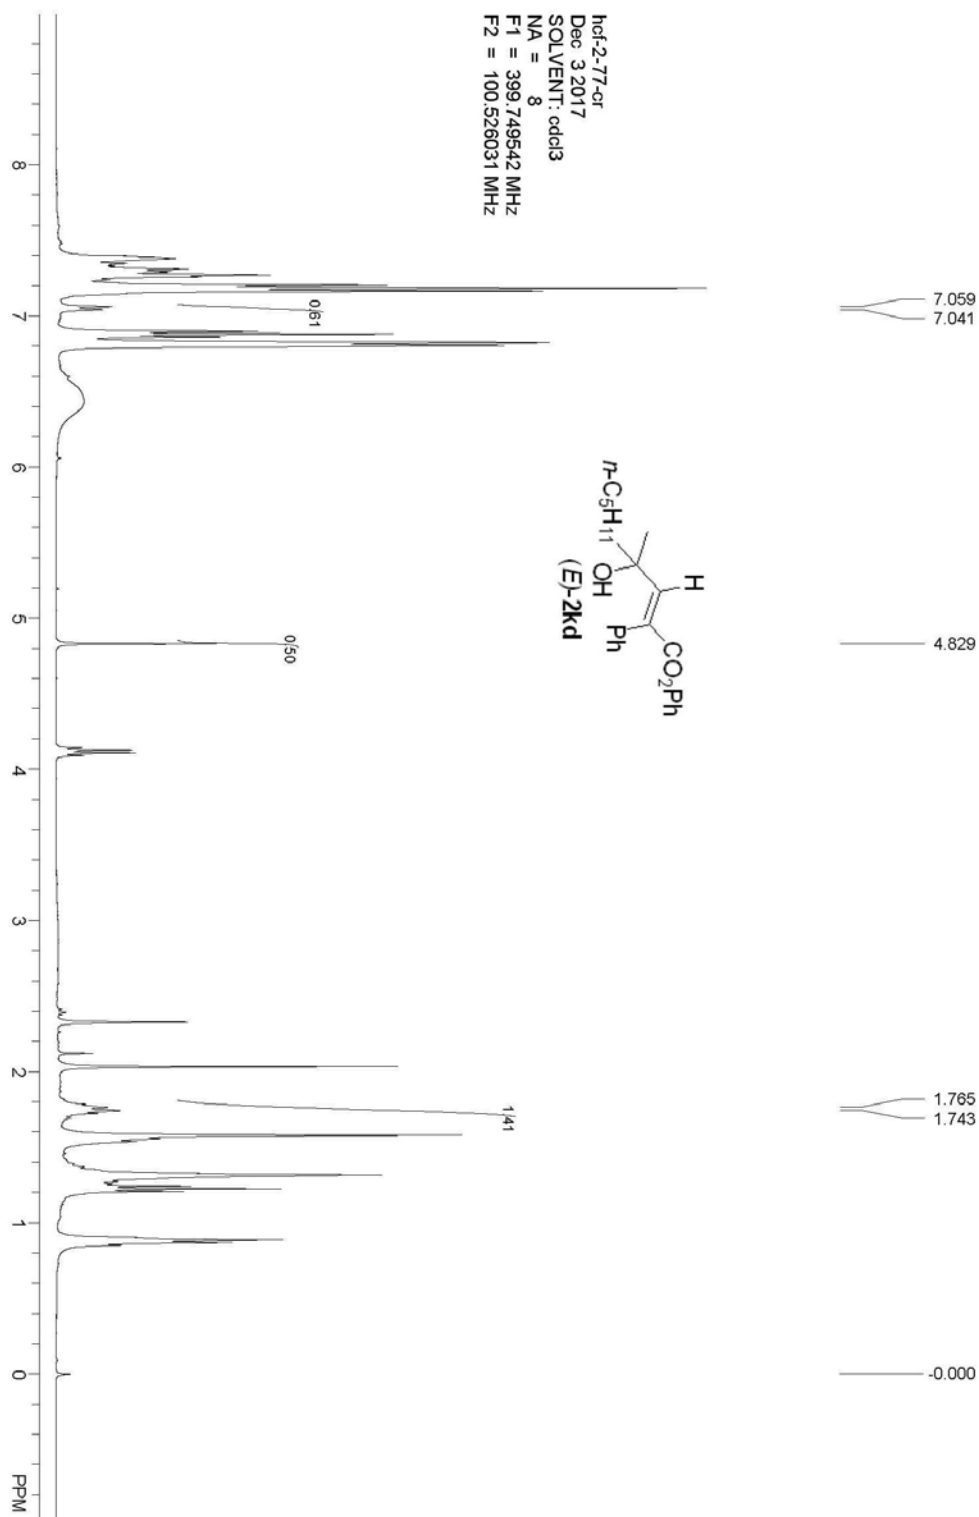

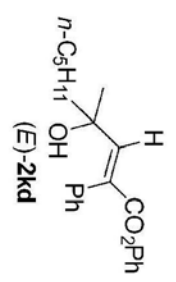

hcf-2-77-H  
 Dec 21 2017  
 SOLVENT: cdcl3  
 NA = 8  
 F1 = 399.749542 MHz  
 F2 = 100.526031 MHz

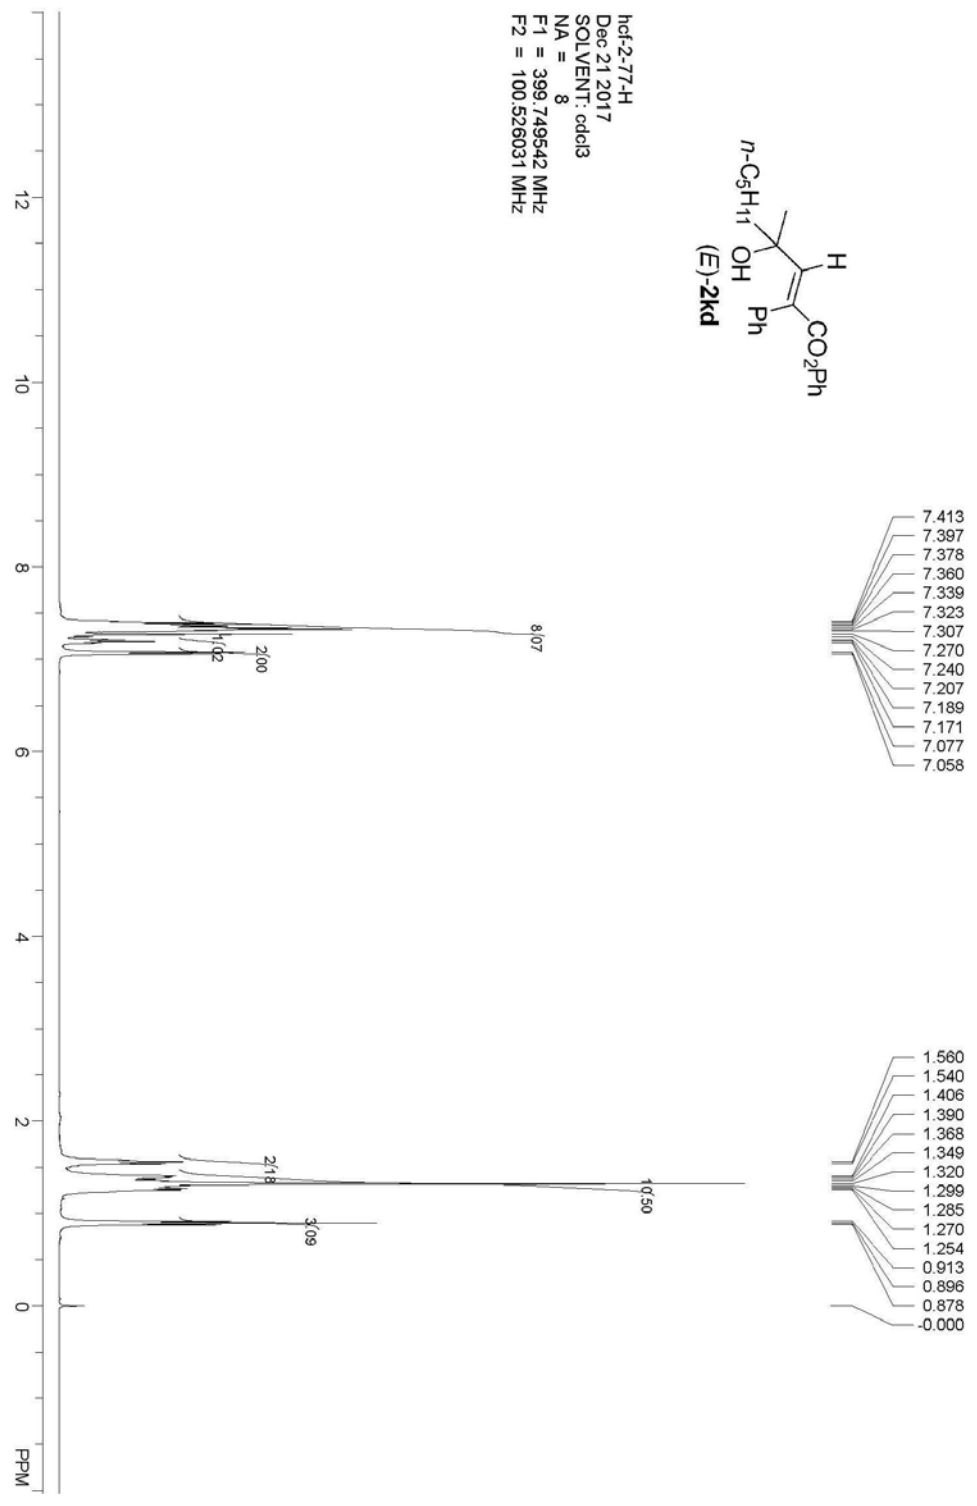

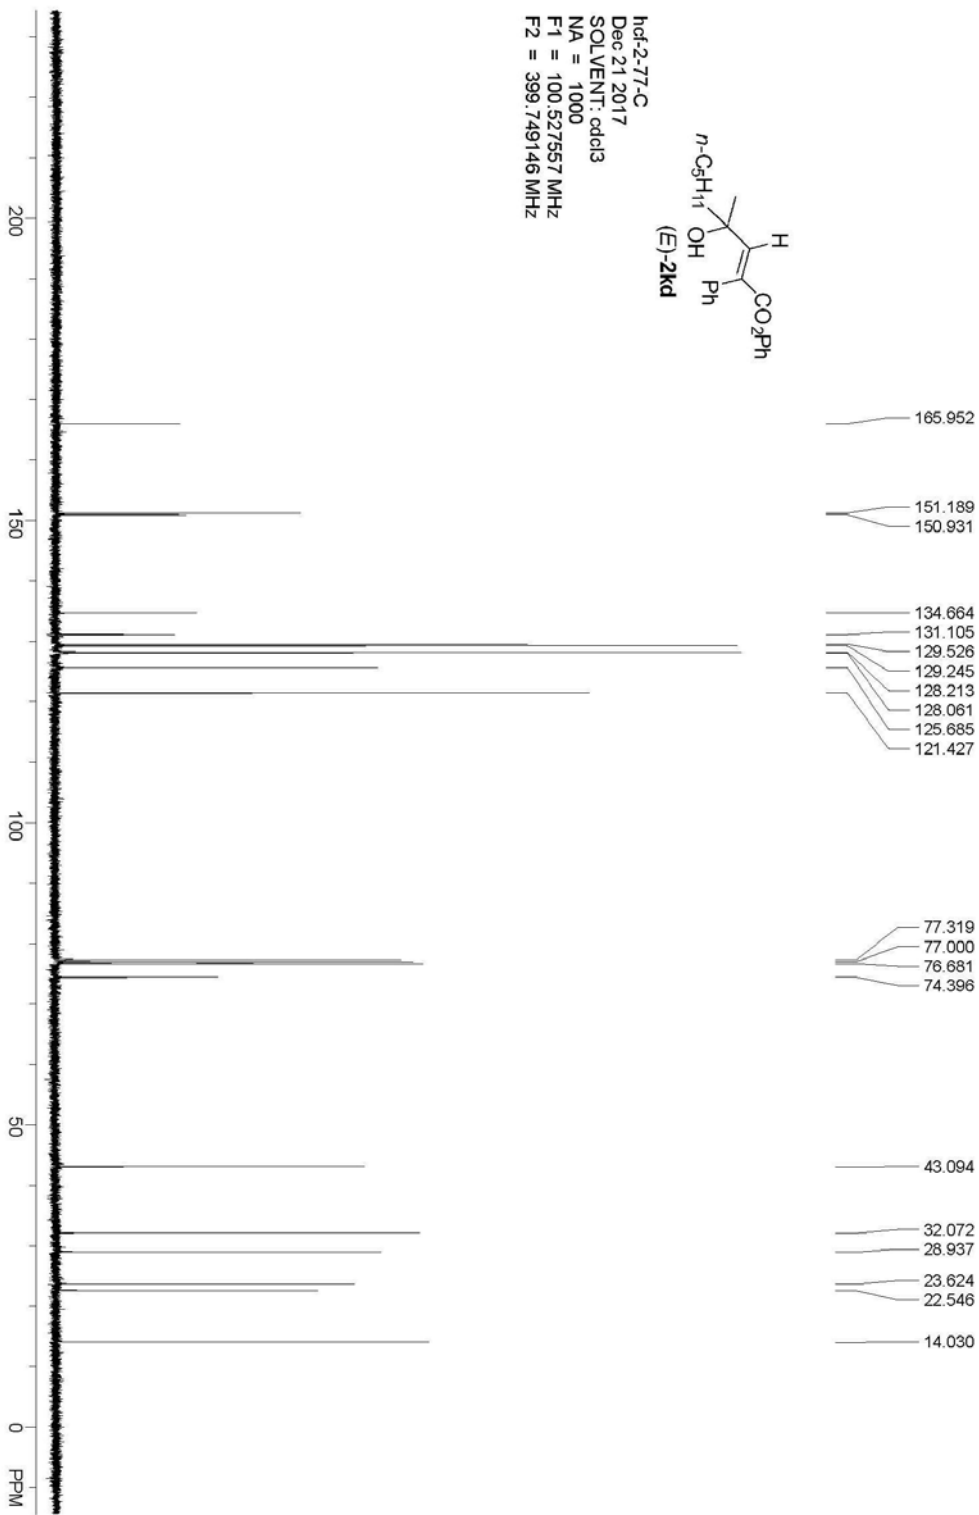



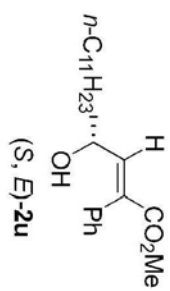

hof-2-96-H  
 Dec 28 2017  
 SOLVENT: odcl3  
 NA = 8  
 F1 = 399.749542 MHz  
 F2 = 100.526031 MHz

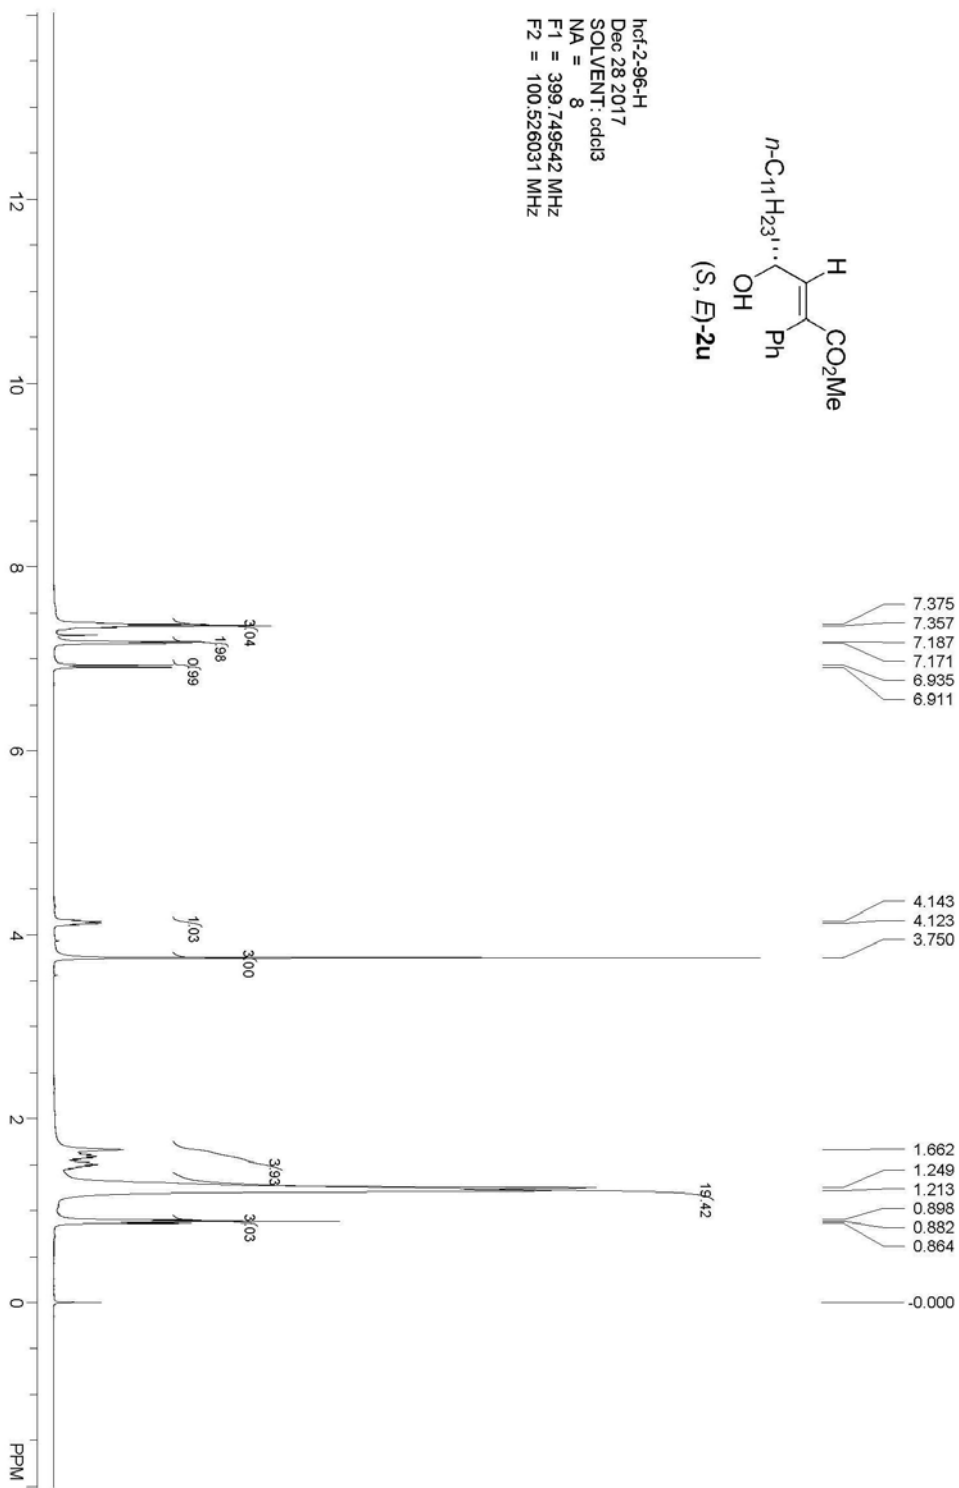

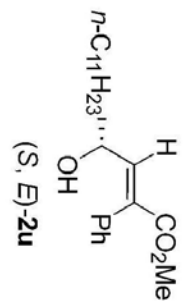

hcf:2-96-C  
 Dec 28 2017  
 SOLVENT: cdcl3  
 NA = 512  
 F1 = 100.527557 MHz  
 F2 = 399.749146 MHz

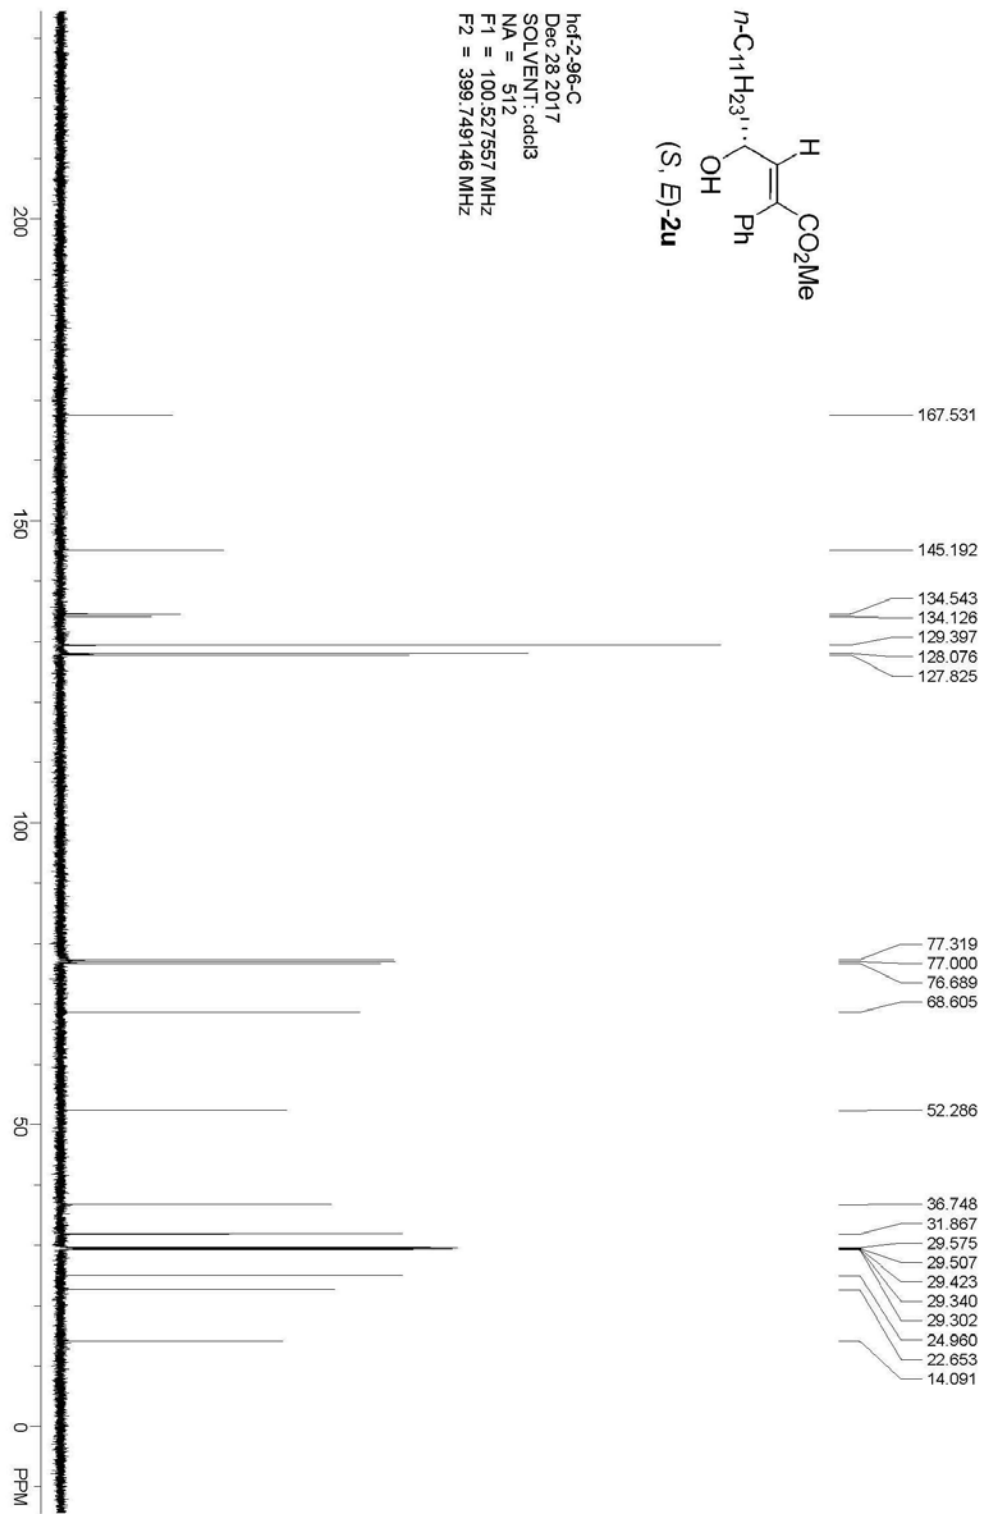

# hcf-2-79-pa-2-95-5-1-214

实验时间: 2018-01-04, 17:07:27  
谱图文件: D:\zhuguangji\hcf\20180104\hcf-2-79-pa-2-95-5-1-214.org

报告时间: 2018-01-04, 17:48:59

实验内容简介:

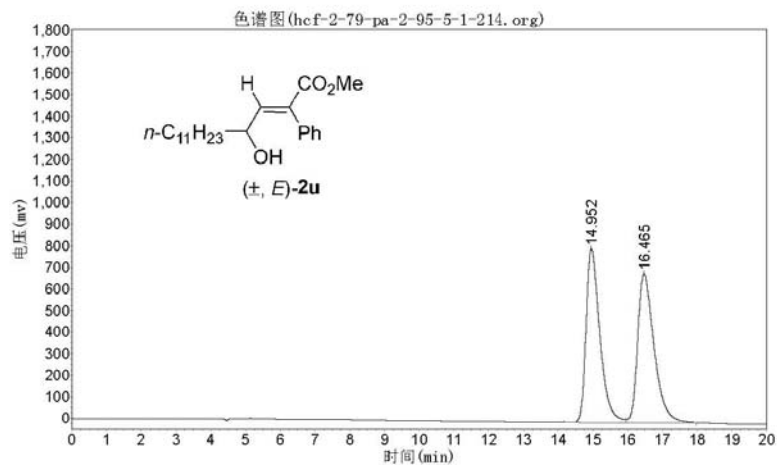

分析结果表

| 峰号 | 峰名 | 保留时间   | 峰高          | 峰面积          | 含量       |
|----|----|--------|-------------|--------------|----------|
| 1  |    | 14.952 | 806185.750  | 22177016.000 | 49.5640  |
| 2  |    | 16.465 | 689829.250  | 22567178.000 | 50.4360  |
| 总计 |    |        | 1496015.000 | 44744194.000 | 100.0000 |

# hcf-2-96-pa-2-95-5-1-214

实验时间: 2018-01-04, 17:28:11

报告时间: 2018-01-04, 17:50:52

谱图文件: D:\zhuguangjiong\hcf\20180104\hcf-2-96-pa-2-95-5-1-214.org

实验内容简介:

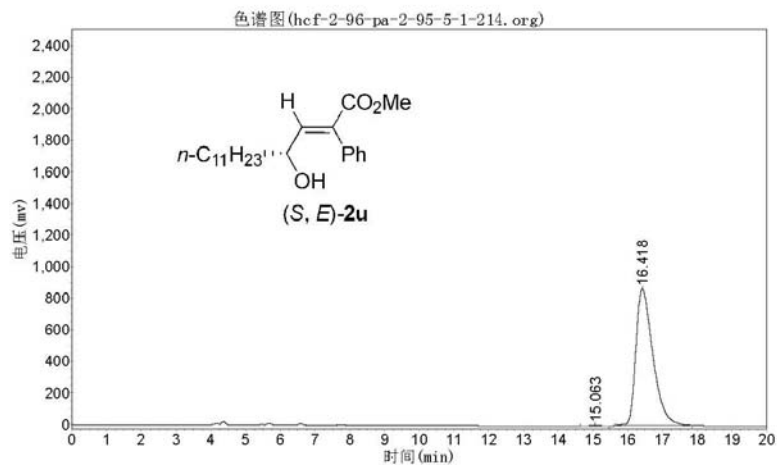

分析结果表

| 峰号 | 峰名 | 保留时间   | 峰高         | 峰面积          | 含量       |
|----|----|--------|------------|--------------|----------|
| 1  |    | 15.063 | 3885.598   | 95790.781    | 0.3263   |
| 2  |    | 16.418 | 864572.563 | 29259652.000 | 99.6737  |
| 总计 |    |        | 868458.160 | 29355442.781 | 100.0000 |

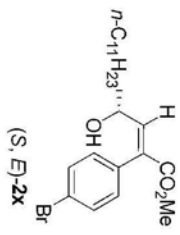

hcf-2-118-H  
 Jan 20 2018  
 SOLVENT: cdcl3  
 NA = 4  
 F1 = 399.749542 MHz  
 F2 = 100.526031 MHz

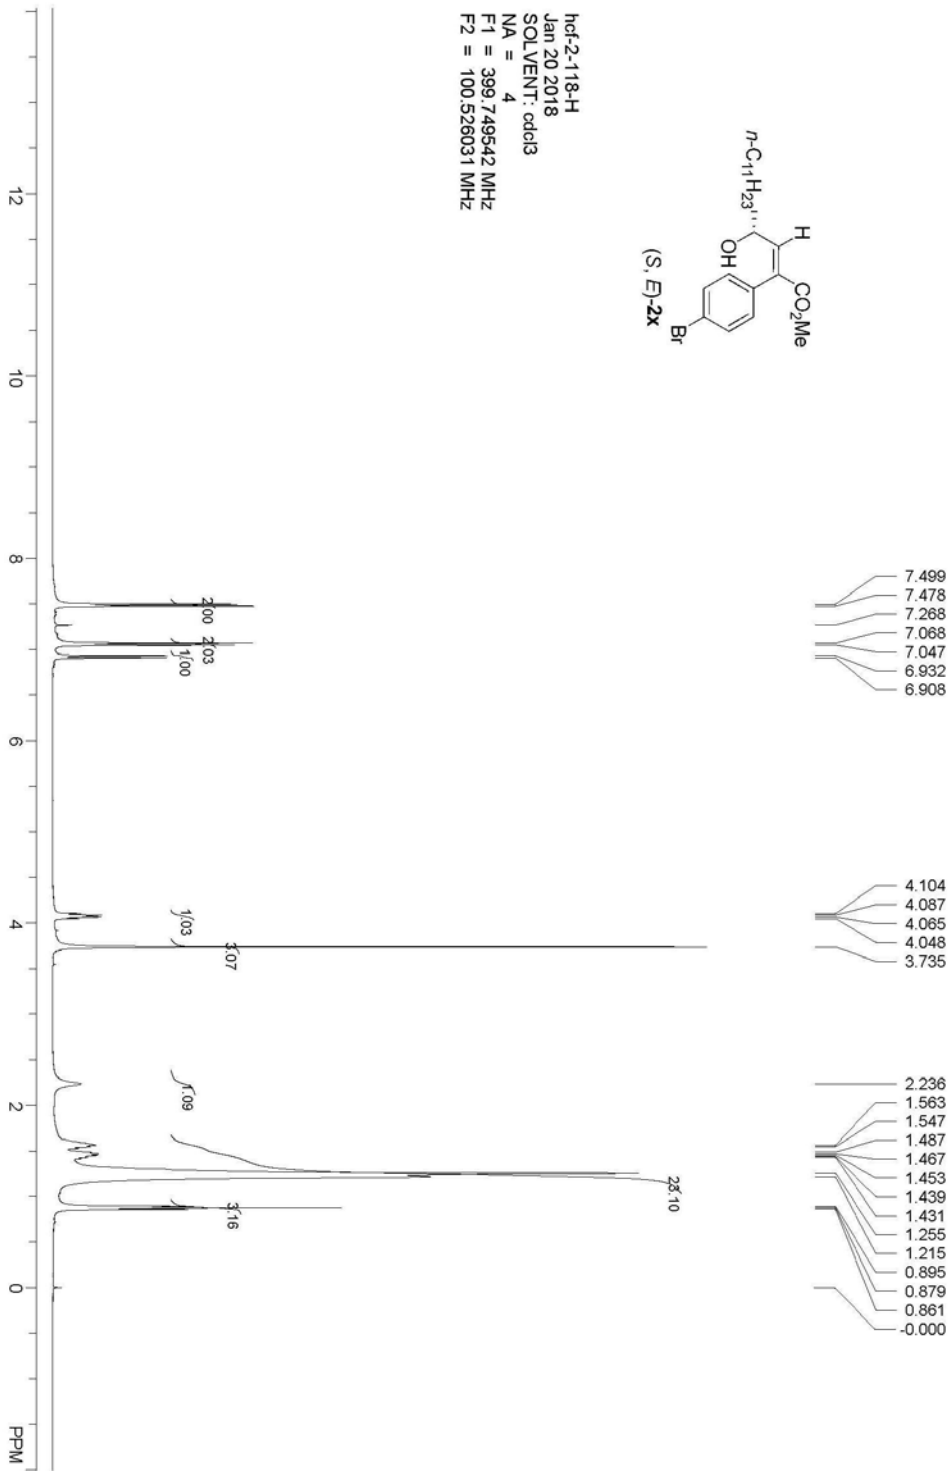

hcf2-118-C  
Jan 20 2018  
SOLVENT: cdcl3  
NA = 512  
F1 = 100.527557 MHz  
F2 = 399.749146 MHz

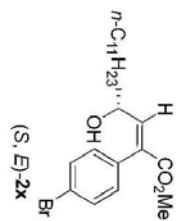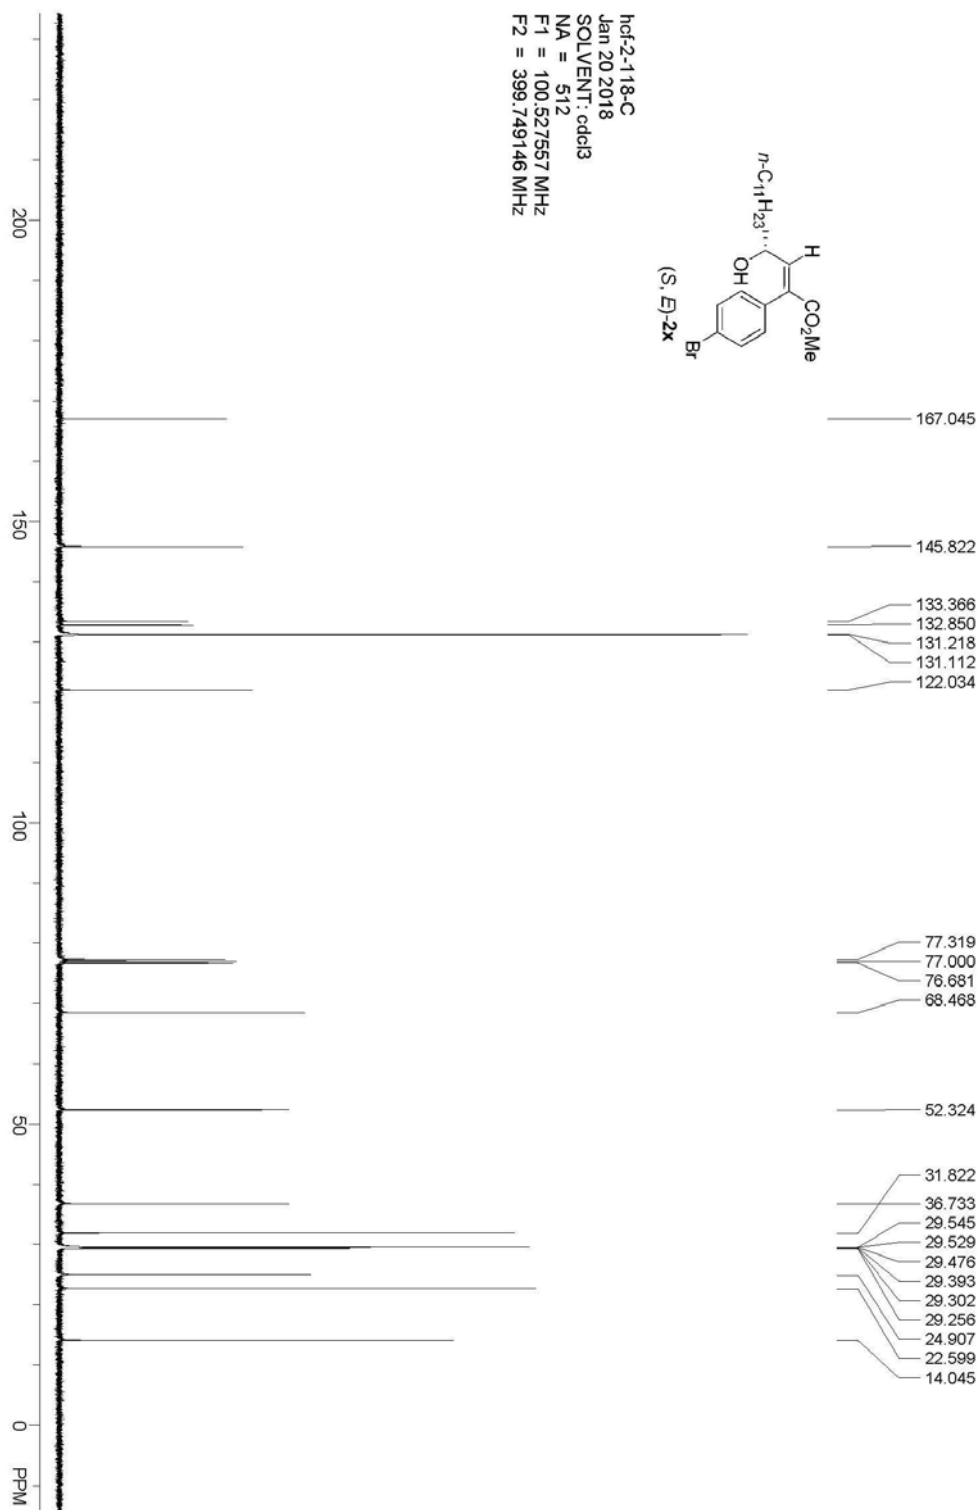

| SAMPLE INFORMATION |                           |                  |                        |
|--------------------|---------------------------|------------------|------------------------|
| Sample Name:       | hcy-2-114-as-h-97-3-1-214 | Acquired By:     | Breeze                 |
| Sample Type:       | 未知                        | Date Acquired:   | 2018/1/24 10:55:38 CST |
| Vial:              | 999                       | Acq. Method:     | zgj97                  |
| Injection #:       | 285                       | Date Processed:  | 2018/1/24 15:23:10 CST |
| Injection Volume:  | 10.00 $\mu$ l             | Channel Name:    | V2489 ChA              |
| Run Time:          | 20.00 Minutes             | Channel Desc.:   | V2489 ChA.214nm        |
| Column Type:       |                           | Sample Set Name: |                        |

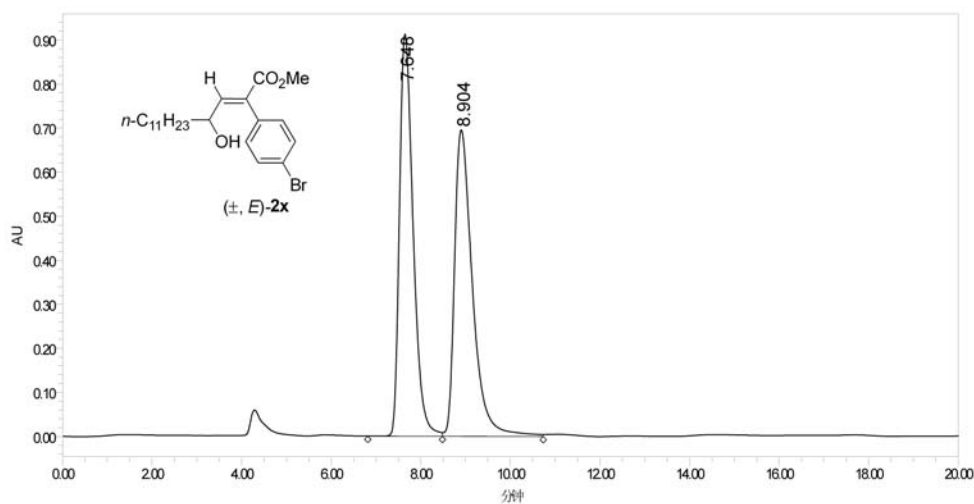

|   | RT (min) | Area (AU*sec) | %Area | Height (AU) | % Height |
|---|----------|---------------|-------|-------------|----------|
| 1 | 7.64E    | 1932806C      | 50.0C | 91271E      | 56.7E    |
| 2 | 8.904    | 1933113C      | 50.0C | 66557E      | 43.2E    |

| SAMPLE INFORMATION |                           |                  |                        |
|--------------------|---------------------------|------------------|------------------------|
| Sample Name:       | hcy-2-118-as-h-97-3-1-214 | Acquired By:     | Breeze                 |
| Sample Type:       | 未知                        | Date Acquired:   | 2018/1/24 12:30:05 CST |
| Vial:              | 999                       | Acq. Method:     | zgj97                  |
| Injection #:       | 288                       | Date Processed:  | 2018/1/24 15:25:06 CST |
| Injection Volume:  | 10.00 $\mu$ l             | Channel Name:    | V2489 ChA              |
| Run Time:          | 20.00 Minutes             | Channel Desc.:   | V2489 ChA.214nm        |
| Column Type:       |                           | Sample Set Name: |                        |

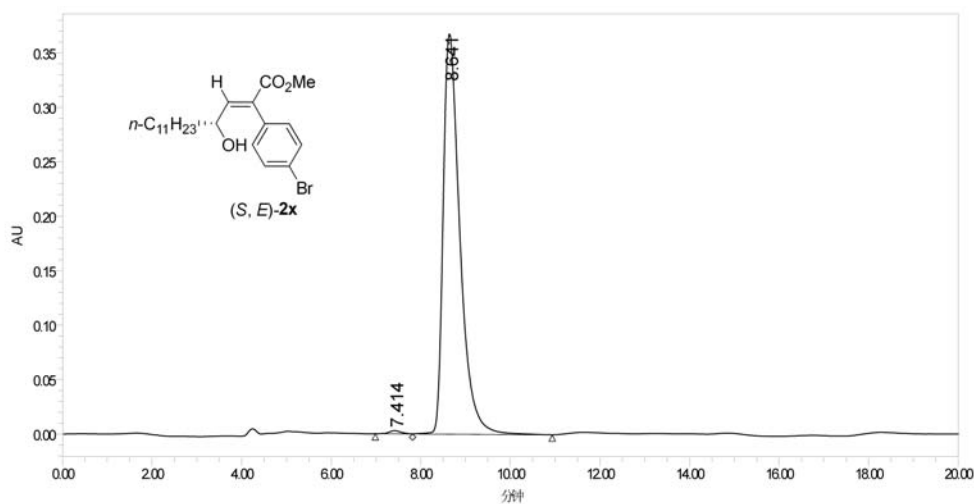

|   | RT (min) | Area (AU*sec) | %Area | Height (AU) | % Height |
|---|----------|---------------|-------|-------------|----------|
| 1 | 7.414    | 5638E         | 0.6E  | 2874        | 0.7E     |
| 2 | 8.641    | 963706E       | 99.4E | 36790E      | 99.2E    |



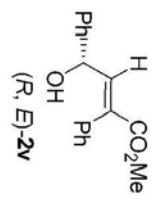

hcf-2-132-H  
 Jan 29 2018  
 SOLVENT: cdcl3  
 NA = 8  
 F1 = 399.749542 MHz  
 F2 = 100.526031 MHz

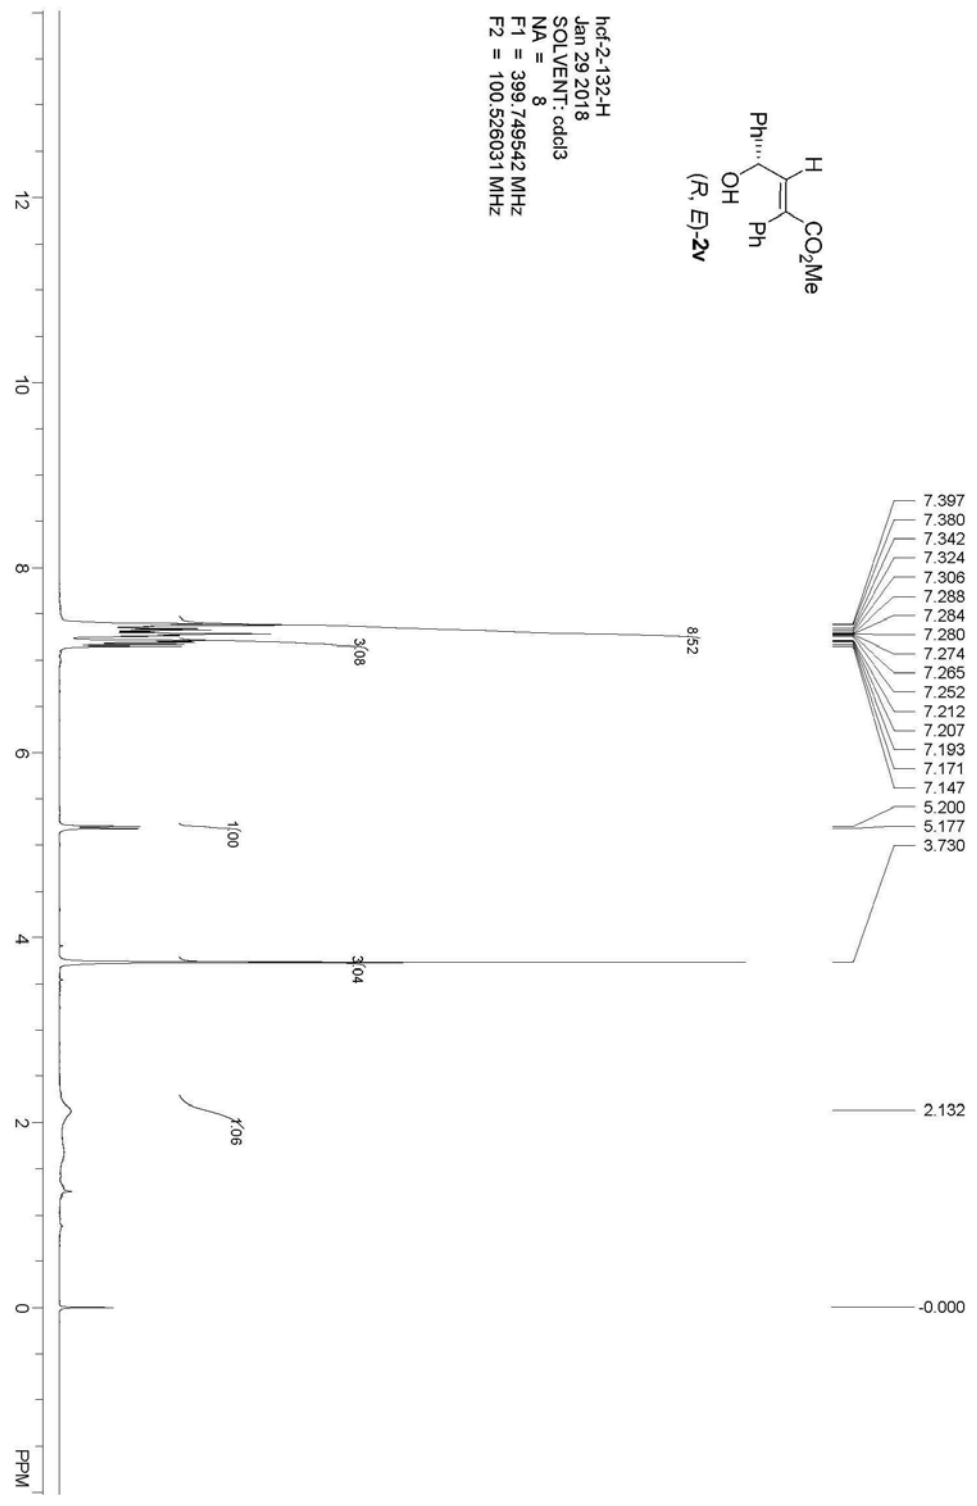

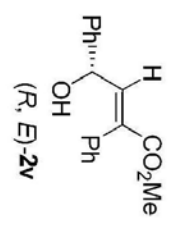

hdf-2-132-C  
Jan 29 2018  
SOLVENT: cddcl3  
NA = 1000  
F1 = 100.527557 MHz  
F2 = 399.749146 MHz

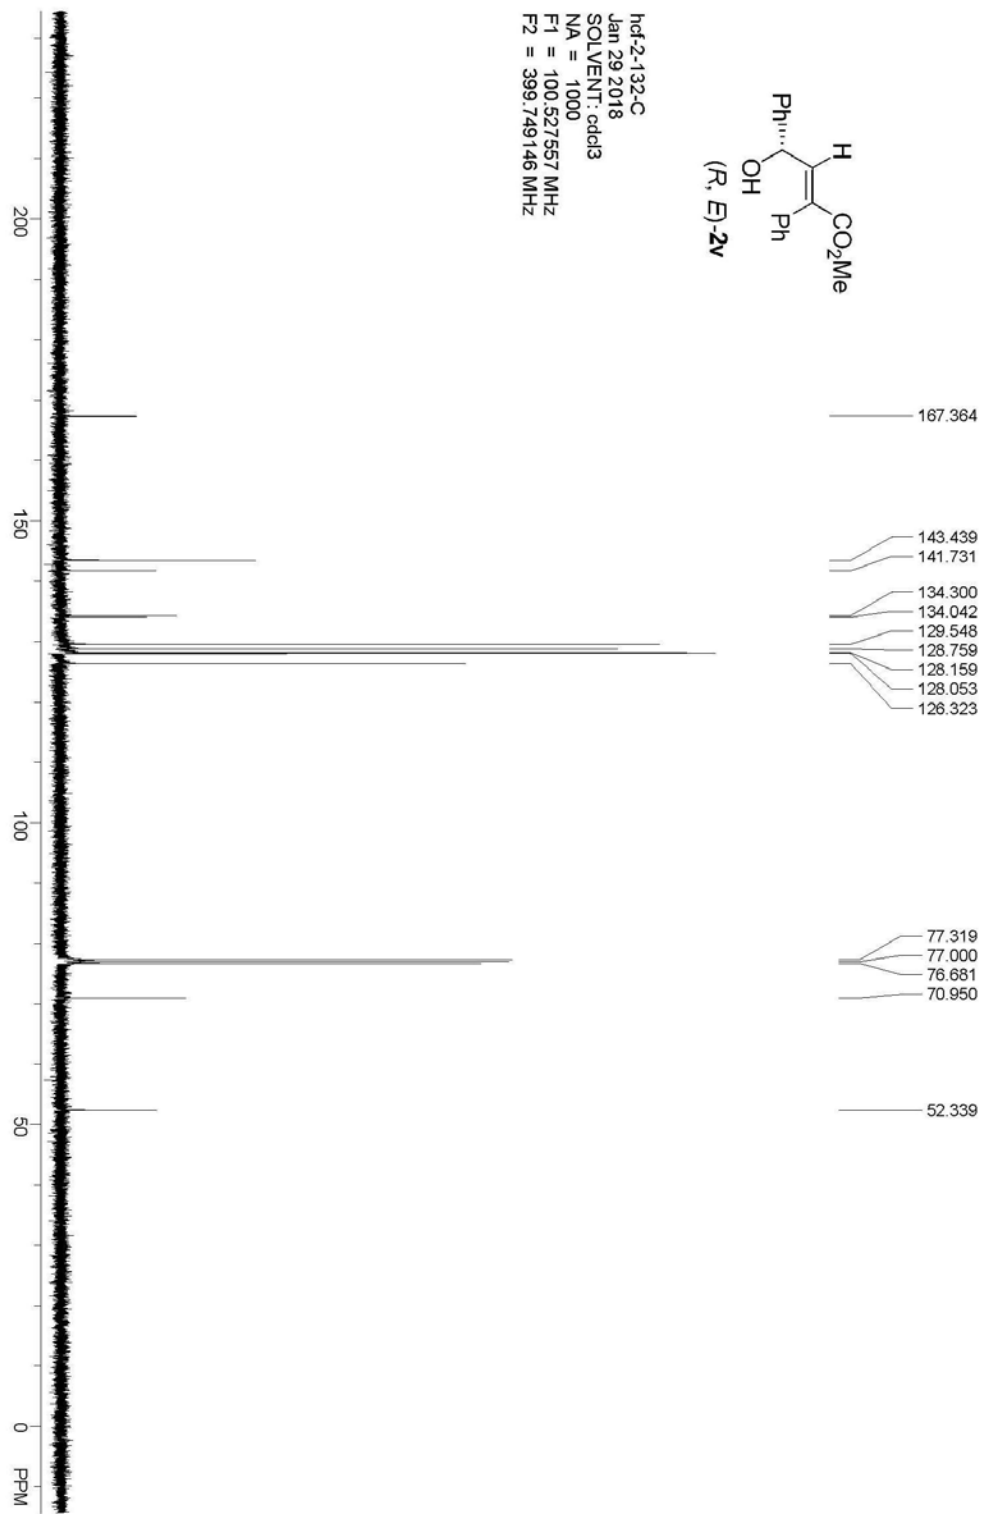

## hcf-2-125-pa-2-80-20-0.7-214

实验时间: 2018-02-02, 15:21:17  
谱图文件: D:\zhuguangjiang\hcf\20180131\hcf-2-125-pa-2-80-20-0.7-214.org

报告时间: 2018-02-02, 17:16:54

实验内容简介:

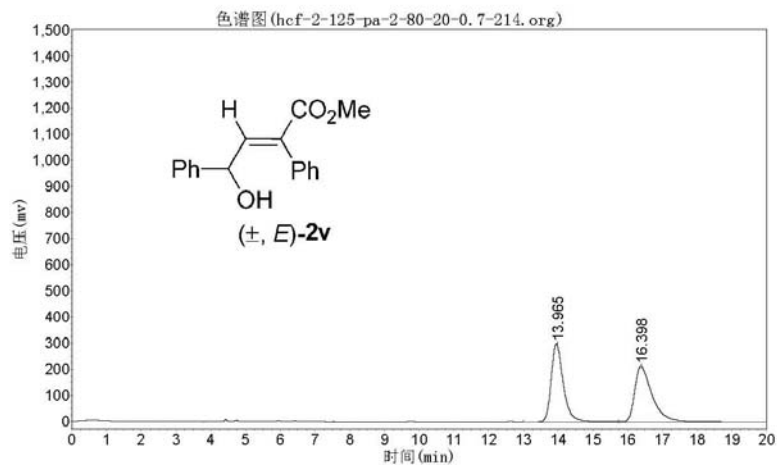

分析结果表

| 峰号 | 峰名 | 保留时间   | 峰高         | 峰面积          | 含量       |
|----|----|--------|------------|--------------|----------|
| 1  |    | 13.965 | 298364.969 | 7329453.500  | 49.5159  |
| 2  |    | 16.398 | 212095.734 | 7472764.000  | 50.4841  |
| 总计 |    |        | 510460.703 | 14802217.500 | 100.0000 |

## hcf-2-132-pa-2-80-20-0.7-214

实验时间: 2018-02-02, 16:06:47  
谱图文件: D:\zhuguangji\hcf\20180131\hcf-2-132-pa-2-80-20-0.7-214. .org

报告时间: 2018-02-02, 17:18:24

实验内容简介:

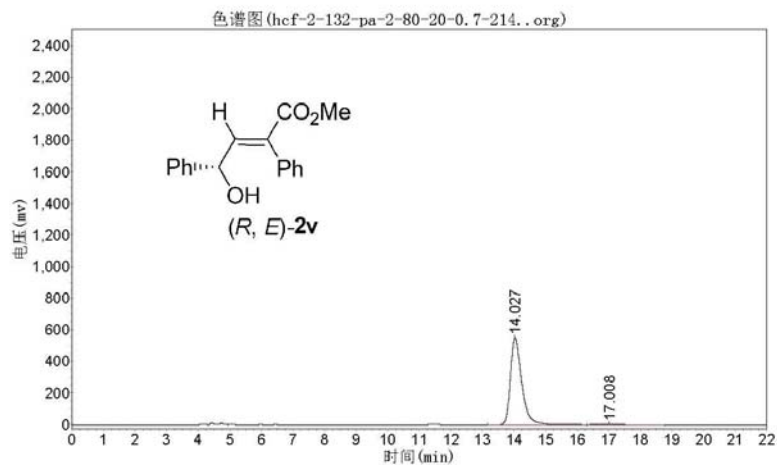

分析结果表

| 峰号 | 峰名 | 保留时间   | 峰高         | 峰面积          | 含量       |
|----|----|--------|------------|--------------|----------|
| 1  |    | 14.027 | 546686.625 | 13619557.000 | 99.4113  |
| 2  |    | 17.008 | 1243.959   | 80652.625    | 0.5887   |
| 总计 |    |        | 547930.584 | 13700209.625 | 100.0000 |

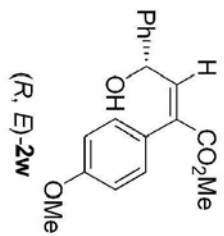

hcf-2-152-H  
 Mar 11 2018  
 SOLVENT: cdcl3  
 NA = 4  
 F1 = 399.749542 MHz  
 F2 = 100.526031 MHz

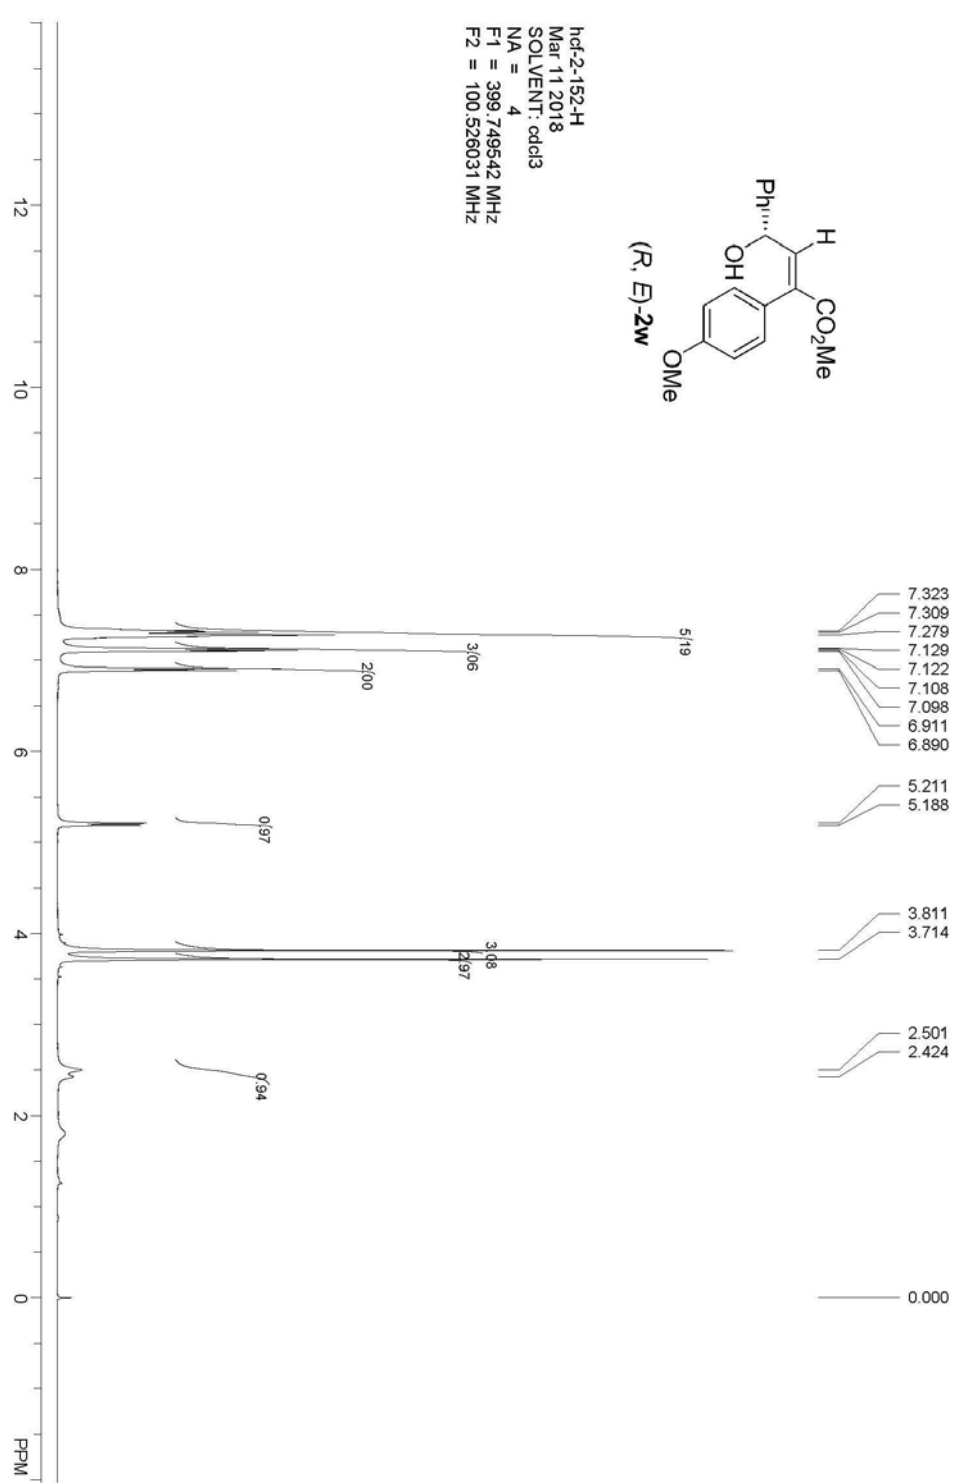

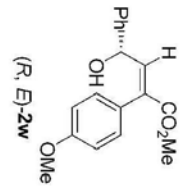

hcf-2-152-C  
Mar 12 2018  
SOLVENT: cdcl3  
NA = 512  
F1 = 100.527557 MHz  
F2 = 399.749146 MHz

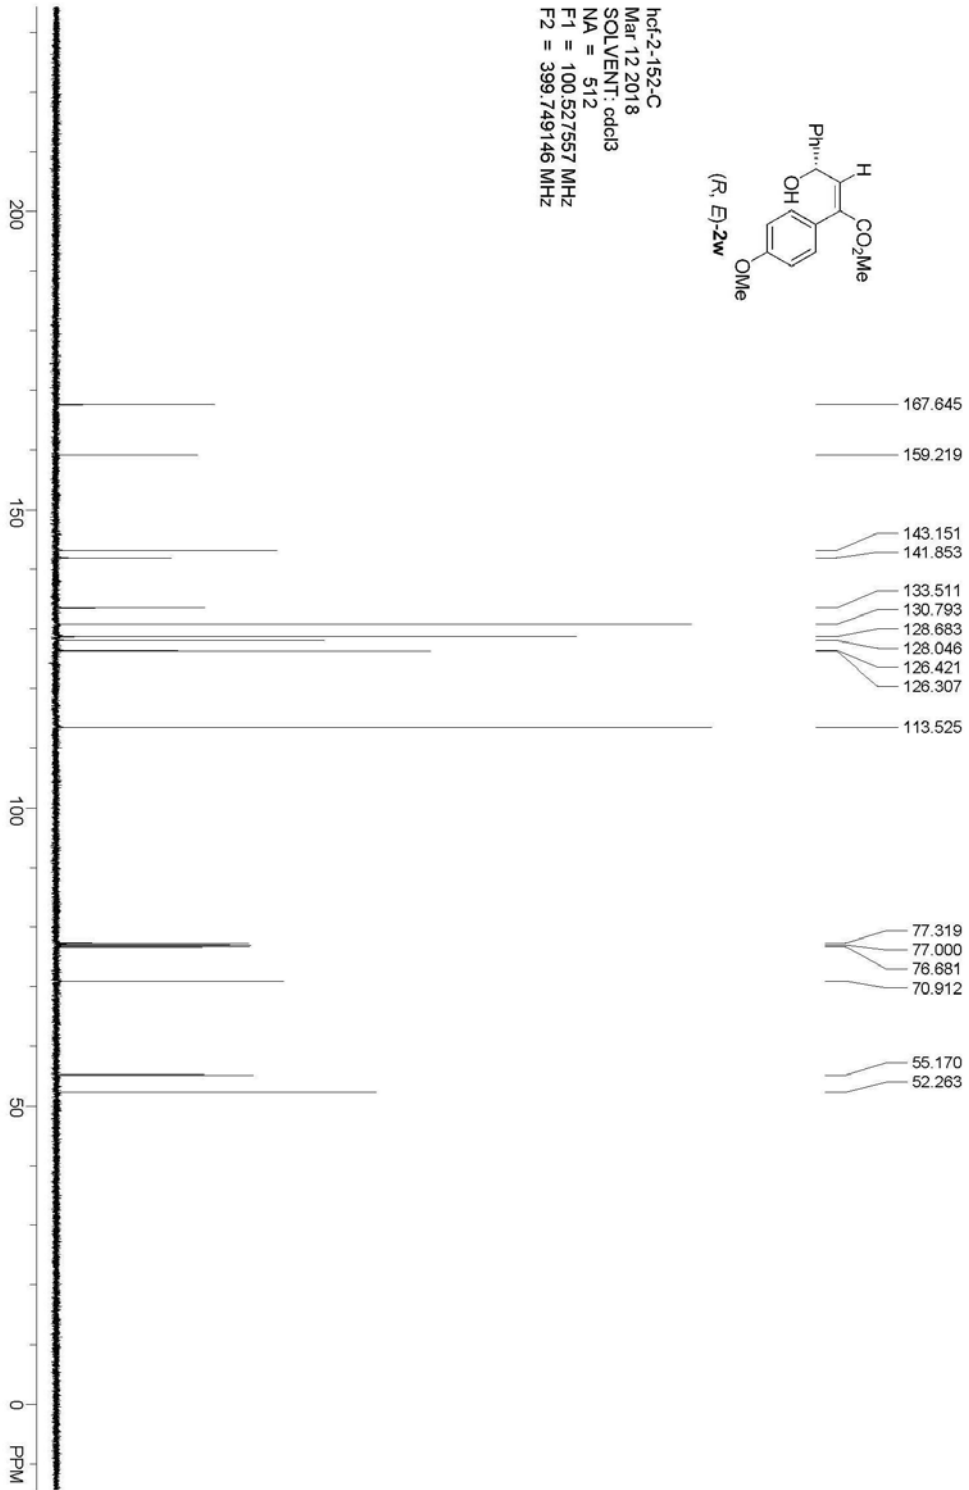

## hcf-2-126-pc-2-50-50-0.8-214

实验时间: 2018-02-06, 10:26:57  
谱图文件: D:\zhuguangjiang\hcf\20180205\hcf-2-126-pc-2-50-50-0.8-214...org

报告时间: 2018-02-06, 12:29:43

实验内容简介:

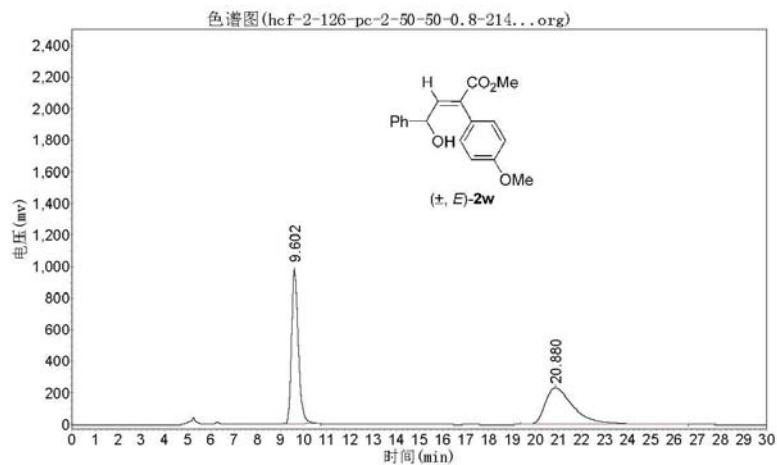

分析结果表

| 峰号 | 峰名 | 保留时间   | 峰高          | 峰面积          | 含量       |
|----|----|--------|-------------|--------------|----------|
| 1  |    | 9.602  | 973350.625  | 19930722.000 | 50.1094  |
| 2  |    | 20.880 | 232116.125  | 19843714.000 | 49.8906  |
| 总计 |    |        | 1205466.750 | 39774436.000 | 100.0000 |

| SAMPLE INFORMATION |                              |                  |                        |
|--------------------|------------------------------|------------------|------------------------|
| Sample Name:       | hcf-2-152-pc-2-50-50-0.8-214 | Acquired By:     | Breeze                 |
| Sample Type:       | 未知                           | Date Acquired:   | 2018/3/13 18:23:01 CST |
| Vial:              | 999                          | Acq. Method:     | zq50                   |
| Injection #:       | 17                           | Date Processed:  | 2018/3/13 18:47:07 CST |
| Injection Volume:  | 10.00 ul                     | Channel Name:    | V2489 ChA              |
| Run Time:          | 20.00 Minutes                | Channel Desc.:   | V2489 ChA.214nm        |
| Column Type:       |                              | Sample Set Name: |                        |

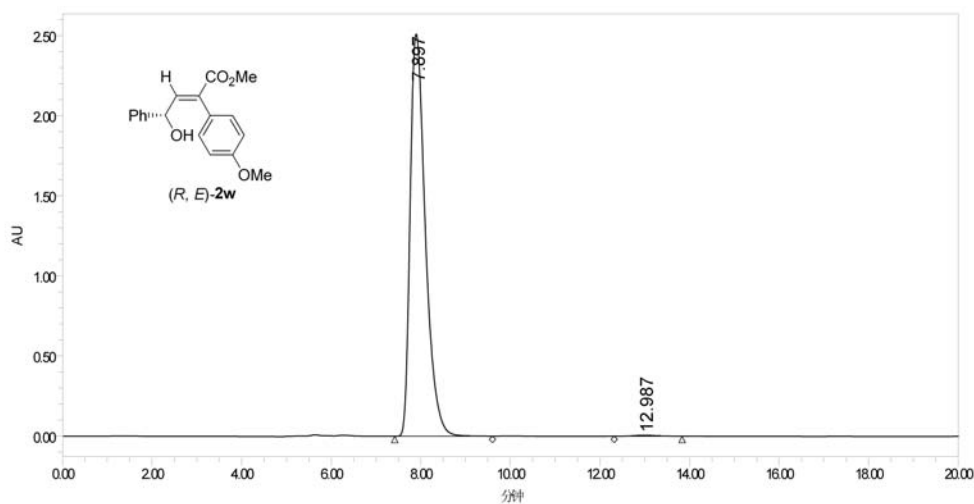

|   | RT (min) | Area (AU*sec) | %Area | Height (AU) | % Height |
|---|----------|---------------|-------|-------------|----------|
| 1 | 7.897    | 5925666       | 99.68 | 2510851     | 99.78    |
| 2 | 12.987   | 21088         | 0.32  | 5524        | 0.22     |



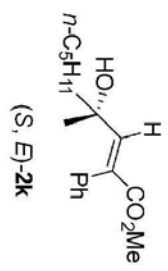

hcf-2-128-H  
 Jan 26 2018  
 SOLVENT: cdcl3  
 NA = 4  
 F1 = 399.749542 MHz  
 F2 = 100.526031 MHz

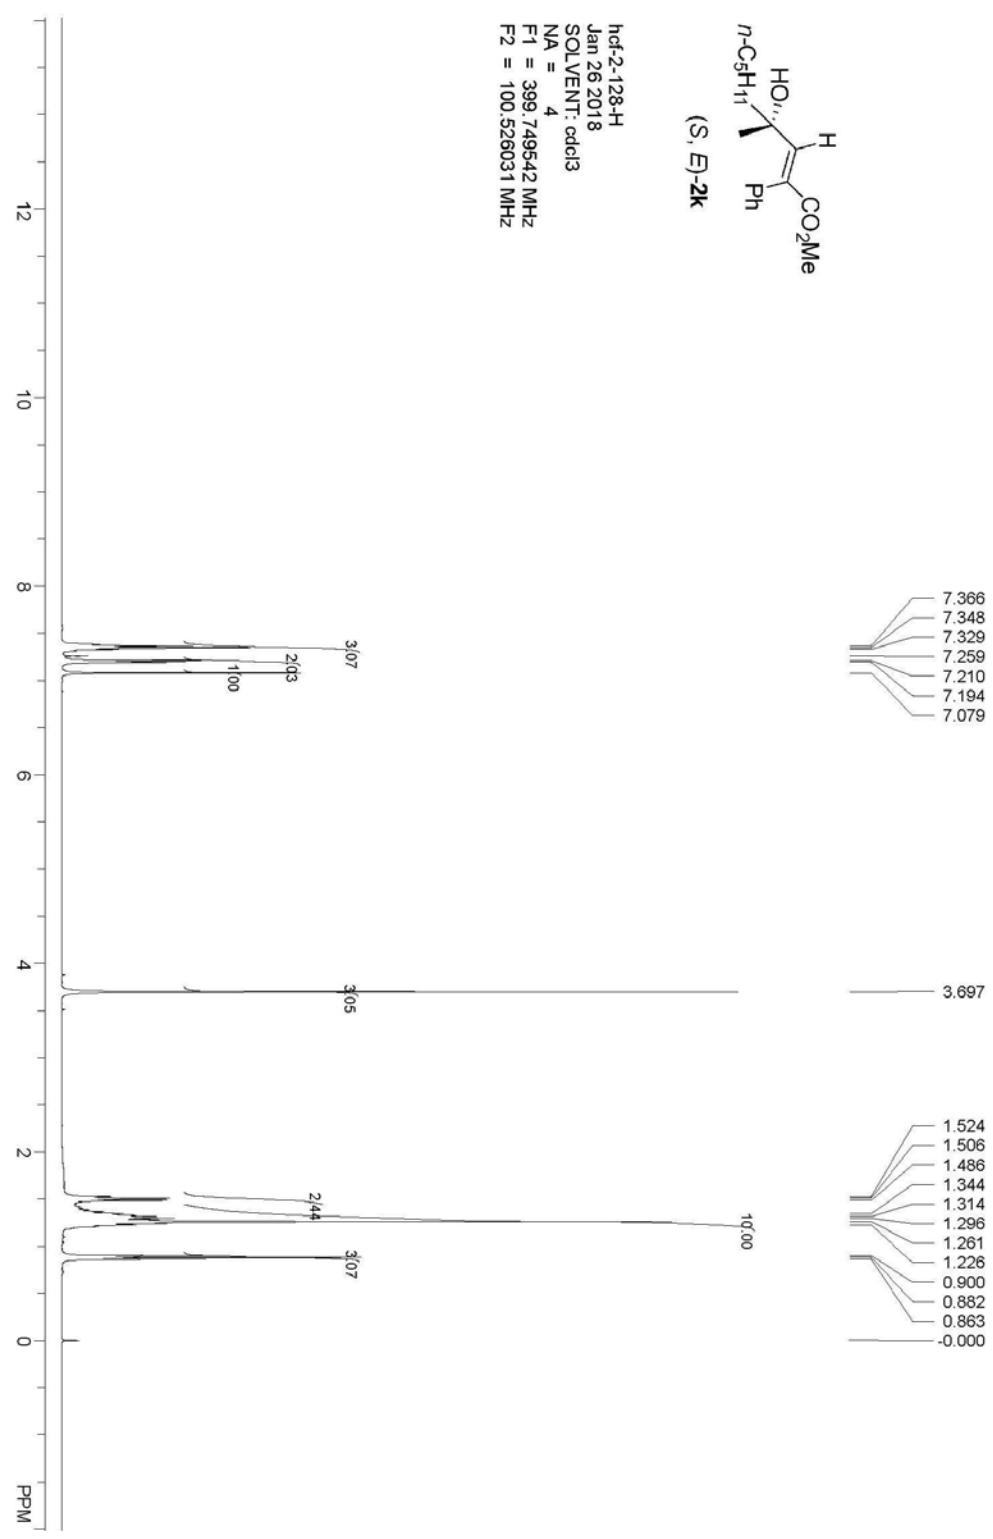

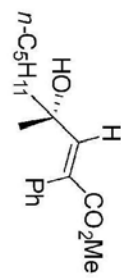

(S, E)-2k

hdf-2-128-C  
 Jan 26 2018  
 SOLVENT: odd13  
 NA = 512  
 F1 = 100.527557 MHz  
 F2 = 399.749146 MHz

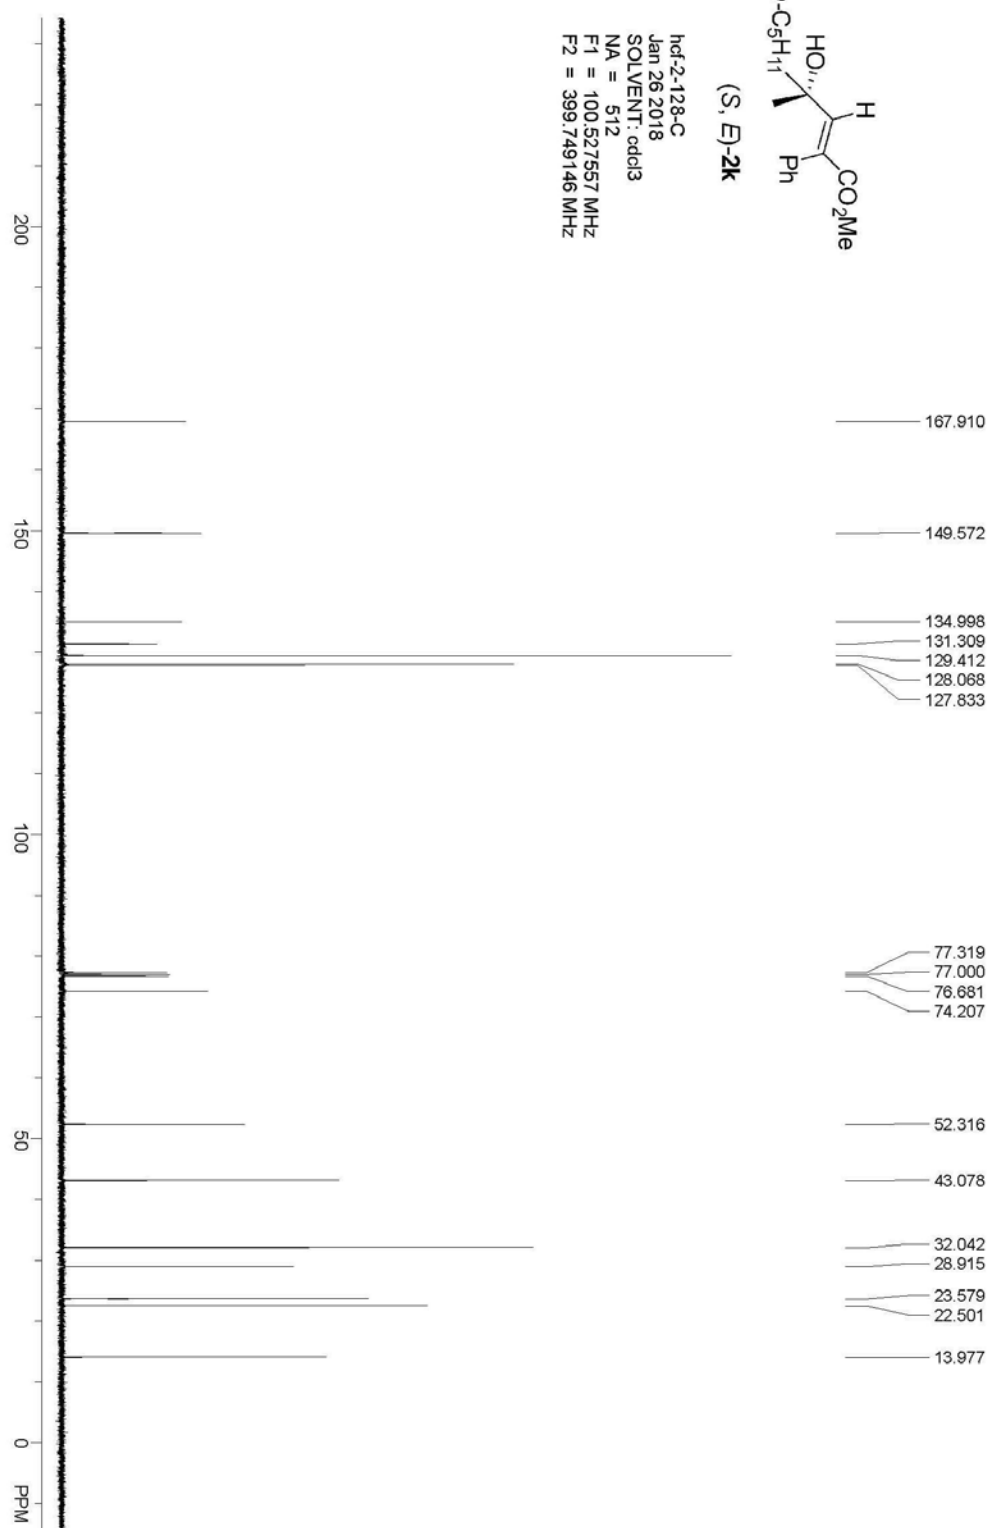

| SAMPLE INFORMATION |                          |                  |                        |
|--------------------|--------------------------|------------------|------------------------|
| Sample Name:       | hcf-2-46-pa-2-95-5-1-214 | Acquired By:     | Breeze                 |
| Sample Type:       | 未知                       | Date Acquired:   | 2018/1/26 14:14:49 CST |
| Vial:              | 999                      | Acq. Method:     | zj95                   |
| Injection #:       | 291                      | Date Processed:  | 2018/1/26 18:37:35 CST |
| Injection Volume:  | 10.00 $\mu$ l            | Channel Name:    | V2489 ChA              |
| Run Time:          | 60.00 Minutes            | Channel Desc.:   | V2489 ChA.214nm        |
| Column Type:       |                          | Sample Set Name: |                        |

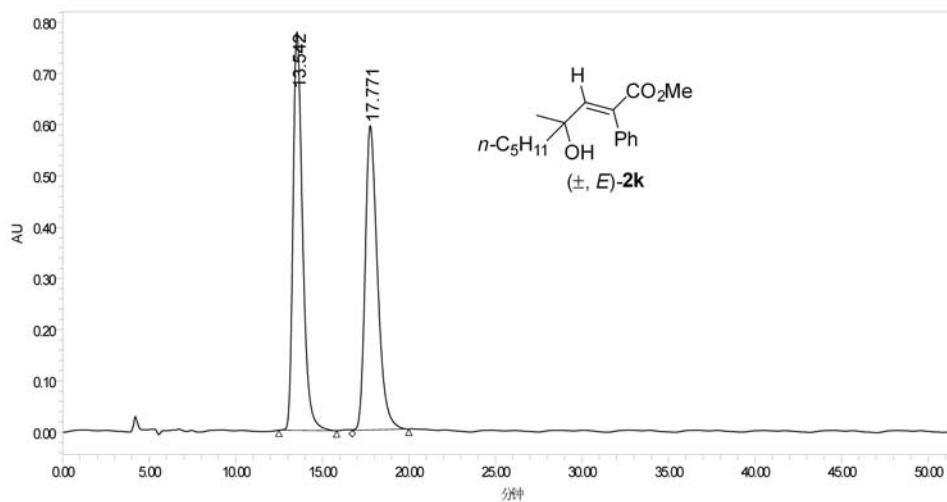

|   | RT (min) | Area (AU*sec) | %Area | Height (AU) | % Height |
|---|----------|---------------|-------|-------------|----------|
| 1 | 13.542   | 2973899E      | 50.3E | 77792E      | 56.71    |
| 2 | 17.771   | 2981820E      | 49.64 | 58879E      | 43.2E    |

| SAMPLE INFORMATION |                          |                  |                        |
|--------------------|--------------------------|------------------|------------------------|
| Sample Name:       | hcf-2-128-pa-295-5-1-214 | Acquired By:     | Breeze                 |
| Sample Type:       | 未知                       | Date Acquired:   | 2018/1/26 15:33:53 CST |
| Vial:              | 999                      | Acq. Method:     | zj95                   |
| Injection#:        | 233                      | Date Processed:  | 2018/1/26 18:40:14 CST |
| Injection Volume:  | 10.00 ul                 | Channel Name:    | V2489 ChA              |
| Run Time:          | 30.00 Minutes            | Channel Desc.:   | V2489 ChA.214nm        |
| Column Type:       |                          | Sample Set Name: |                        |

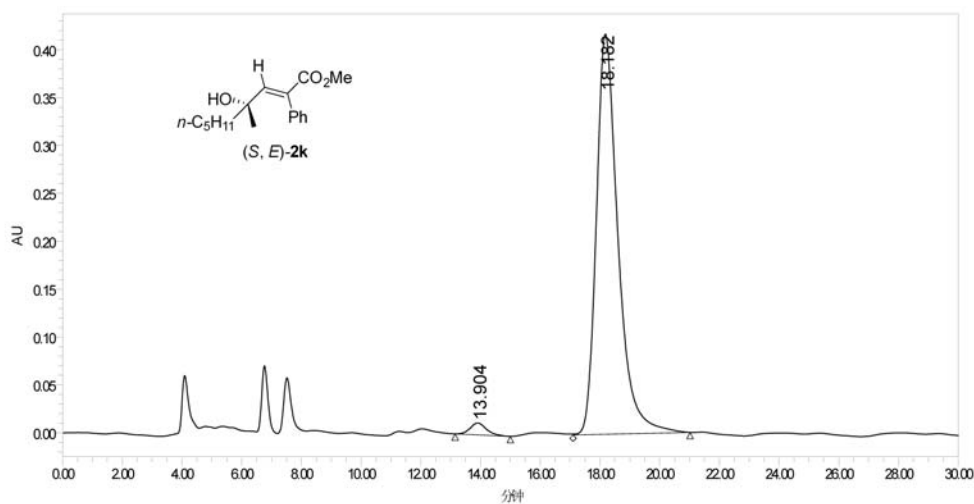

|   | RT (min) | Area (AU*sec) | %Area | Height (AU) | % Height |
|---|----------|---------------|-------|-------------|----------|
| 1 | 13.904   | 470302        | 2.16  | 12428       | 2.86     |
| 2 | 18.182   | 21048666      | 97.81 | 417942      | 97.11    |

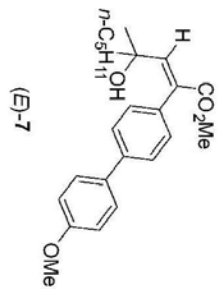

hcf-2-98-H  
 Jan 4 2018  
 SOLVENT: cdcl3  
 NA = 4  
 F1 = 399.749542 MHz  
 F2 = 100.526031 MHz

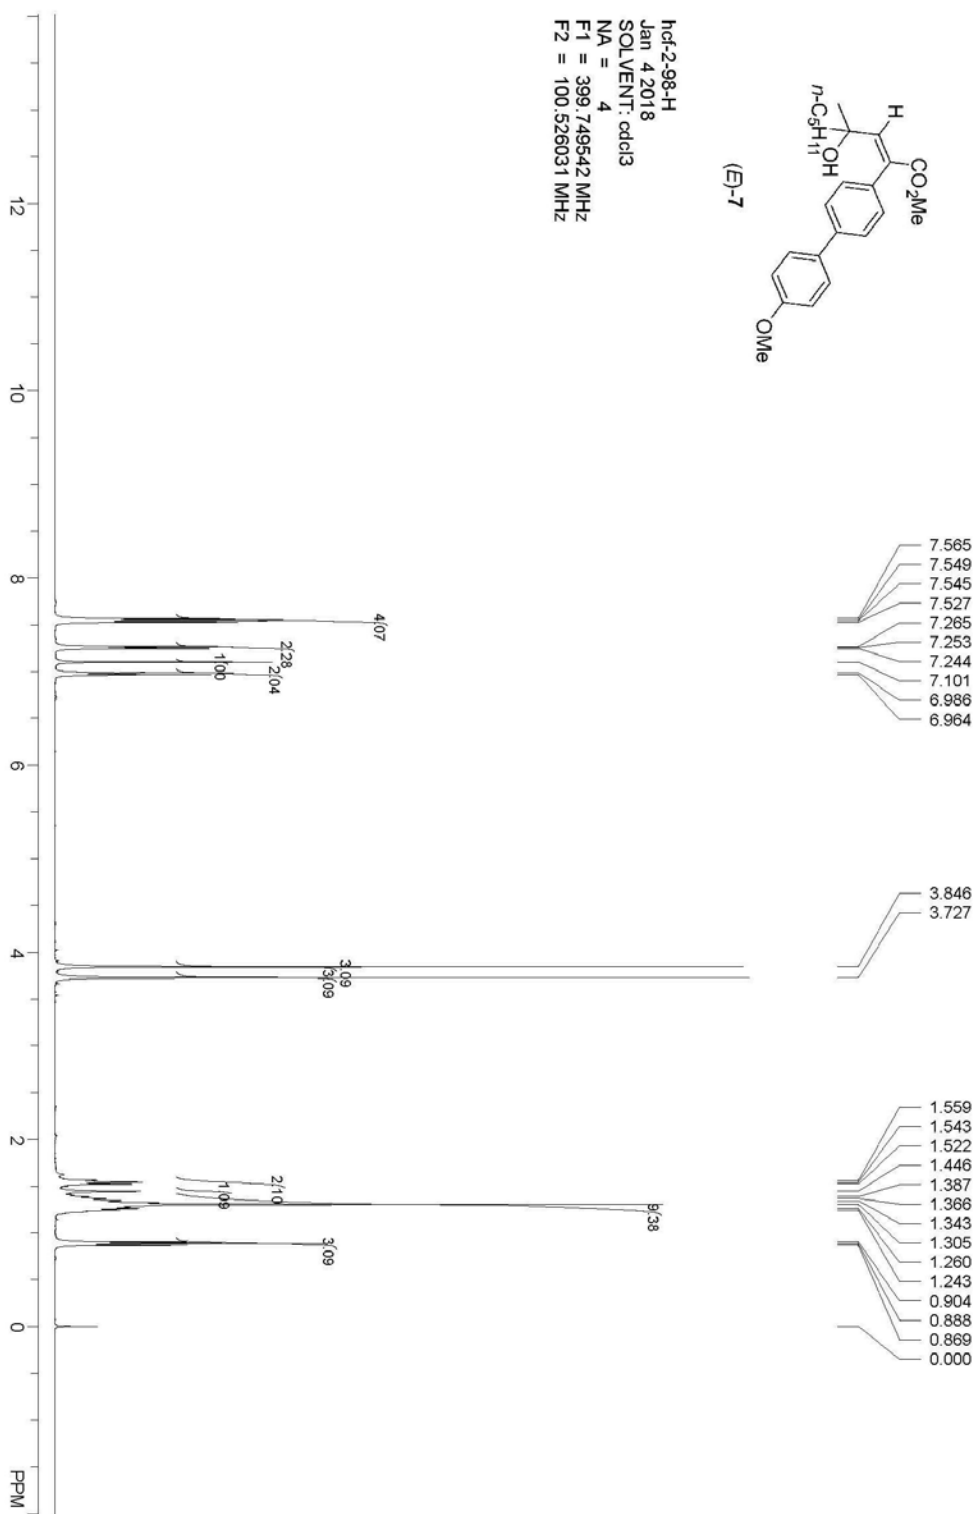

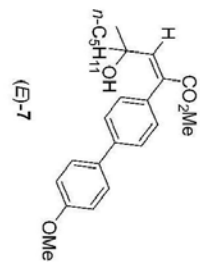

hcf-2-98-C  
 Jan 4 2018  
 SOLVENT: cdcl3  
 NA = 1000  
 F1 = 100.527557 MHz  
 F2 = 399.749146 MHz

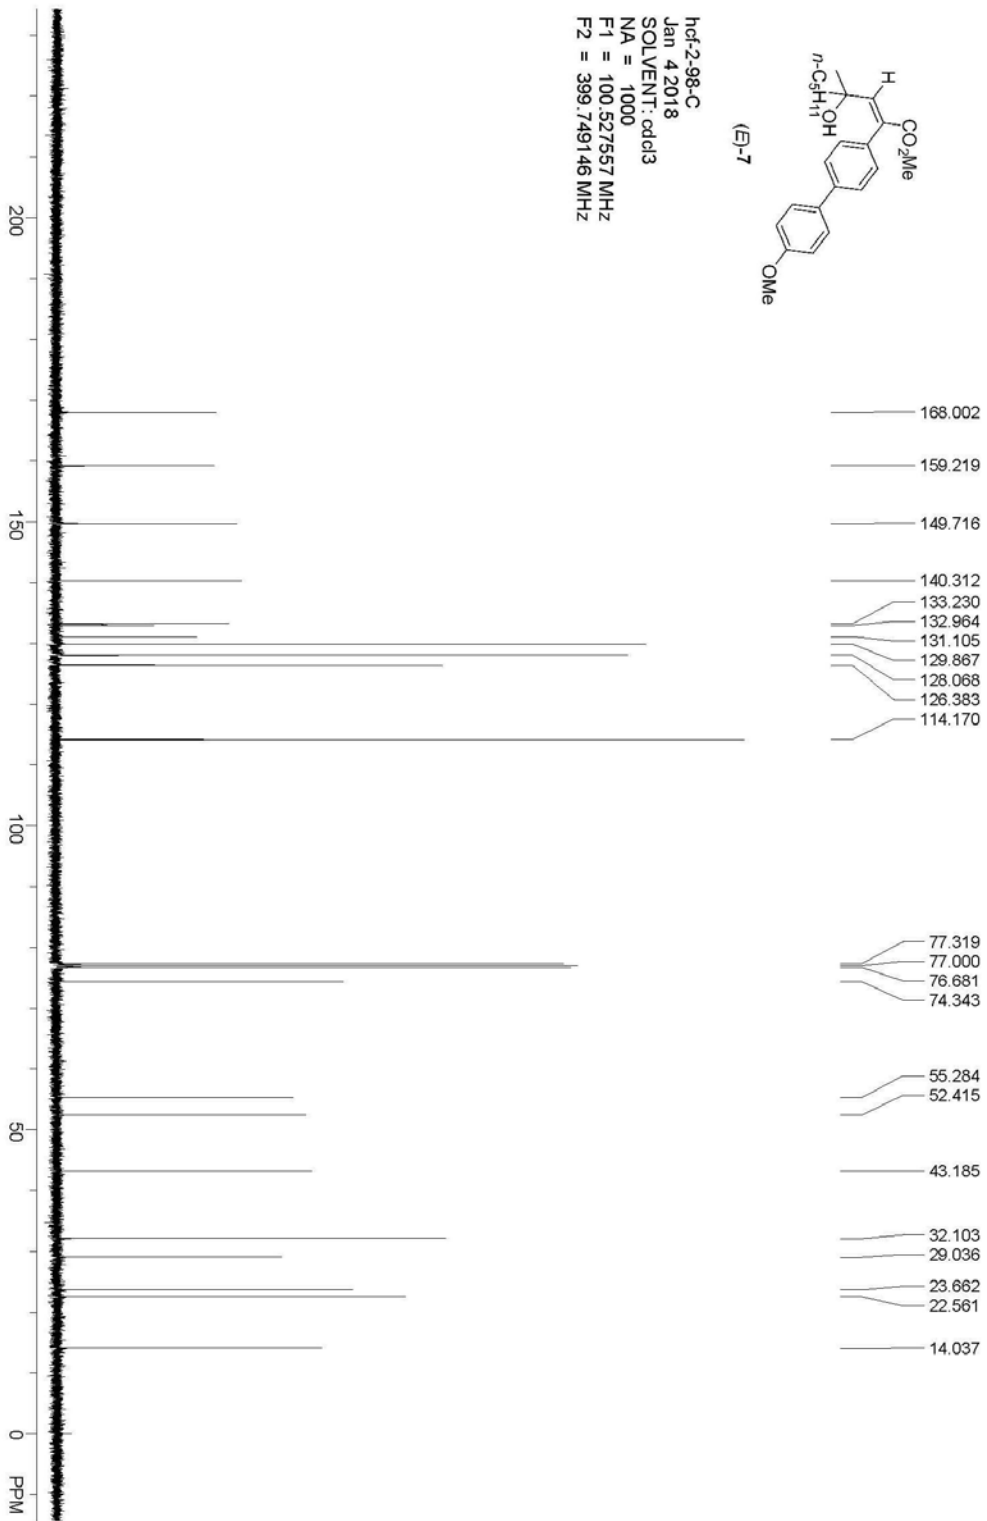

hcf-2-130-H  
 Jan 26 2018  
 SOLVENT: dmso  
 NA = 8  
 F1 = 399.751465 MHz  
 F2 = 100.526505 MHz

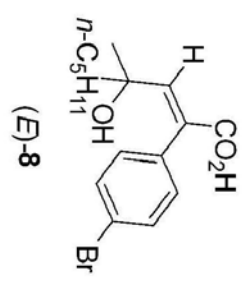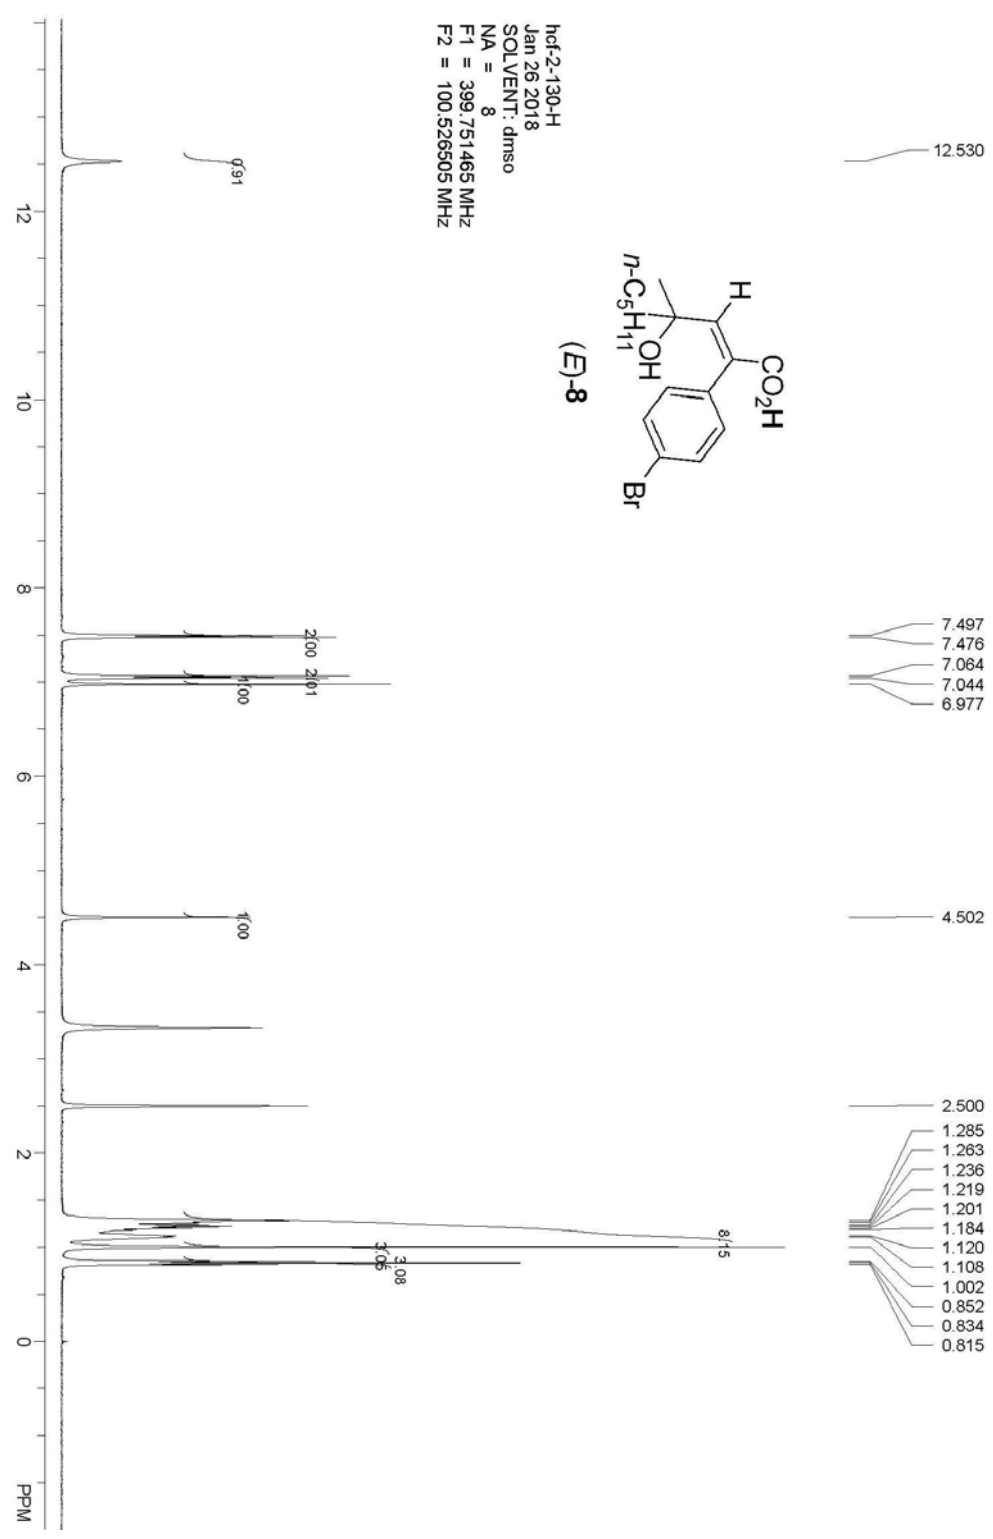

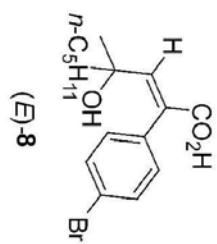

hnf-2-130-C  
 Jan 26 2018  
 SOLVENT: dmso-d6  
 NA = 512  
 F1 = 100.528038 MHz  
 F2 = 399.751038 MHz

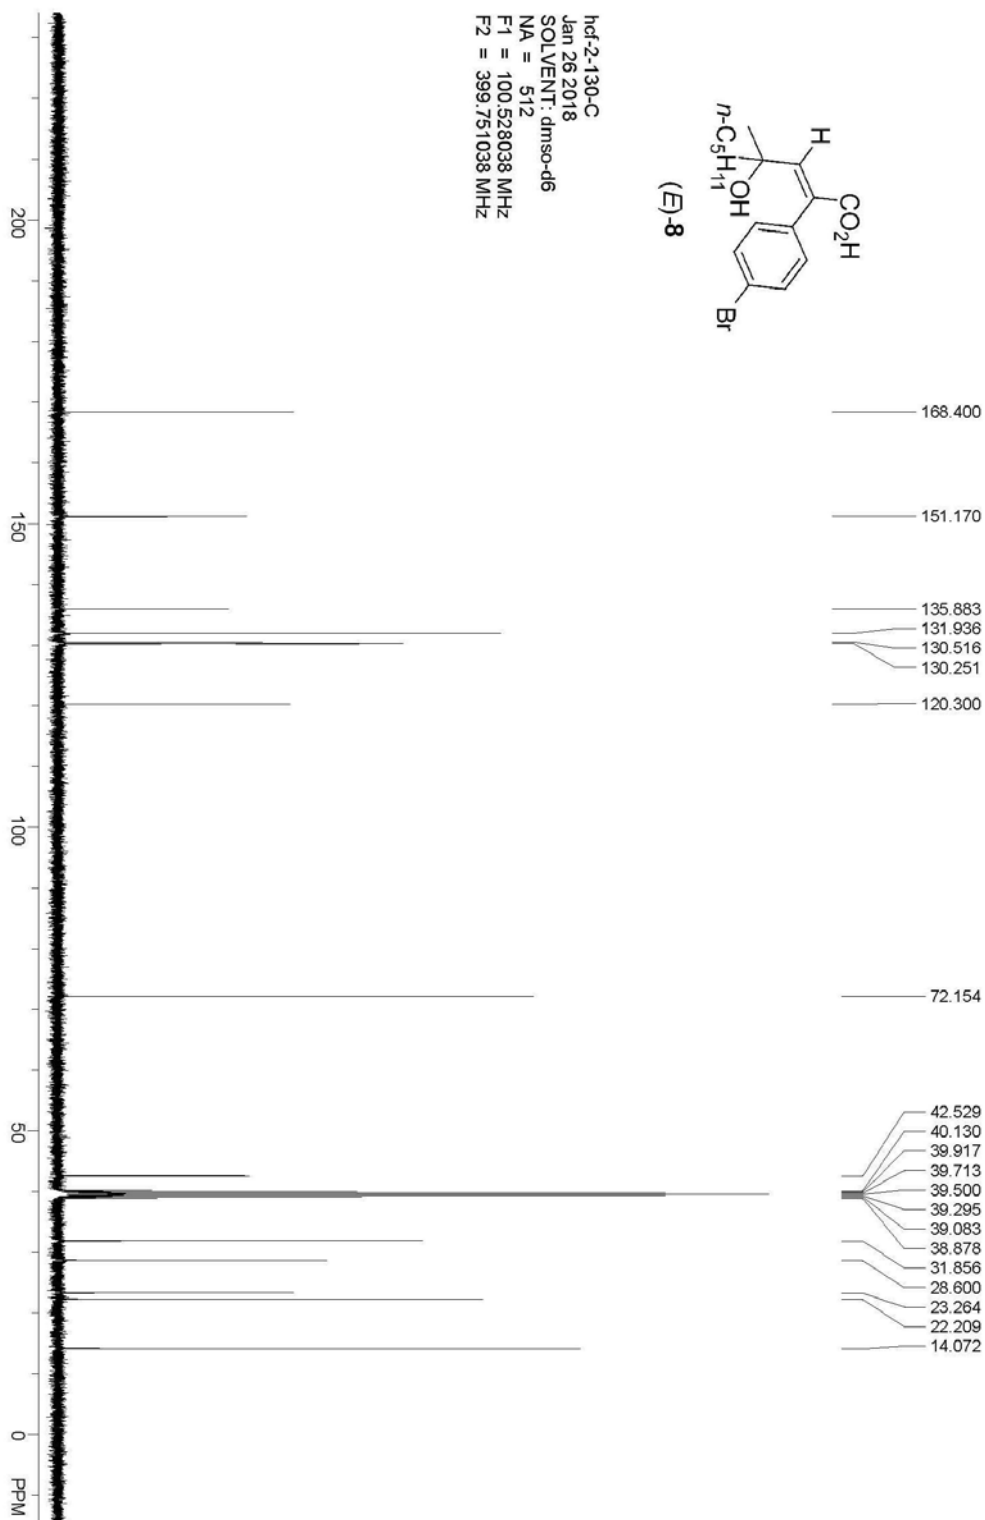



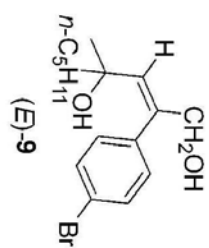

hcf-2-134-H  
 Feb 1 2018  
 SOLVENT: cdcl3  
 NA = 4  
 F1 = 399.749542 MHz  
 F2 = 100.526031 MHz

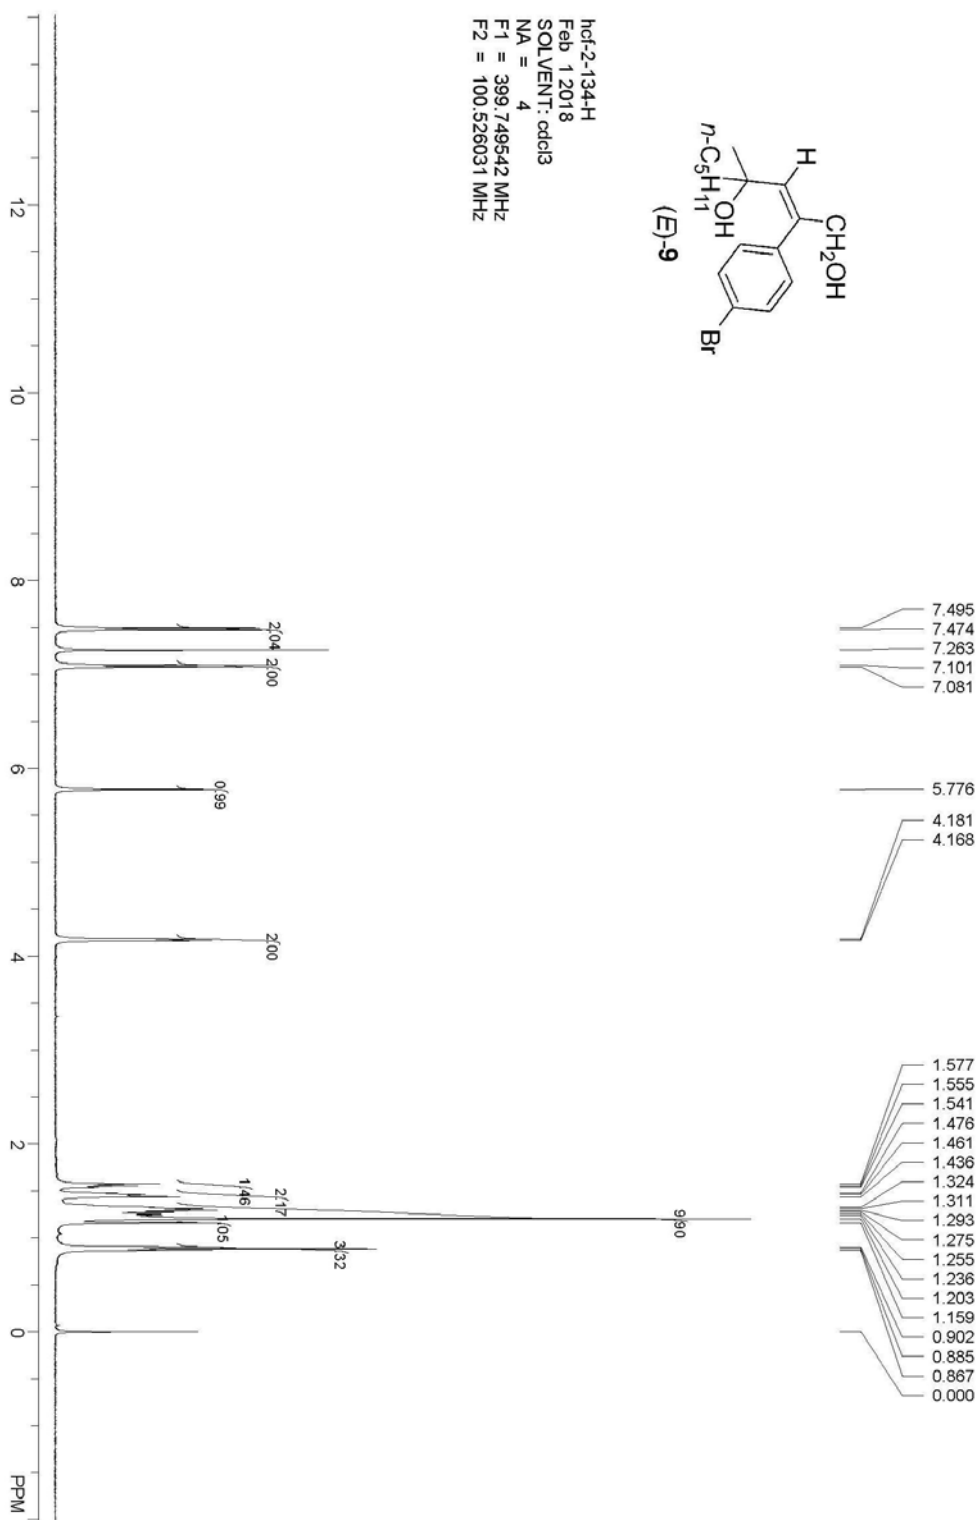

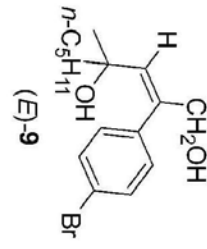

hcf-2-134-C  
 Feb 2 2018  
 SOLVENT: cdcl3  
 NA = 512  
 F1 = 100.527557 MHz  
 F2 = 399.749146 MHz

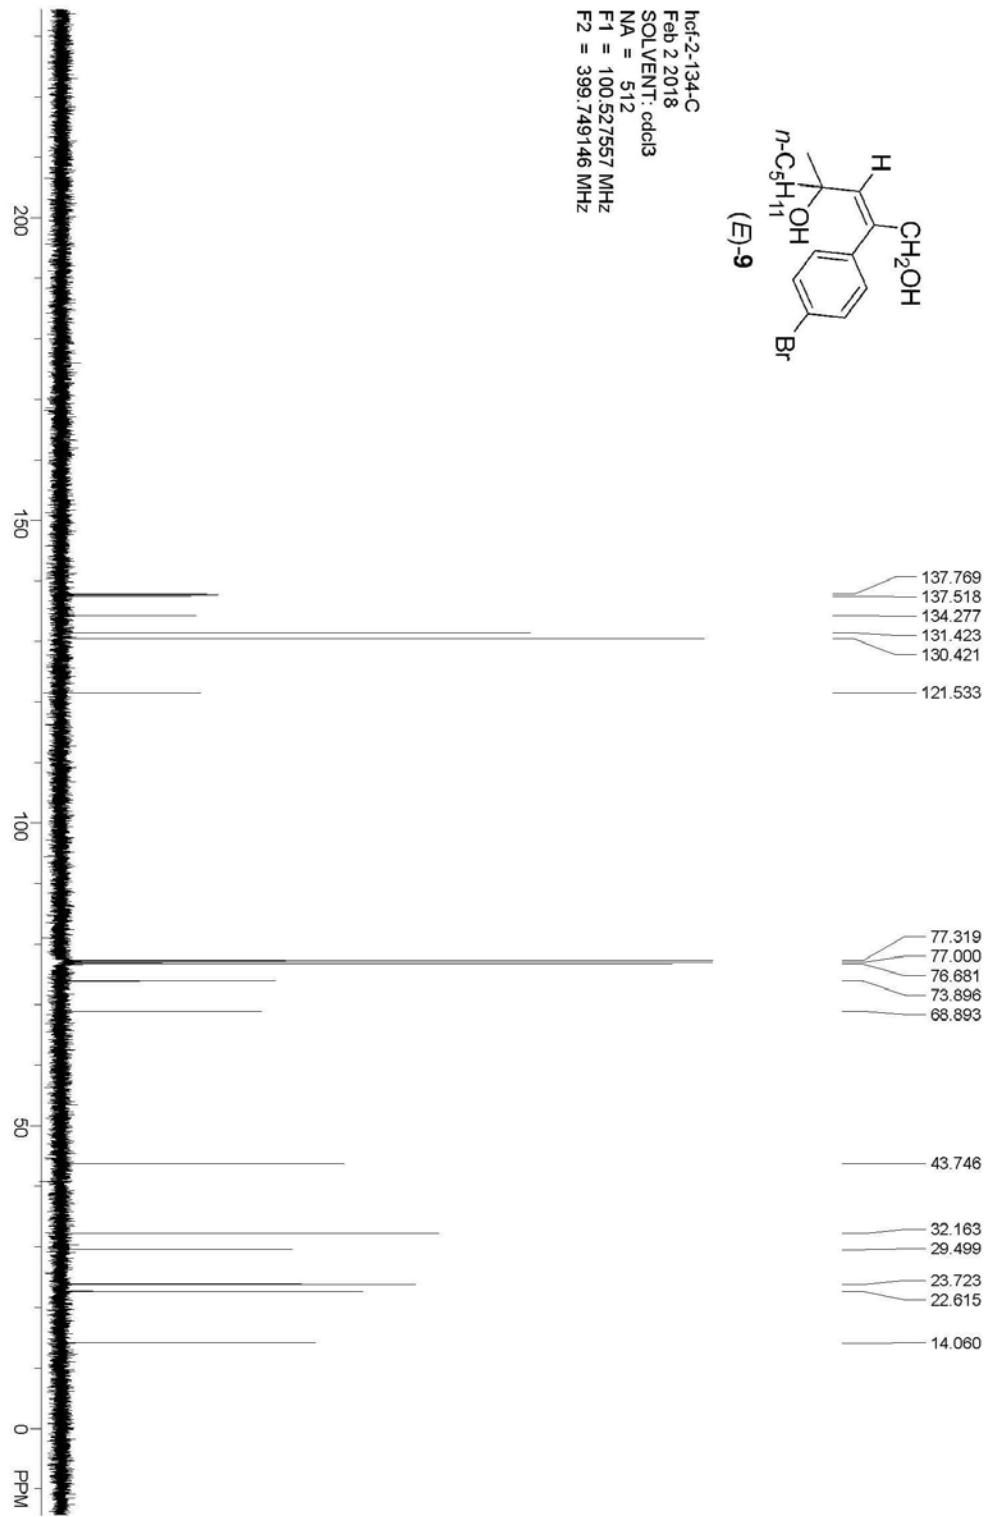

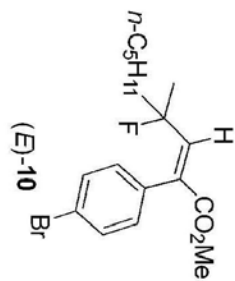

hcf-2-158-H  
 Mar 16 2018  
 SOLVENT: cdcl3  
 NA = 4  
 F1 = 399.749542 MHz  
 F2 = 100.526031 MHz

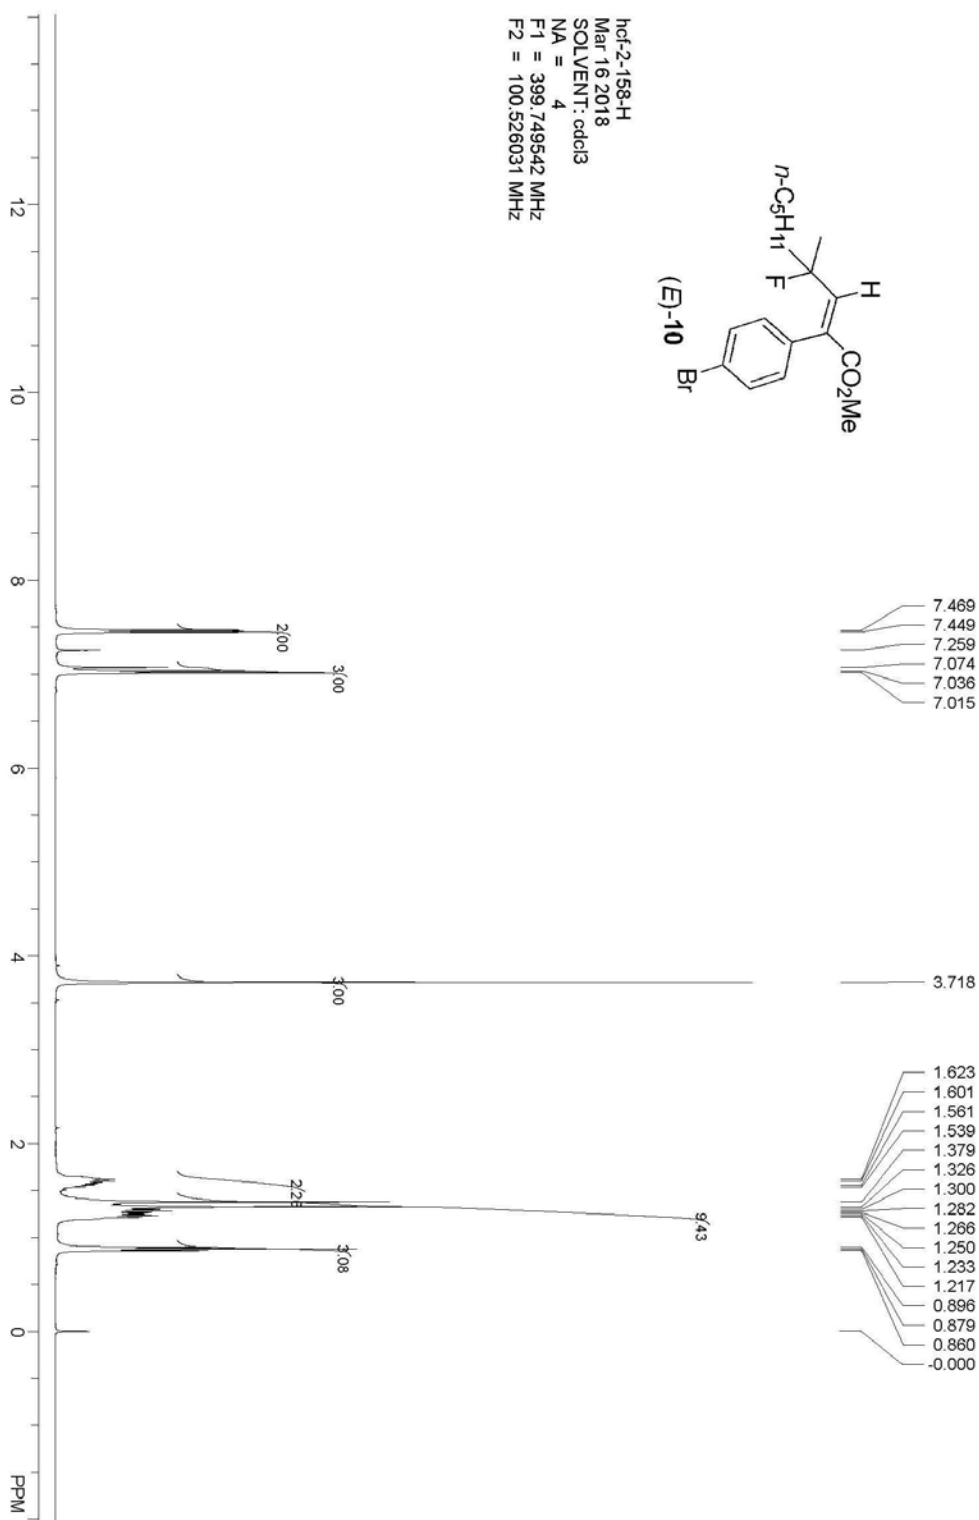

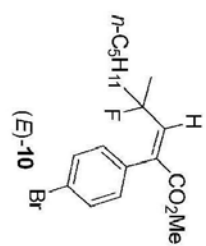

hcf-2-158-C  
 Mar 16 2018  
 SOLVENT: cdcl3  
 NA = 512  
 F1 = 100.527557 MHz  
 F2 = 399.749146 MHz

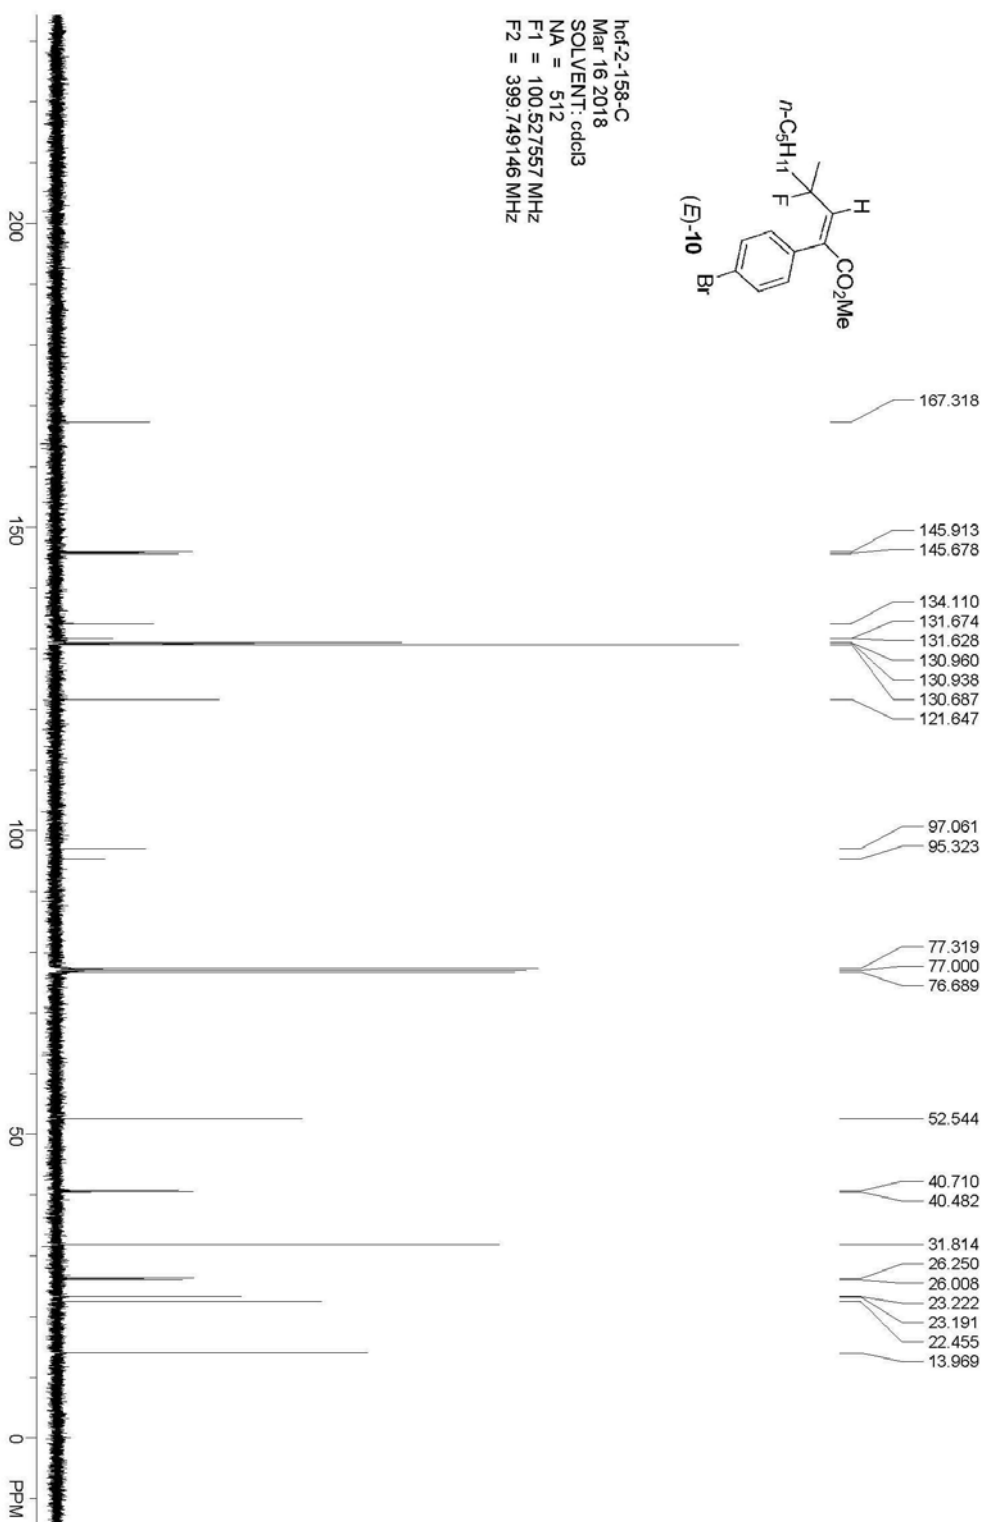



hcf-2-182B-cr  
 May 30 2018  
 SOLVENT: CDCl3  
 NA = 16  
 F1 = 400.130005 MHz  
 F2 = 1.000000 MHz

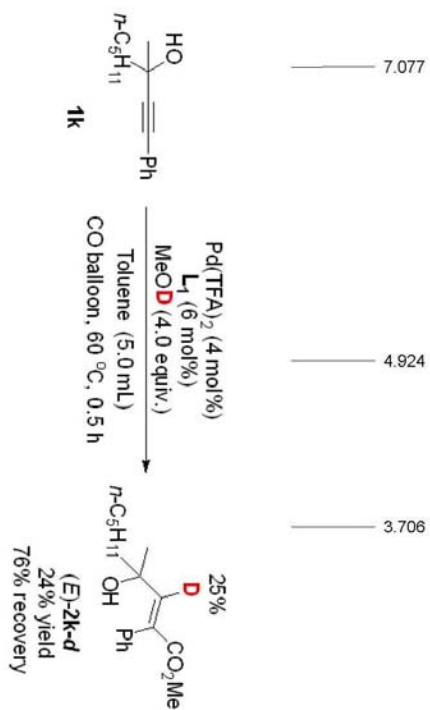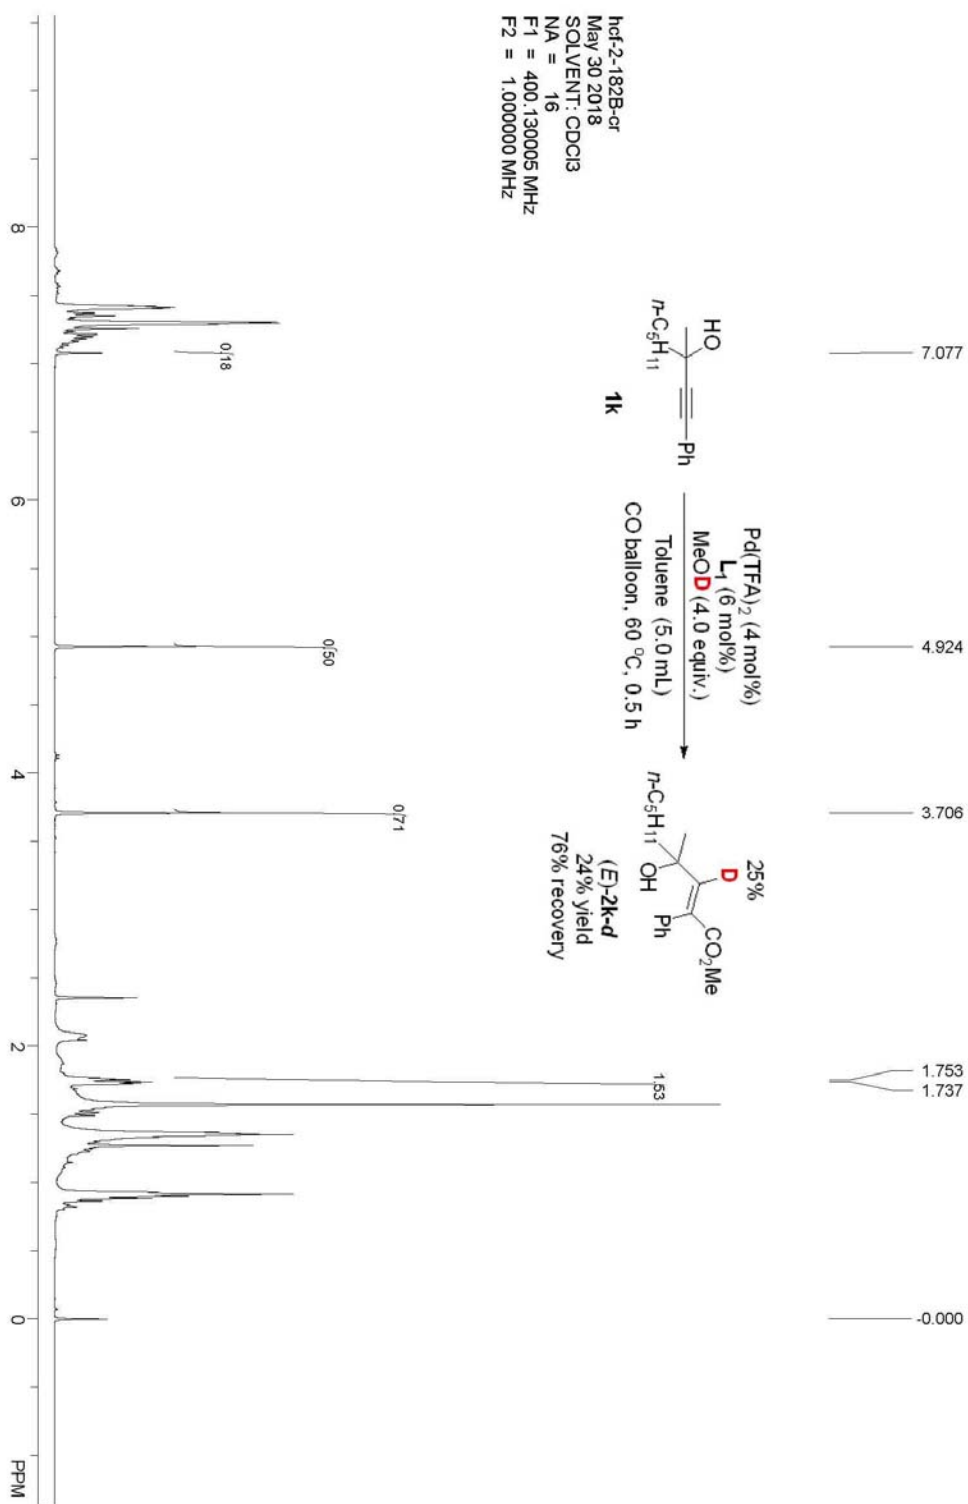

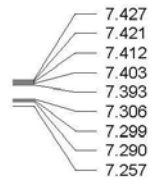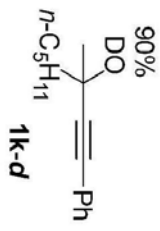

hcf-3-169-H  
Mar-19-2019  
SOLVENT: CDCl<sub>3</sub>  
NA = 4  
F1 = 400.130005 MHz  
F2 = 1.000000 MHz

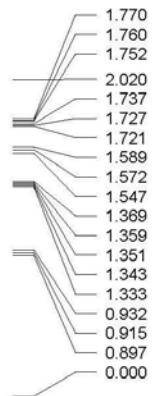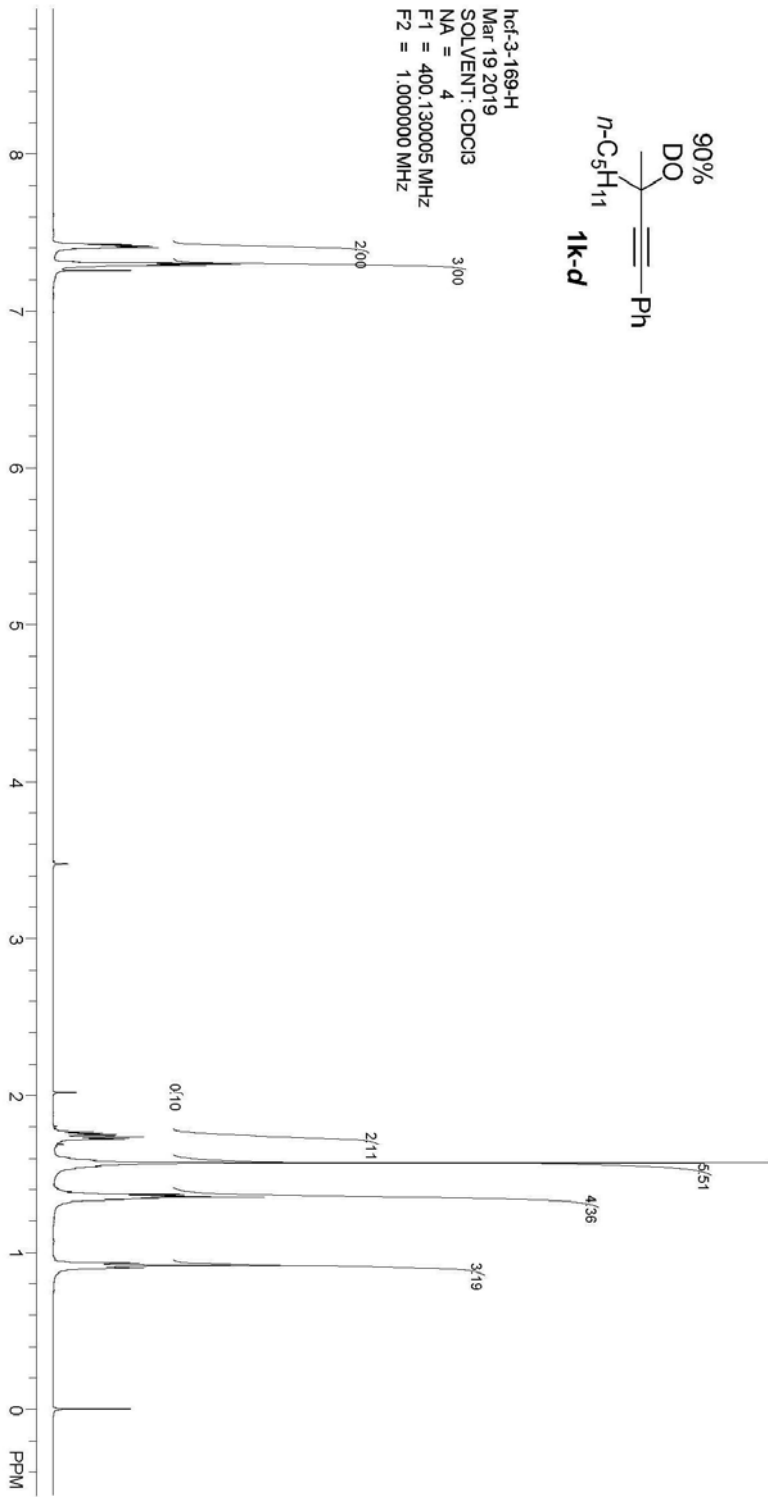

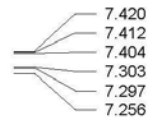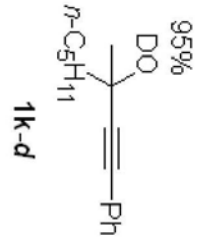

hcf-3-93-H  
Dec 10 2018  
SOLVENT: CDCl<sub>3</sub>  
NA = 4  
F1 = 400.130005 MHz  
F2 = 1.000000 MHz

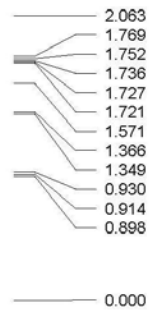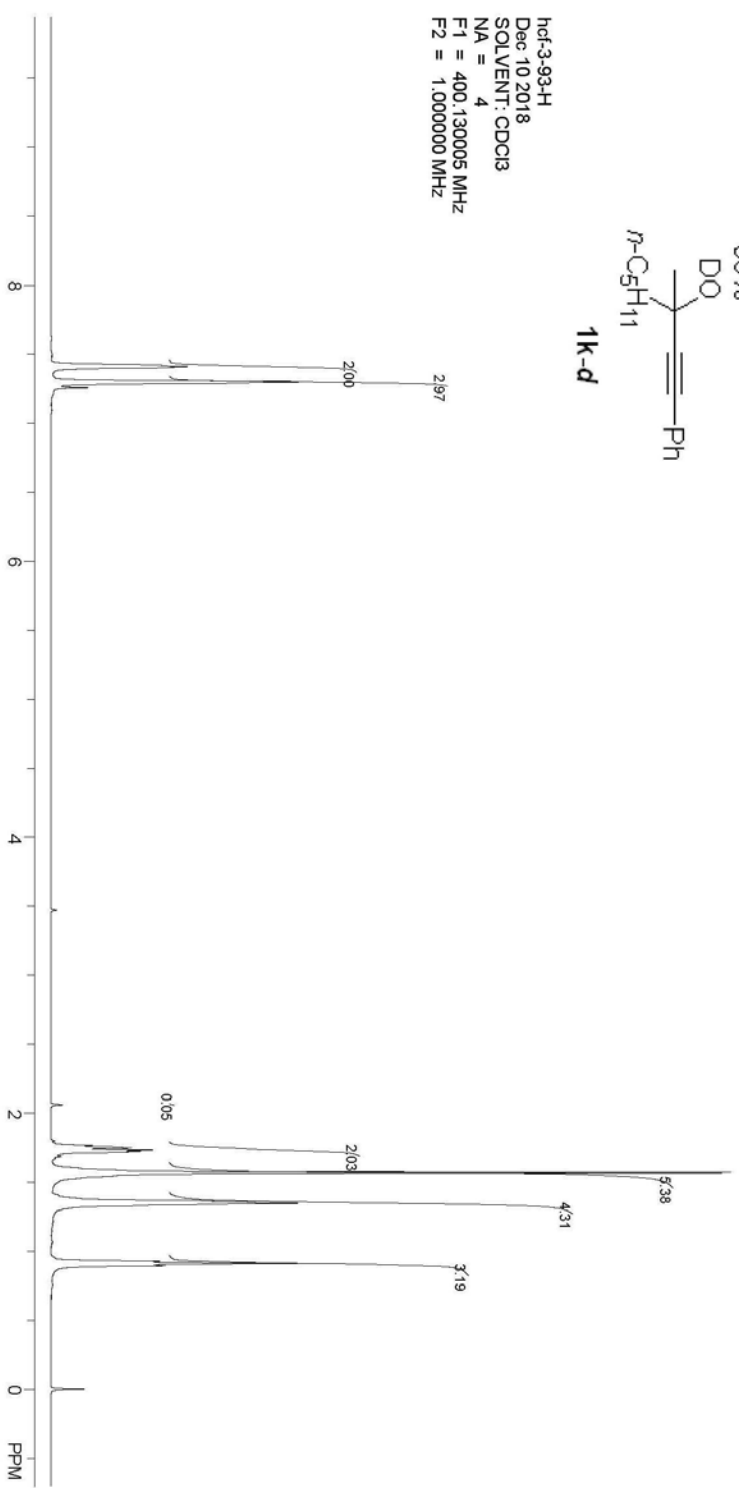



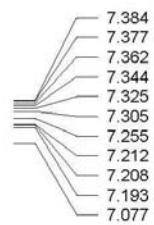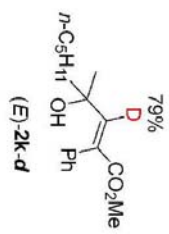

hcf-3-170-H  
 Mar 21 2019  
 SOLVENT: CDCl<sub>3</sub>  
 NA = 4  
 F1 = 400.130005 MHz  
 F2 = 1.000000 MHz

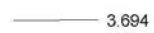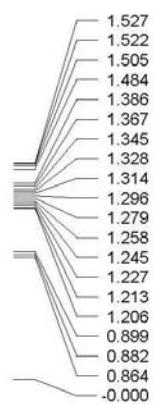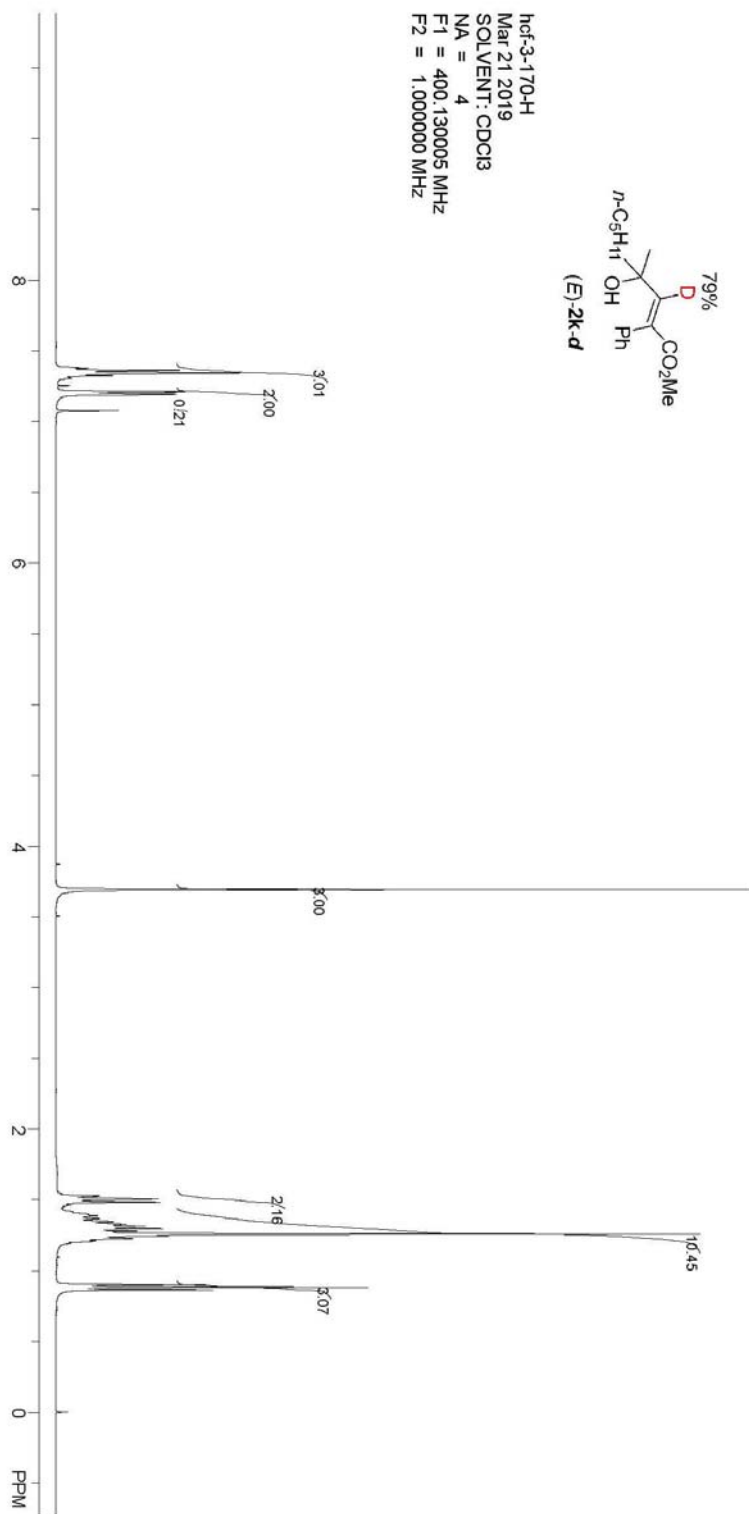

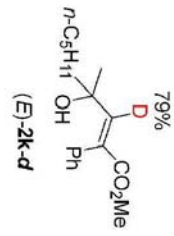

hcf-3-170-C  
 Mar 21 2019  
 SOLVENT: CDCl3  
 NA = 1024  
 F1 = 100.612770 MHz  
 F2 = 1.000000 MHz

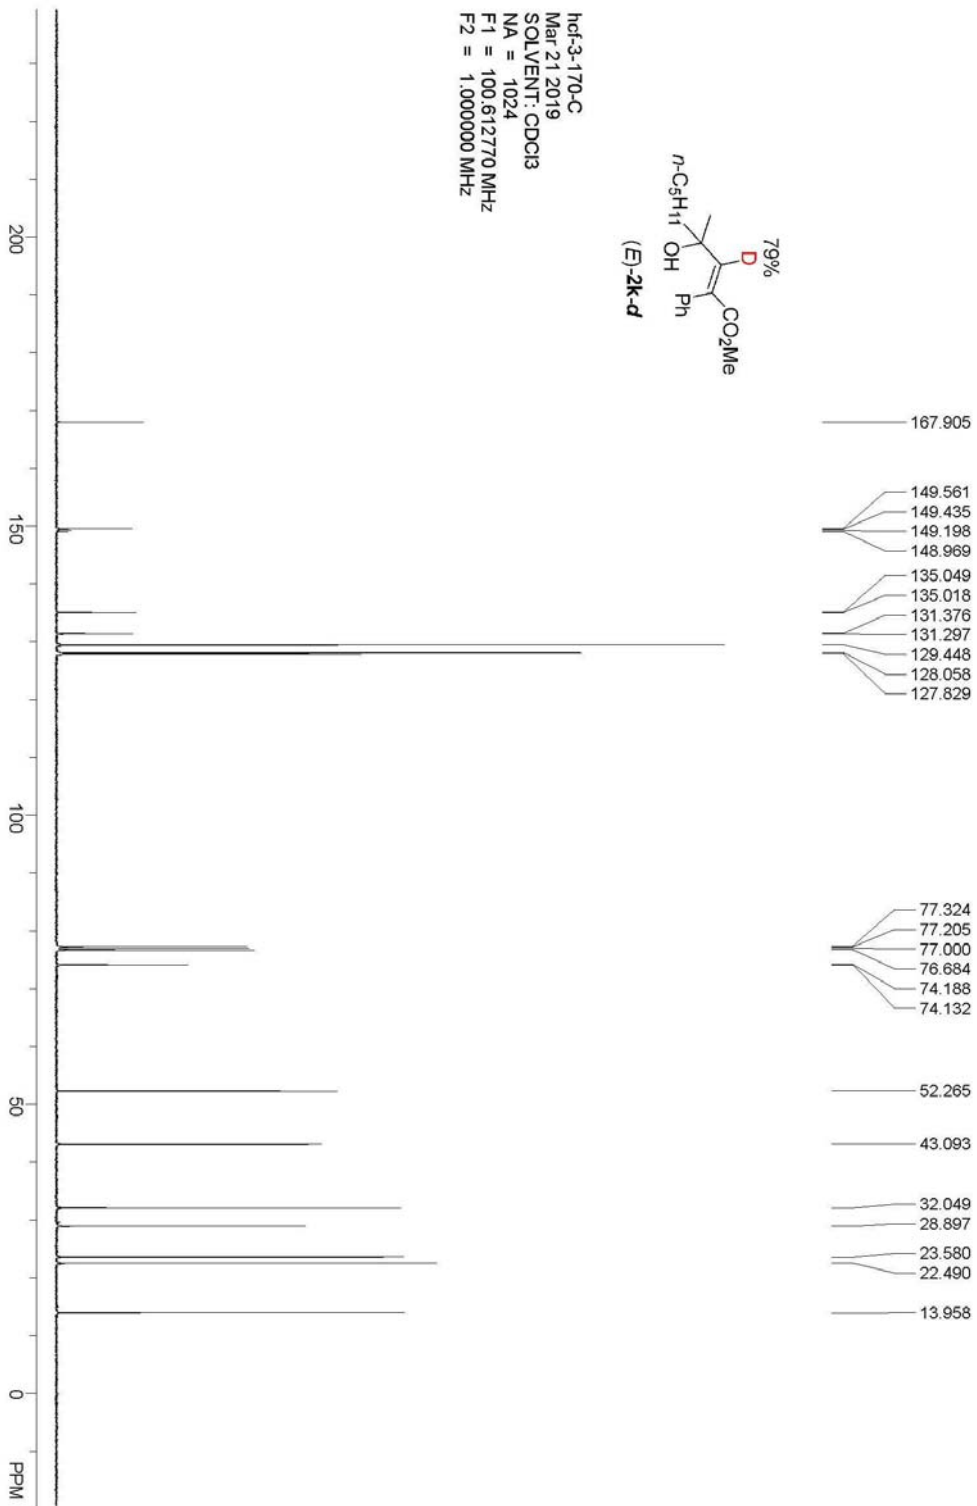

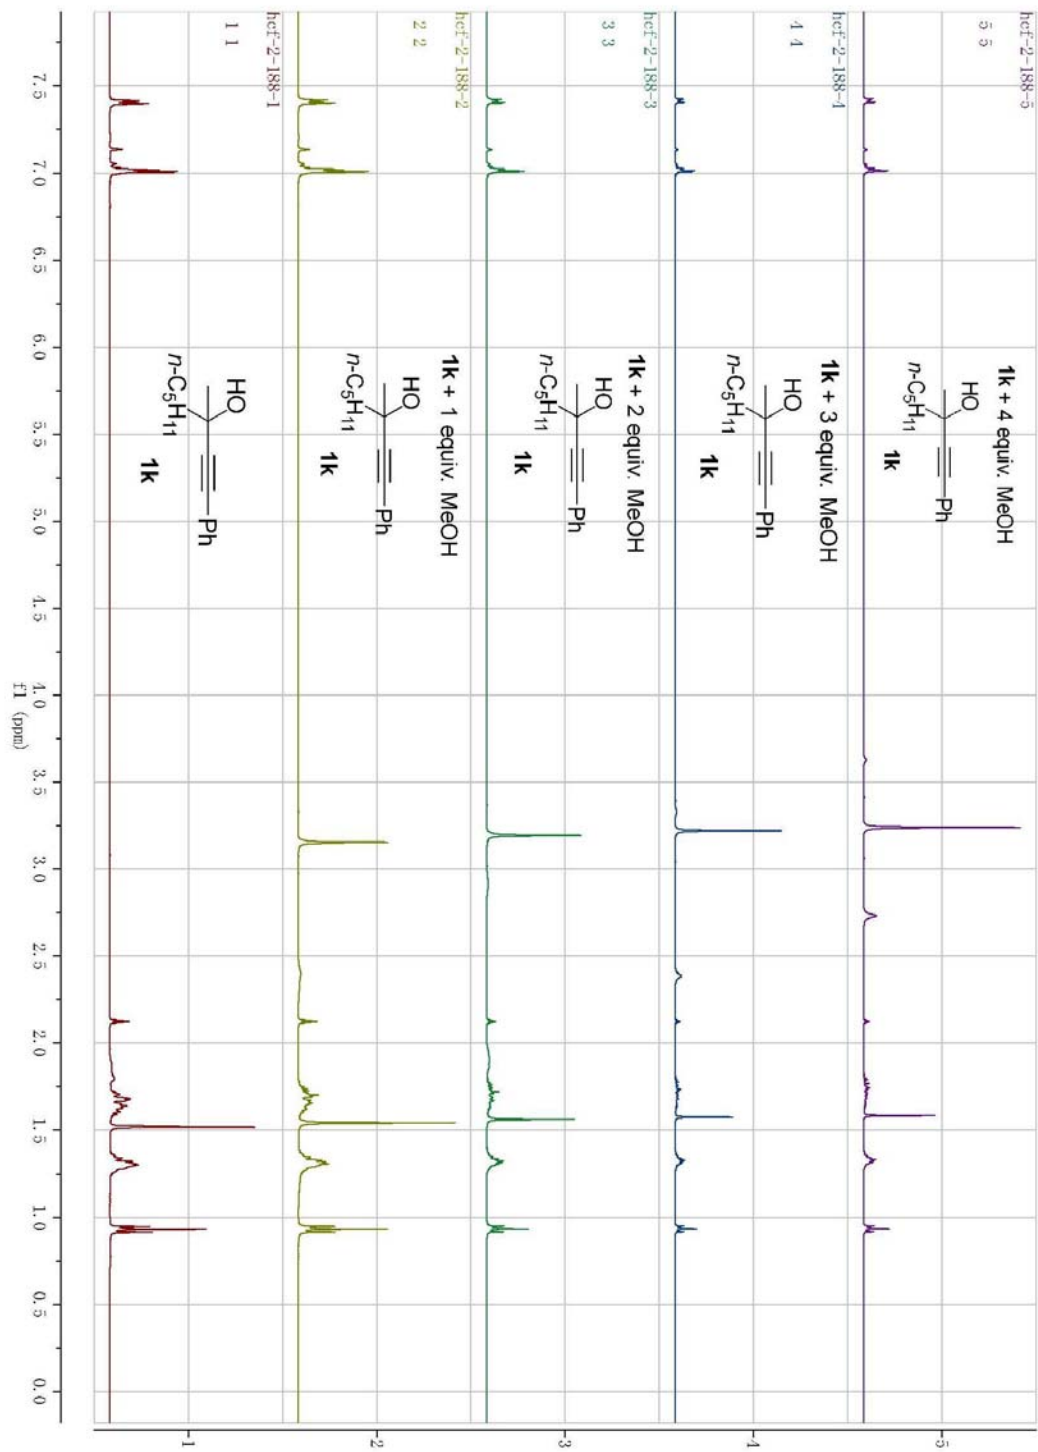

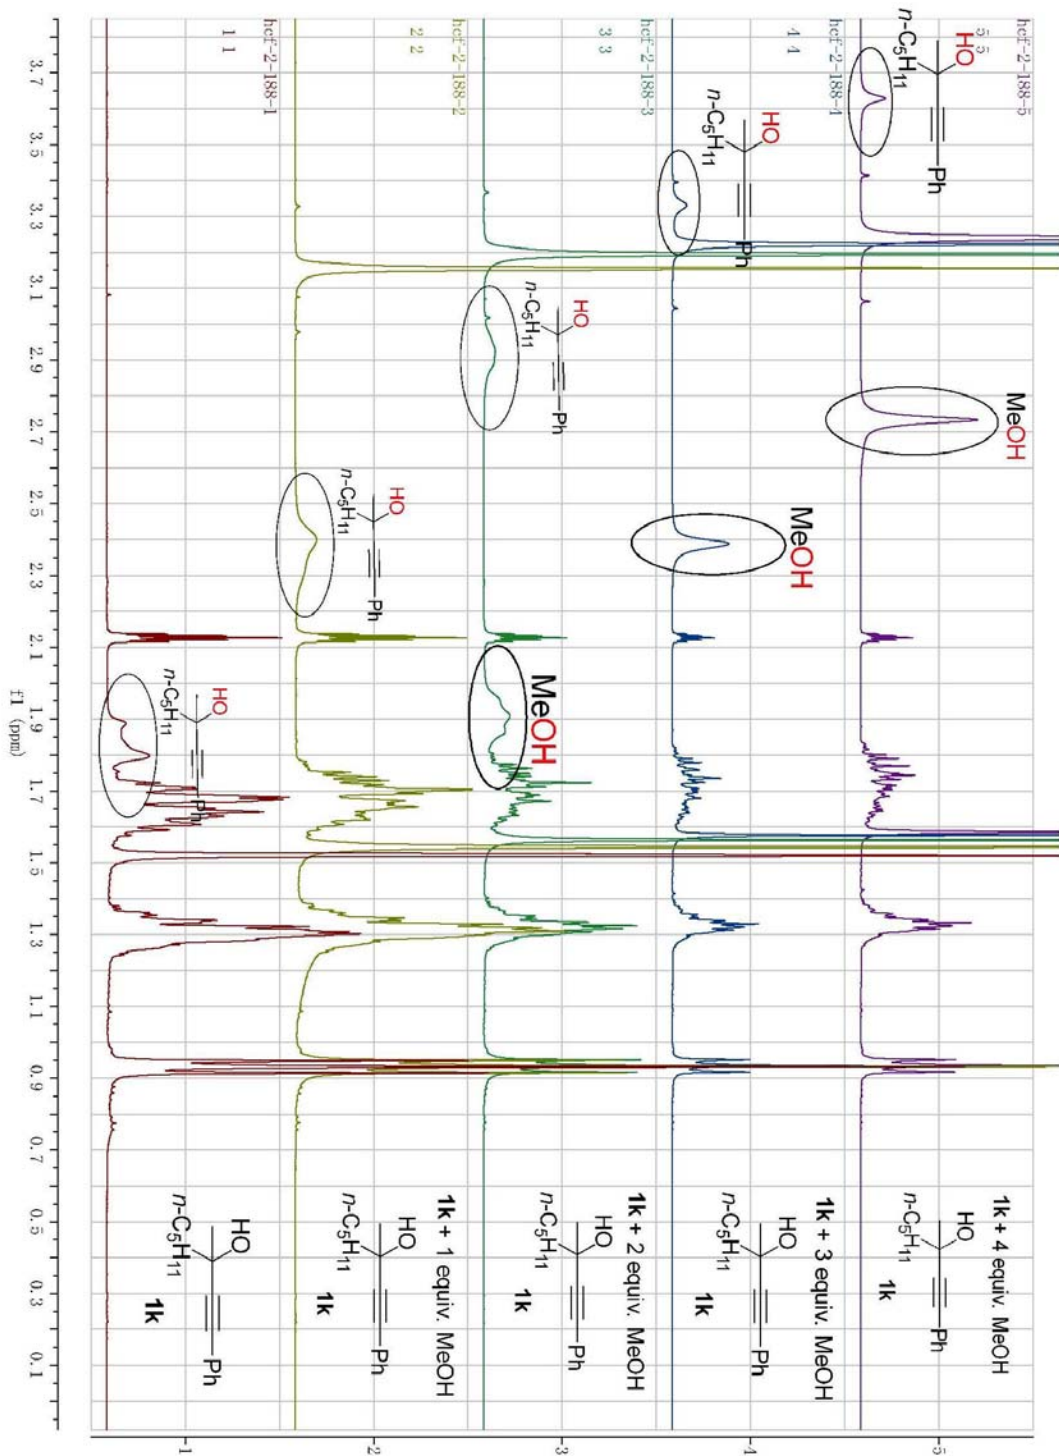

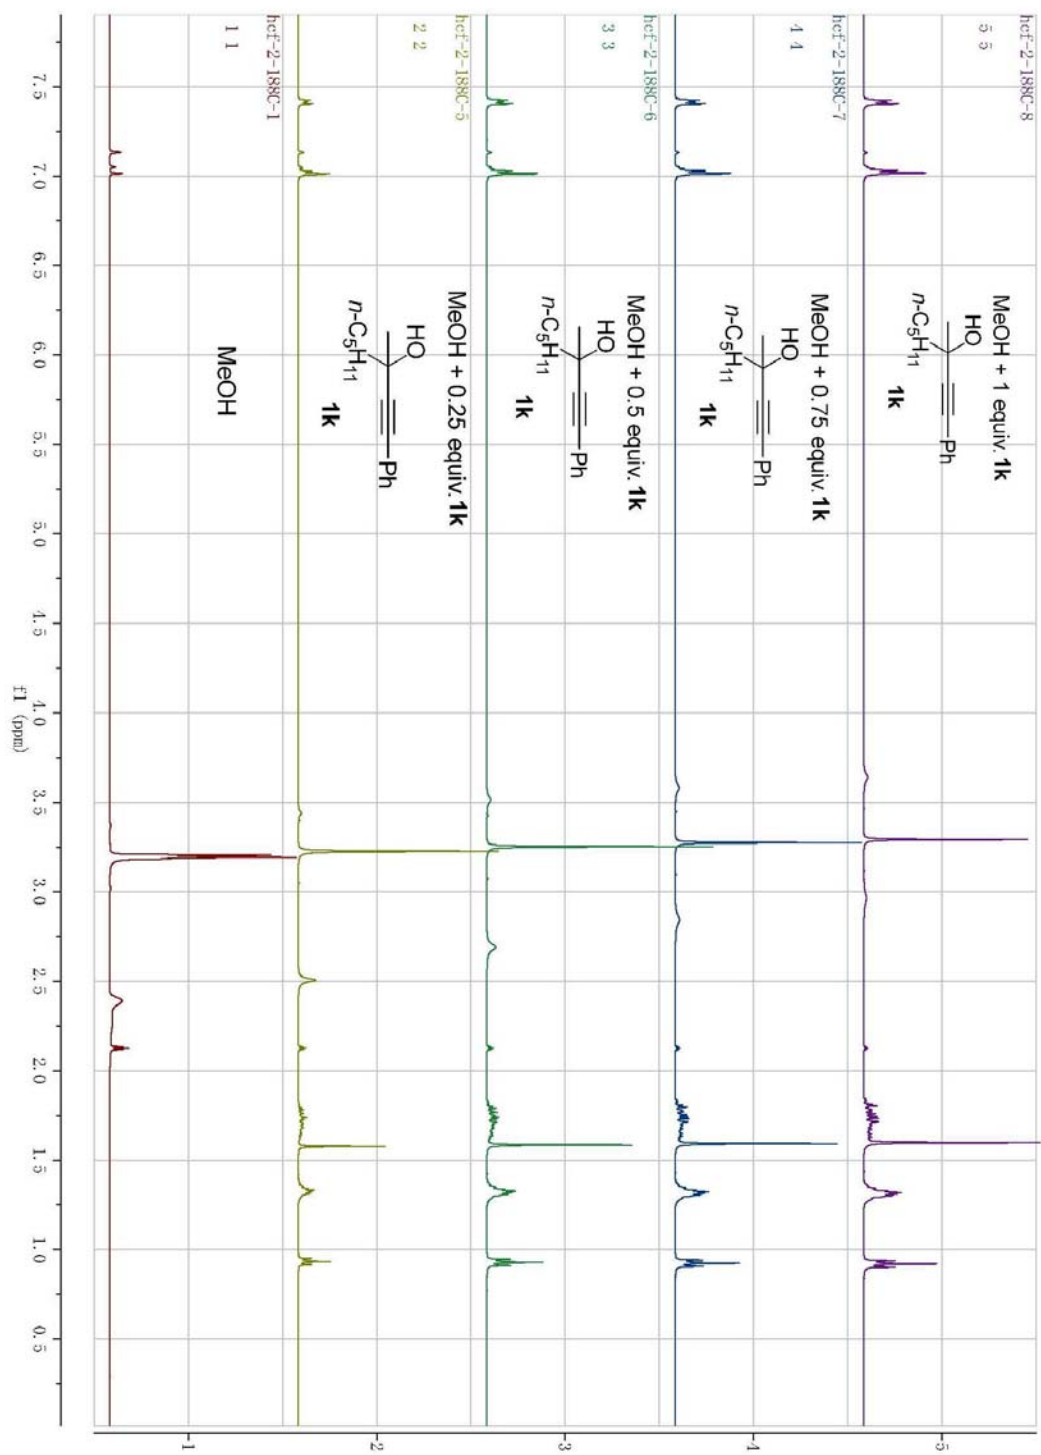

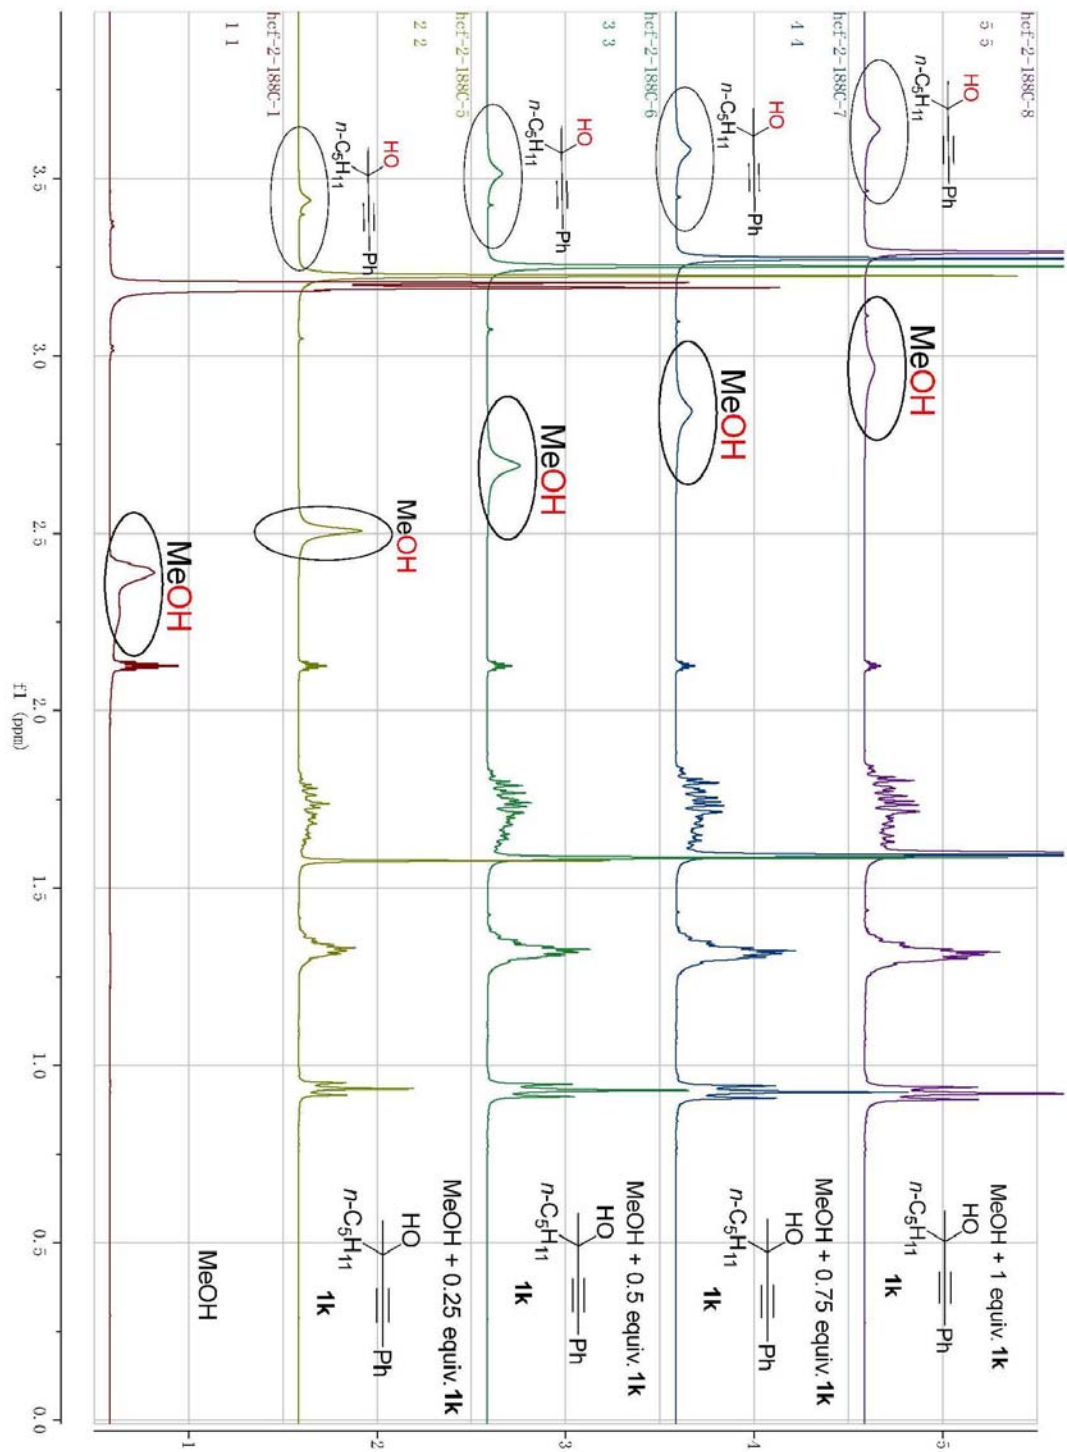

hol-3-23-H  
Sat Dec 22 09:48:08 2018  
SOLVENT: CDCl3  
NA = 4  
F1 = 400.132477 MHz  
F2 = 1.000000 MHz

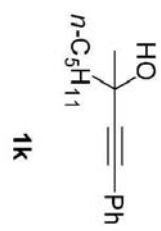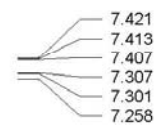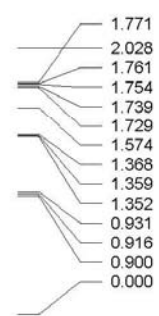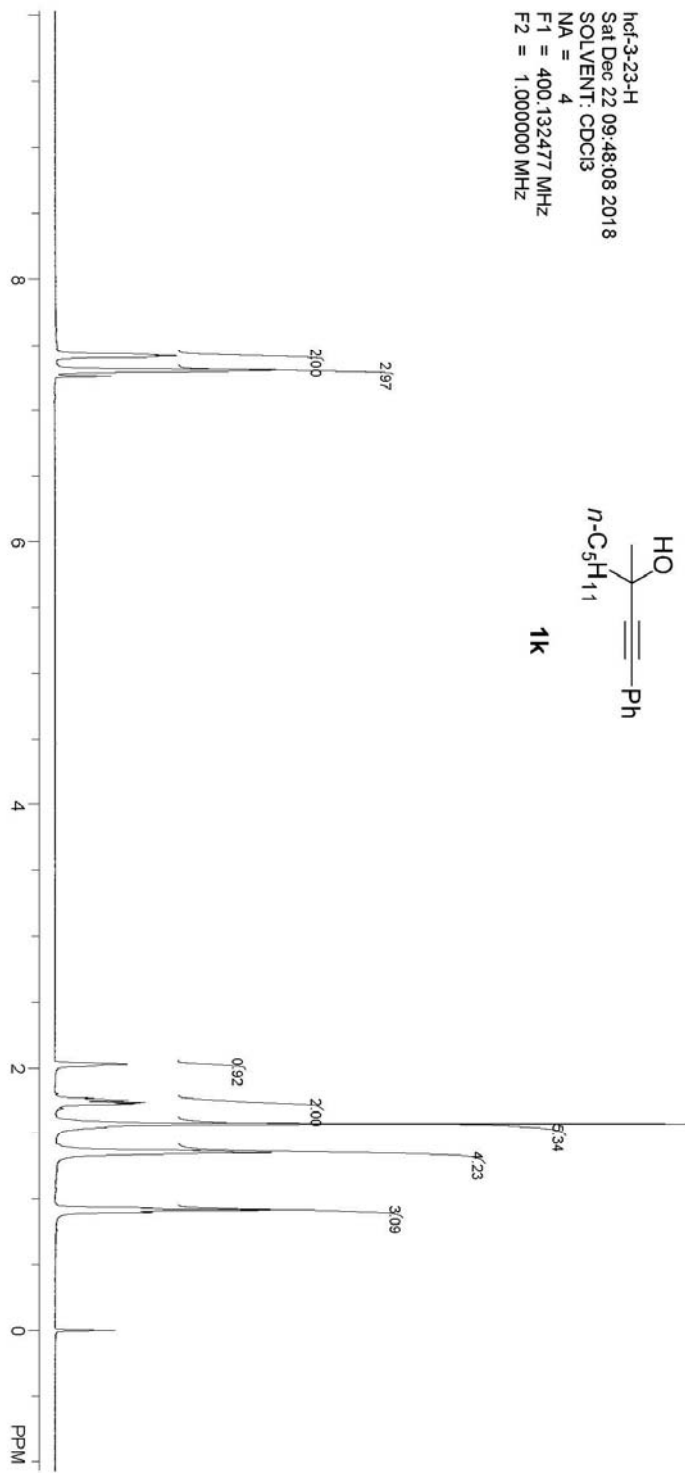

7.427  
7.421  
7.413  
7.405  
7.307  
7.300  
7.292  
7.262

3.465  
3.401

1.771  
1.761  
2.077  
1.752  
1.737  
1.728  
1.722  
1.689  
1.572  
1.530  
1.369  
1.351  
0.915  
0.898  
0.000

hot-3-109-1  
Sat Dec 22 09:50:40 2018  
SOLVENT: CDCl3  
NA = 4  
F1 = 400.132477 MHz  
F2 = 1.000000 MHz

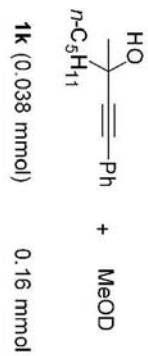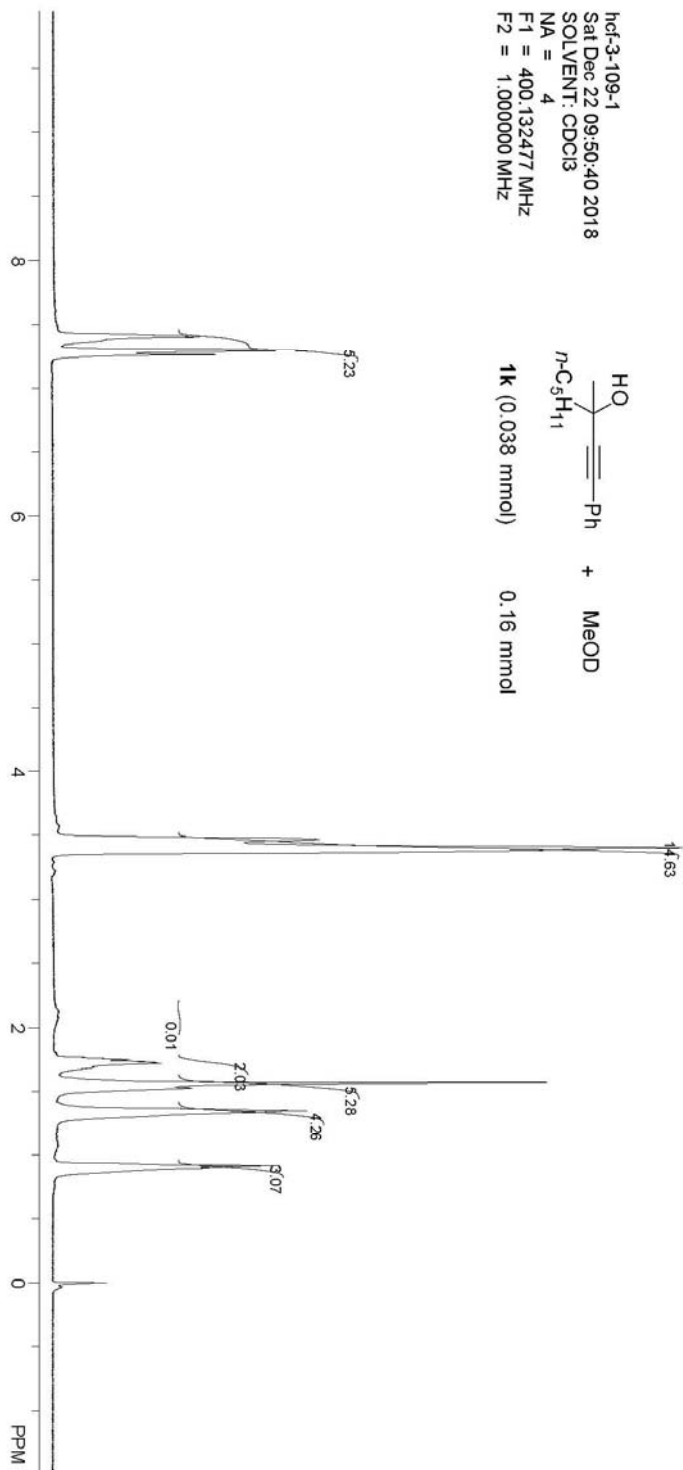



7.404  
7.300  
7.297  
7.292  
7.260

3.468  
3.425

2.081  
1.752  
1.728  
1.722  
1.572  
1.544  
1.351  
0.913  
0.898

0.000

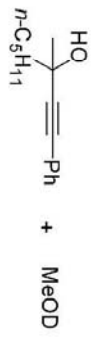

1k (0.038 mmol)    0.16 mmol

hdf-3-109-2  
Sat Dec 22 09:53:12 2018  
SOLVENT: CDCl<sub>3</sub>  
NA = 4  
F1 = 400.132477 MHz  
F2 = 1.000000 MHz

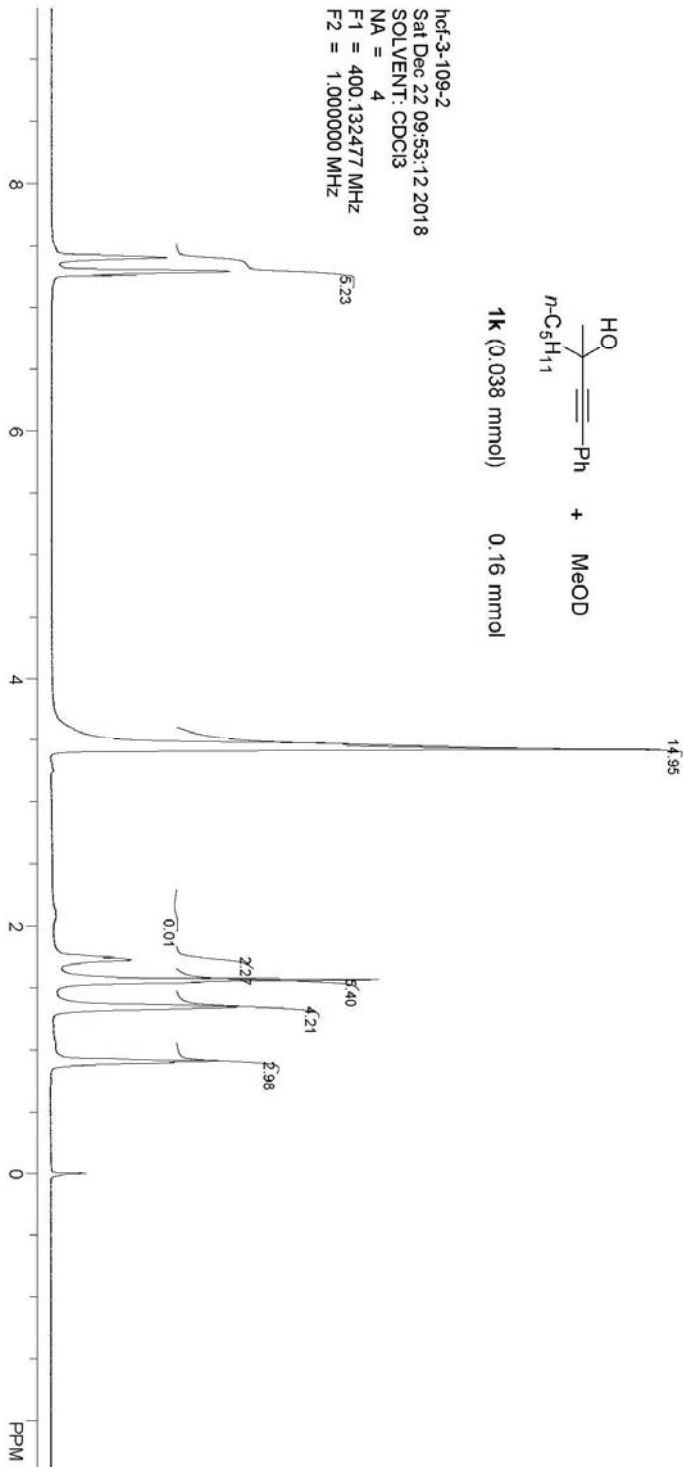

7.413  
7.405  
7.300  
7.295  
7.292  
7.262

3.433

2.074  
1.771  
1.753  
1.738  
1.729  
1.722  
1.572  
1.551  
1.352  
0.916  
0.901

0.000

hcf-3-109-3  
Sat Dec 22 09:55:44 2018  
SOLVENT: CDCl3  
NA = 4  
F1 = 400.132477 MHz  
F2 = 1.000000 MHz

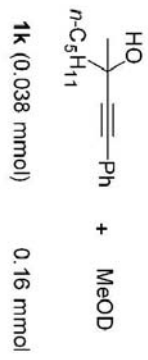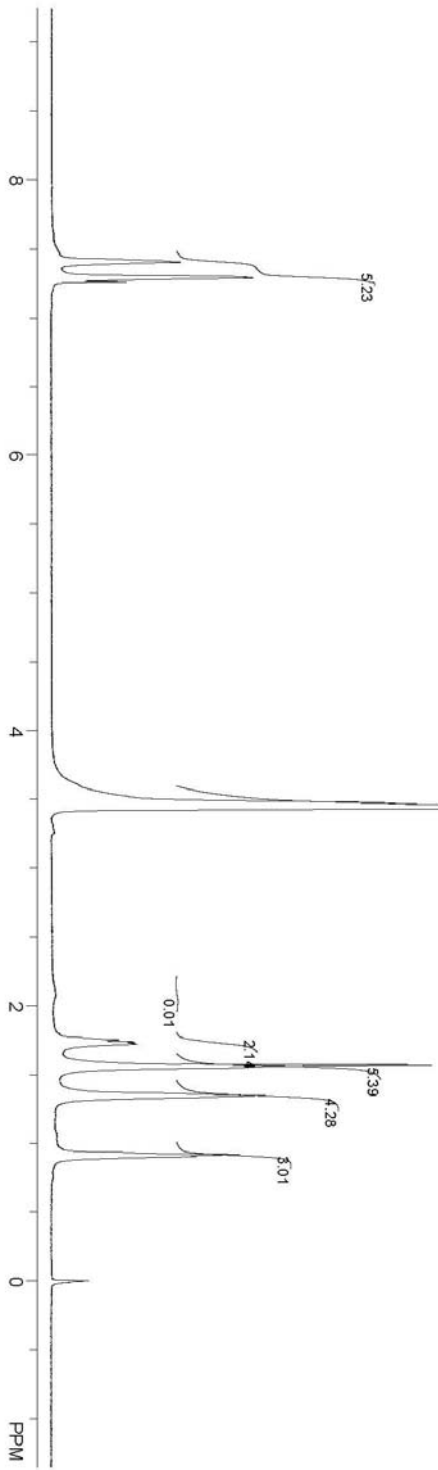

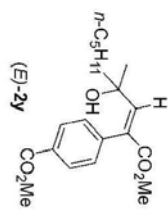

hcf-3-155-H  
 Mar 11 2019  
 SOLVENT: CDCl3  
 NA = 8  
 F1 = 400.130005 MHz  
 F2 = 1,000,000 MHz

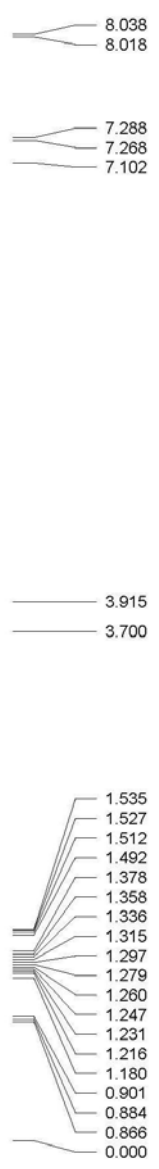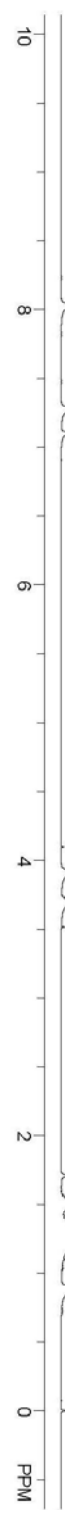

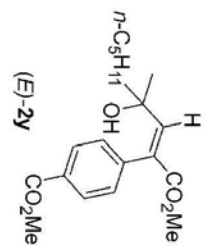

hcf-3-155-C  
 Mar 11 2019  
 SOLVENT: CDCl3  
 NA = 128  
 F1 = 100.612770 MHz  
 F2 = 1.000000 MHz

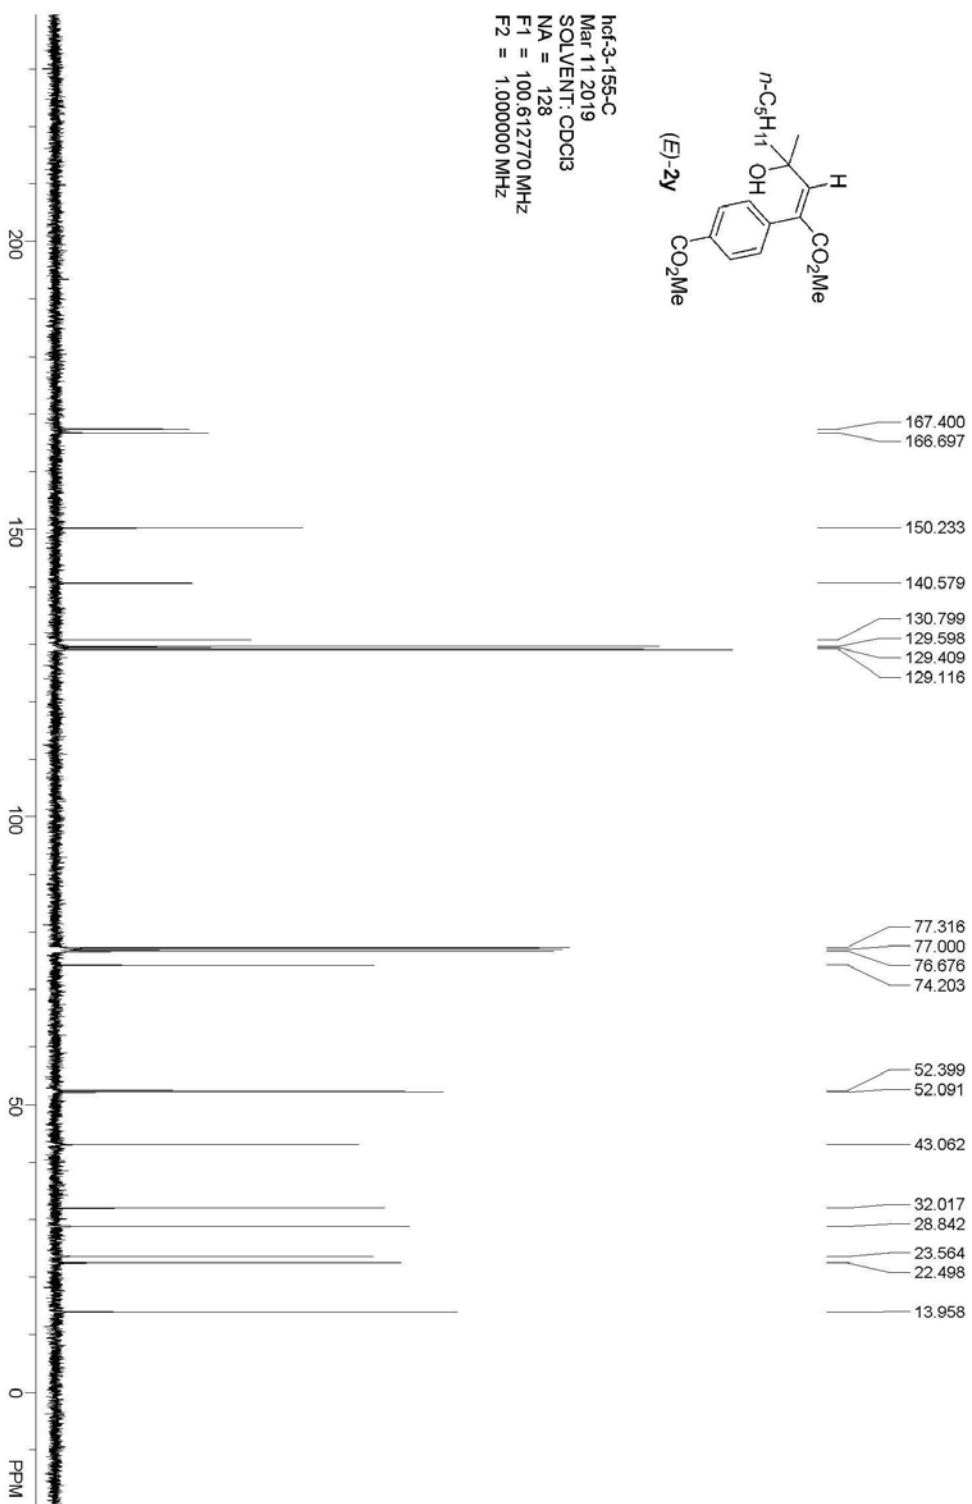

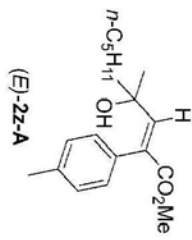

hcf-3-154-H  
 Mar 8 2019  
 SOLVENT: CDCl3  
 NA = 4  
 F1 = 400.130005 MHz  
 F2 = 1.000000 MHz

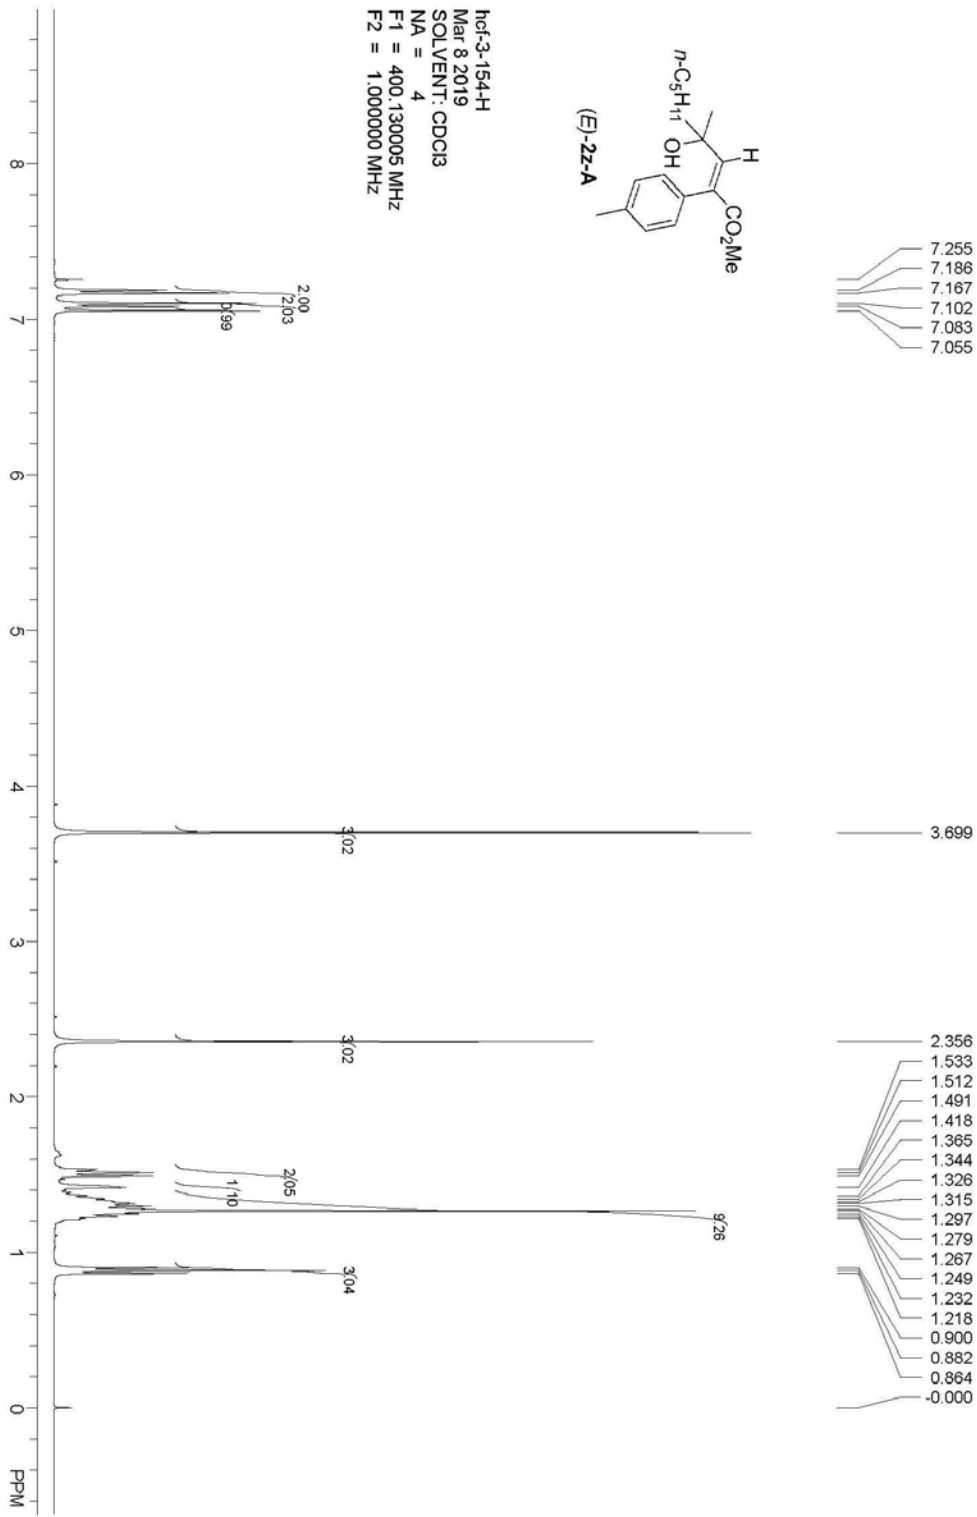

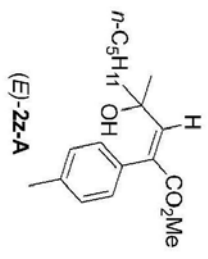

hcf-3-154-C  
 Mar 8 2019  
 SOLVENT: CDCl3  
 NA = 256  
 F1 = 100.612770 MHz  
 F2 = 1.000000 MHz

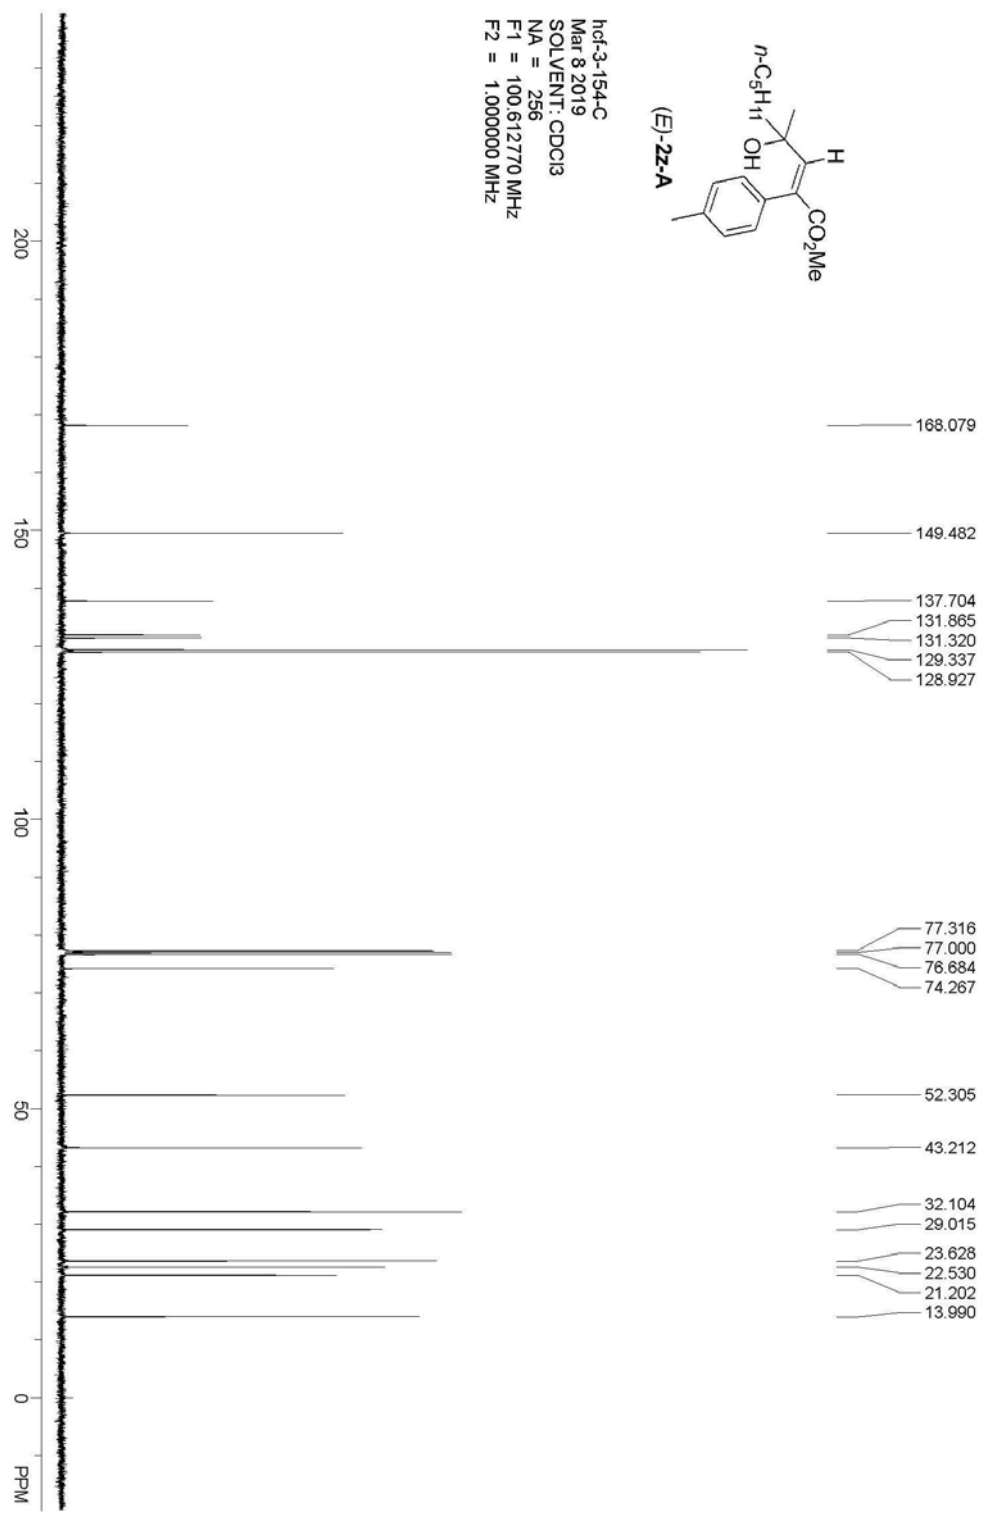

7.261  
7.139  
7.117  
7.056  
6.915  
6.893

3.814  
3.708

1.538  
1.517  
1.496  
1.462  
1.385  
1.367  
1.349  
1.317  
1.298  
1.274  
1.250  
1.234  
1.220  
1.212  
0.901  
0.883  
0.865  
0.000

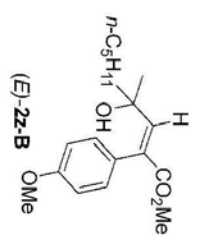

hcf-3-156-H  
Mar 11 2019  
SOLVENT: CDCl3  
NA = 8  
F1 = 400.130005 MHz  
F2 = 1.000000 MHz

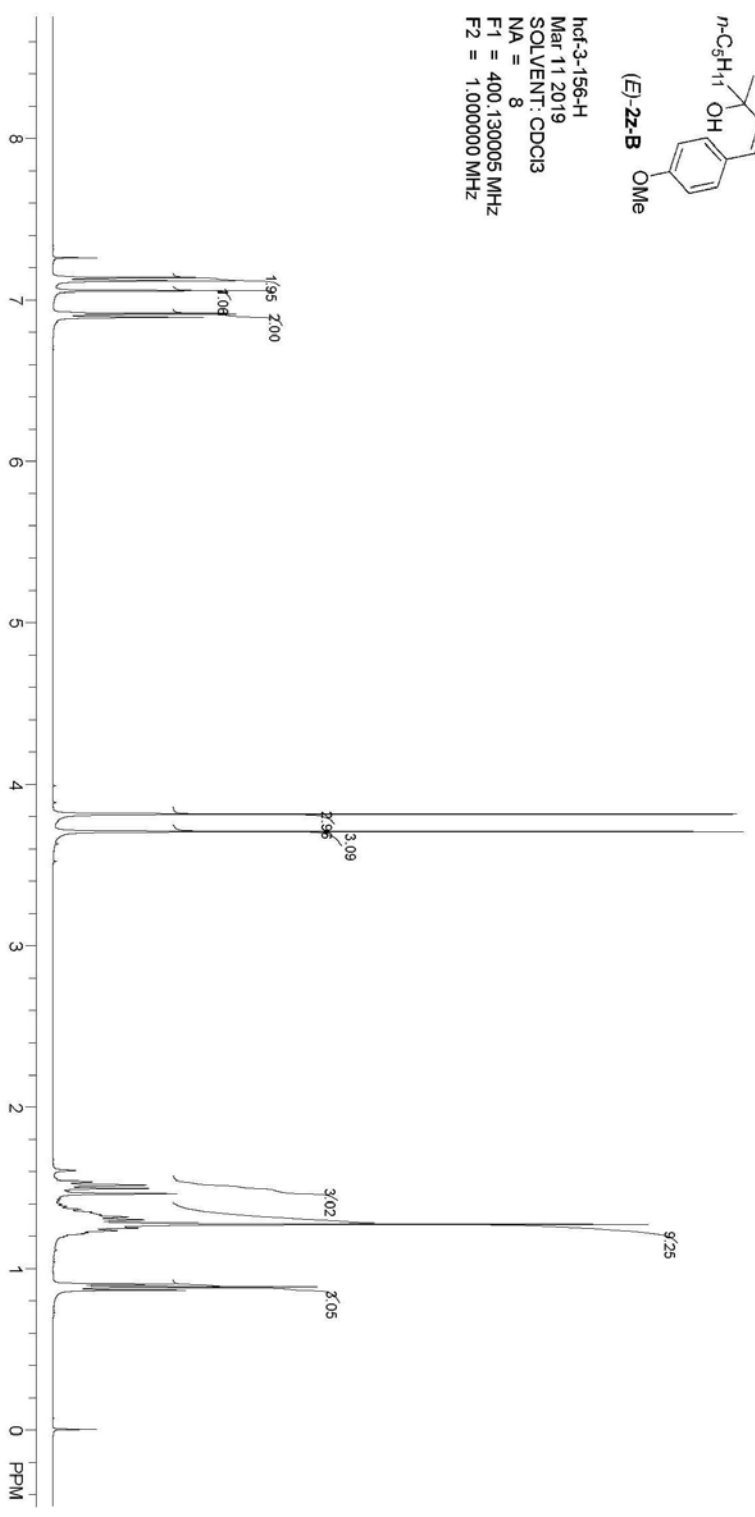

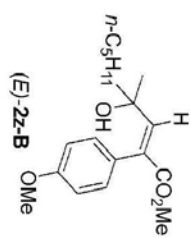

hcf-3-156-C  
 Mar 11 2019  
 SOLVENT: CDCl3  
 NA = 128  
 F1 = 100.612770 MHz  
 F2 = 1.000000 MHz

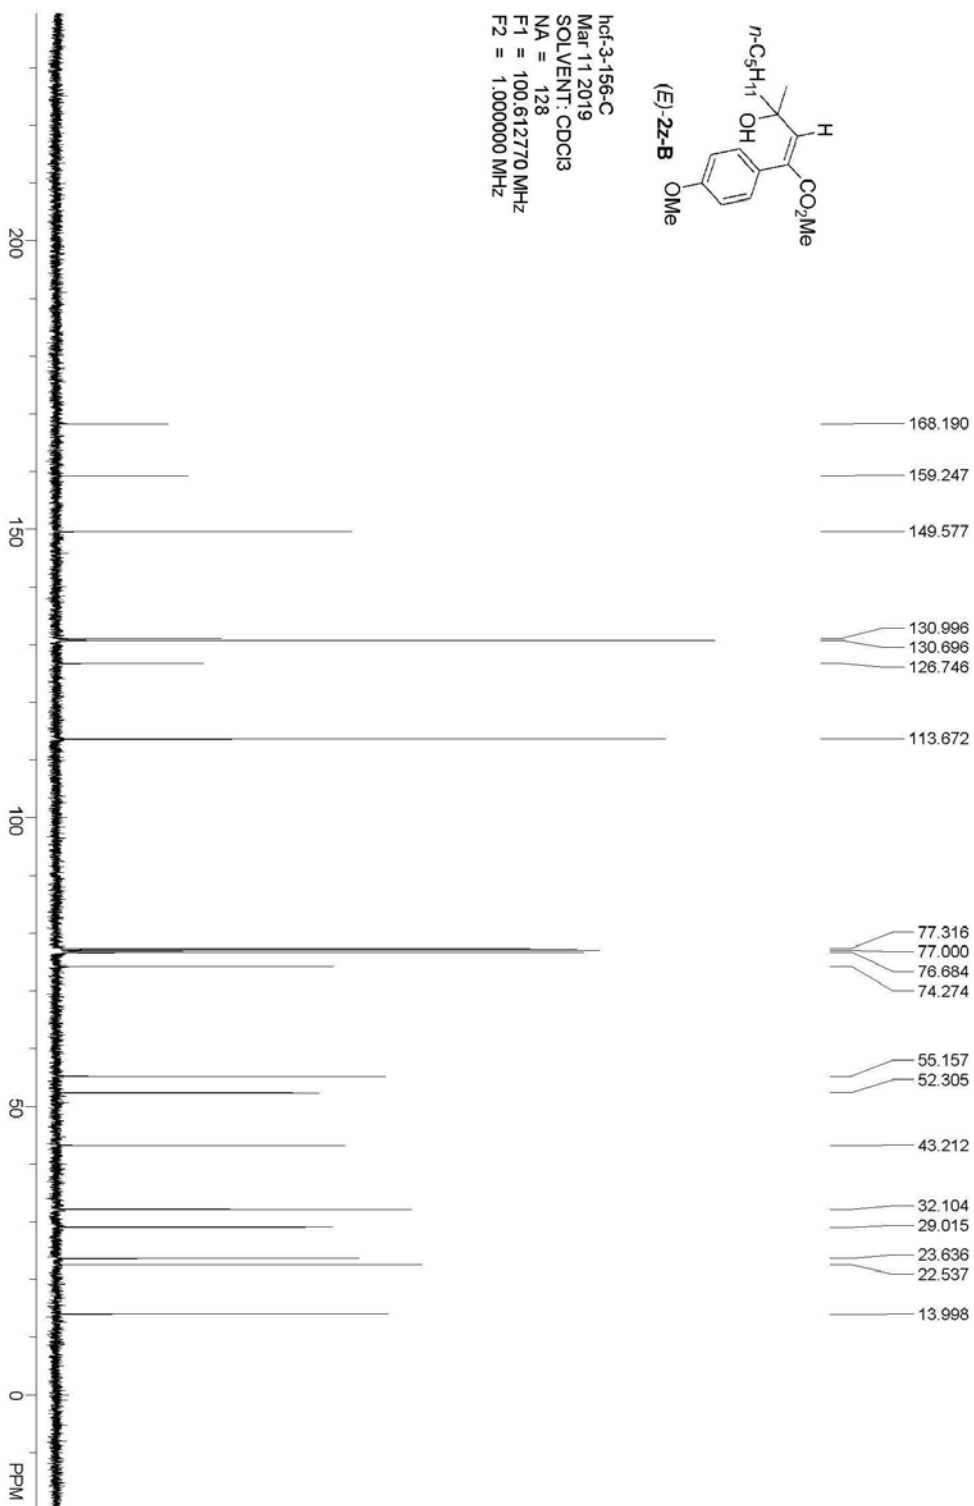



hcf-3-31-cr  
Oct 4 2018  
SOLVENT: CDCl3  
NA = 4  
F1 = 400.130005 MHz  
F2 = 1.000000 MHz

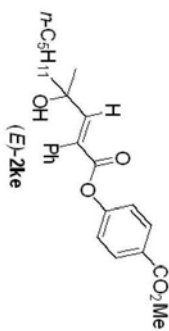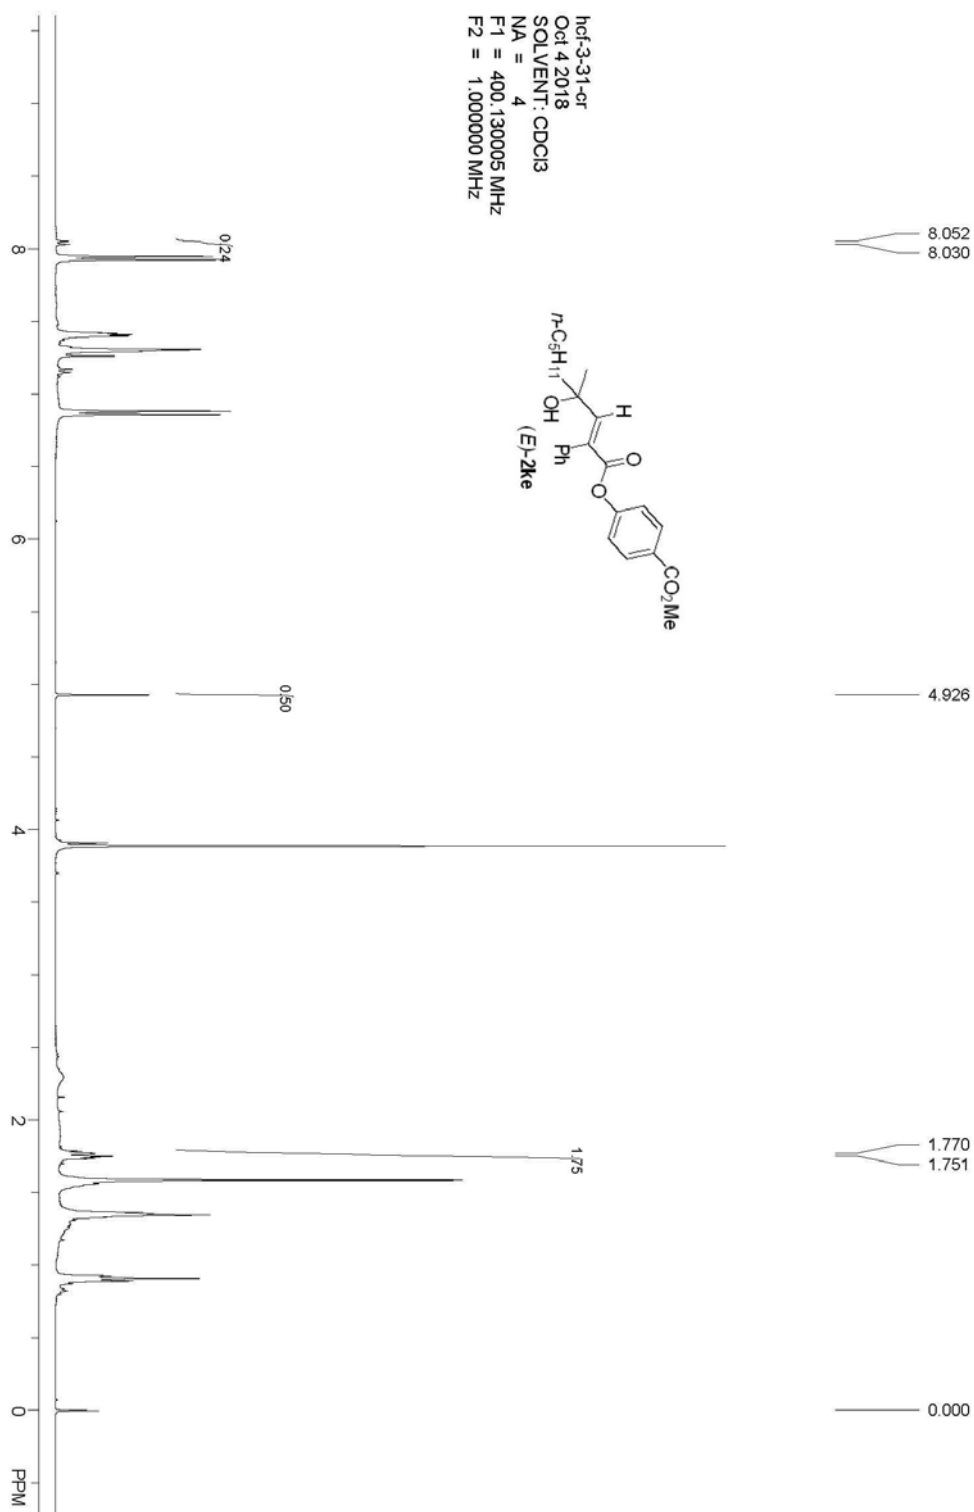

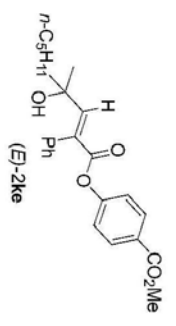

hctf-3-31-H  
 Oct 15 2018  
 SOLVENT: CDCl3  
 NA = 4  
 F1 = 400.130005 MHz  
 F2 = 1.000000 MHz

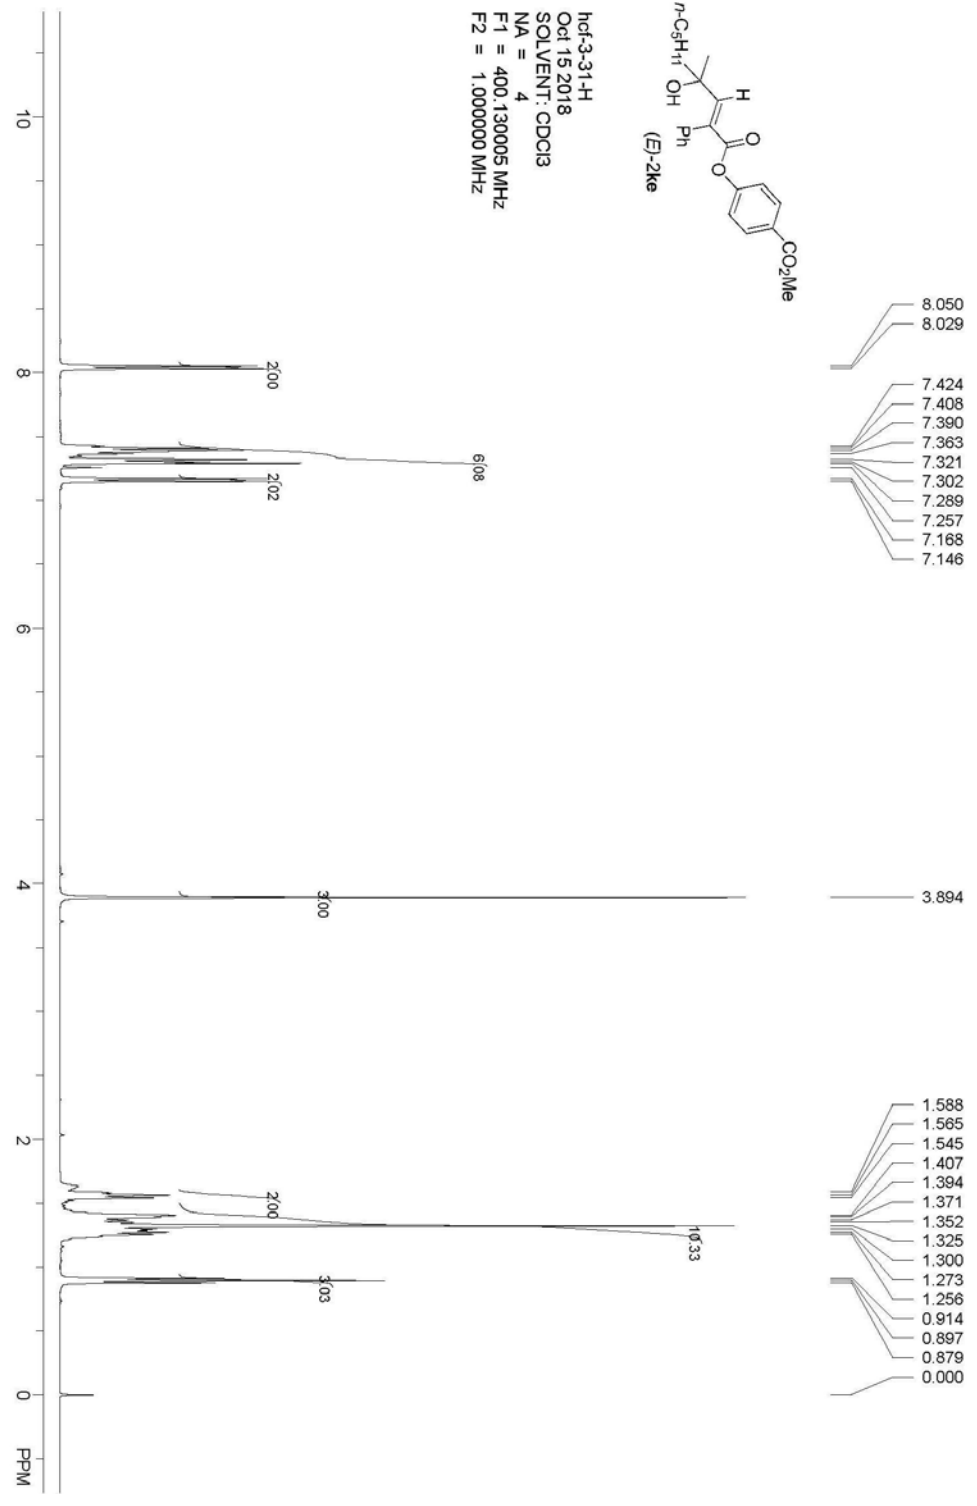

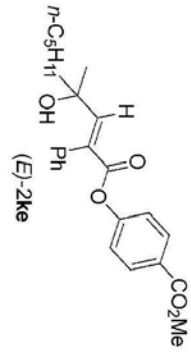

hcf-3-31-C  
 Oct 15 2018  
 SOLVENT: CDCl3  
 NA = 256  
 F1 = 100.612770 MHz  
 F2 = 1.000000 MHz

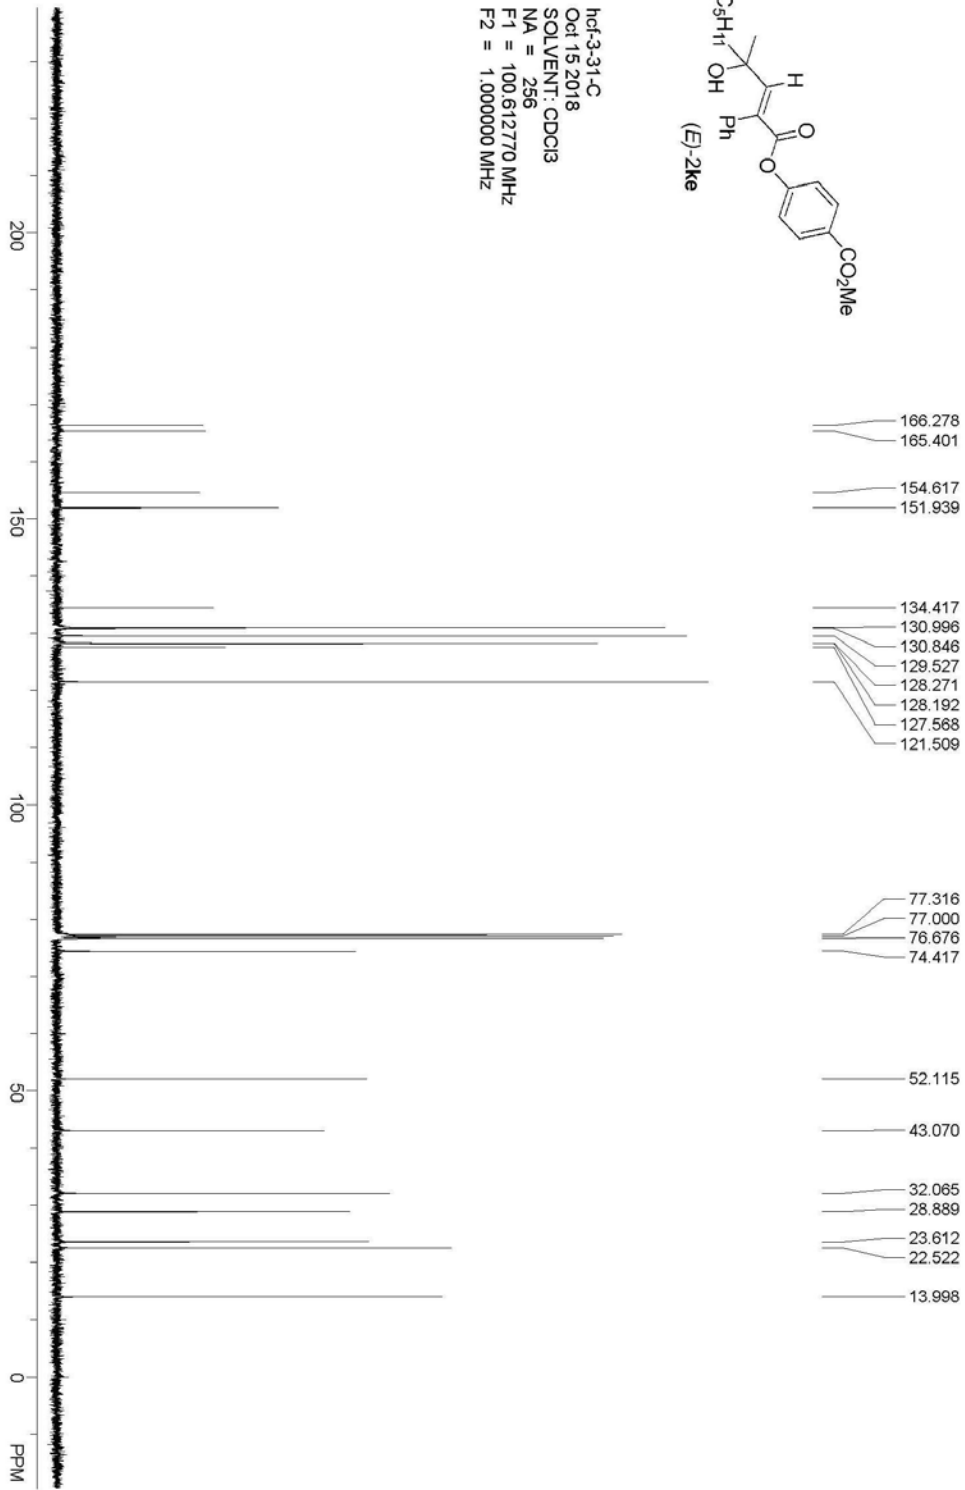

hcf-3-101-cr  
Dec 17 2018  
SOLVENT: CDCl3  
NA = 4  
F1 = 400.130005 MHz  
F2 = 1.000000 MHz

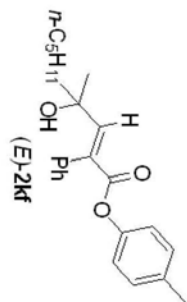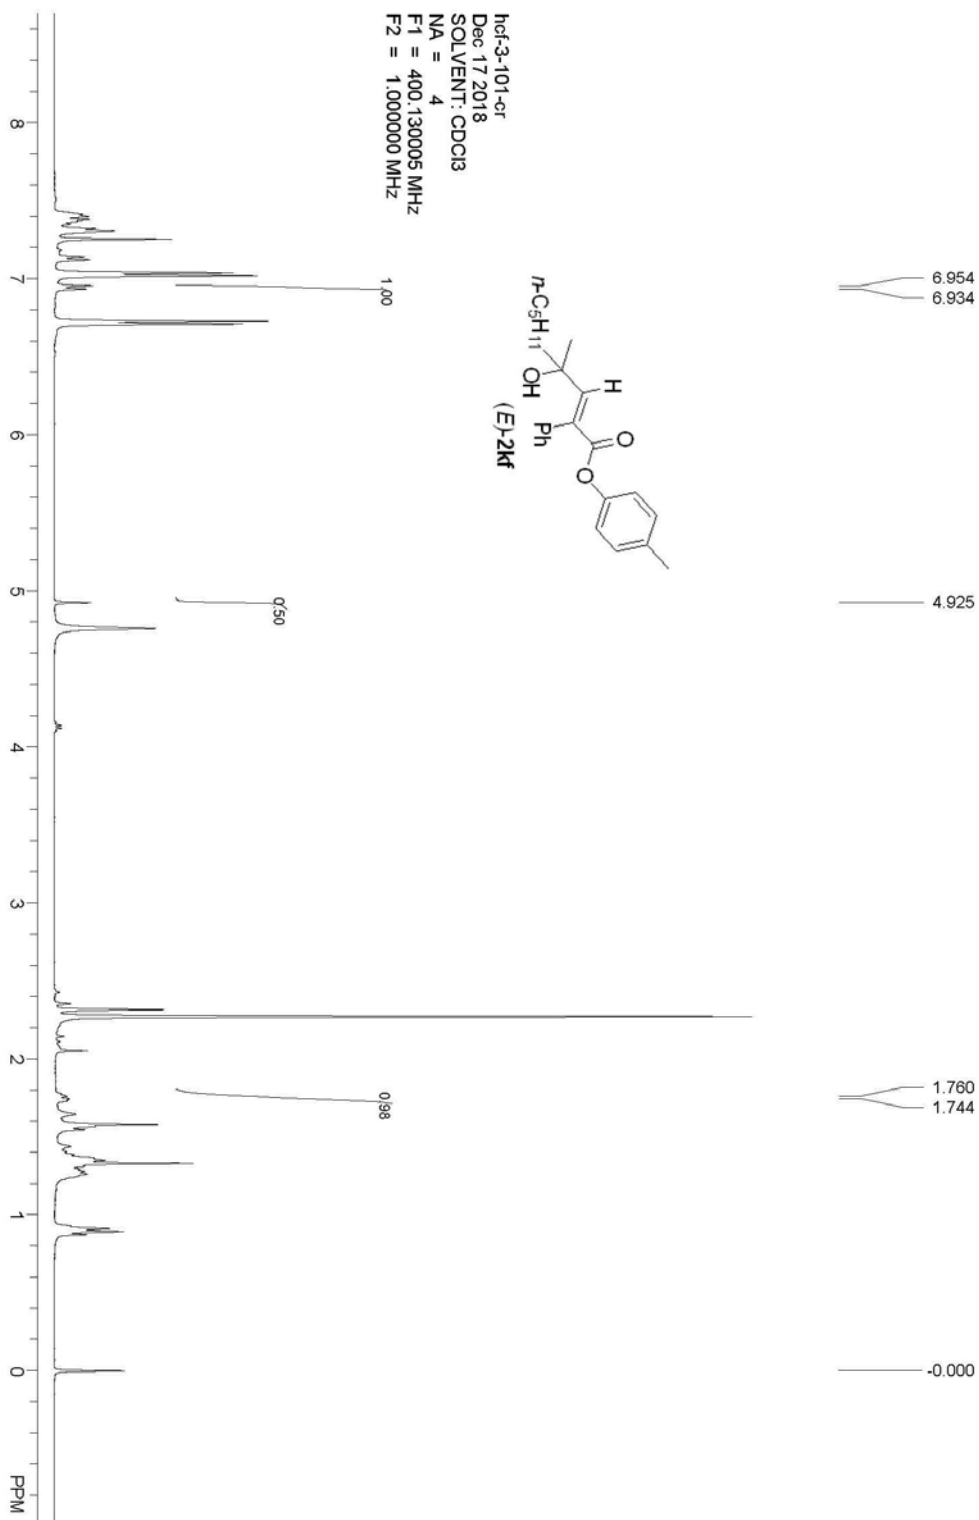

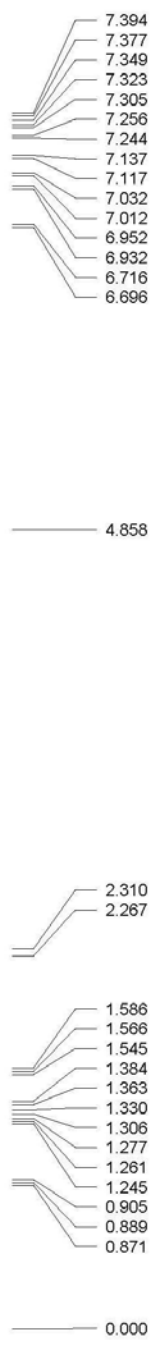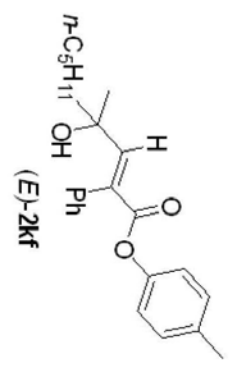

hnf-3-101-H  
 Dec 18 2018  
 SOLVENT: CDCl3  
 NA = 4  
 F1 = 400.130005 MHz  
 F2 = 1.000000 MHz

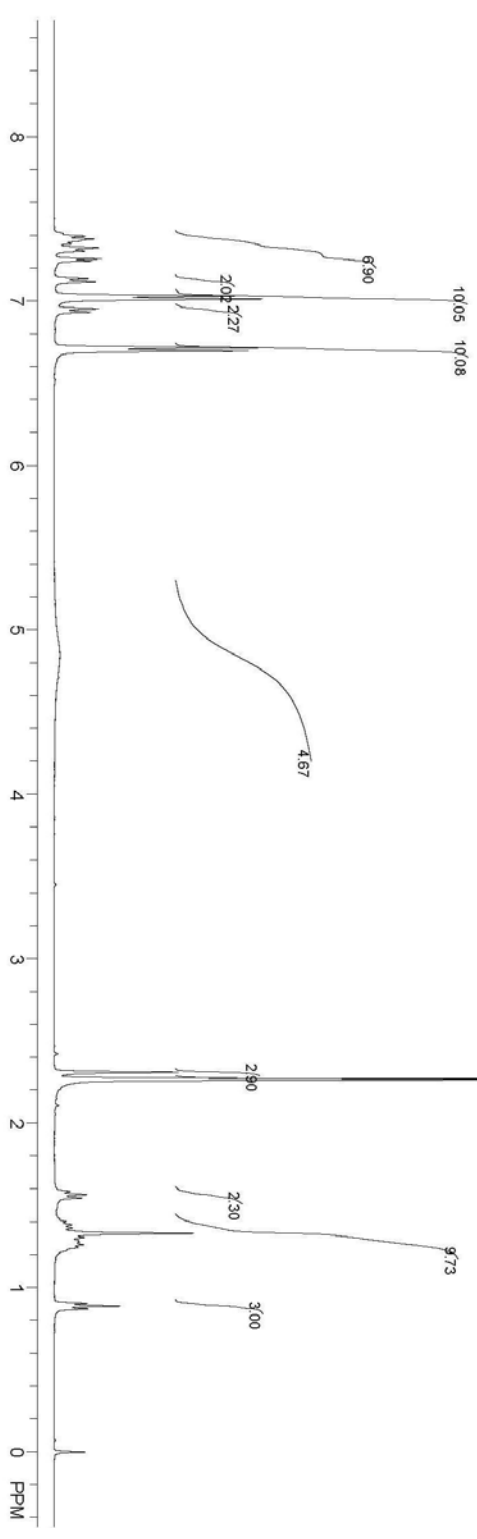

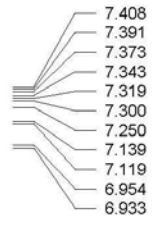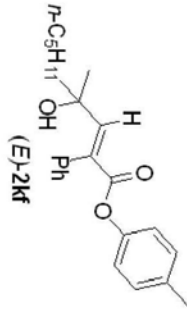

hcf-3-38-H  
Oct 27 2018  
SOLVENT: CDCl<sub>3</sub>  
NA = 4  
F1 = 400.130005 MHz  
F2 = 1.0000000 MHz

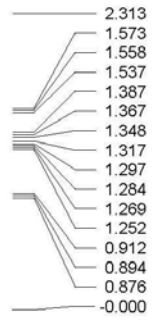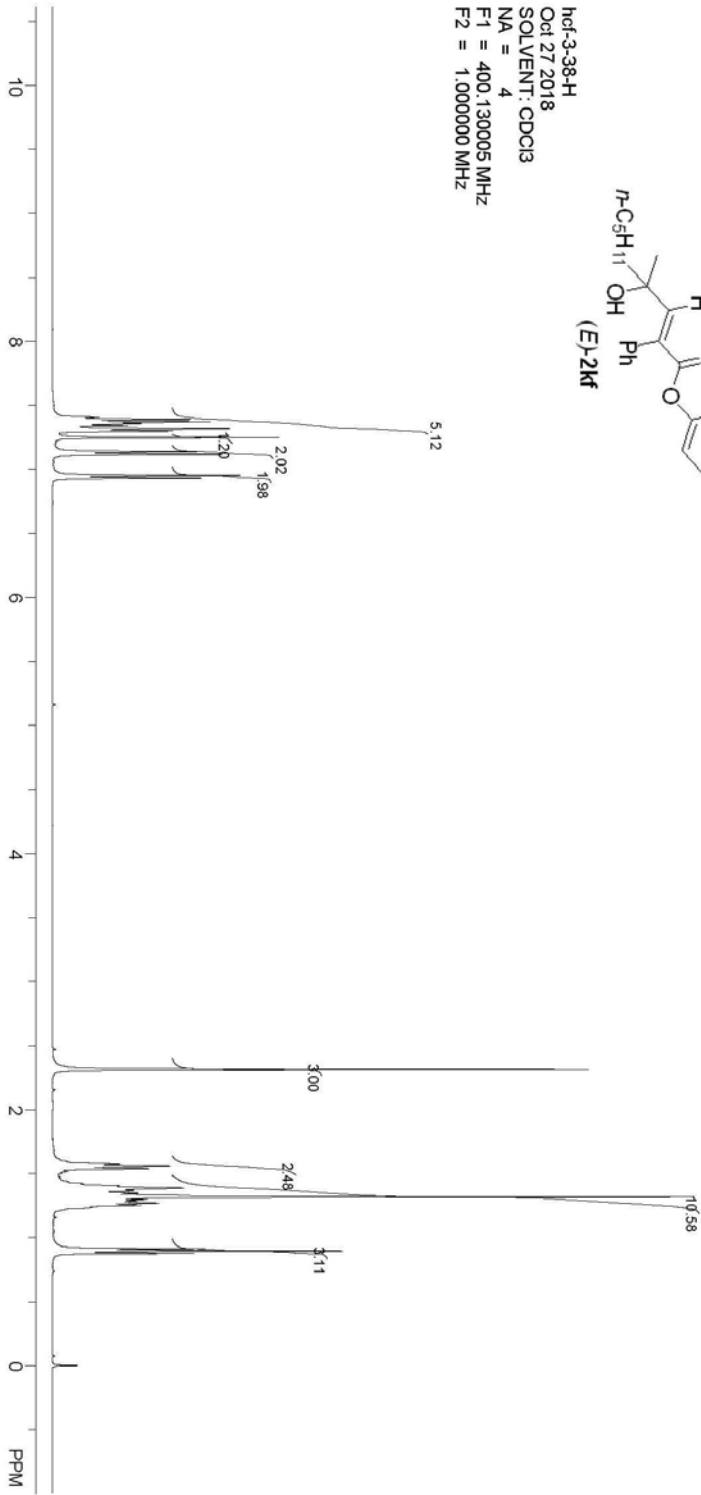

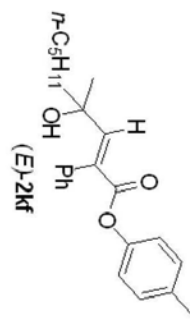

hcf-3-38-C  
 Oct 27 2018  
 SOLVENT: CDCl<sub>3</sub>  
 NA = 256  
 F1 = 100.612770 MHz  
 F2 = 1.000000 MHz

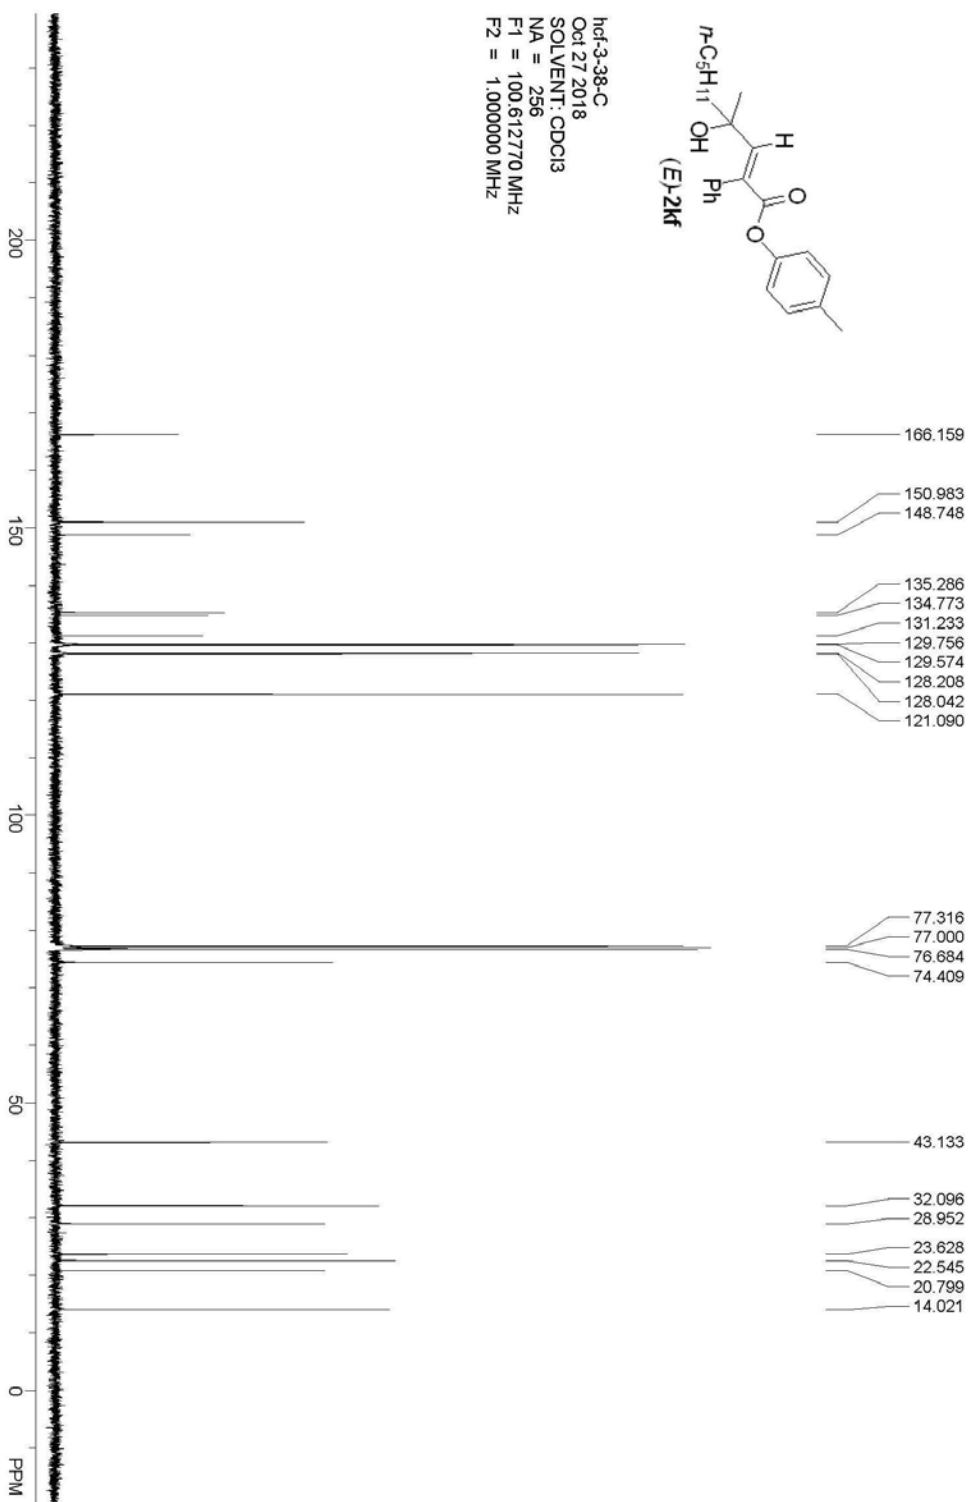

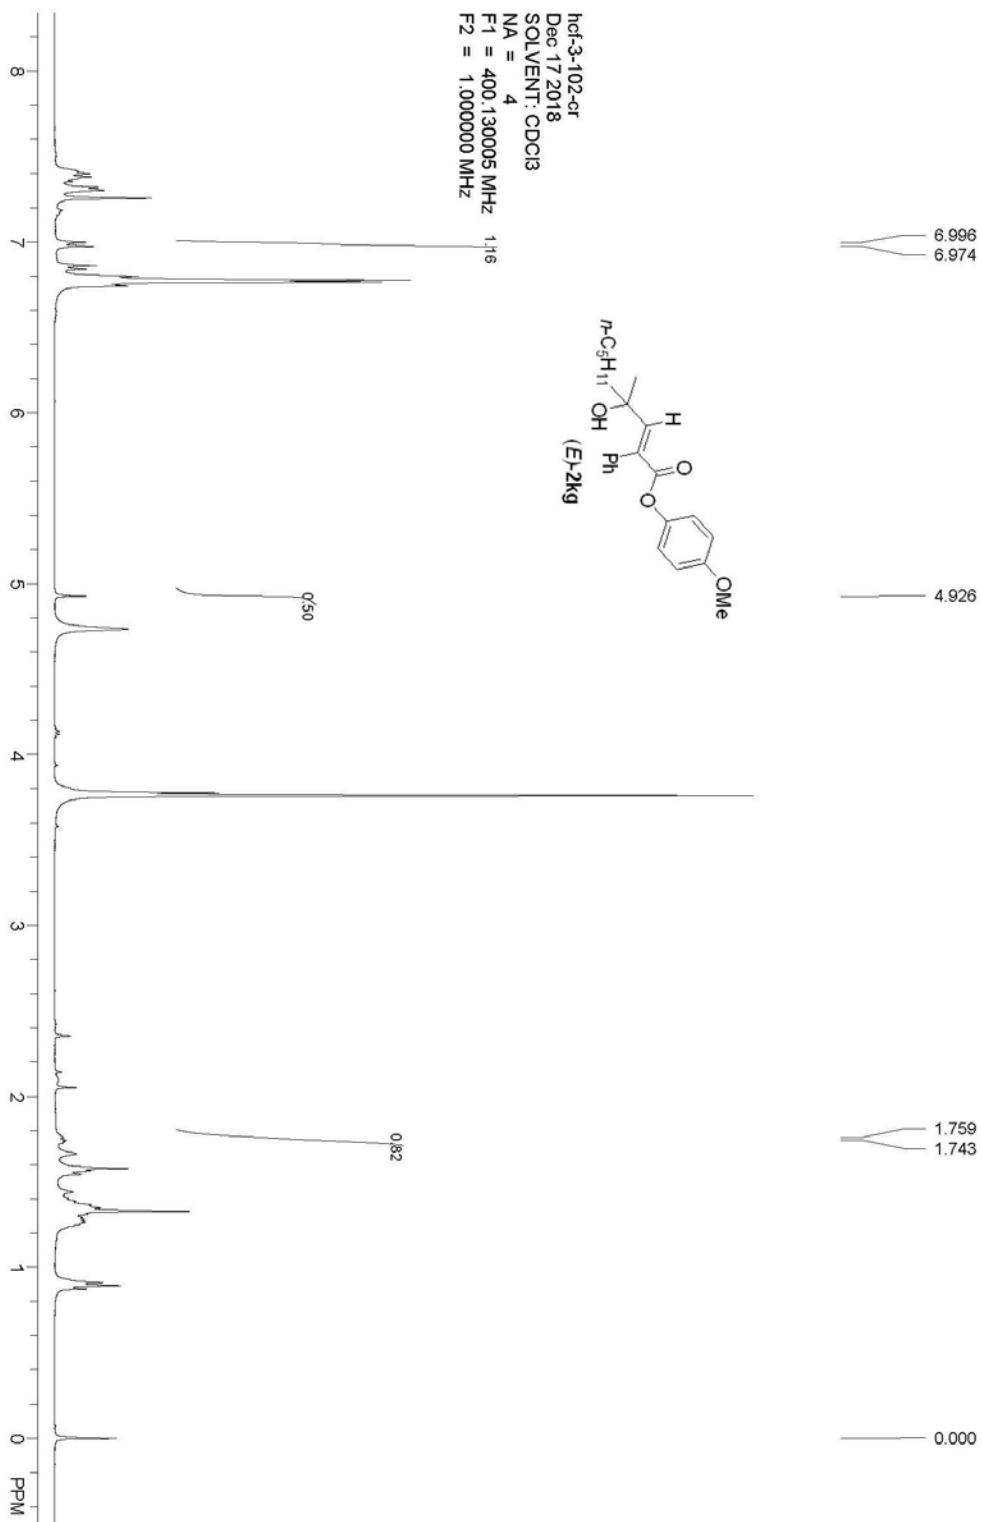



7.407  
7.391  
7.373  
7.347  
7.318  
7.300  
7.261  
7.246  
6.992  
6.970  
6.855  
6.833  
6.786  
6.763  
6.743  
6.721  
5.500

3.752

1.586  
1.565  
1.545  
1.400  
1.382  
1.360  
1.327  
1.300  
1.275  
1.257  
1.239  
0.902  
0.885  
0.867  
-0.000

hcf-3-102-H  
Dec 18 2018  
SOLVENT: CDCl3  
NA = 4  
F1 = 400.130005 MHz  
F2 = 1.000000 MHz

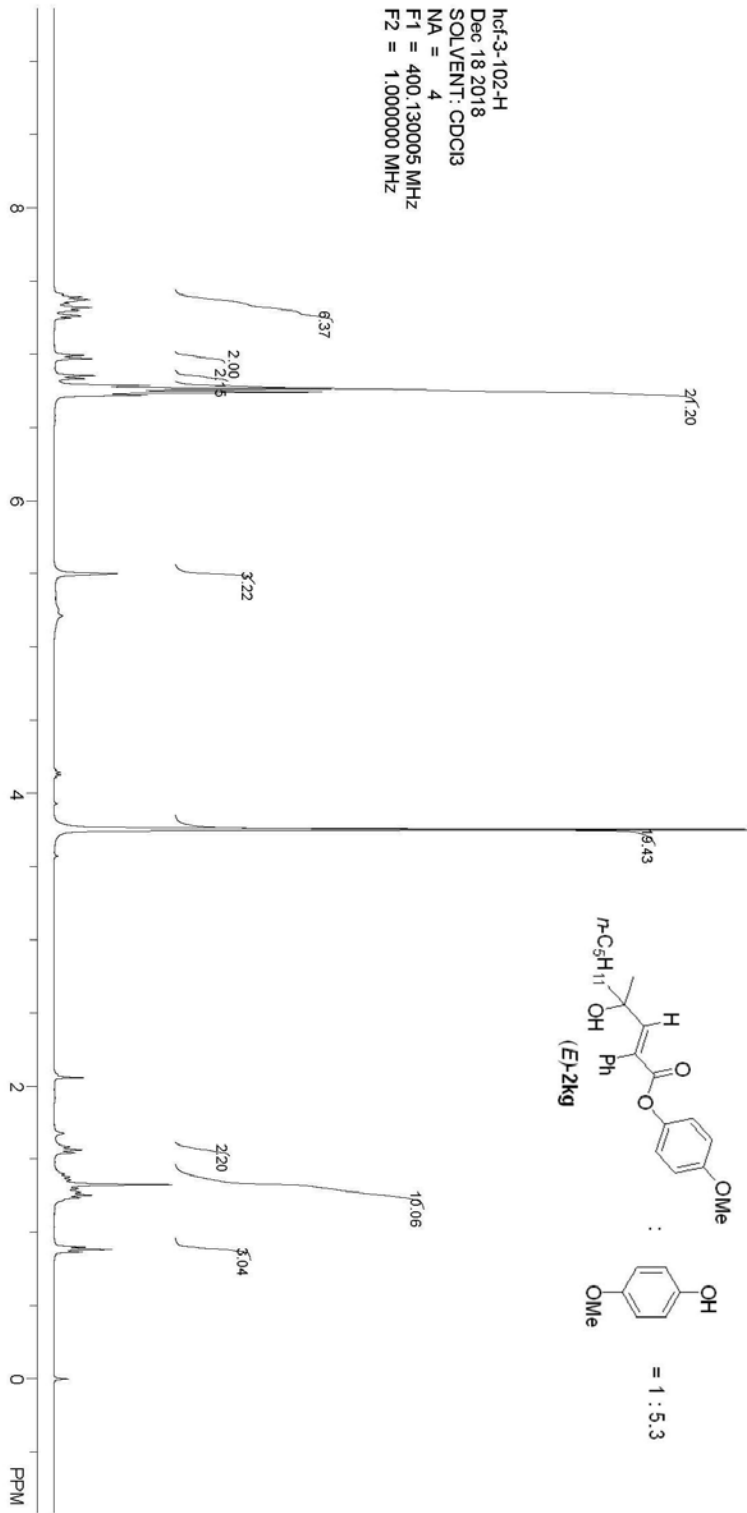

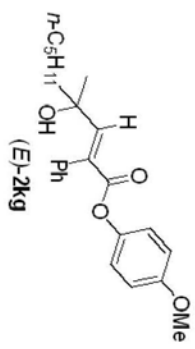

hcf-3-52-H  
 Oct 26 2018  
 SOLVENT: CDCl3  
 NA = 4  
 F1 = 400.130005 MHz  
 F2 = 1.000000 MHz

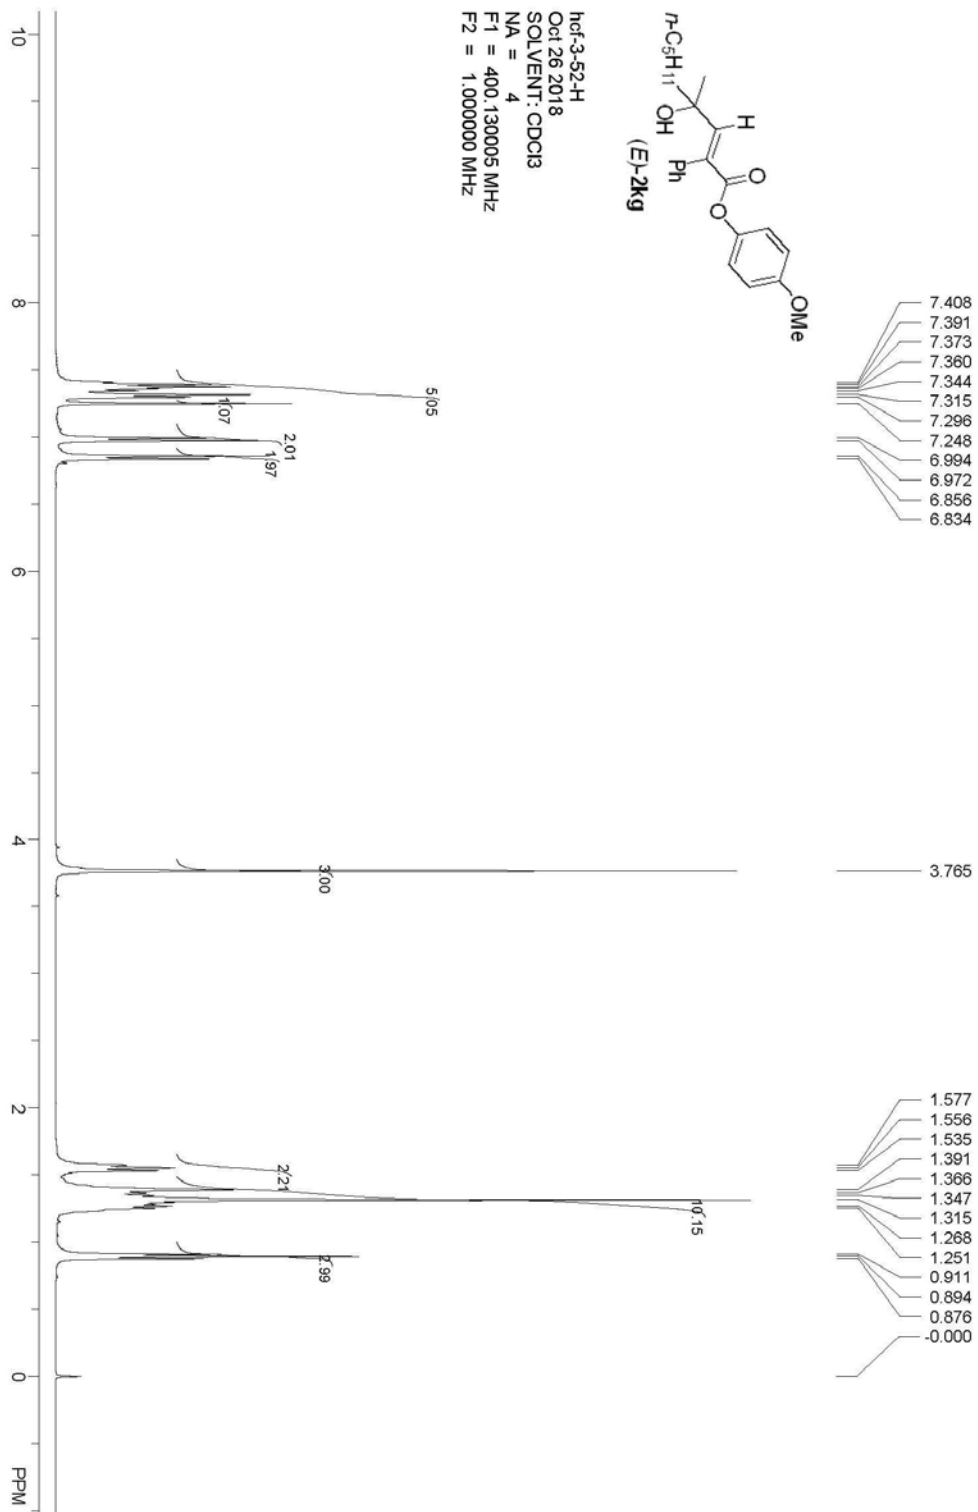

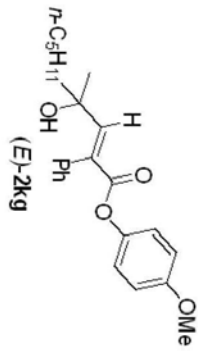

hcf-3-52-C  
 Oct 26 2018  
 SOLVENT: CDCl3  
 NA = 256  
 F1 = 100.612770 MHz  
 F2 = 1,000,000 MHz

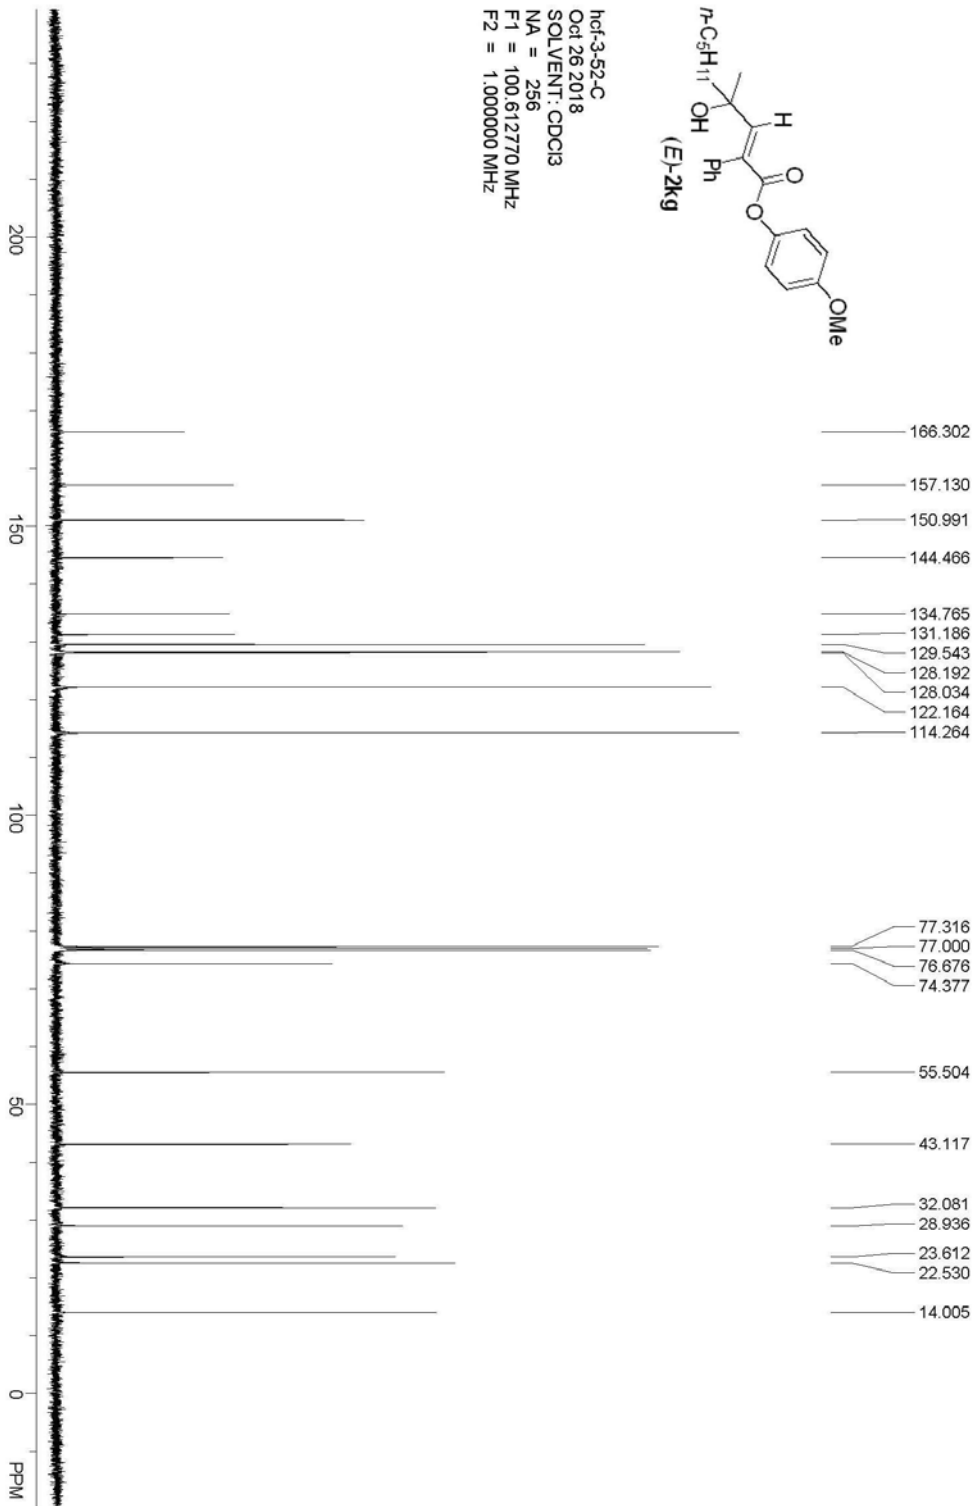

hcf-3-103-or  
Dec 17 2018  
SOLVENT: CDCl3  
NA = 4  
F1 = 400.130005 MHz  
F2 = 1.000000 MHz

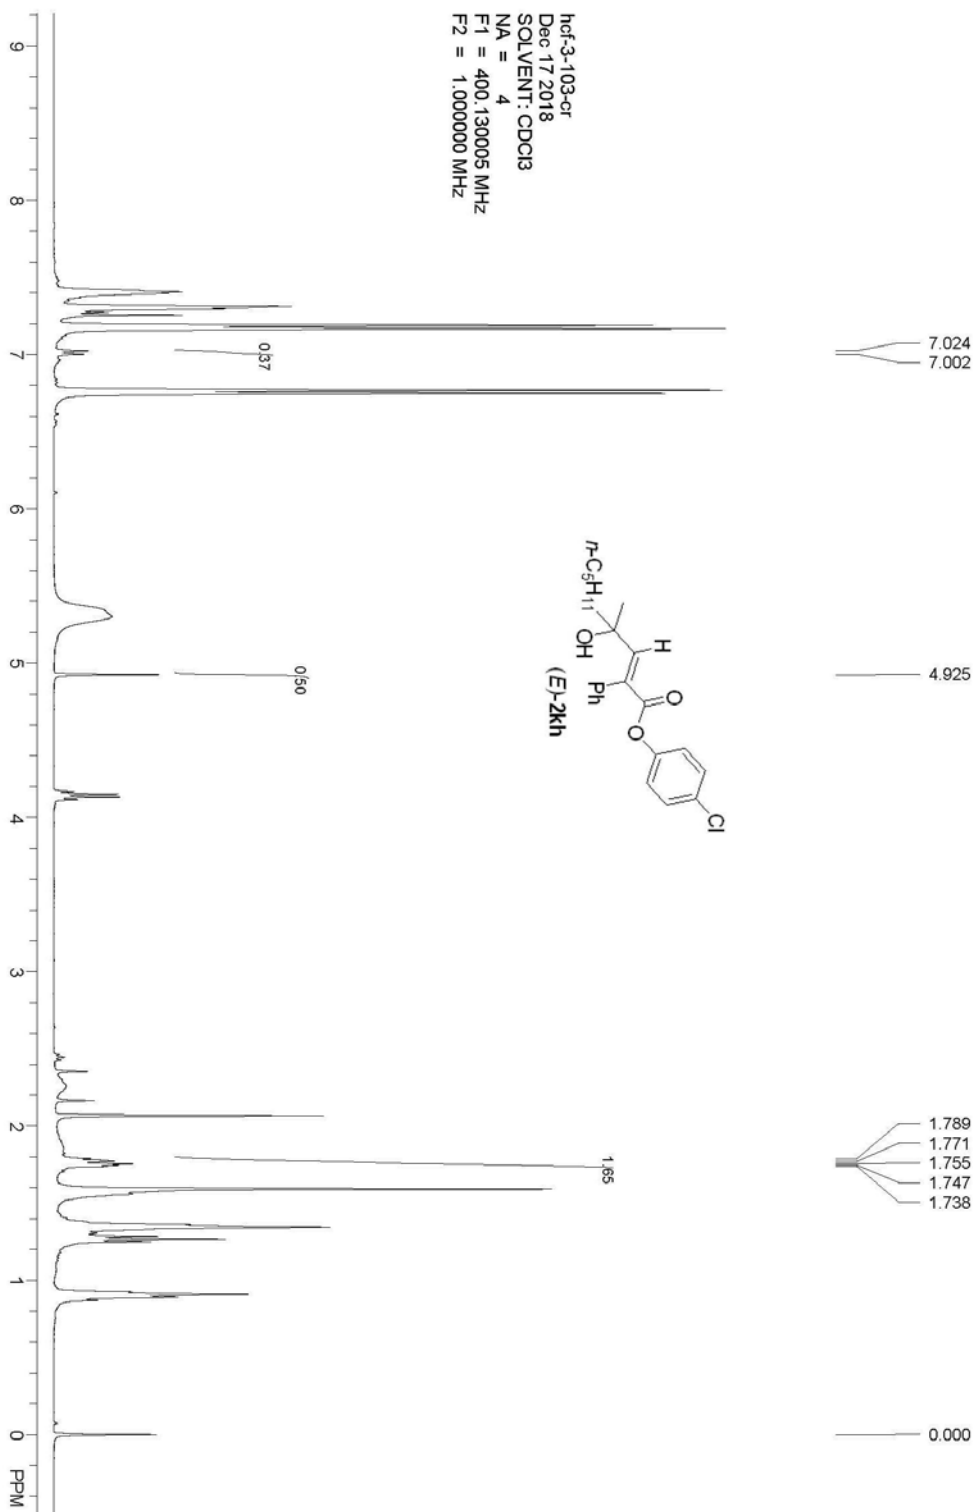

hof-3-103-H  
 Dec 18 2018  
 SOLVENT: CDCl3  
 NA = 4  
 F1 = 400.130005 MHz  
 F2 = 1.000000 MHz

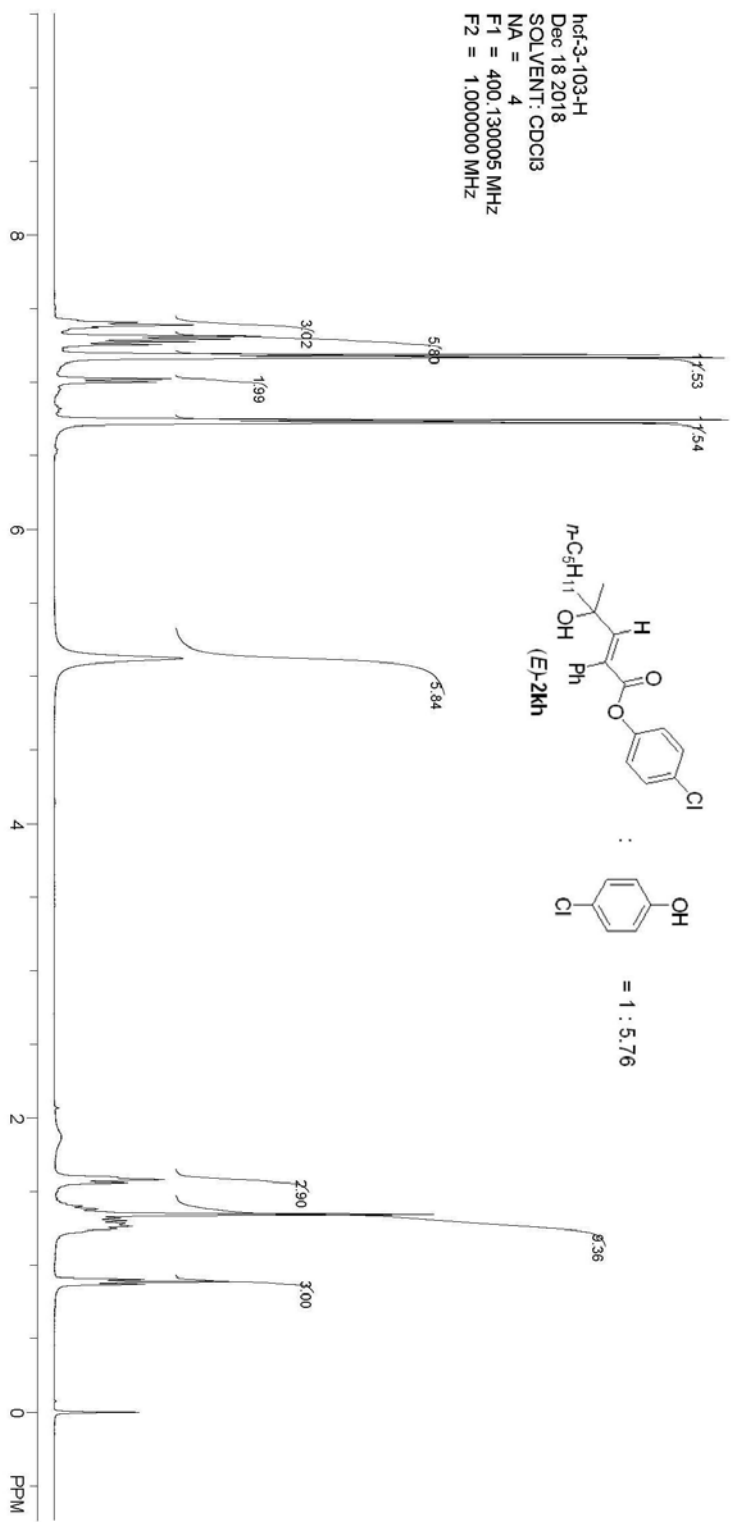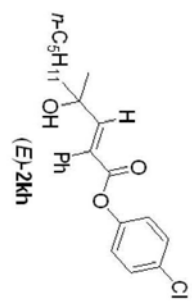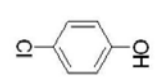

= 1 : 5.76

- 7.422
- 7.406
- 7.388
- 7.369
- 7.314
- 7.293
- 7.274
- 7.253
- 7.187
- 7.165
- 7.022
- 7.000
- 6.744
- 6.722

5.121

- 1.598
- 1.581
- 1.559
- 1.401
- 1.381
- 1.345
- 1.322
- 1.303
- 1.284
- 1.264
- 1.247
- 0.904
- 0.888
- 0.870
- 0.000

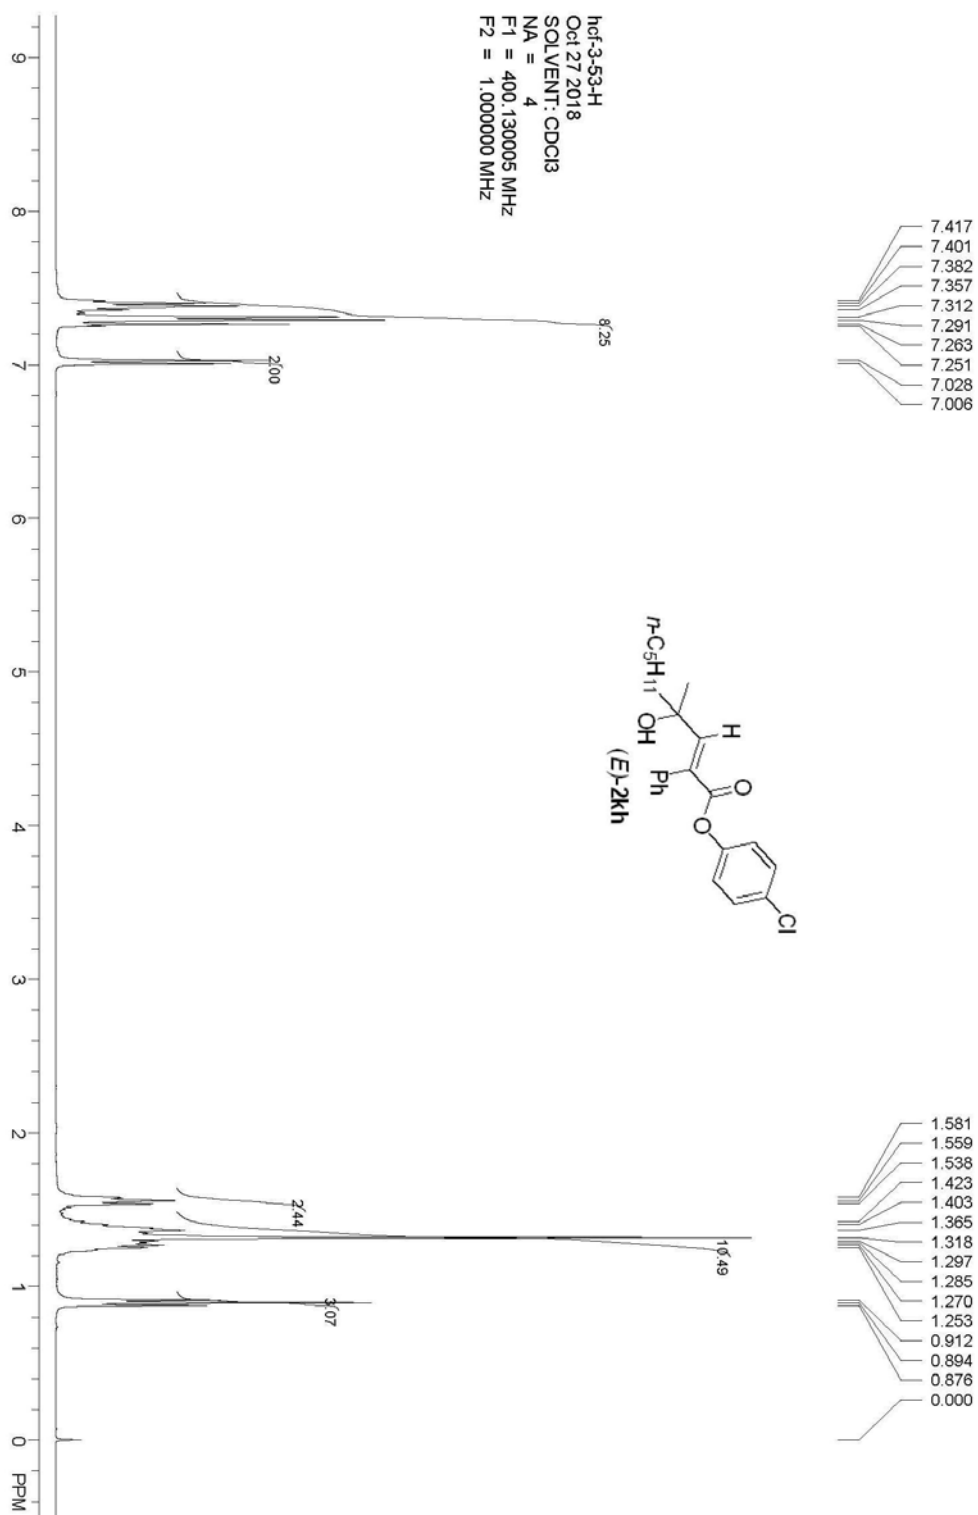

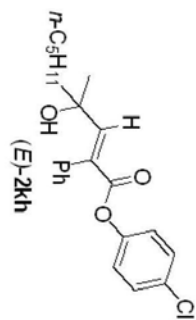

hcf:3-53-C  
 Oct 27 2018  
 SOLVENT: CDCl3  
 NA = 256  
 F1 = 100.612770 MHz  
 F2 = 1.0000000 MHz

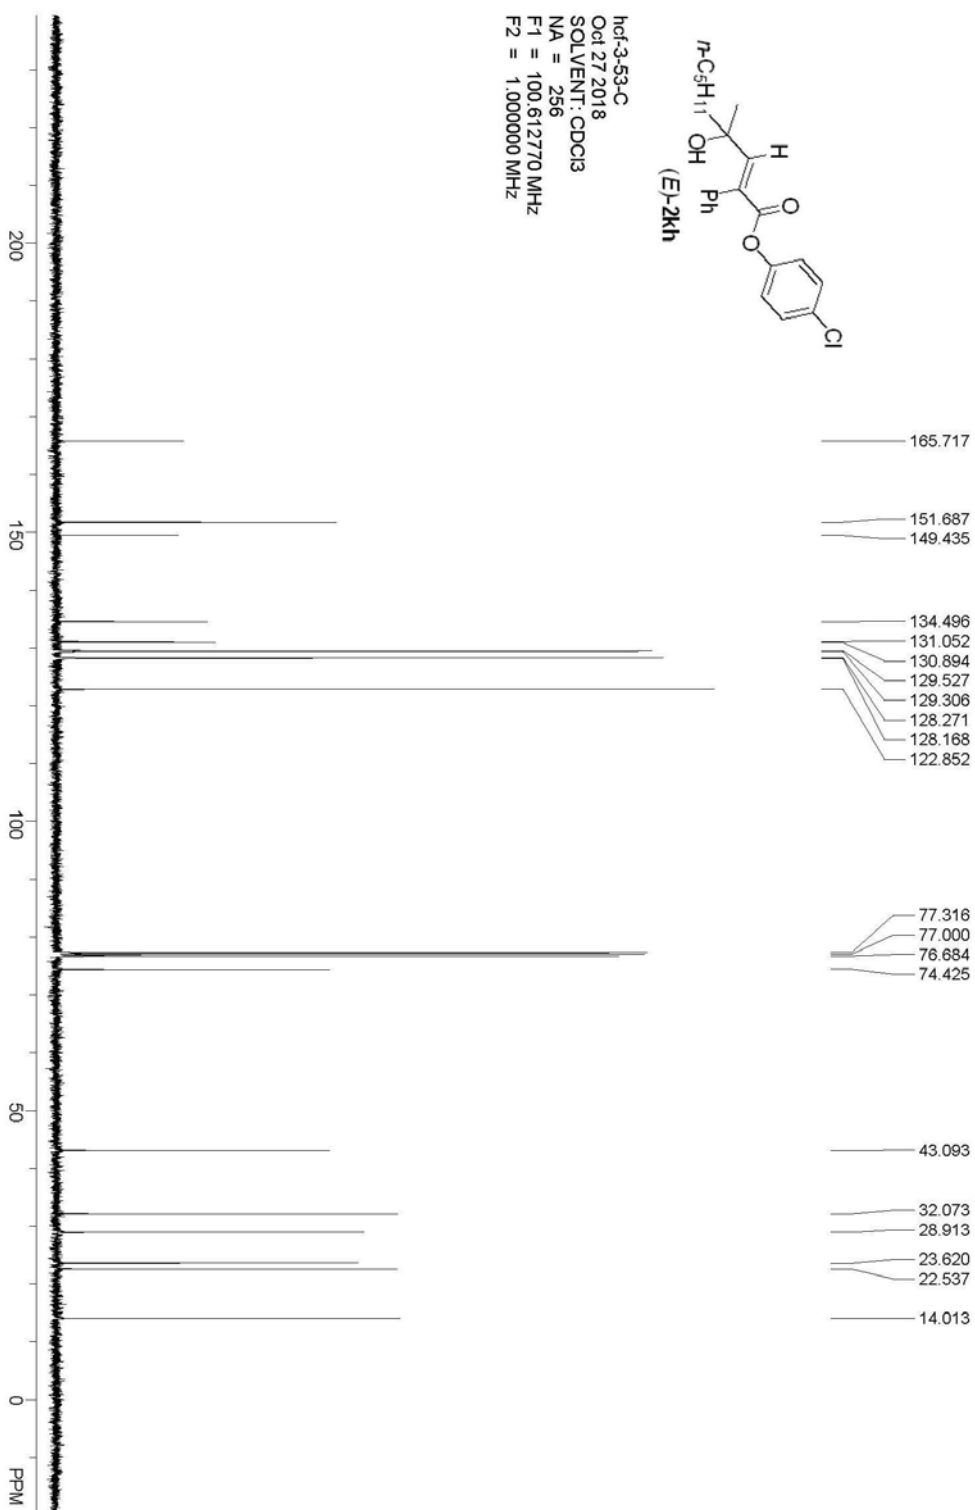

Supplement: c8sc05743e1.pdf [file c8sc05743e1.pdf]
